# Supplementary material for: Expanded methylome and quantitative trait loci detection by long-read profiling of personal DNA
Source: HighWire-hosted journal article supplement (doi:10.1101/gr.279240.124), 2025-03-20
Supplement: Supplemental_Material_.pdf [file Supplemental_Material_.pdf]

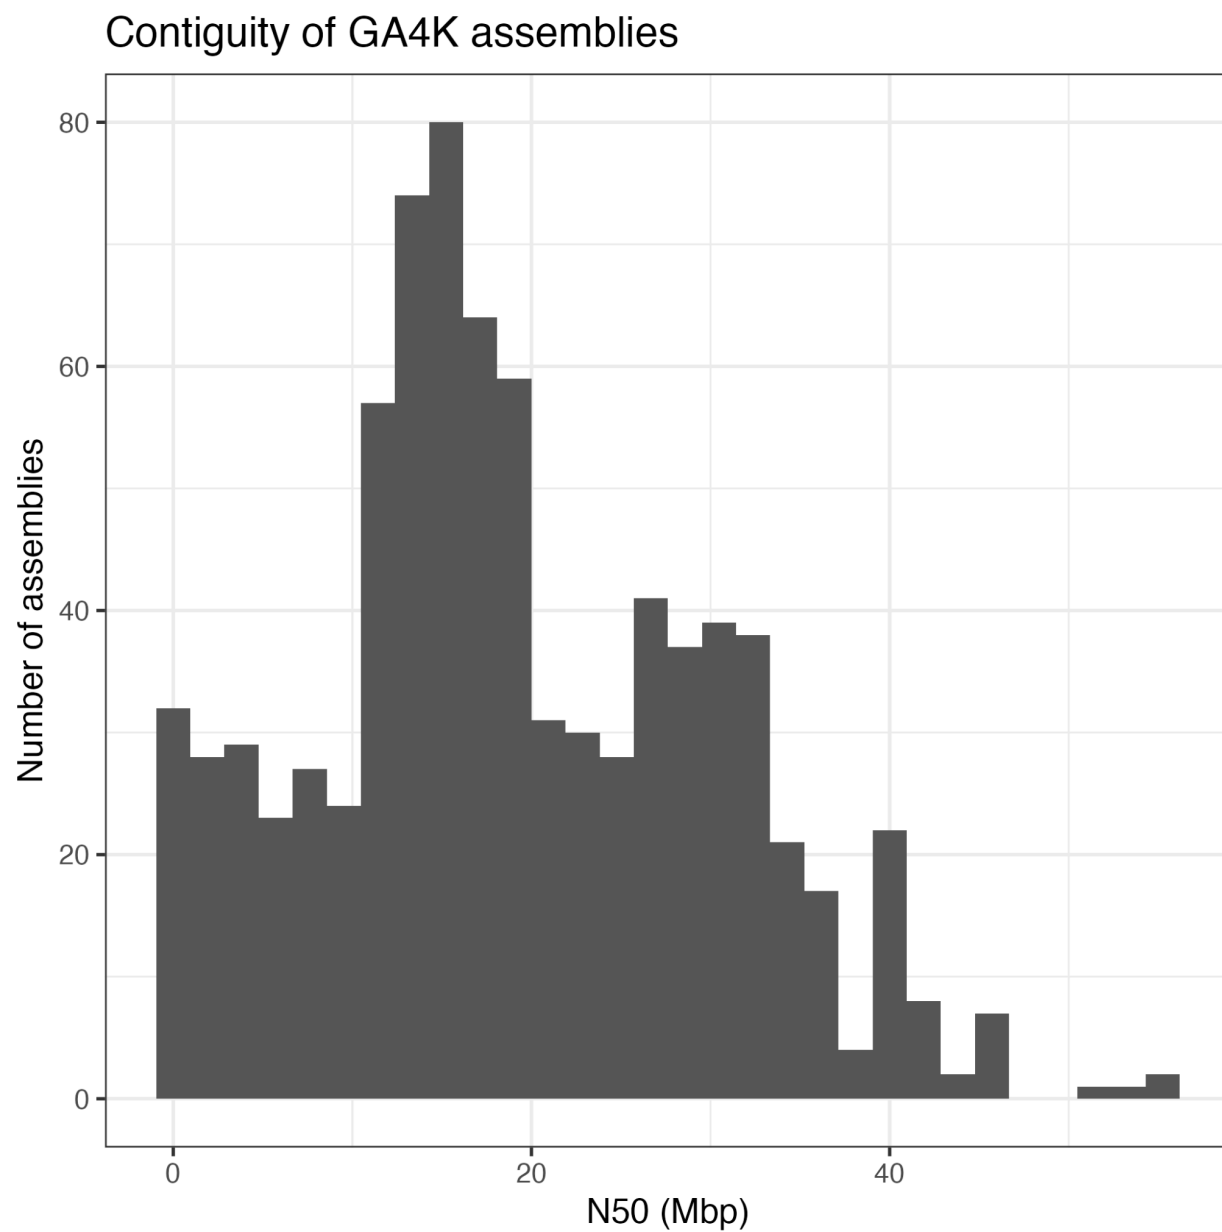

Fig S1: N50 distribution of the 782 GA4K assemblies that were used to construct the pangenome graph with minigraph.

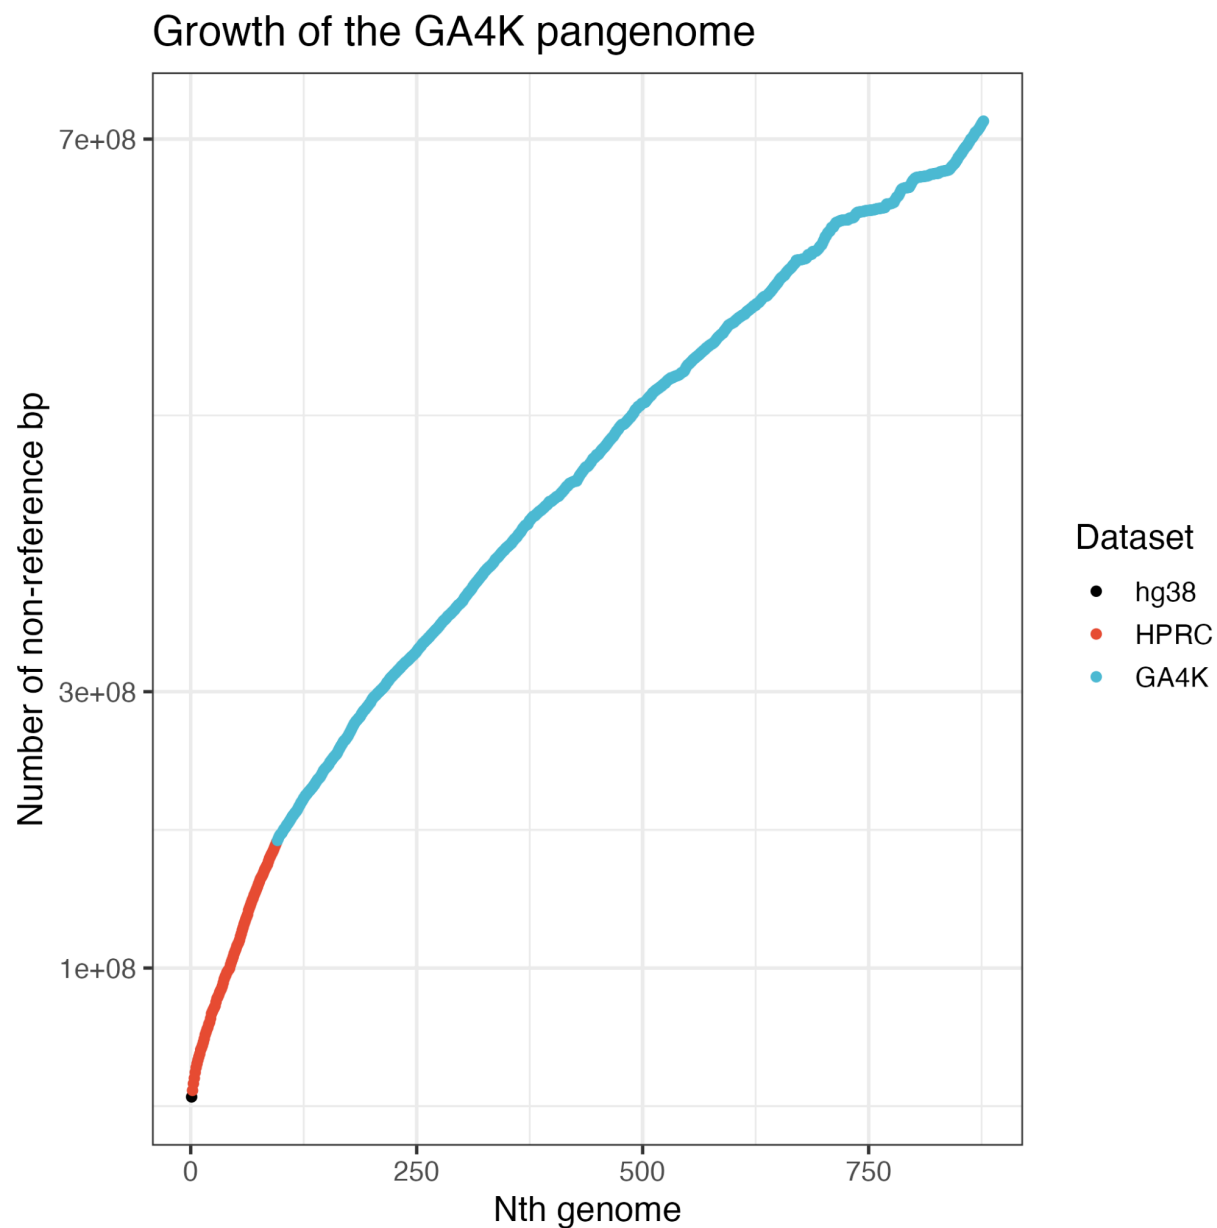

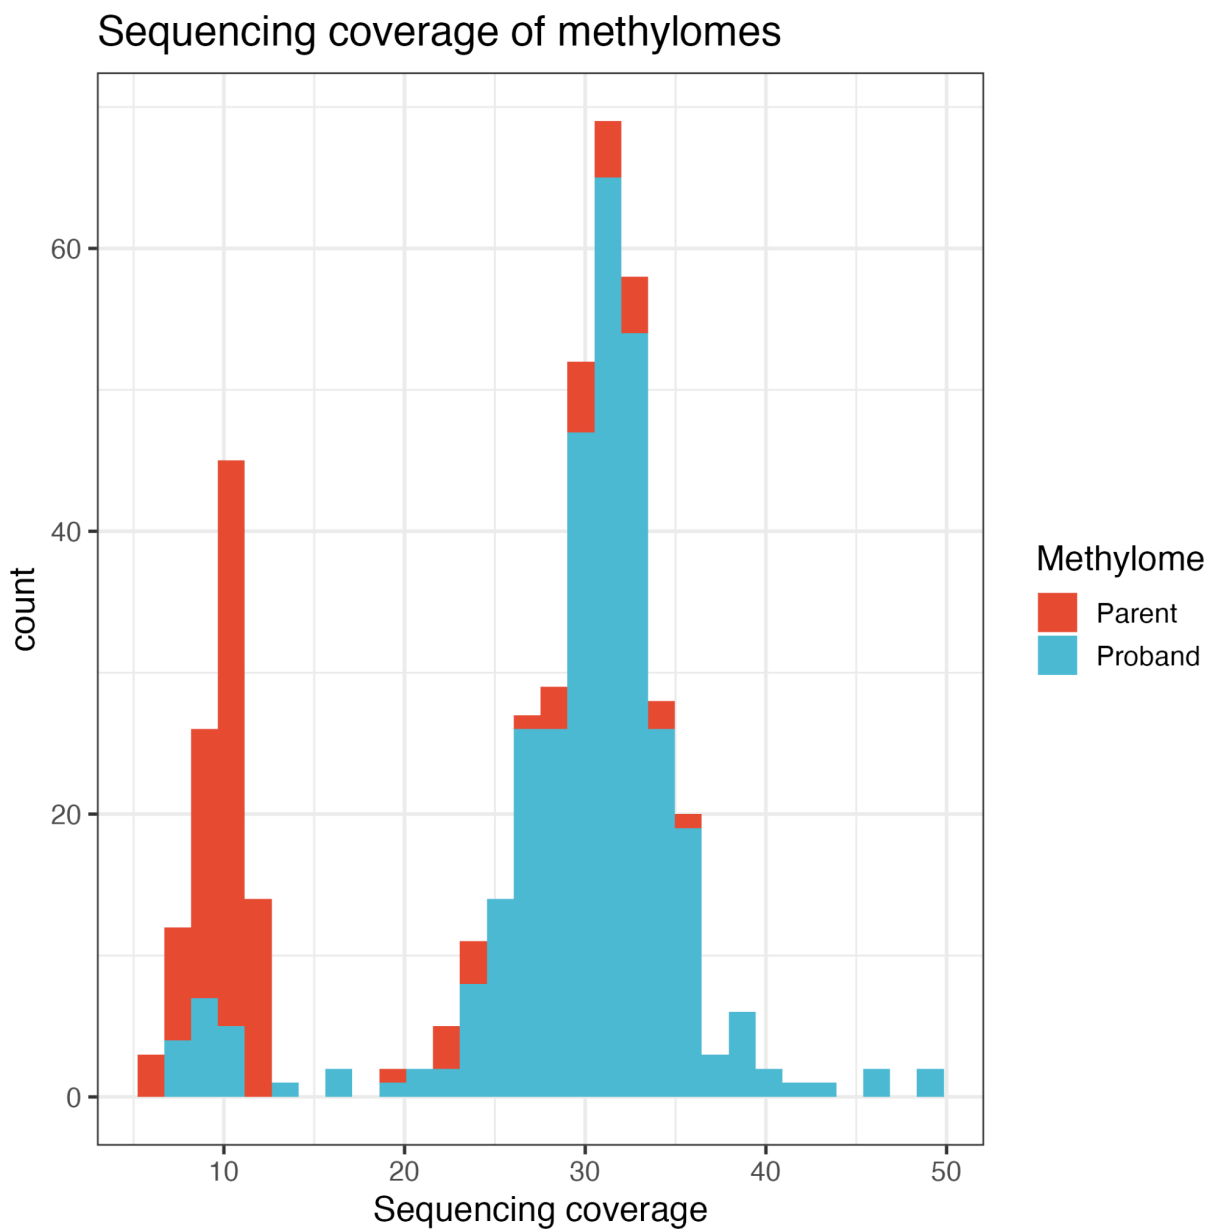

Fig S3: Sequencing depth of the 435 GA4K methylomes that were mapped to the GA4K pangenome with minigraph.

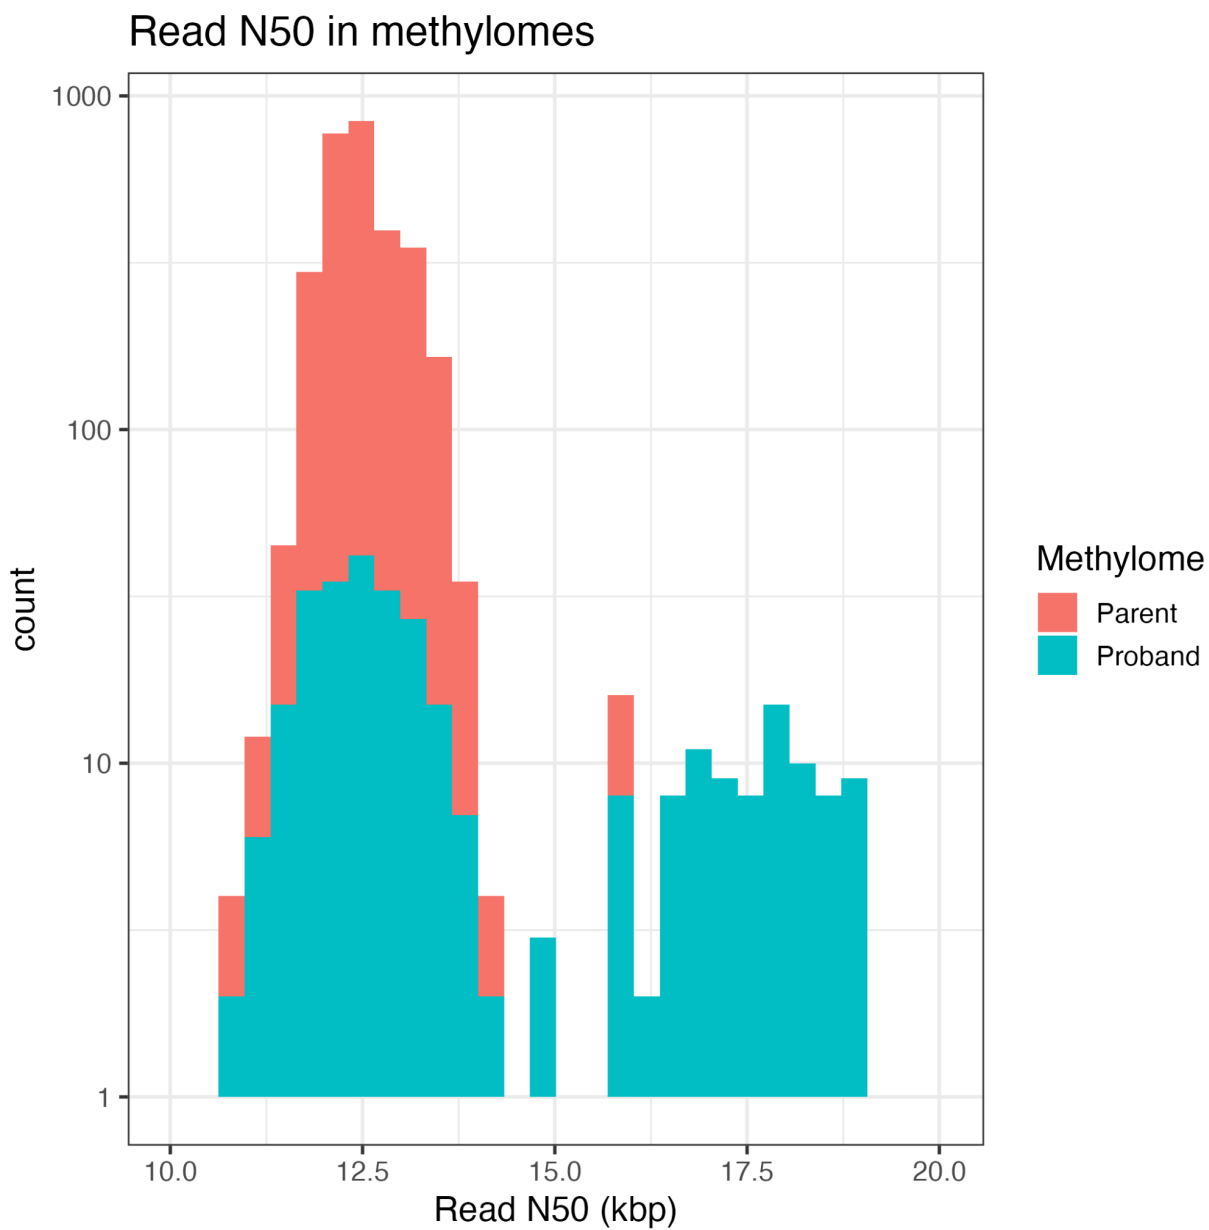

Fig S4: Read N50 distribution of the 435 GA4K methylomes that were mapped to the GA4K pangenome with minigraph.

## Unmethylated CpGs among rare and common CpGs

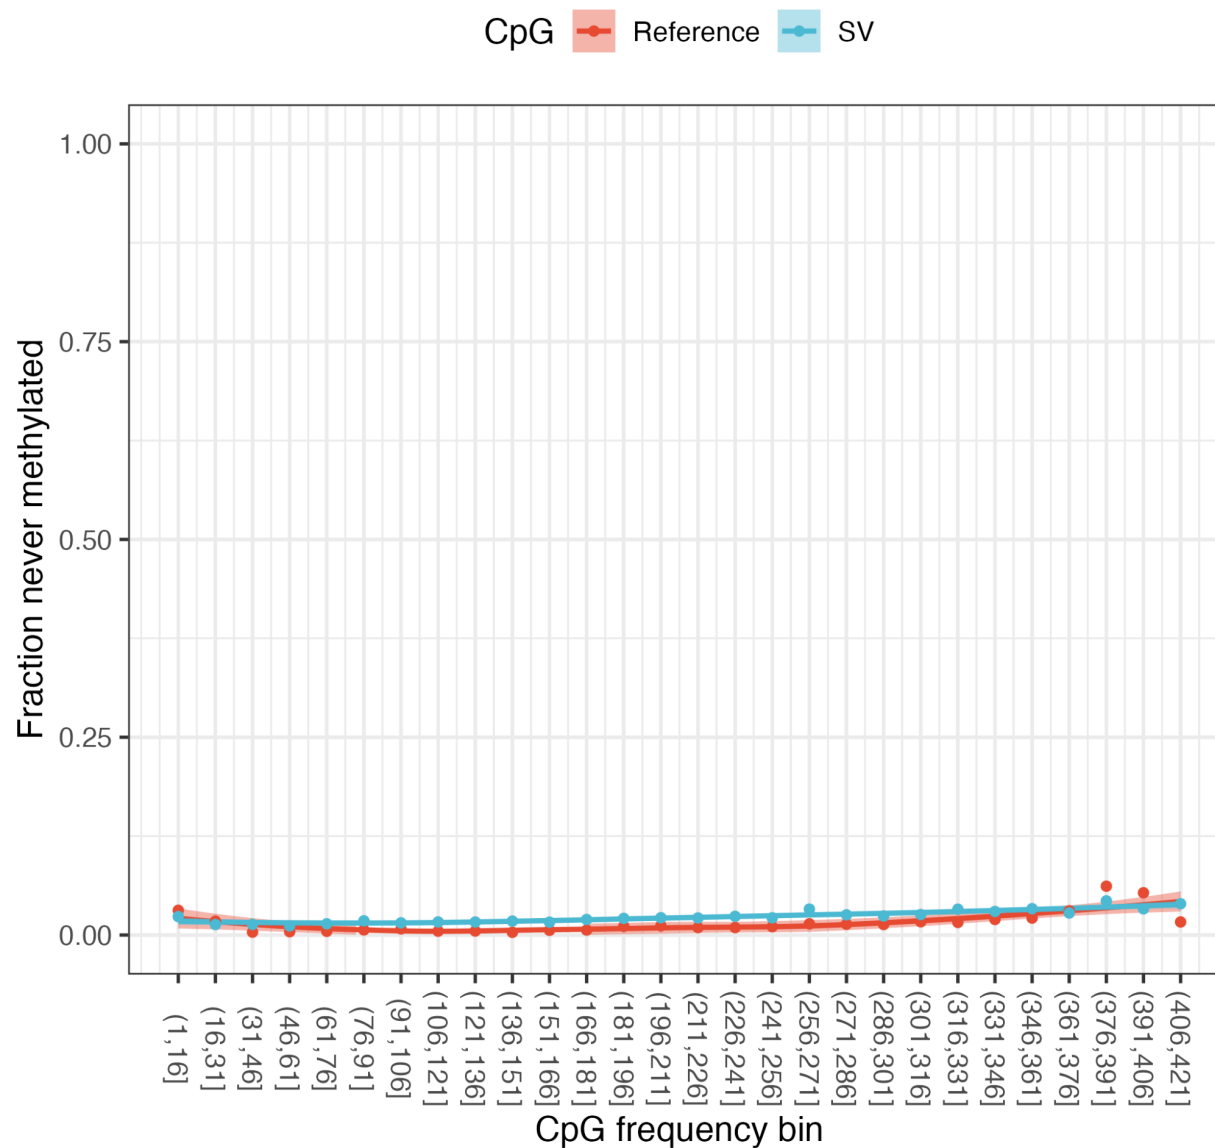

Fig S5: Proportion of CpGs that are never observed in a methylated state, stratified by the CpG frequency, and by SV-CpGs and reference CpGs. Error bands represent the 95% confidence interval as estimated by the loess regression fitted to the points.

# Methylation in imprinting control regions (ICRs) Relative to least methylated haplotype

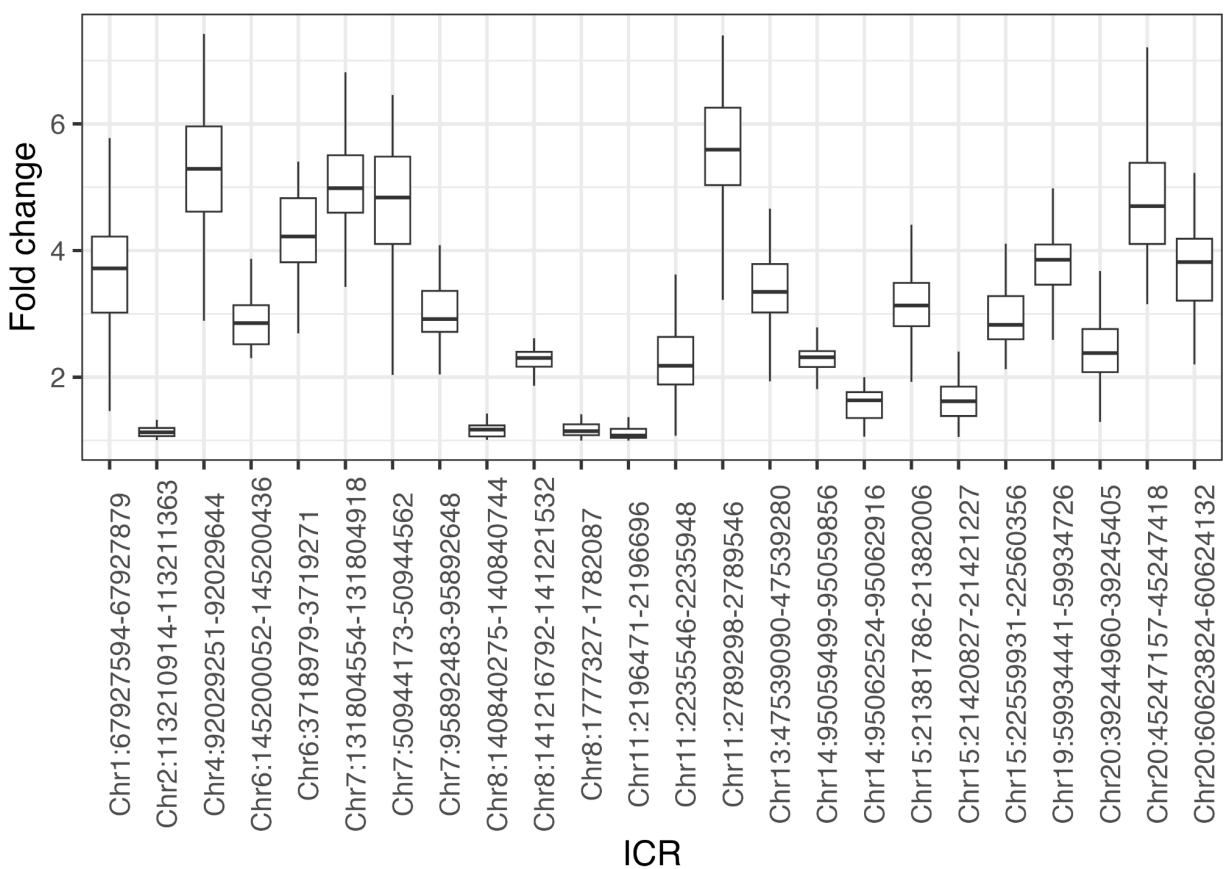

Fig S6: Methylation differences in imprinting control regions observed between the two haplotypes in methylomes as measured by panmethyl in the GA4K pangenome.

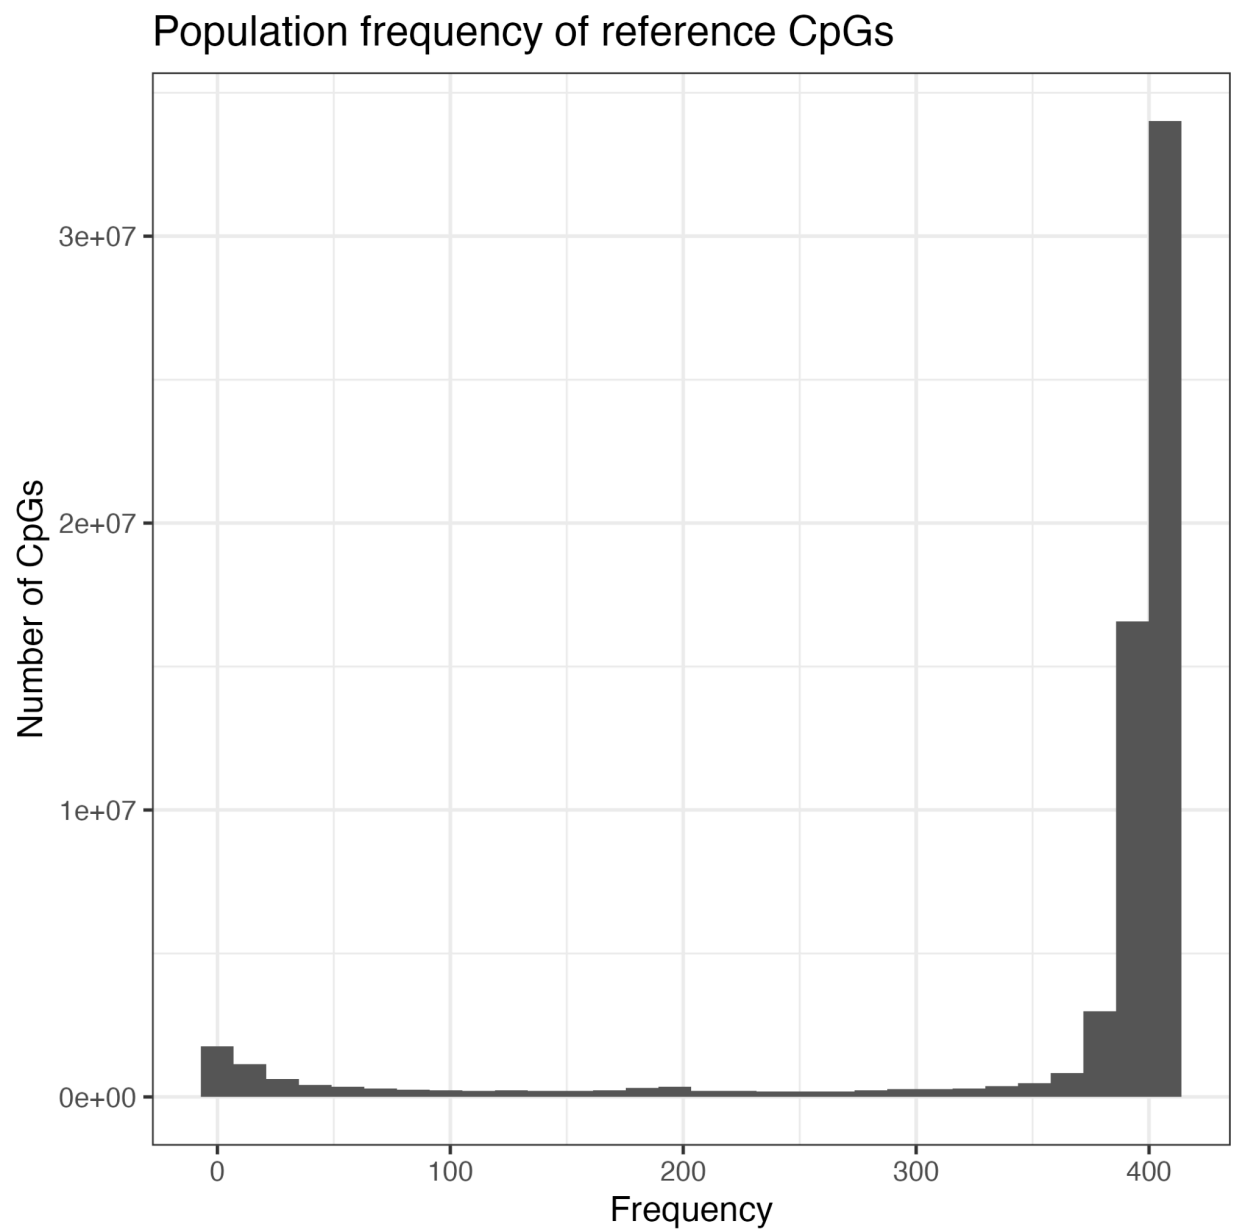

Fig S7: Population frequency of reference CpGs in the 435 GA4K methylomes.

## Methylation rate among rare and common CpGs

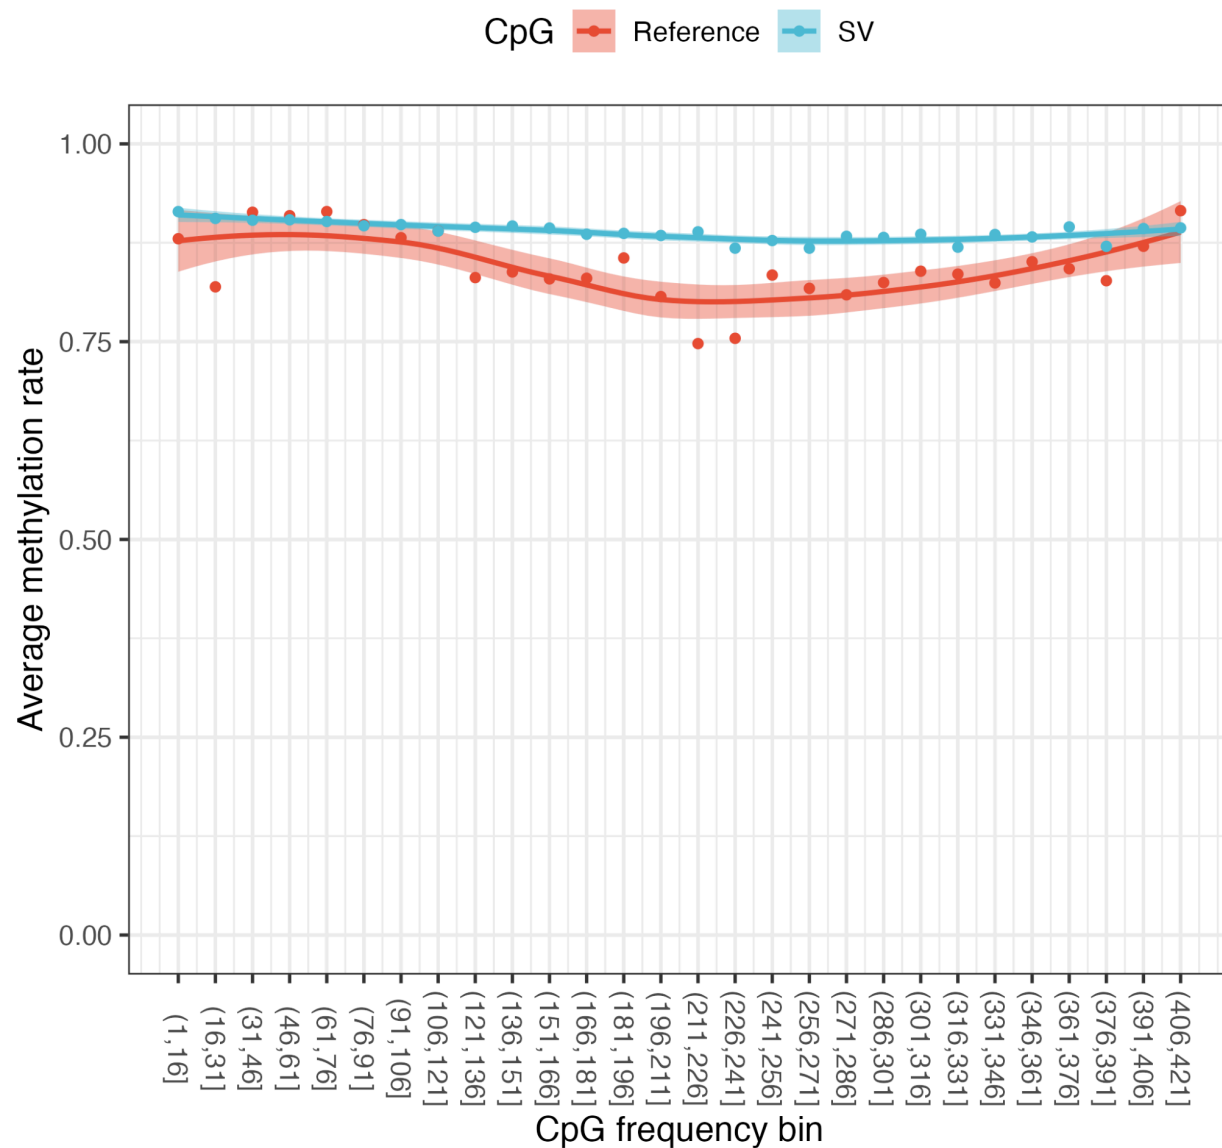

Fig S8: Mean methylation rate of SV and reference CpGs across frequency bins. Error bands represent the 95% confidence interval as estimated by the loess regression fitted to the points.



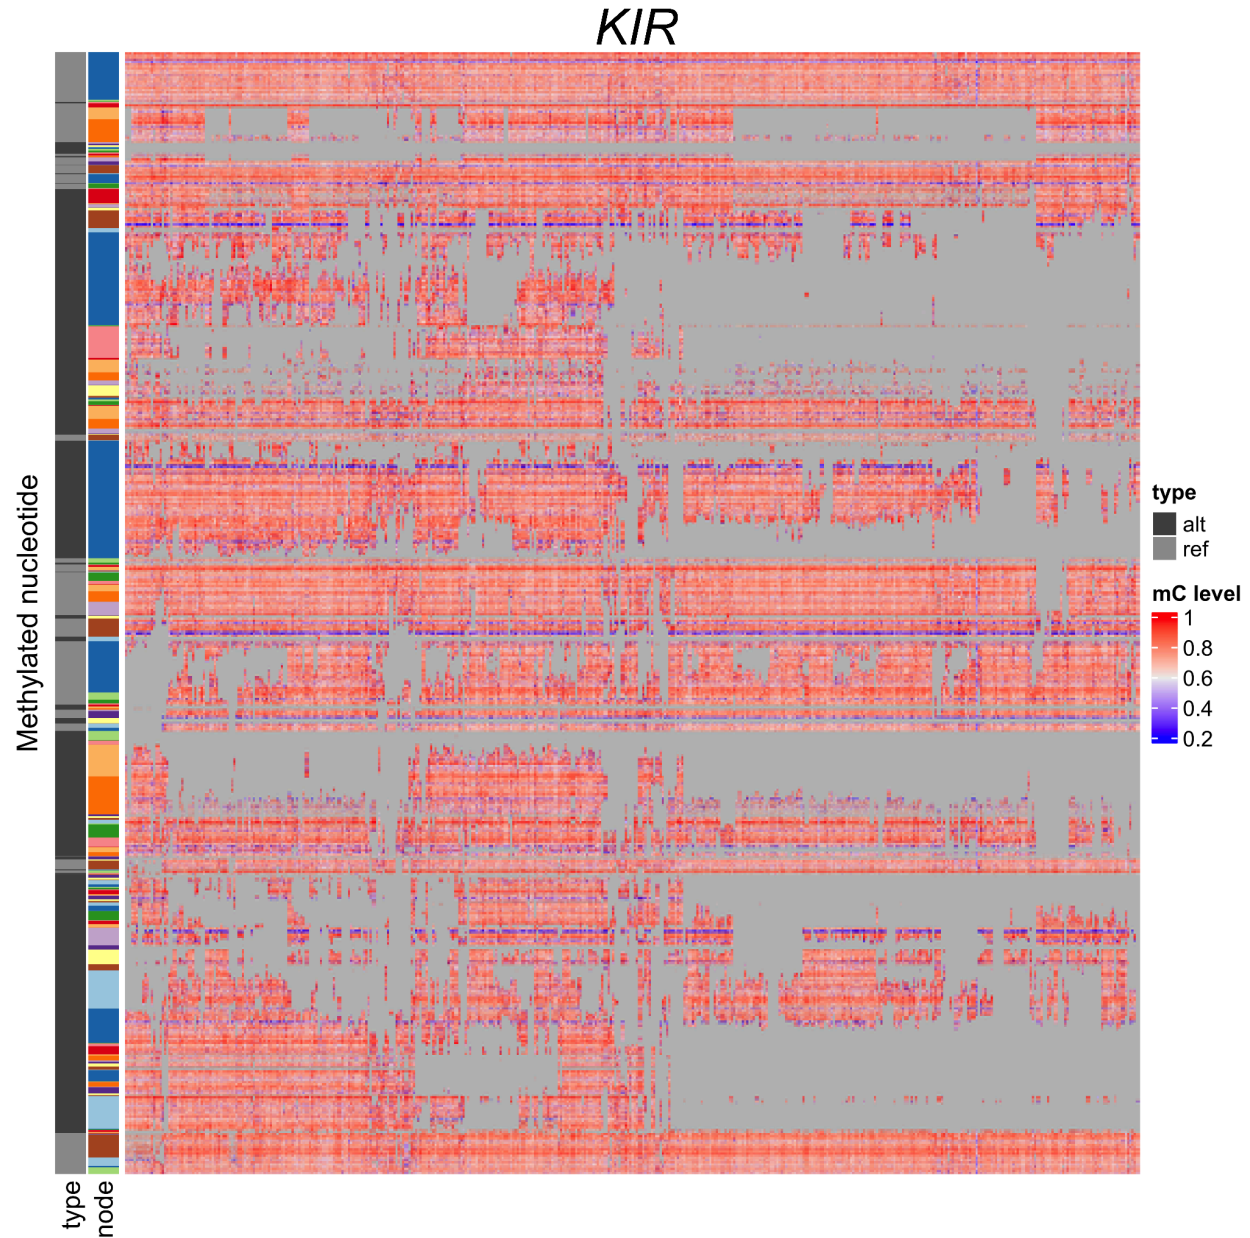

Fig S9: Heatmap visualization of methylation patterns in the *KIR* locus across 435 methylomes in the GA4K pangenome. Rows are CpGs and columns are methylomes. CpGs are ordered top to bottom, in the 5' to 3' direction as they appear in a haplotype, and are annotated by the node in the graph (the node row annotation) and whether it's a reference or non-reference CpG (the type row annotation, alt or ref).

# Methylation rate across repeats In small families with less than 10,000 CpGs

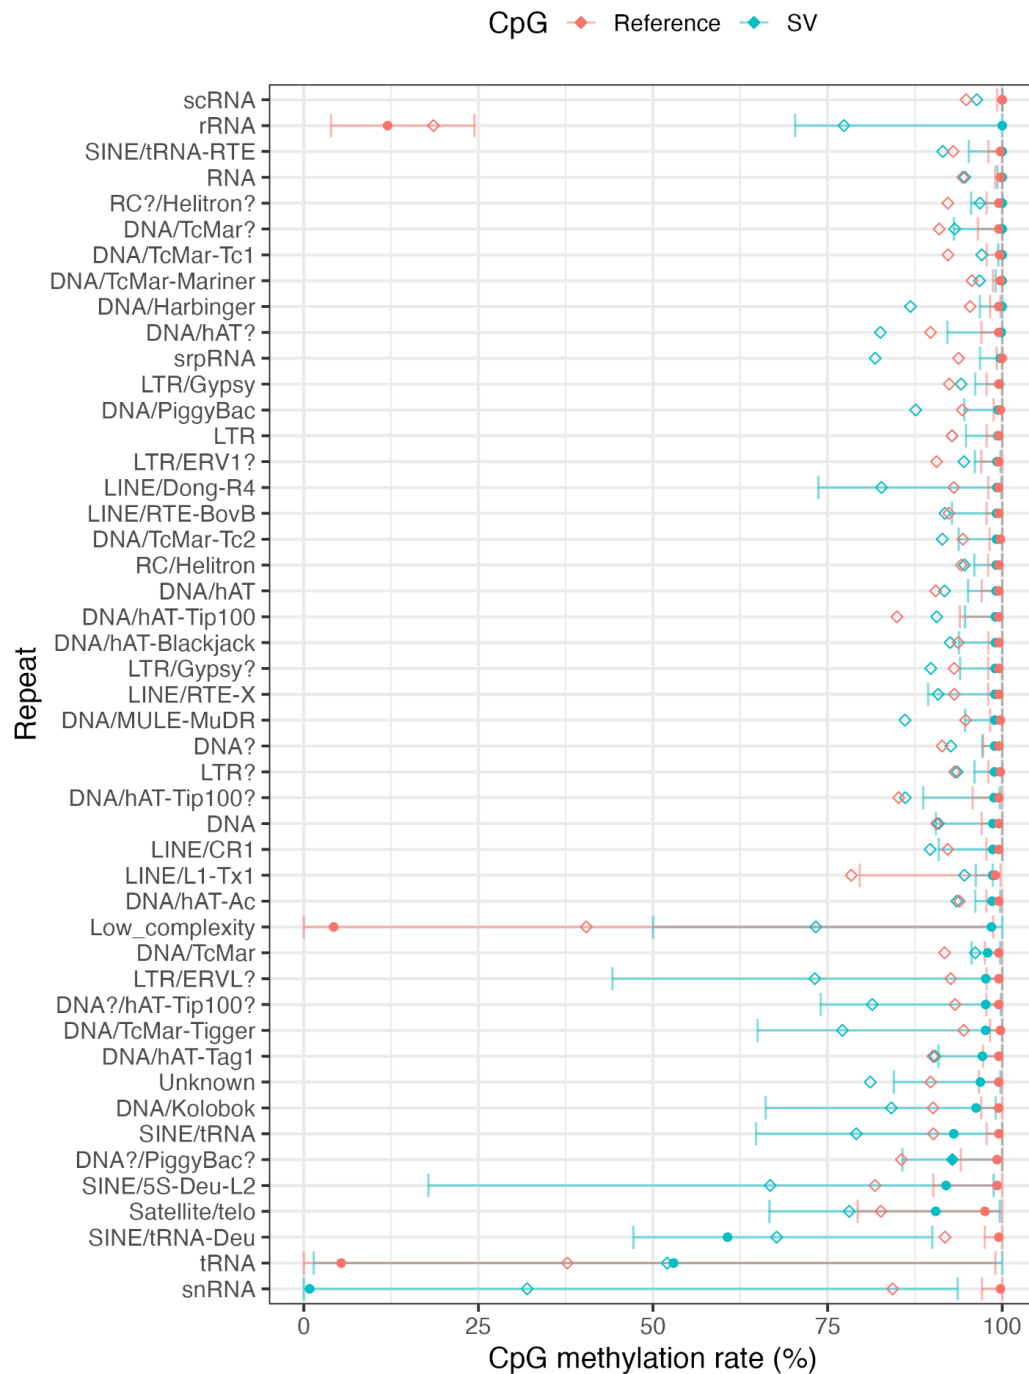

Fig S10: The observed methylation rates of CpGs in repeat families not shown in Fig 3D. Intervals denote the 25%, 50% (median, dot), and the 75% quantiles. The rhombi denote the means of the distributions.

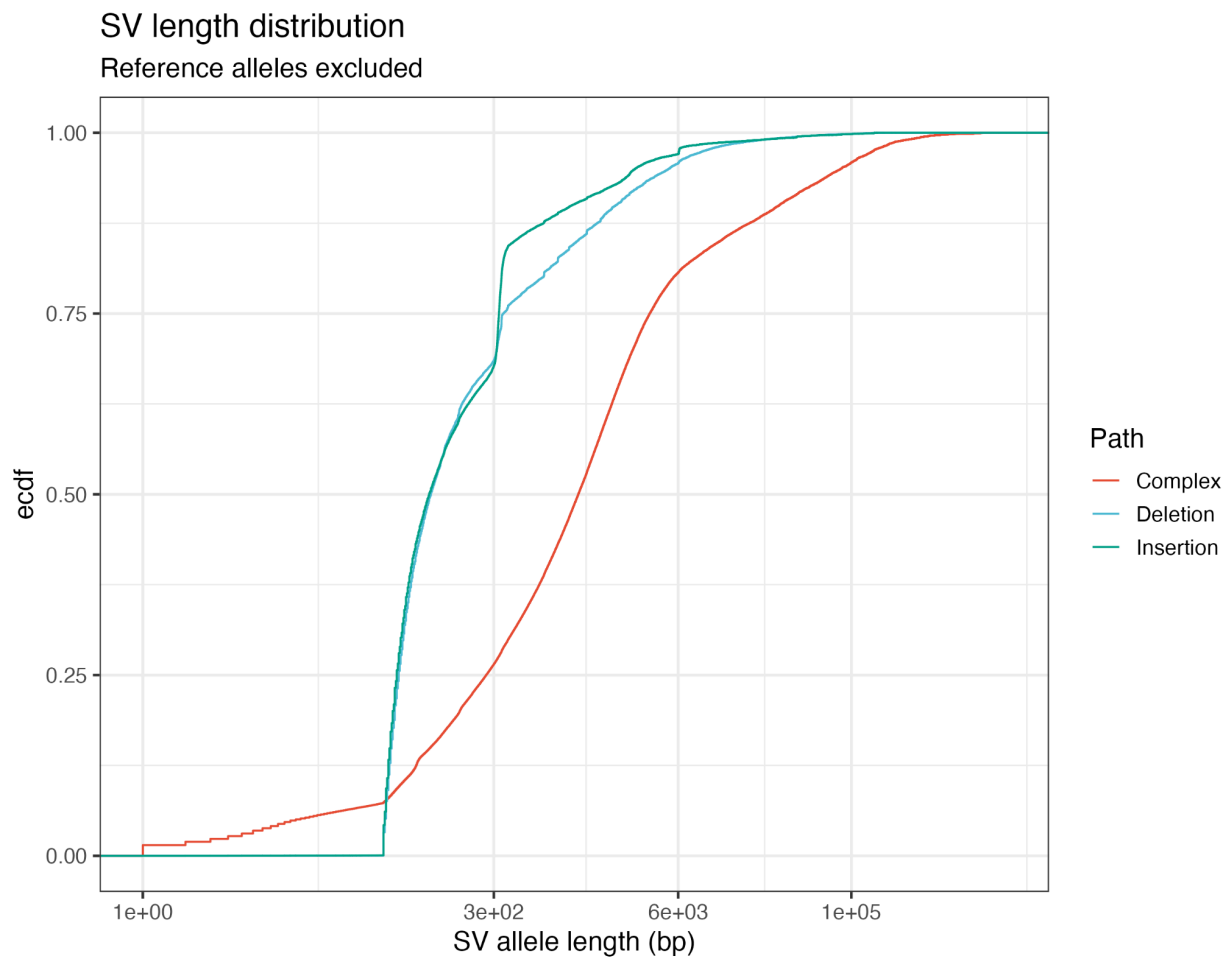

Fig S11: SV allele length distribution in the GA4K pangenome, stratified by insertions, deletions and complex SVs. Complex SVs are sequences that cannot be described by a single insertion, deletion or substitution event. These usually happen in loci where SVs from multiple genomes merge into bubbles, such as STRs or VNTRs.

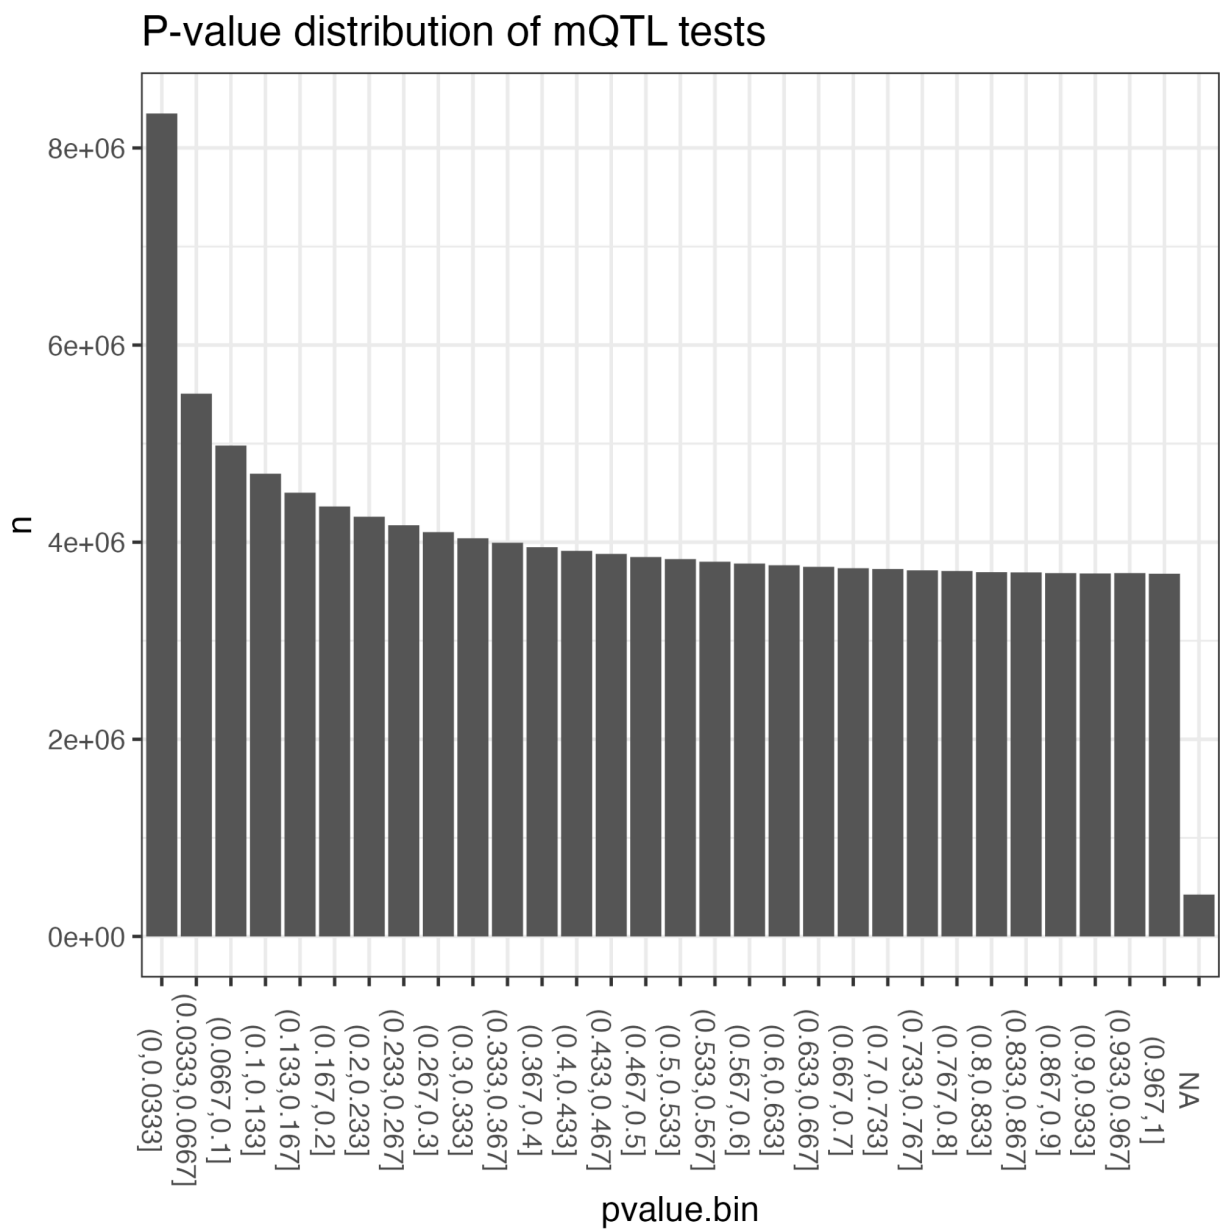

Fig S12: P-value distribution of SV-mQTL tests. NA p-values are tests where almost all samples had missing data.

Distance between methylation bins and SVs-QTLs  
With Bonferroni correction,  $\min(\text{adj.pvalue}) < 0.05$

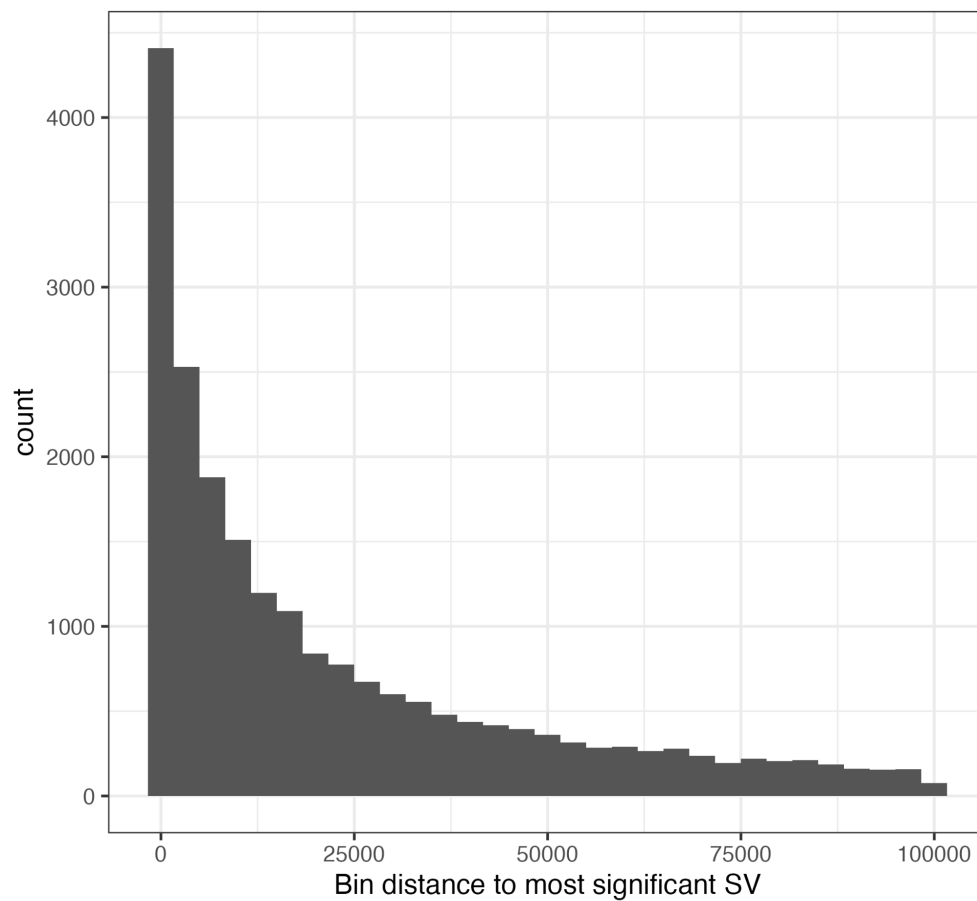

Figure S13: Range of statistical significant interactions between methylation bins and SV-mQTLs, corrected for multiple testing with the Bonferroni method.

SV-mQTLs relative to dosage sensitive regions  
As annotated in ClinGen

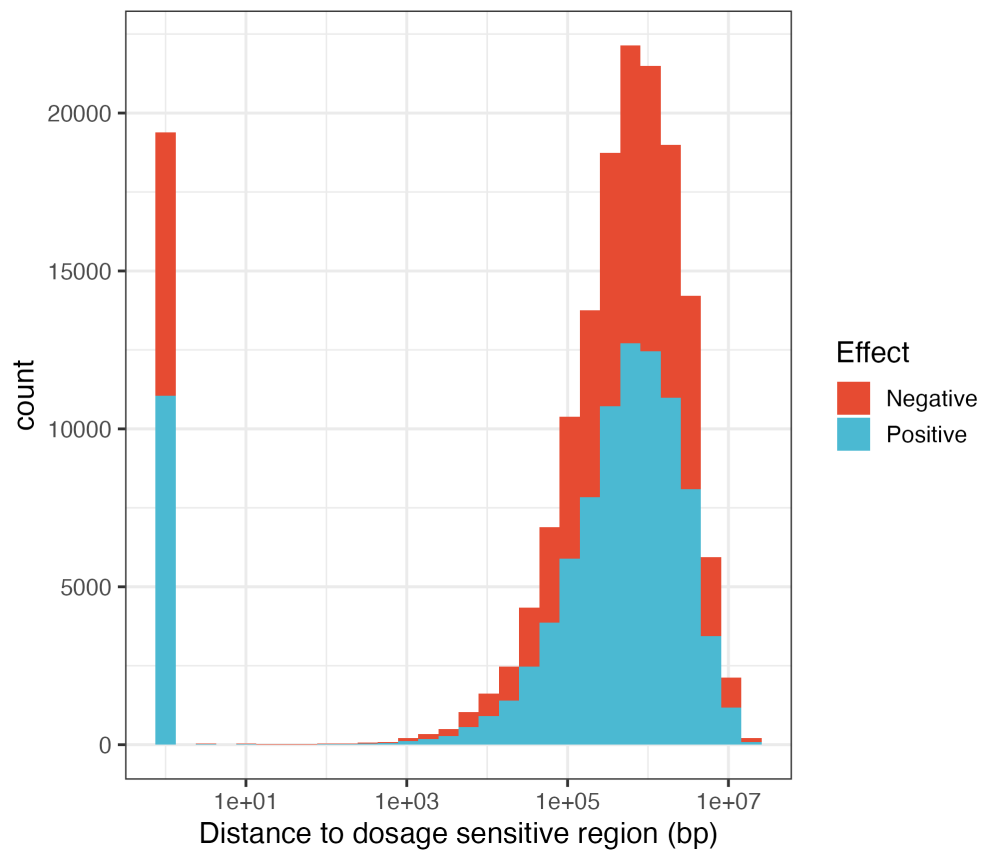

Fig S14: Distribution of SV-mQTLs relative to dosage sensitive regions in ClinGen. Alleles with both positive and negative effects are counted twice.

### Example SV-mQTLs in dosage sensitive genes

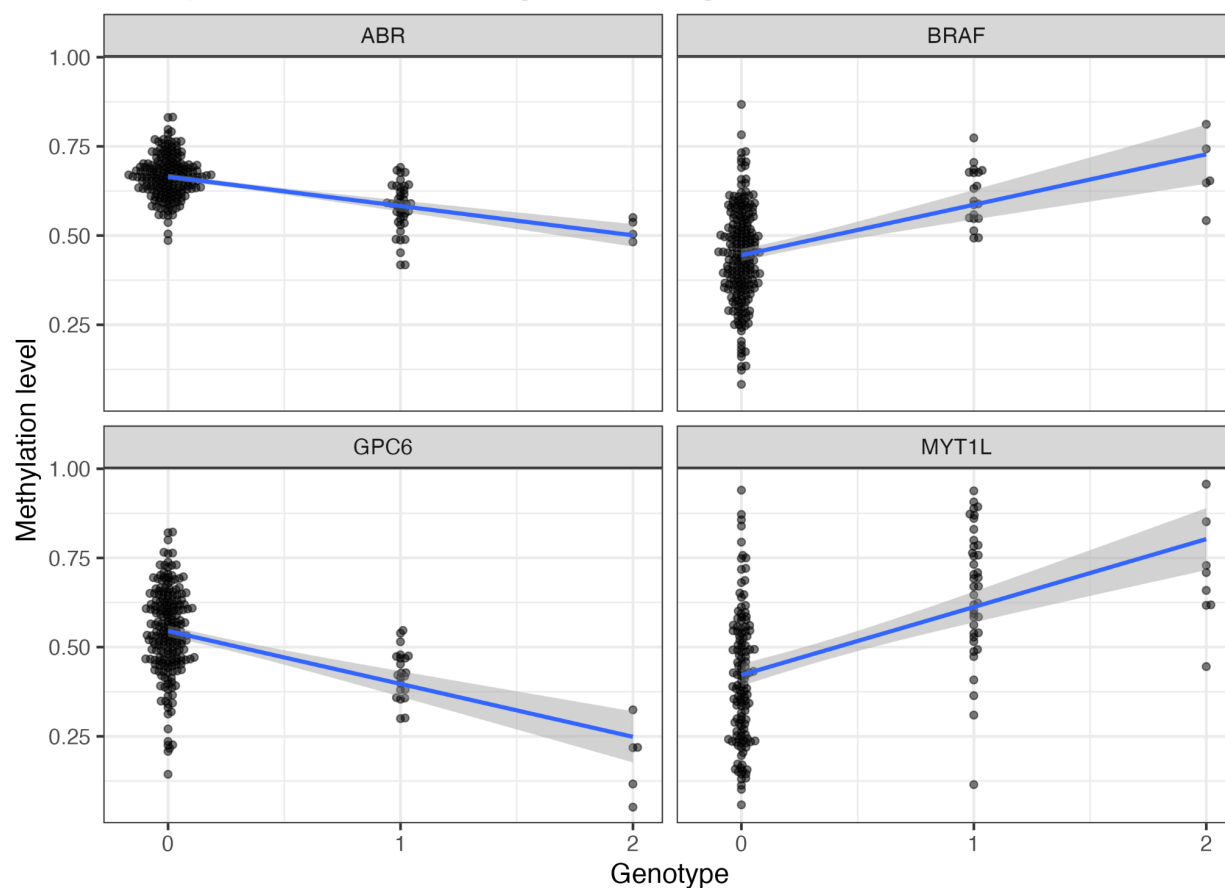

Fig S15: Example methylation bins within four dosage sensitive genes. The involved bins are Chr17:1047600-1047799 (*ABR*), Chr7:142218400-142218599 (*BRAF*), Chr13:92714600-92714799 (*GPC6*), Chr2:1805800-1805999 (*MYT1L*). The involved SVs are Chr17:1045448-1047678 (*ABR*), Chr7:142222985-142223202 (*BRAF*), Chr13:92714752-92714907 (*GPC6*), Chr2:1805709-1806032 (*MYT1L*).

# Mean methylation rate In CpGs of SV-QTL alleles

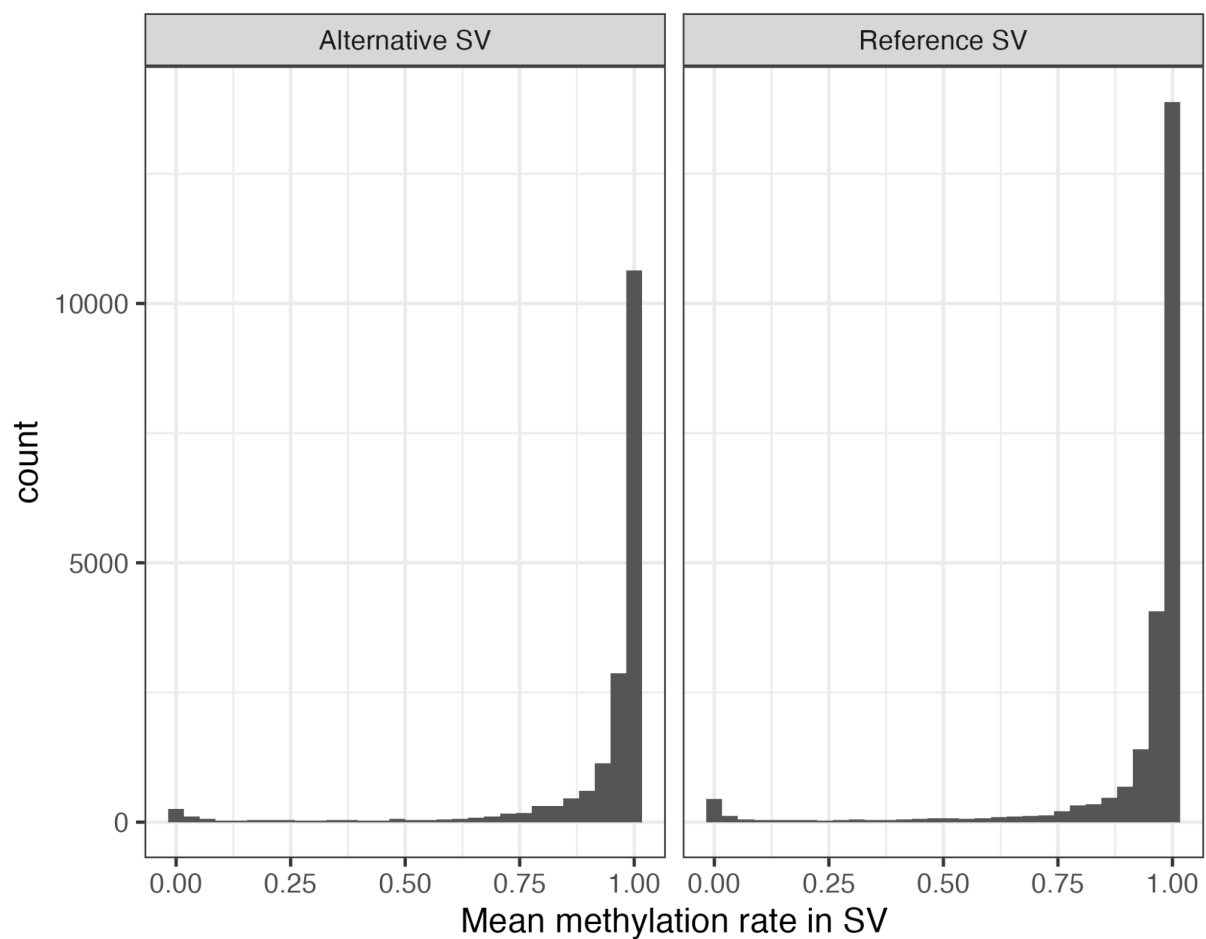

Fig S16: Average methylation rate of CpGs in SVs that are QTL for methylation, stratified by reference and non-reference SV alleles.



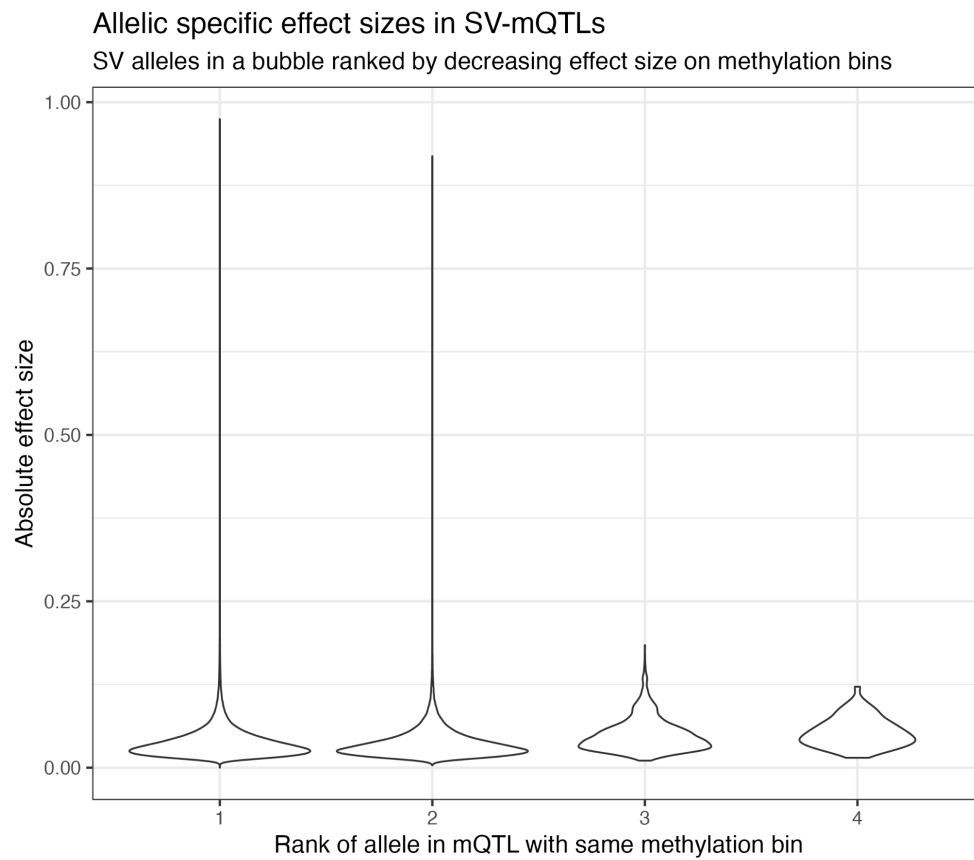

Fig S17: Distribution of allelic specific effect sizes in mQTLs. For each methylation bin and multi-allelic bubble, we rank the SV alleles in the bubble in decreasing order of effect size on the methylation bin. Then, we plot the distribution of effect sizes at each rank.

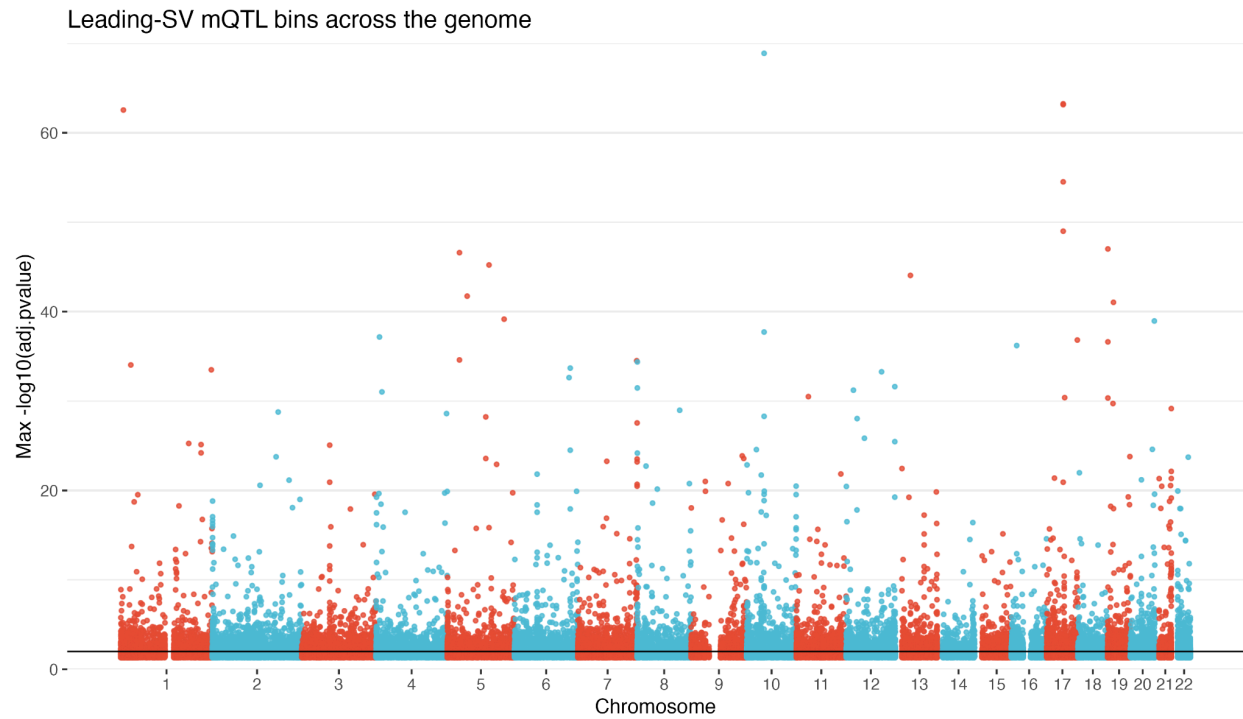

Fig S18: Manhattan plot of QTL methylation bins associated with a leading SV that surpasses nearby SNPs at FDR < 0.05 over the entire reference genome backbone.

# Distance distributions in SNP-QTLs and SV-QTLs

FDR < 0.05

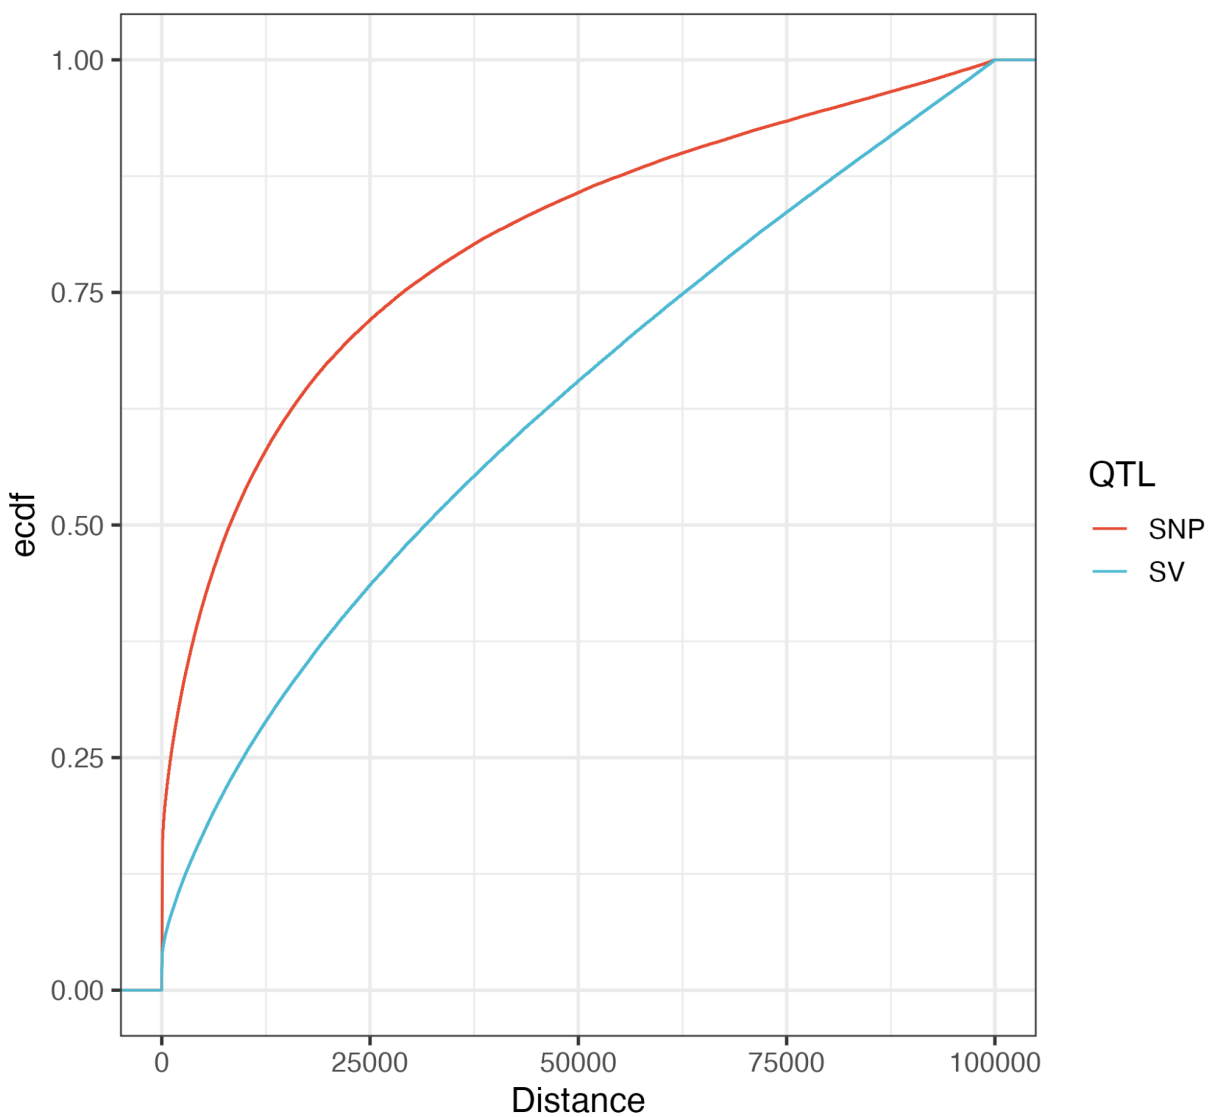

Fig S19: The distribution of distances between SV-mQTLs, SNP-QTLs and their methylation bins.

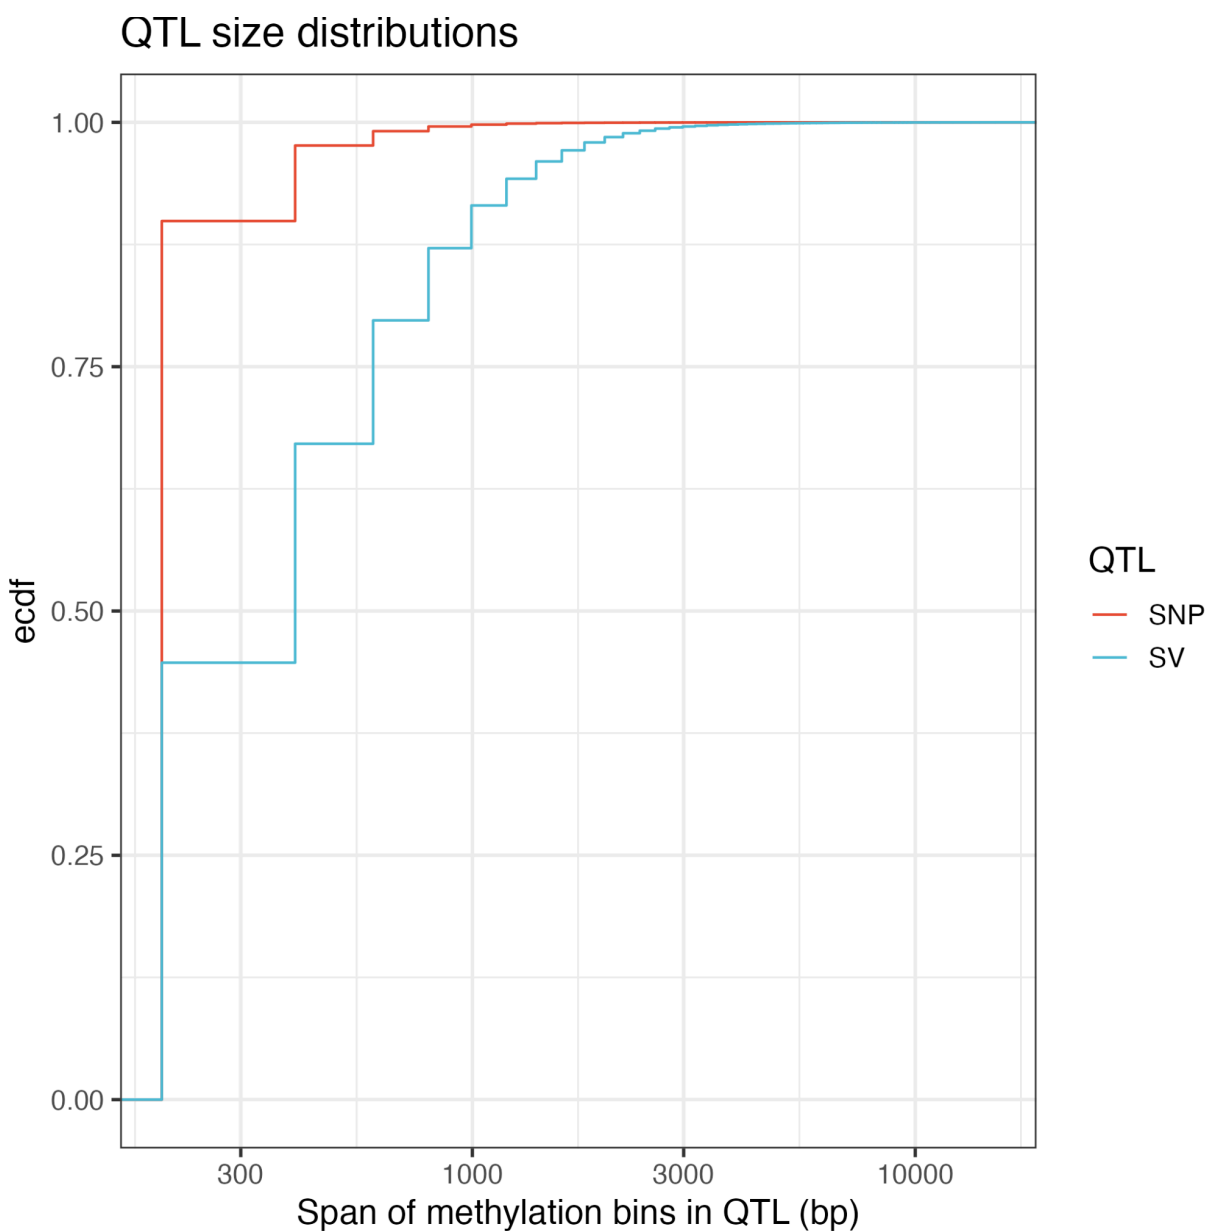

Fig S20: Distribution of the number of methylation bins (in bp) that are in QTL (FDR < 0.05) with each SV and each SNP.

## Repeats associated with SV-QTL alleles

Stratified by reference allele

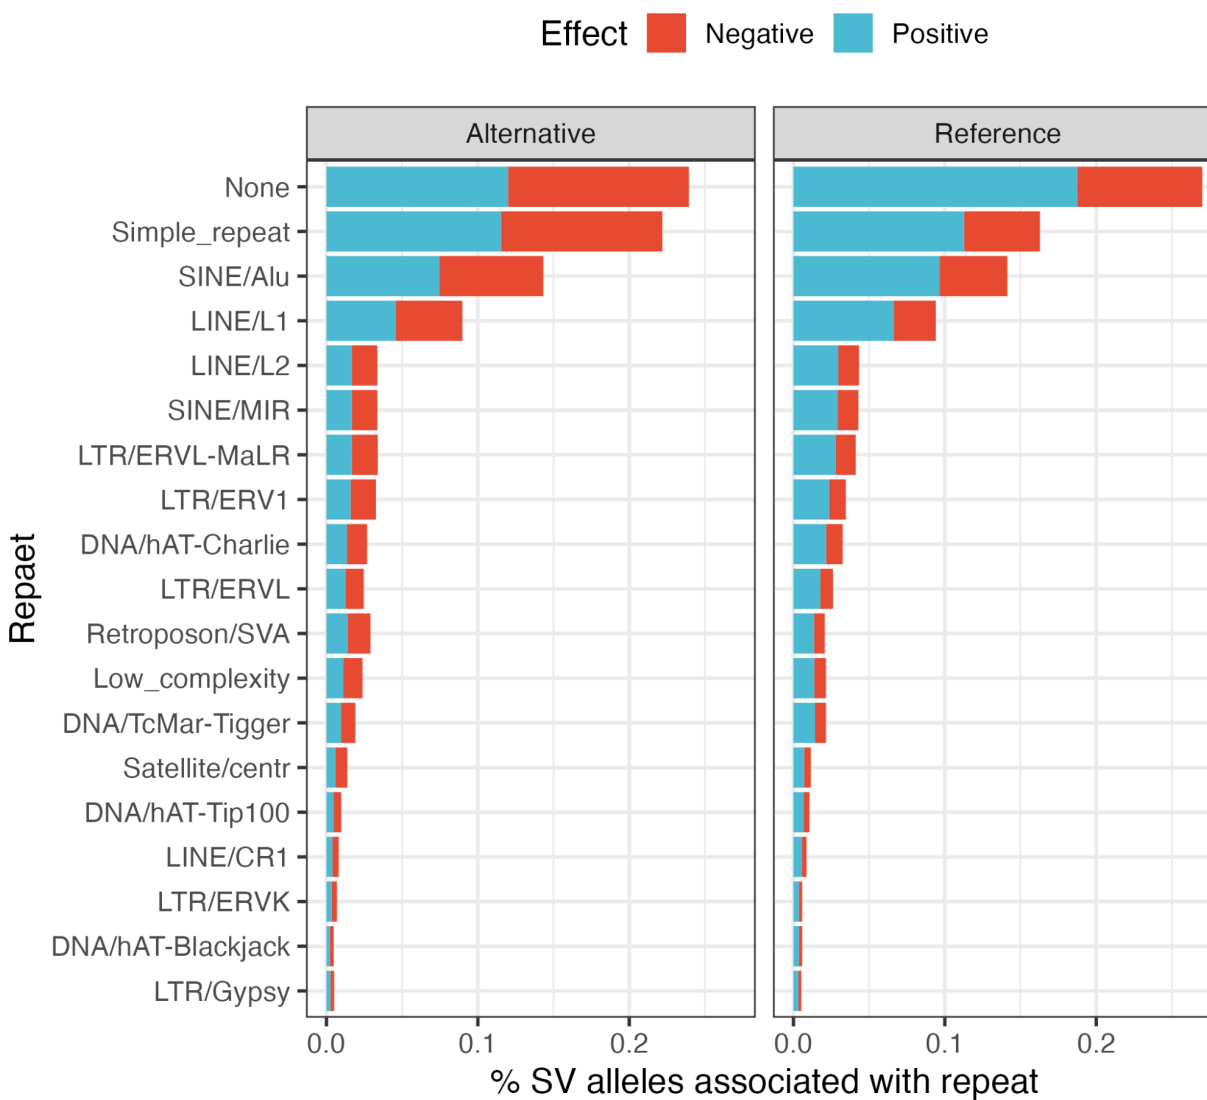

Fig S21: Repeat annotation of SV-QTL alleles, stratified by reference and non-reference SV alleles, and the direction of the effect of methylation.

Table S1: t-tests involving the rate of discovering new SV-CpGs, SV-5mCpGs, reference CpGs and reference 5mCpGs. The standard deviations are estimated from 10 random permutations of the order of genomes in Fig 1B.

| Rate A         | Rate B           | Mean rate A | Mean rate B | Standard deviation A | Standard deviation B | p-value |
|----------------|------------------|-------------|-------------|----------------------|----------------------|---------|
| SV-CpGs        | Reference CpGs   | 2758        | 615         | 2680                 | 594                  | 0.0334  |
| SV-CpGs        | SV-5mCpG         | 2758        | 2053        | 2680                 | 2397                 | 0.5431  |
| Reference CpGs | Reference 5mCpGs | 615         | 1535        | 594                  | 1208                 | 0.0498  |

Table S2: Mann Whitney *U* testing of differences in methylation rates between SV-CpGs and reference CpGs in each repeat family.

| statistic      | p.value        | repeat           | adj.p.value    | statistic | p.value        | repeat          | adj.p.value    |
|----------------|----------------|------------------|----------------|-----------|----------------|-----------------|----------------|
| 57286567338873 | <2.225074e-308 | None             | <2.225074e-308 | 56314     | 3.39E-04       | DNA/hAT-Tip100? | 5.84E-04       |
| 9510935047     | 5.24E-18       | DNA/hAT-Charlie  | 1.41E-17       | 12170354  | 1.20E-08       | LTR/Gypsy?      | 2.57E-08       |
| 2962406132     | <2.225074e-308 | DNA/TcMar-Tigger | <2.225074e-308 | 2171472   | 4.48E-04       | DNA             | 7.51E-04       |
| 1093369350894  | <2.225074e-308 | Simple_repeat    | <2.225074e-308 | 9371612.5 | 0.1839913762   | LTR             | 0.2236757907   |
| 1115255185920  | <2.225074e-308 | LINE/L1          | <2.225074e-308 | 4560901   | 0.04970469719  | DNA/hAT         | 0.06556789843  |
| 8212186720795  | <2.225074e-308 | SINE/Alu         | <2.225074e-308 | 525552    | 0.05771781786  | LTR/ERV1?       | 0.07303070831  |
| 68914462.5     | 0.3627159072   | LTR/Gypsy        | 0.4015783259   | 1234778   | 0.3573041794   | SINE/tRNA-RTE   | 0.4015783259   |
| 23573998295    | <2.225074e-308 | LINE/L2          | <2.225074e-308 | 2290940   | 1.37E-221      | snRNA           | 6.55E-221      |
| 12454902318    | 2.33E-122      | SINE/MIR         | 9.03E-122      | 581212    | 9.18E-04       | DNA/PiggyBac    | 0.001498329329 |
| 177325565      | 1.94E-47       | LINE/CR1         | 6.34E-47       | 437591    | 0.006223109941 | DNA/hAT-Tag1    | 0.009410556496 |
| 57481909943    | <2.225074e-308 | Retroposon/SVA   | <2.225074e-308 | 245768    | 0.0559357693   | RC/Helitron     | 0.07225036869  |

|               |                |                   |                |            |                |                 |                |
|---------------|----------------|-------------------|----------------|------------|----------------|-----------------|----------------|
| 42488594204   | 0.2437992524   | LTR/ERV1-MaLR     | 0.2851991255   | 1068633    | 0.02374337613  | LINE/RTE-BovB   | 0.032713096    |
| 42776042.5    | 1.71E-16       | LINE/RTE-X        | 4.42E-16       | 801997.5   | 7.59E-09       | RNA             | 1.68E-08       |
| 1237425758927 | <2.225074e-308 | Satellite/centr   | <2.225074e-308 | 1452569817 | <2.225074e-308 | rRNA            | <2.225074e-308 |
| 1306603720    | <2.225074e-308 | Low_complexity    | <2.225074e-308 | 256318     | 1.57E-06       | DNA/hAT-Ac      | 3.03E-06       |
| 70276249881   | <2.225074e-308 | LTR/ERV1          | <2.225074e-308 | 13846      | 0.1992345487   | LINE/Dong-R4    | 0.2375488849   |
| 18586158681   | 2.03E-275      | LTR/ERV1          | 1.05E-274      | 513178     | 0.001259019626 | DNA/hAT-Tip100? | 0.00200151838  |
| 102187748108  | 7.27E-27       | Satellite         | 2.15E-26       | 891960     | 0.1029223885   | DNA?            | 0.1276237617   |
| 13464712      | 5.70E-77       | tRNA              | 1.96E-76       | 98678      | 0.5448178204   | DNA/hAT?        | 0.5537492601   |
| 2413777282    | 1.02E-215      | LTR/ERV1          | 4.52E-215      | 281462     | 9.03E-05       | DNA/TcMar       | 1.60E-04       |
| 393870442.5   | 2.87E-16       | Satellite/acro    | 7.13E-16       | 654515     | 2.65E-06       | DNA/MULE-MuDR   | 4.98E-06       |
| 2950          | 0.3814289631   | DNA/Kolobok       | 0.4148876441   | 30805      | 0.002657287909 | SINE/tRNA       | 0.004118796259 |
| 145481947     | 4.94E-116      | Satellite/telo    | 1.80E-115      | 920144     | 6.95E-08       | snpRNA          | 1.39E-07       |
| 14301101      | 5.52E-08       | DNA/hAT-Blackjack | 1.14E-07       | 27050      | 0.01299233485  | SINE/5S-Deu-L2  | 0.01917916096  |
| 3471823.5     | 2.58E-23       | scRNA             | 7.26E-23       | 904        | 0.02266036194  | SINE/tRNA-Deu   | 0.03193051001  |
| 10838476      | 3.85E-11       | LTR?              | 9.17E-11       | 1402       | 0.8812534885   | DNA?/PiggyBac?  | 0.8812534885   |
| 237286530     | 0.3987371374   | DNA/hAT-Tip100    | 0.4262362504   | 6766       | 0.321598534    | DNA/TcMar?      | 0.3692427612   |
| 3074393       | 4.29E-28       | LTR/ERV1?         | 1.33E-27       | 19885      | 0.04186459267  | DNA/TcMar-Tc1   | 0.05642619012  |
| 4717742       | 8.23E-06       | DNA/TcMar-Tc2     | 1.50E-05       | 10696      | 0.40737546     | RC?/Helitron?   | 0.4280894664   |
| 1799572       | 2.78E-10       | Unknown           | 6.39E-10       | 4438       | 0.4627516554   | LINE/L1-Tx1     | 0.4781767106   |
| 162903338     | 3.53E-167      | DNA/TcMar-Mariner | 1.46E-166      | 6138       | 0.01807889122  | DNA/Harbinger   | 0.0260672385   |

Table S3: Number of tested SNPs and SVs, the number of SNPs and SVs that were a statistically significant QTL, and the number of SNPs and SVs that were the leading QTL variant. For SVs, we give the number of alleles and loci, since some SVs are multi-allelic.

| Variants | Tested alleles                 | QTL (FDR <0.05)               | Leading QTL                   |
|----------|--------------------------------|-------------------------------|-------------------------------|
| SVs      | 160,064 alleles<br>97,746 loci | 76,677 alleles<br>59,872 loci | 32,947 alleles<br>31,312 loci |
| SNPs     | 5,617,307                      | 156,047                       | 145,453                       |
