# Supplementary material for: Expanded methylome and quantitative trait loci detection by long-read profiling of personal DNA
Source: HighWire-hosted journal article supplement (doi:10.1101/gr.279240.124), 2025-03-20
Supplement: Supplemental_Table_S4.xlsx [file Supplemental_Table_S4.xlsx]

## Sheet: Table S4
#bin_chrom	bin_start	bin_end	sv_chrom	sv_start	sv_end	allele	beta.sv	adj.p.value.sv	snp_chrom	snp_pos	beta.snp	adj.p.value.snp	rs_GRCh38	gwasRs	distance	R2	gwasPos	gene
6	149980257	149980456	6	149981527	149981673	*	-0.0844614	2.06395e-34	6	149981212	-0.08326	1.2818e-28	rs4869780	rs1853665	3506	0.964	149977706	ULBP1
6	149980257	149980456	6	149981527	149981673	*	-0.0844614	2.06395e-34	6	149981212	-0.08326	1.2818e-28	rs4869780	rs1853665	3506	0.964	149977706	ULBP2
12	95842584	95842783	12	95842558	95842558	>s676869>s676870>s676871>s676872>s676873>s676874>s676875>s676876	-0.107304	5.35918e-34	12	95811383	-0.09703	4.80195e-32	rs4762626	rs7307510	32409	0.999	95843792	SNRPF
12	95842584	95842783	12	95842558	95842558	>s676869>s676870>s676871>s676872>s676873>s676874>s676875>s676876	-0.107304	5.35918e-34	12	95811383	-0.09703	4.80195e-32	rs4762626	rs7970544	36948	0.998	95848331	NA
12	95842584	95842783	12	95842558	95842558	>s676869>s676870>s676871>s676872>s676873>s676874>s676875>s676876	-0.107304	5.35918e-34	12	95811383	-0.09703	4.80195e-32	rs4762626	rs7970544	36948	0.998	95848331	SNRPF
12	95842584	95842783	12	95842558	95842558	>s676869>s676870>s676871>s676872>s676873>s676874>s676875>s676876	-0.107304	5.35918e-34	12	95811383	-0.09703	4.80195e-32	rs4762626	rs7970544	36948	0.998	95848331	SNRPF
6	149981859	149982058	6	149981527	149981673	*	-0.0893879	3.15551e-25	6	149978163	-0.08872	5.41808e-21	rs9383993	rs1853665	457	0.995	149977706	ULBP1
6	149981859	149982058	6	149981527	149981673	*	-0.0893879	3.15551e-25	6	149978163	-0.08872	5.41808e-21	rs9383993	rs1853665	457	0.995	149977706	ULBP2
6	149981859	149982058	6	149981527	149981673	*	-0.0893879	3.15551e-25	6	149978163	-0.08872	5.41808e-21	rs9383993	rs4869780	3049	0.964	149981212	NA
6	149981859	149982058	6	149981527	149981673	*	-0.0893879	3.15551e-25	6	149978163	-0.08872	5.41808e-21	rs9383993	rs4869780	3049	0.964	149981212	NA
6	149981859	149982058	6	149981527	149981673	*	-0.0893879	3.15551e-25	6	149978163	-0.08872	5.41808e-21	rs9383993	rs4869780	3049	0.964	149981212	NA
6	166960043	166960242	6	166955334	166955405	>s190348	0.0776198	1.24313e-20	6	166970262	-0.0761	1.78886e-16	rs364283	rs385863	2865	1	166973127	NA
6	166960043	166960242	6	166955334	166955405	>s190348	0.0776198	1.24313e-20	6	166970262	-0.0761	1.78886e-16	rs364283	rs9457247	8424	1	166978686	NR
6	166960043	166960242	6	166955334	166955405	>s190348	0.0776198	1.24313e-20	6	166970262	-0.0761	1.78886e-16	rs364283	rs415890	22883	0.992	166993145	CCR6
21	17718377	17718576	21	17720360	17720529	>s600835>s600836>s600837>s600838>s600839<s723361>s600851	0.110725	1.01396e-18	21	17718086	0.1097	1.43141e-14	rs11910414	rs2824459	17780	0.969	17700306	C21orf91
21	17718377	17718576	21	17720360	17720529	>s600835>s600836>s600837>s600838>s600839<s723361>s600851	0.110725	1.01396e-18	21	17718086	0.1097	1.43141e-14	rs11910414	rs2824459	17780	0.969	17700306	C21orf91
21	17718377	17718576	21	17720360	17720529	>s600835>s600836>s600837>s600838>s600839<s723361>s600851	0.110725	1.01396e-18	21	17718086	0.1097	1.43141e-14	rs11910414	rs2824459	17780	0.969	17700306	C21orf91
6	149982059	149982258	6	149981527	149981673	*	-0.103505	1.16683e-18	6	149981212	-0.1031	1.82942e-15	rs4869780	rs1853665	3506	0.964	149977706	ULBP1
6	149982059	149982258	6	149981527	149981673	*	-0.103505	1.16683e-18	6	149981212	-0.1031	1.82942e-15	rs4869780	rs1853665	3506	0.964	149977706	ULBP2
6	149982059	149982258	6	149981527	149981673	*	-0.103505	1.16683e-18	6	149981212	-0.1031	1.82942e-15	rs4869780	rs4869780	0	1	149981212	NA
6	149982059	149982258	6	149981527	149981673	*	-0.103505	1.16683e-18	6	149981212	-0.1031	1.82942e-15	rs4869780	rs4869780	0	1	149981212	NA
6	149982059	149982258	6	149981527	149981673	*	-0.103505	1.16683e-18	6	149981212	-0.1031	1.82942e-15	rs4869780	rs4869780	0	1	149981212	NA
1	222090180	222090368	1	222090176	222090180	*	0.0489251	1.75154e-17	1	222077747	0.04731	1.08756e-11	rs10863683	rs10863683	0	1	222077747	NA
1	247937162	247937262	1	247937155	247937155	>s864301	0.225802	1.82387e-16	1	247845366	0.1672	6.69987e-07	rs6690724	rs12087575	1632	0.98	247846998	NA
1	247937162	247937262	1	247937155	247937155	>s864301	0.225802	1.82387e-16	1	247845366	0.1672	6.69987e-07	rs6690724	rs72772787	7710	0.962	247853076	TRIM58
1	247936959	247937158	1	247937155	247937155	>s864301	0.167563	7.99759e-15	1	247845366	0.1247	2.69728e-06	rs6690724	rs12087575	1632	0.98	247846998	NA
1	247936959	247937158	1	247937155	247937155	>s864301	0.167563	7.99759e-15	1	247845366	0.1247	2.69728e-06	rs6690724	rs72772787	7710	0.962	247853076	TRIM58
11	77808788	77808987	11	77808527	77808838	*	-0.0584793	1.22593e-14	11	77884034	-0.0506	1.88906e-08	rs2051484	rs59986178	235171	0.969	77648864	CLNS1A
11	77808788	77808987	11	77808527	77808838	*	-0.0584793	1.22593e-14	11	77884034	-0.0506	1.88906e-08	rs2051484	rs12418559	169092	0.971	77714943	NR
11	77808788	77808987	11	77808527	77808838	*	-0.0584793	1.22593e-14	11	77884034	-0.0506	1.88906e-08	rs2051484	rs2186564	11814	0.989	77872220	C11orf67
11	77808788	77808987	11	77808527	77808838	*	-0.0584793	1.22593e-14	11	77884034	-0.0506	1.88906e-08	rs2051484	rs2186564	11814	0.989	77872220	NA
11	77808788	77808987	11	77808527	77808838	*	-0.0584793	1.22593e-14	11	77884034	-0.0506	1.88906e-08	rs2051484	rs2051484	0	1	77884034	NA
11	77808788	77808987	11	77808527	77808838	*	-0.0584793	1.22593e-14	11	77884034	-0.0506	1.88906e-08	rs2051484	rs12420528	77785	0.977	77961819	NR
1	247937263	247937462	1	247937155	247937155	>s864301	0.191474	3.66975e-14	1	247845366	0.1485	1.18198e-06	rs6690724	rs12087575	1632	0.98	247846998	NA
1	247937263	247937462	1	247937155	247937155	>s864301	0.191474	3.66975e-14	1	247845366	0.1485	1.18198e-06	rs6690724	rs72772787	7710	0.962	247853076	TRIM58
2	30446665	30446864	2	30447115	30447115	<s725847	0.107242	3.72959e-14	2	30532746	0.1032	6.83219e-11	rs829623	rs829584	78337	0.992	30454409	LCLAT1
2	30446665	30446864	2	30447115	30447115	<s725847	0.107242	3.72959e-14	2	30532746	0.1032	6.83219e-11	rs829623	rs829577	75162	0.992	30457584	LCLAT1
2	30446665	30446864	2	30447115	30447115	<s725847	0.107242	3.72959e-14	2	30532746	0.1032	6.83219e-11	rs829623	rs829562	59856	0.986	30472890	NA
2	30446665	30446864	2	30447115	30447115	<s725847	0.107242	3.72959e-14	2	30532746	0.1032	6.83219e-11	rs829623	rs829636	17811	0.969	30514935	NA
2	30446665	30446864	2	30447115	30447115	<s725847	0.107242	3.72959e-14	2	30532746	0.1032	6.83219e-11	rs829623	rs28538173	22972	0.99	30555718	NA
2	61855256	61855438	2	61855253	61855256	>s56591	0.097187	4.99027e-13	2	61882143	-0.09451	1.40443e-11	rs151311929	rs17014577	37940	0.956	61844203	NA
9	127408233	127408239	9	127409063	127409080	>s1212655	-0.0532842	1.41407e-12	9	127404103	-0.05266	1	rs10819287	rs10819287	0	1	127404103	NR
19	39032842	39033041	19	39031695	39031695	*	0.063145	7.72389e-12	19	39034996	-0.06133	2.50786e-08	rs10416823	rs12971842	16609	0.99	39018387	NR
19	39032842	39033041	19	39031695	39031695	*	0.063145	7.72389e-12	19	39034996	-0.06133	2.50786e-08	rs10416823	rs12985447	16500	0.99	39018496	NR
19	39032842	39033041	19	39031695	39031695	*	0.063145	7.72389e-12	19	39034996	-0.06133	2.50786e-08	rs10416823	rs12972978	7675	0.993	39027321	NR
19	39032842	39033041	19	39031695	39031695	*	0.063145	7.72389e-12	19	39034996	-0.06133	2.50786e-08	rs10416823	rs4280369	591	0.997	39034405	NR
19	39032842	39033041	19	39031695	39031695	*	0.063145	7.72389e-12	19	39034996	-0.06133	2.50786e-08	rs10416823	rs11083499	410	0.997	39034586	NR
19	39032842	39033041	19	39031695	39031695	*	0.063145	7.72389e-12	19	39034996	-0.06133	2.50786e-08	rs10416823	rs10416823	0	1	39034996	NR
19	39032842	39033041	19	39031695	39031695	*	0.063145	7.72389e-12	19	39034996	-0.06133	2.50786e-08	rs10416823	rs1840748	145	0.996	39035141	NR
19	39032842	39033041	19	39031695	39031695	*	0.063145	7.72389e-12	19	39034996	-0.06133	2.50786e-08	rs10416823	rs1840747	165	0.996	39035161	NR
19	39032842	39033041	19	39031695	39031695	*	0.063145	7.72389e-12	19	39034996	-0.06133	2.50786e-08	rs10416823	rs1840746	170	0.996	39035166	NR
19	39032842	39033041	19	39031695	39031695	*	0.063145	7.72389e-12	19	39034996	-0.06133	2.50786e-08	rs10416823	rs1840745	276	0.999	39035272	NR
19	39032842	39033041	19	39031695	39031695	*	0.063145	7.72389e-12	19	39034996	-0.06133	2.50786e-08	rs10416823	rs11083500	425	0.999	39035421	NR
19	39032842	39033041	19	39031695	39031695	*	0.063145	7.72389e-12	19	39034996	-0.06133	2.50786e-08	rs10416823	rs36154890	517	0.999	39035513	NR
19	39032842	39033041	19	39031695	39031695	*	0.063145	7.72389e-12	19	39034996	-0.06133	2.50786e-08	rs10416823	rs4803185	691	0.999	39035687	NR
19	39032842	39033041	19	39031695	39031695	*	0.063145	7.72389e-12	19	39034996	-0.06133	2.50786e-08	rs10416823	rs4803186	762	0.997	39035758	NR
19	39032842	39033041	19	39031695	39031695	*	0.063145	7.72389e-12	19	39034996	-0.06133	2.50786e-08	rs10416823	rs11880441	910	0.997	39035906	NR
19	39032842	39033041	19	39031695	39031695	*	0.063145	7.72389e-12	19	39034996	-0.06133	2.50786e-08	rs10416823	rs4803187	1006	0.997	39036002	NR
19	39032842	39033041	19	39031695	39031695	*	0.063145	7.72389e-12	19	39034996	-0.06133	2.50786e-08	rs10416823	rs11083501	1167	0.997	39036163	NR
19	39032842	39033041	19	39031695	39031695	*	0.063145	7.72389e-12	19	39034996	-0.06133	2.50786e-08	rs10416823	rs11083502	1288	0.997	39036284	NR
19	39032842	39033041	19	39031695	39031695	*	0.063145	7.72389e-12	19	39034996	-0.06133	2.50786e-08	rs10416823	rs12972850	1359	0.997	39036355	NR
19	39032842	39033041	19	39031695	39031695	*	0.063145	7.72389e-12	19	39034996	-0.06133	2.50786e-08	rs10416823	rs10853725	1793	0.997	39036789	NR
19	39032842	39033041	19	39031695	39031695	*	0.063145	7.72389e-12	19	39034996	-0.06133	2.50786e-08	rs10416823	rs7247801	1872	0.995	39036868	NR
19	39032842	39033041	19	39031695	39031695	*	0.063145	7.72389e-12	19	39034996	-0.06133	2.50786e-08	rs10416823	rs6508842	1959	0.996	39036955	NR
19	39032842	39033041	19	39031695	39031695	*	0.063145	7.72389e-12	19	39034996	-0.06133	2.50786e-08	rs10416823	rs6508843	1989	0.996	39036985	NR
19	39032842	39033041	19	39031695	39031695	*	0.063145	7.72389e-12	19	39034996	-0.06133	2.50786e-08	rs10416823	rs8104751	2567	0.996	39037563	NR
19	39032842	39033041	19	39031695	39031695	*	0.063145	7.72389e-12	19	39034996	-0.06133	2.50786e-08	rs10416823	rs8104899	2740	0.995	39037736	NR
19	39032842	39033041	19	39031695	39031695	*	0.063145	7.72389e-12	19	39034996	-0.06133	2.50786e-08	rs10416823	rs8104990	2759	0.994	39037755	NR
19	39032842	39033041	19	39031695	39031695	*	0.063145	7.72389e-12	19	39034996	-0.06133	2.50786e-08	rs10416823	rs8105865	2778	0.995	39037774	NR
19	39032842	39033041	19	39031695	39031695	*	0.063145	7.72389e-12	19	39034996	-0.06133	2.50786e-08	rs10416823	rs10417436	3296	0.994	39038292	NR
19	39032842	39033041	19	39031695	39031695	*	0.063145	7.72389e-12	19	39034996	-0.06133	2.50786e-08	rs10416823	rs7258862	4158	0.996	39039154	NR
19	39032842	39033041	19	39031695	39031695	*	0.063145	7.72389e-12	19	39034996	-0.06133	2.50786e-08	rs10416823	rs10424632	4376	0.994	39039372	NR
19	39032842	39033041	19	39031695	39031695	*	0.063145	7.72389e-12	19	39034996	-0.06133	2.50786e-08	rs10416823	rs10424827	4460	0.995	39039456	NR
19	39032842	39033041	19	39031695	39031695	*	0.063145	7.72389e-12	19	39034996	-0.06133	2.50786e-08	rs10416823	rs4803188	5796	0.995	39040792	NR
17	309681	309880	17	309519	309726	>s493779>s493780>s493781>s493782>s726047<s699018<s699017<s699016<s699015<s699014<s699013<s699012<s699011>s493789	0.0687858	2.69901e-11	17	310732	0.06861	4.24962e-09	rs55842940	rs55842940	0	1	310732	RPH3AL
13	78430539	78430738	13	78424160	78424599	*	0.0374993	6.9161e-11	13	78399088	-0.03382	0.000318033	rs4884091	rs4884091	0	1	78399088	NR
6	133020416	133020615	6	133026753	133026753	>s671974	0.0789339	9.29553e-11	6	133045671	0.07806	1.22322e-08	rs13204469	rs271170	51006	0.956	132994665	LOC285735
22	40537729	40537823	22	40537823	40537911	>s634493>s634494>s634496<s1600033>s634498>s872301>s634500>s634501>s1193277>s634502>s634503>s634504	-0.0278448	1.24302e-10	22	40470759	-0.02666	1.2279e-09	rs5995864	rs2072857	49922	0.964	40420837	NA
22	40537729	40537823	22	40537823	40537911	>s634493>s634494>s634496<s1600033>s634498>s872301>s634500>s634501>s1193277>s634502>s634503>s634504	-0.0278448	1.24302e-10	22	40470759	-0.02666	1.2279e-09	rs5995864	rs17001943	4150	0.97	40466609	MKL1
22	40537729	40537823	22	40537823	40537911	>s634493>s634494>s634496<s1600033>s634498>s872301>s634500>s634501>s1193277>s634502>s634503>s634504	-0.0278448	1.24302e-10	22	40470759	-0.02666	1.2279e-09	rs5995864	rs6001930	9471	0.995	40480230	MKL1
22	40537729	40537823	22	40537823	40537911	>s634493>s634494>s634496<s1600033>s634498>s872301>s634500>s634501>s1193277>s634502>s634503>s634504	-0.0278448	1.24302e-10	22	40470759	-0.02666	1.2279e-09	rs5995864	rs6001930	9471	0.995	40480230	MKL1
22	40537729	40537823	22	40537823	40537911	>s634493>s634494>s634496<s1600033>s634498>s872301>s634500>s634501>s1193277>s634502>s634503>s634504	-0.0278448	1.24302e-10	22	40470759	-0.02666	1.2279e-09	rs5995864	rs6001930	9471	0.995	40480230	NR
22	40537729	40537823	22	40537823	40537911	>s634493>s634494>s634496<s1600033>s634498>s872301>s634500>s634501>s1193277>s634502>s634503>s634504	-0.0278448	1.24302e-10	22	40470759	-0.02666	1.2279e-09	rs5995864	rs6001930	9471	0.995	40480230	NR
22	40537729	40537823	22	40537823	40537911	>s634493>s634494>s634496<s1600033>s634498>s872301>s634500>s634501>s1193277>s634502>s634503>s634504	-0.0278448	1.24302e-10	22	40470759	-0.02666	1.2279e-09	rs5995864	rs6001930	9471	0.995	40480230	NR
22	40537729	40537823	22	40537823	40537911	>s634493>s634494>s634496<s1600033>s634498>s872301>s634500>s634501>s1193277>s634502>s634503>s634504	-0.0278448	1.24302e-10	22	40470759	-0.02666	1.2279e-09	rs5995864	rs6001930	9471	0.995	40480230	NR
22	40537729	40537823	22	40537823	40537911	>s634493>s634494>s634496<s1600033>s634498>s872301>s634500>s634501>s1193277>s634502>s634503>s634504	-0.0278448	1.24302e-10	22	40470759	-0.02666	1.2279e-09	rs5995864	rs6001930	9471	0.995	40480230	MKL1
22	40537729	40537823	22	40537823	40537911	>s634493>s634494>s634496<s1600033>s634498>s872301>s634500>s634501>s1193277>s634502>s634503>s634504	-0.0278448	1.24302e-10	22	40470759	-0.02666	1.2279e-09	rs5995864	rs6001930	9471	0.995	40480230	NA
22	40537729	40537823	22	40537823	40537911	>s634493>s634494>s634496<s1600033>s634498>s872301>s634500>s634501>s1193277>s634502>s634503>s634504	-0.0278448	1.24302e-10	22	40470759	-0.02666	1.2279e-09	rs5995864	rs17001974	10621	1	40481380	MKL1
22	40537729	40537823	22	40537823	40537911	>s634493>s634494>s634496<s1600033>s634498>s872301>s634500>s634501>s1193277>s634502>s634503>s634504	-0.0278448	1.24302e-10	22	40470759	-0.02666	1.2279e-09	rs5995864	rs6001931	10751	1	40481510	NA
22	40537729	40537823	22	40537823	40537911	>s634493>s634494>s634496<s1600033>s634498>s872301>s634500>s634501>s1193277>s634502>s634503>s634504	-0.0278448	1.24302e-10	22	40470759	-0.02666	1.2279e-09	rs5995864	rs6001932	10872	0.998	40481631	NA
22	40537729	40537823	22	40537823	40537911	>s634493>s634494>s634496<s1600033>s634498>s872301>s634500>s634501>s1193277>s634502>s634503>s634504	-0.0278448	1.24302e-10	22	40470759	-0.02666	1.2279e-09	rs5995864	rs17001977	13450	0.97	40484209	MKL1
22	40537729	40537823	22	40537823	40537911	>s634493>s634494>s634496<s1600033>s634498>s872301>s634500>s634501>s1193277>s634502>s634503>s634504	-0.0278448	1.24302e-10	22	40470759	-0.02666	1.2279e-09	rs5995864	rs10483205	16836	0.97	40487595	NR
22	40537729	40537823	22	40537823	40537911	>s634493>s634494>s634496<s1600033>s634498>s872301>s634500>s634501>s1193277>s634502>s634503>s634504	-0.0278448	1.24302e-10	22	40470759	-0.02666	1.2279e-09	rs5995864	rs112880707	17899	0.972	40488658	MKL1
22	40537729	40537823	22	40537823	40537911	>s634493>s634494>s634496<s1600033>s634498>s872301>s634500>s634501>s1193277>s634502>s634503>s634504	-0.0278448	1.24302e-10	22	40470759	-0.02666	1.2279e-09	rs5995864	rs112880707	17899	0.972	40488658	MKL1
22	40537729	40537823	22	40537823	40537911	>s634493>s634494>s634496<s1600033>s634498>s872301>s634500>s634501>s1193277>s634502>s634503>s634504	-0.0278448	1.24302e-10	22	40470759	-0.02666	1.2279e-09	rs5995864	rs112880707	17899	0.972	40488658	MKL1
7	157926018	157926217	7	157927306	157927369	>s221364	0.0512618	3.9207e-10	7	157930344	-0.0438	1.17297e-05	rs892730	rs6459818	8788	0.995	157921556	Intergenic
8	23888401	23888443	8	23888972	23889000	>s1430718	-0.105039	5.7335e-10	8	23877217	-0.09635	4.0983e-08	rs73555348	rs17785813	464	0.995	23876753	NR
3	177201283	177201482	3	177195443	177195459	>s109075	0.0633335	1.02779e-09	3	177157184	-0.05756	4.33261e-05	rs6774221	rs7617950	592	0.963	177156592	NA
3	177201283	177201482	3	177195443	177195459	>s109075	0.0633335	1.02779e-09	3	177157184	-0.05756	4.33261e-05	rs6774221	rs1920130	12796	0.998	177169980	NR
3	177201283	177201482	3	177195443	177195459	>s109075	0.0633335	1.02779e-09	3	177157184	-0.05756	4.33261e-05	rs6774221	rs6804442	34689	0.99	177191873	NA
3	177201283	177201482	3	177195443	177195459	>s109075	0.0633335	1.02779e-09	3	177157184	-0.05756	4.33261e-05	rs6774221	rs12490455	35605	0.973	177192789	NA
3	177201283	177201482	3	177195443	177195459	>s109075	0.0633335	1.02779e-09	3	177157184	-0.05756	4.33261e-05	rs6774221	rs12493005	37927	0.973	177195111	NR
3	177201283	177201482	3	177195443	177195459	>s109075	0.0633335	1.02779e-09	3	177157184	-0.05756	4.33261e-05	rs6774221	rs12493005	37927	0.973	177195111	NR
12	56794716	56794915	12	56789368	56789395	>s380793<s1638880>s380795>s380799>s380800	-0.0628777	1.70292e-09	12	56813646	0.06106	2.14761e-05	rs10876928	rs12367822	3270	0.999	56810376	HSD17B6
16	55762535	55762721	16	55762904	55762940	>s486931	0.132353	1.84103e-09	16	55813139	0.1275	2.25443e-06	rs3859093	rs2244613	2442	0.98	55810697	CES1
2	1797988	1798187	2	1797897	1798220	>s49329>s49330>s49331<s810481>s49332	0.19043	4.08799e-09	2	1851795	0.1576	0.00056593	rs4553849	rs4553849	0	1	1851795	MYT1L
1	198846184	198846363	1	198846184	198846193	>s40265	0.0738511	4.12396e-09	1	198842243	-0.07235	1.6624e-07	rs10919593	rs10919593	0	1	198842243	NA
17	31771574	31771773	17	31771729	31771833	>s725423	0.058611	5.10301e-09	17	31756308	0.05577	8.07789e-06	rs2343844	rs4795646	9571	0.996	31765879	NR
2	128471142	128471171	2	128471465	128471677	>s72465>s72466>s72467>s72468>s72469>s72470	0.0236428	8.68196e-09	2	128472436	-0.02195	4.78696e-06	rs4662609	rs13394036	5135	0.974	128477571	UGCGL1
4	156150147	156150252	4	156152015	156152015	>s819881>s819882>s819883>s819884>s819885>s819886>s819887	-0.032562	1.25802e-08	4	156195774	-0.02525	0.000658924	rs9307941	rs9307941	0	1	156195774	NA
2	128471400	128471405	2	128471465	128471677	>s72465>s72466>s72467>s72468>s72469>s72470	0.0405059	1.38485e-08	2	128472436	-0.03977	1.77872e-08	rs4662609	rs13394036	5135	0.974	128477571	UGCGL1
4	135418586	135418785	4	135417093	135417136	>s133713>s133714	0.0678912	2.3087e-08	4	135442769	-0.06574	0.000743209	rs62323004	rs71602617	42231	0.994	135485000	NR
4	135418586	135418785	4	135417093	135417136	>s133713>s133714	0.0678912	2.3087e-08	4	135442769	-0.06574	0.000743209	rs62323004	rs71602617	42231	0.994	135485000	NR
6	149984859	149985058	6	149981527	149981673	*	-0.0881913	2.63158e-08	6	149981212	-0.08225	1.98235e-05	rs4869780	rs1853665	3506	0.964	149977706	ULBP1
6	149984859	149985058	6	149981527	149981673	*	-0.0881913	2.63158e-08	6	149981212	-0.08225	1.98235e-05	rs4869780	rs1853665	3506	0.964	149977706	ULBP2
6	149984859	149985058	6	149981527	149981673	*	-0.0881913	2.63158e-08	6	149981212	-0.08225	1.98235e-05	rs4869780	rs4869780	0	1	149981212	NA
6	149984859	149985058	6	149981527	149981673	*	-0.0881913	2.63158e-08	6	149981212	-0.08225	1.98235e-05	rs4869780	rs4869780	0	1	149981212	NA
6	149984859	149985058	6	149981527	149981673	*	-0.0881913	2.63158e-08	6	149981212	-0.08225	1.98235e-05	rs4869780	rs4869780	0	1	149981212	NA
13	55367333	55367453	13	55367337	55367337	>s677616	0.0417362	5.87397e-08	13	55460120	0.04029	1	rs11148342	rs12866091	347192	0.961	55112928	NR
13	55367333	55367453	13	55367337	55367337	>s677616	0.0417362	5.87397e-08	13	55460120	0.04029	1	rs11148342	rs7325545	181736	0.98	55278384	NR
13	55367333	55367453	13	55367337	55367337	>s677616	0.0417362	5.87397e-08	13	55460120	0.04029	1	rs11148342	rs9597183	12280	0.991	55447840	NR
10	738220	738419	10	737118	737147	>s320815>s320816>s320817>s320818>s993903>s993904>s993905>s320820>s715896>s715897	0.0370129	8.35109e-08	10	745770	0.03647	1.01847e-07	rs35009463	rs1750785	15560	0.972	730210	NA
16	30124025	30124224	16	30124000	30124005	*	-0.0738556	8.81821e-08	16	30100583	-0.06371	0.00589264	rs6565174	rs6565174	0	1	30100583	RP11-455F5.3
16	30124025	30124224	16	30124000	30124005	*	-0.0738556	8.81821e-08	16	30100583	-0.06371	0.00589264	rs6565174	rs6565174	0	1	30100583	NA
6	151512817	151513016	6	151512775	151512781	>s187321	0.104925	9.07482e-08	6	151517110	-0.1024	6.65514e-07	rs7759516	rs7759516	0	1	151517110	NR
6	151512817	151513016	6	151512775	151512781	>s187321	0.104925	9.07482e-08	6	151517110	-0.1024	6.65514e-07	rs7759516	rs954238	6198	0.997	151523308	NA
11	95442816	95443015	11	95442259	95442268	*	-0.0733909	9.20356e-08	11	95443374	-0.06578	6.85692e-05	rs12575842	rs17625540	7817	0.978	95451191	NA
11	95445016	95445215	11	95442259	95442268	*	0.0647833	1.10234e-07	11	95444797	0.06335	7.22765e-06	rs4121861	rs17625540	6394	0.978	95451191	NA
2	187557271	187557470	2	187556871	187557390	*	-0.0248904	1.8648e-07	2	187531609	-0.02375	1.20351e-05	rs35935664	rs7573488	1744	0.991	187533353	AC007319.1,TFPI
12	98490535	98490734	12	98490797	98490797	>s792152	0.0452097	2.10674e-07	12	98474278	0.04356	7.50206e-05	rs112195405	rs73136449	3995	0.999	98470283	NA
3	49398871	49399049	3	49399054	49399087	>s90708	-0.0359336	4.05718e-07	3	49420833	0.03343	4.6221e-06	rs1464568	rs17650792	68016	0.999	49352817	NR
3	49398871	49399049	3	49399054	49399087	>s90708	-0.0359336	4.05718e-07	3	49420833	0.03343	4.6221e-06	rs1464568	rs6784820	7402	0.998	49413431	TCTA
3	49398871	49399049	3	49399054	49399087	>s90708	-0.0359336	4.05718e-07	3	49420833	0.03343	4.6221e-06	rs1464568	rs11130194	17423	0.999	49438256	NICN1
3	49398871	49399049	3	49399054	49399087	>s90708	-0.0359336	4.05718e-07	3	49420833	0.03343	4.6221e-06	rs1464568	rs13096760	18540	0.992	49439373	NICN1
3	49398871	49399049	3	49399054	49399087	>s90708	-0.0359336	4.05718e-07	3	49420833	0.03343	4.6221e-06	rs1464568	rs11130206	138327	0.974	49559160	BSN
9	95498160	95498359	9	95504023	95504062	*	0.0310791	5.6907e-07	9	95507886	0.03068	4.61118e-05	rs1355620	rs4448343	3798	0.985	95504088	PTCH1
9	95498160	95498359	9	95504023	95504062	*	0.0310791	5.6907e-07	9	95507886	0.03068	4.61118e-05	rs1355620	rs1355620	0	1	95507886	Intergenic
9	95498160	95498359	9	95504023	95504062	*	0.0310791	5.6907e-07	9	95507886	0.03068	4.61118e-05	rs1355620	rs1355620	0	1	95507886	Intergenic
9	95498160	95498359	9	95504023	95504062	*	0.0310791	5.6907e-07	9	95507886	0.03068	4.61118e-05	rs1355620	rs1355620	0	1	95507886	NR
9	95498160	95498359	9	95504023	95504062	*	0.0310791	5.6907e-07	9	95507886	0.03068	4.61118e-05	rs1355620	rs1355620	0	1	95507886	NA
9	95498160	95498359	9	95504023	95504062	*	0.0310791	5.6907e-07	9	95507886	0.03068	4.61118e-05	rs1355620	rs1355619	3	1	95507889	Intergenic
9	95498160	95498359	9	95504023	95504062	*	0.0310791	5.6907e-07	9	95507886	0.03068	4.61118e-05	rs1355620	rs1355619	3	1	95507889	NA
9	95498160	95498359	9	95504023	95504062	*	0.0310791	5.6907e-07	9	95507886	0.03068	4.61118e-05	rs1355620	rs28496034	8164	0.994	95516050	NR
2	145376710	145376909	2	145383218	145383218	*	0.0182241	8.93853e-07	2	145386062	-0.01816	0.000102231	rs13393501	rs34338764	2822	1	145388884	NR
2	145376710	145376909	2	145383218	145383218	*	0.0182241	8.93853e-07	2	145386062	-0.01816	0.000102231	rs13393501	rs6745444	11741	1	145397803	DKFZp686O1327
2	145376710	145376909	2	145383218	145383218	*	0.0182241	8.93853e-07	2	145386062	-0.01816	0.000102231	rs13393501	rs12617922	13049	0.999	145399111	TEX41,ACVR2A
2	6418025	6418224	2	6419899	6420209	*	0.0703461	1.00585e-06	2	6419487	0.06669	0.000187635	rs76361120	rs75987043	5710	0.993	6413777	NA
11	34405568	34405653	11	34405533	34405541	>s355030>s869561>s869562	0.108699	2.55351e-06	11	34377455	0.1051	0.00227712	rs117281678	rs11032641	4493	1	34381948	NA
7	76947288	76947487	7	76937902	76937902	*	0.042219	2.7538e-06	7	76980982	0.0381	0.00334104	rs62473743	rs6954694	21799	0.97	77002781	NA
7	76947288	76947487	7	76937902	76937902	*	0.042219	2.7538e-06	7	76980982	0.0381	0.00334104	rs62473743	rs6954694	21799	0.97	77002781	NA
7	76947288	76947487	7	76937902	76937902	*	0.042219	2.7538e-06	7	76980982	0.0381	0.00334104	rs62473743	rs6955651	29572	0.962	77010554	KIAA1505
4	155537270	155537469	4	155538923	155538923	*	0.0757166	3.79961e-06	4	155618487	0.0347	1	rs7679296	rs12650590	382	0.969	155618869	GUCY1A3
5	178921330	178921529	5	178925163	178926196	<s816137	-0.0611046	4.81677e-06	5	178939109	-0.05697	0.00056564	rs111403521	rs12186577	6121	0.996	178932988	ZNF354B,ZFP2,ZNF454,GRM6
5	178921330	178921529	5	178925163	178926196	<s816137	-0.0611046	4.81677e-06	5	178939109	-0.05697	0.00056564	rs111403521	rs12186577	6121	0.996	178932988	NR
2	43508024	43508223	2	43515269	43515397	>s54876<s806102>s54881>s54882	0.0592879	5.51507e-06	2	43526774	0.05868	4.53431e-05	rs6726917	rs75126888	89906	0.981	43436868	NR
2	43508024	43508223	2	43515269	43515397	>s54876<s806102>s54881>s54882	0.0592879	5.51507e-06	2	43526774	0.05868	4.53431e-05	rs6726917	rs7609283	88735	0.979	43438039	NA
2	43508024	43508223	2	43515269	43515397	>s54876<s806102>s54881>s54882	0.0592879	5.51507e-06	2	43526774	0.05868	4.53431e-05	rs6726917	rs17030818	73595	0.976	43453179	THADA
2	43508024	43508223	2	43515269	43515397	>s54876<s806102>s54881>s54882	0.0592879	5.51507e-06	2	43526774	0.05868	4.53431e-05	rs6726917	rs17030845	66034	0.974	43460740	THADA
2	43508024	43508223	2	43515269	43515397	>s54876<s806102>s54881>s54882	0.0592879	5.51507e-06	2	43526774	0.05868	4.53431e-05	rs6726917	rs6752964	742	0.997	43527516	NR
2	43508024	43508223	2	43515269	43515397	>s54876<s806102>s54881>s54882	0.0592879	5.51507e-06	2	43526774	0.05868	4.53431e-05	rs6726917	rs6752964	742	0.997	43527516	NR
2	43508024	43508223	2	43515269	43515397	>s54876<s806102>s54881>s54882	0.0592879	5.51507e-06	2	43526774	0.05868	4.53431e-05	rs6726917	rs7591387	2119	0.999	43528893	NA
2	43508024	43508223	2	43515269	43515397	>s54876<s806102>s54881>s54882	0.0592879	5.51507e-06	2	43526774	0.05868	4.53431e-05	rs6726917	rs77881454	3380	0.991	43530154	NA
2	43508024	43508223	2	43515269	43515397	>s54876<s806102>s54881>s54882	0.0592879	5.51507e-06	2	43526774	0.05868	4.53431e-05	rs6726917	rs77881454	3380	0.991	43530154	NR
2	43508024	43508223	2	43515269	43515397	>s54876<s806102>s54881>s54882	0.0592879	5.51507e-06	2	43526774	0.05868	4.53431e-05	rs6726917	rs77881454	3380	0.991	43530154	THADA
2	43508024	43508223	2	43515269	43515397	>s54876<s806102>s54881>s54882	0.0592879	5.51507e-06	2	43526774	0.05868	4.53431e-05	rs6726917	rs77881454	3380	0.991	43530154	THADA
2	235770357	235770556	2	235764824	235764825	>s1436254	0.0210971	5.58003e-06	2	235722365	0.02093	0.00632099	rs2675123	rs2696418	5978	0.995	235728343	NR
17	82852619	82852818	17	82846264	82846312	>s513152>s513153>s513154>s513155>s513156>s513157	0.0247557	6.40827e-06	17	82822154	-0.02141	1	rs62073990	rs62073990	0	1	82822154	NR
8	109065066	109065265	8	109065244	109065244	*	0.0452362	7.23795e-06	8	109067491	-0.04486	0.00282681	rs7819184	rs34080186	9234	0.999	109058257	RP11-1084E5.1,TRHR,NUDCD1
10	745482	745681	10	737118	737147	>s320815<s776090>s320816>s320817>s1000303>s993905>s320820>s320821>s675801>s1043417>s675802>s320823>s320824>s320825>s320826>s320827>s320828>s320829>s320830>s320831>s320832>s675805>s320834	-0.0268061	1.04211e-05	10	754599	-0.02677	4.84333e-05	rs11595385	rs877282	29007	0.953	725592	DIP2C
13	41428260	41428459	13	41427977	41428059	>s408717	-0.0334721	1.04625e-05	13	41393893	0.03077	1	rs9566761	rs9566740	102704	0.964	41291189	NA
7	135101955	135102154	7	135096603	135096605	*	0.019923	1.0529e-05	7	135172272	0.01881	0.00259944	rs62481877	rs76510925	1299	0.981	135170973	NA
8	127308186	127308385	8	127317149	127317161	>s239942>s239943>s1040602>s239960>s239961>s239962>s239963<s747067>s239964	-0.0520107	1.77015e-05	8	127310912	-0.047	0.00231373	rs60163266	rs16902104	17751	0.976	127328663	NR
8	127308186	127308385	8	127317149	127317161	>s239942>s239943>s1040602>s239960>s239961>s239962>s239963<s747067>s239964	-0.0520107	1.77015e-05	8	127310912	-0.047	0.00231373	rs60163266	rs16902104	17751	0.976	127328663	NR
11	95443616	95443815	11	95442259	95442268	>s365343	0.0463107	2.51582e-05	11	95443374	-0.03871	0.0784031	rs12575842	rs17625540	7817	0.978	95451191	NA
10	105308109	105308308	10	105300979	105302599	<s849091	-0.0282621	2.67302e-05	10	105303957	-0.02826	0.000547298	rs4451638	rs11192399	20599	0.966	105324556	NR
10	105308109	105308308	10	105300979	105302599	<s849091	-0.0282621	2.67302e-05	10	105303957	-0.02826	0.000547298	rs4451638	rs12359689	31655	0.965	105335612	SORCS3
8	120340310	120340509	8	120348270	120348270	>s1413251	0.0339116	5.03221e-05	8	120357192	-0.03219	0.000152505	rs11782639	rs6987036	27614	0.977	120329578	NR
2	1735863	1736062	2	1738161	1738167	>s49275	0.059168	5.0864e-05	2	1643932	-0.04874	1	rs111531455	rs73178769	2068	0.962	1641864	NA
18	79767687	79767886	18	79764511	79764902	>s530047>s530048>s530049>s530050>s680426>s530051>s530052>s530053<s796122>s530055>s530056	-0.0554307	5.72973e-05	18	79767195	-0.04697	0.000123171	rs523386	rs142014757	15927	0.99	79751268	NA
1	195073162	195073361	1	195074414	195074414	*	0.0252563	5.98698e-05	1	195081460	-0.02328	0.0522542	rs1490383	rs10921744	31754	0.95	195049706	NR
19	58600655	58600854	19	58605628	58605629	<s700996	-0.0662349	6.16136e-05	19	58567729	-0.06509	0.000480988	rs73068325	rs11669345	16837	0.991	58550892	UBE2M,CHMP2A,TRIM28
19	58600655	58600854	19	58605628	58605629	<s700996	-0.0662349	6.16136e-05	19	58567729	-0.06509	0.000480988	rs73068325	rs73068325	0	1	58567729	NR
1	165891470	165891669	1	165892147	165892147	<s683864<s683863	-0.0220885	6.52846e-05	1	165900130	-0.01994	0.011325	rs4656466	rs3790672	4025	0.95	165904155	UCK2
1	165891470	165891669	1	165892147	165892147	<s683864<s683863	-0.0220885	6.52846e-05	1	165900130	-0.01994	0.011325	rs4656466	rs3790672	4025	0.95	165904155	UCK2
1	165891470	165891669	1	165892147	165892147	<s683864<s683863	-0.0220885	6.52846e-05	1	165900130	-0.01994	0.011325	rs4656466	rs3790672	4025	0.95	165904155	UCK2
1	165891470	165891669	1	165892147	165892147	<s683864<s683863	-0.0220885	6.52846e-05	1	165900130	-0.01994	0.011325	rs4656466	rs3790672	4025	0.95	165904155	UCK2
3	40471311	40471510	3	40475235	40475235	*	0.020696	6.63124e-05	3	40393905	-0.01983	0.0214481	rs12490275	rs9822909	21688	0.99	40415593	NR
6	29722086	29722285	6	29720319	29720319	>s672513	-0.046225	7.38085e-05	6	29666235	-0.042	0.0504022	rs3130253	rs3130253	0	1	29666235	MOG
16	84515484	84515683	16	84517674	84518507	>s490198	0.0540668	7.74659e-05	16	84538890	0.04276	1	rs57832043	rs57832043	0	1	84538890	NR
8	75101399	75101484	8	75101940	75101940	*	0.0523603	8.29439e-05	8	75175759	-0.02043	1	rs72656152	rs72656192	60024	0.997	75235783	NA
19	46832961	46833160	19	46833484	46833484	*	0.016003	8.29577e-05	19	46911729	0.01404	1	rs311372	rs311372	0	1	46911729	intergenic
2	123318484	123318683	2	123321083	123321177	>s71844	0.0420671	0.000119283	2	123373582	0.02289	1	rs72843566	rs3923097	110368	0.985	123263214	TSN,CNTNAP5
2	123318484	123318683	2	123321083	123321177	>s71844	0.0420671	0.000119283	2	123373582	0.02289	1	rs72843566	rs3923097	110368	0.985	123263214	TSN,CNTNAP5
11	128824518	128824717	11	128824604	128824656	*	0.069438	0.000120441	11	128822025	0.04288	0.0272629	rs654169	rs654169	0	1	128822025	NR
17	41777065	41777264	17	41771538	41771538	*	0.0743403	0.000127392	17	41789010	-0.03932	1	rs28590627	rs78139258	11760	0.988	41800770	LEPREL4
10	746082	746281	10	737118	737147	>s320815<s776090>s320816>s320817>s1000303>s993905>s320820>s320821>s675801>s1043417>s675802>s320823>s320824>s320825>s320826>s320827>s320828>s320829>s320830>s320831>s320832>s675805>s320834	-0.0196958	0.000131024	10	754599	-0.01881	0.00185186	rs11595385	rs877282	29007	0.953	725592	DIP2C
15	47215692	47215891	15	47215136	47215136	*	0.0297773	0.00014068	15	47221056	-0.02955	0.0625328	rs6493265	rs12914084	10902	0.997	47210154	NR
15	47215692	47215891	15	47215136	47215136	*	0.0297773	0.00014068	15	47221056	-0.02955	0.0625328	rs6493265	rs6493265	0	1	47221056	NA
15	47215692	47215891	15	47215136	47215136	*	0.0297773	0.00014068	15	47221056	-0.02955	0.0625328	rs6493265	rs2860049	2142	0.993	47223198	Intergenic
15	47215692	47215891	15	47215136	47215136	*	0.0297773	0.00014068	15	47221056	-0.02955	0.0625328	rs6493265	rs2860049	2142	0.993	47223198	NA
15	47215692	47215891	15	47215136	47215136	*	0.0297773	0.00014068	15	47221056	-0.02955	0.0625328	rs6493265	rs11853760	5119	0.992	47226175	NA
19	30526648	30526847	19	30522261	30522284	>s545592>s809175	-0.0269798	0.000172688	19	30528900	-0.02615	0.0267625	rs11084554	rs12459057	23282	0.964	30505618	NR
1	26818445	26818644	1	26818217	26818316	>s8308	0.0159492	0.00017962	1	26888588	-0.01081	1	rs34460334	rs35738294	194946	0.965	26693642	NA
1	26818445	26818644	1	26818217	26818316	>s8308	0.0159492	0.00017962	1	26888588	-0.01081	1	rs34460334	rs4579782	188092	0.966	26700496	ARID1A
1	26818445	26818644	1	26818217	26818316	>s8308	0.0159492	0.00017962	1	26888588	-0.01081	1	rs34460334	rs112535818	92927	0.98	26795661	PIGV
1	26818445	26818644	1	26818217	26818316	>s8308	0.0159492	0.00017962	1	26888588	-0.01081	1	rs34460334	rs112535818	92927	0.98	26795661	NR
1	26818445	26818644	1	26818217	26818316	>s8308	0.0159492	0.00017962	1	26888588	-0.01081	1	rs34460334	rs35538083	80658	0.981	26807930	PIGV
1	26818445	26818644	1	26818217	26818316	>s8308	0.0159492	0.00017962	1	26888588	-0.01081	1	rs34460334	rs12748152	76686	0.98	26811902	PIGV,NR0B2
1	26818445	26818644	1	26818217	26818316	>s8308	0.0159492	0.00017962	1	26888588	-0.01081	1	rs34460334	rs12748152	76686	0.98	26811902	PIGV,NR0B2
1	26818445	26818644	1	26818217	26818316	>s8308	0.0159492	0.00017962	1	26888588	-0.01081	1	rs34460334	rs12748152	76686	0.98	26811902	PIGV,NR0B2
1	26818445	26818644	1	26818217	26818316	>s8308	0.0159492	0.00017962	1	26888588	-0.01081	1	rs34460334	rs12748152	76686	0.98	26811902	PIGV,NROB2
1	26818445	26818644	1	26818217	26818316	>s8308	0.0159492	0.00017962	1	26888588	-0.01081	1	rs34460334	rs12748152	76686	0.98	26811902	PIGV
1	26818445	26818644	1	26818217	26818316	>s8308	0.0159492	0.00017962	1	26888588	-0.01081	1	rs34460334	rs12748152	76686	0.98	26811902	PIGV,NROB2
1	26818445	26818644	1	26818217	26818316	>s8308	0.0159492	0.00017962	1	26888588	-0.01081	1	rs34460334	rs12748152	76686	0.98	26811902	PIGV,NROB2
1	26818445	26818644	1	26818217	26818316	>s8308	0.0159492	0.00017962	1	26888588	-0.01081	1	rs34460334	rs12748152	76686	0.98	26811902	PIGV,NROB2
1	26818445	26818644	1	26818217	26818316	>s8308	0.0159492	0.00017962	1	26888588	-0.01081	1	rs34460334	rs12748152	76686	0.98	26811902	NR
1	26818445	26818644	1	26818217	26818316	>s8308	0.0159492	0.00017962	1	26888588	-0.01081	1	rs34460334	rs12748152	76686	0.98	26811902	NR
1	26818445	26818644	1	26818217	26818316	>s8308	0.0159492	0.00017962	1	26888588	-0.01081	1	rs34460334	rs12748152	76686	0.98	26811902	NR
1	26818445	26818644	1	26818217	26818316	>s8308	0.0159492	0.00017962	1	26888588	-0.01081	1	rs34460334	rs12748152	76686	0.98	26811902	NR
1	26818445	26818644	1	26818217	26818316	>s8308	0.0159492	0.00017962	1	26888588	-0.01081	1	rs34460334	rs12748152	76686	0.98	26811902	NA
1	26818445	26818644	1	26818217	26818316	>s8308	0.0159492	0.00017962	1	26888588	-0.01081	1	rs34460334	rs12748152	76686	0.98	26811902	NA
1	26818445	26818644	1	26818217	26818316	>s8308	0.0159492	0.00017962	1	26888588	-0.01081	1	rs34460334	rs12748152	76686	0.98	26811902	NA
1	26818445	26818644	1	26818217	26818316	>s8308	0.0159492	0.00017962	1	26888588	-0.01081	1	rs34460334	rs41307935	34012	0.989	26854576	ZDHHC18
1	26818445	26818644	1	26818217	26818316	>s8308	0.0159492	0.00017962	1	26888588	-0.01081	1	rs34460334	rs145685168	57521	0.963	26946109	NR
1	26818445	26818644	1	26818217	26818316	>s8308	0.0159492	0.00017962	1	26888588	-0.01081	1	rs34460334	rs145685168	57521	0.963	26946109	NR
1	26818445	26818644	1	26818217	26818316	>s8308	0.0159492	0.00017962	1	26888588	-0.01081	1	rs34460334	rs145685168	57521	0.963	26946109	NR
1	26818445	26818644	1	26818217	26818316	>s8308	0.0159492	0.00017962	1	26888588	-0.01081	1	rs34460334	rs145685168	57521	0.963	26946109	NR
1	26818445	26818644	1	26818217	26818316	>s8308	0.0159492	0.00017962	1	26888588	-0.01081	1	rs34460334	rs145685168	57521	0.963	26946109	NR
1	26818445	26818644	1	26818217	26818316	>s8308	0.0159492	0.00017962	1	26888588	-0.01081	1	rs34460334	rs145685168	57521	0.963	26946109	NR
1	26818445	26818644	1	26818217	26818316	>s8308	0.0159492	0.00017962	1	26888588	-0.01081	1	rs34460334	rs145685168	57521	0.963	26946109	NR
1	26818445	26818644	1	26818217	26818316	>s8308	0.0159492	0.00017962	1	26888588	-0.01081	1	rs34460334	rs145685168	57521	0.963	26946109	NR
1	26818445	26818644	1	26818217	26818316	>s8308	0.0159492	0.00017962	1	26888588	-0.01081	1	rs34460334	rs145685168	57521	0.963	26946109	NR
1	26818445	26818644	1	26818217	26818316	>s8308	0.0159492	0.00017962	1	26888588	-0.01081	1	rs34460334	rs145685168	57521	0.963	26946109	NR
1	26818445	26818644	1	26818217	26818316	>s8308	0.0159492	0.00017962	1	26888588	-0.01081	1	rs34460334	rs145685168	57521	0.963	26946109	NR
1	26818445	26818644	1	26818217	26818316	>s8308	0.0159492	0.00017962	1	26888588	-0.01081	1	rs34460334	rs145685168	57521	0.963	26946109	NR
1	26818445	26818644	1	26818217	26818316	>s8308	0.0159492	0.00017962	1	26888588	-0.01081	1	rs34460334	rs17360994	63494	0.977	26952082	KDF1
1	26818445	26818644	1	26818217	26818316	>s8308	0.0159492	0.00017962	1	26888588	-0.01081	1	rs34460334	rs12742376	70116	0.979	26958704	C1orf172
1	26818445	26818644	1	26818217	26818316	>s8308	0.0159492	0.00017962	1	26888588	-0.01081	1	rs34460334	rs6656815	77383	0.975	26965971	NA
1	24197111	24197310	1	24196801	24197184	>s737856	0.0972223	0.000184687	1	24185565	0.08948	0.0566187	rs4489498	rs4649201	2620	0.973	24182945	NR
1	24197111	24197310	1	24196801	24197184	>s737856	0.0972223	0.000184687	1	24185565	0.08948	0.0566187	rs4489498	rs78312791	1558	0.991	24187123	NR
13	110475323	110475522	13	110474761	110474761	<s697443	0.0187713	0.00019475	13	110393398	0.01531	1	rs78368565	rs78368565	0	1	110393398	COL4A2
12	110101225	110101424	12	110093138	110093166	>s385566	-0.0405563	0.000212562	12	110094607	0.0321	0.0094826	rs11065009	rs12427218	5410	0.996	110089197	NA
12	123724732	123724931	12	123728907	123728983	>s387450	0.0270472	0.000221668	12	123721886	-0.02603	0.0482525	rs10160937	rs7398606	8461	0.995	123730347	NR
19	2330527	2330726	19	2333007	2333128	>s532342<s876680<s876679>s532343	0.0497934	0.000227159	19	2346380	0.04625	0.0903697	rs75504785	rs77855457	8533	0.999	2354913	Intergenic
7	2174799	2174998	7	2169758	2169928	>s195898	-0.0228878	0.000236258	7	2202227	-0.02164	0.0164268	rs749991	rs34782622	46730	0.957	2155497	Intergenic
20	23975895	23975912	20	23984988	23985095	>s556096	0.0413021	0.000248303	20	23889110	-0.03387	1	rs78187307	rs78187307	0	1	23889110	NR
15	83903057	83903256	15	83903920	83903937	>s470444>s470445>s470446>s470447	0.0289509	0.000299713	15	83897792	0.02683	0.685424	rs11259927	rs906425	22278	0.998	83920070	ADAMTSL3
15	83903057	83903256	15	83903920	83903937	>s470444>s470445>s470446>s470447	0.0289509	0.000299713	15	83897792	0.02683	0.685424	rs11259927	rs10520572	25131	0.991	83922923	ADAMTSL3
20	38307641	38307840	20	38313724	38313805	*	-0.126058	0.000301379	20	38313235	-0.1222	0.0100968	rs142680289	rs75444346	2058	0.974	38315293	NA
15	78983539	78983738	15	78993288	78993520	>s469896	0.0677885	0.000327848	15	78953824	0.03689	1	rs62013235	rs62013235	0	1	78953824	NA
2	143245207	143245406	2	143253217	143253217	>s795395	0.0853214	0.00034058	2	143253681	0.08145	0.0830258	rs7576338	rs35713119	62895	0.977	143190786	NA
2	143245207	143245406	2	143253217	143253217	>s795395	0.0853214	0.00034058	2	143253681	0.08145	0.0830258	rs7576338	rs62171698	52154	0.978	143201527	NA
2	143245207	143245406	2	143253217	143253217	>s795395	0.0853214	0.00034058	2	143253681	0.08145	0.0830258	rs7576338	rs62171698	52154	0.978	143201527	NR
2	143245207	143245406	2	143253217	143253217	>s795395	0.0853214	0.00034058	2	143253681	0.08145	0.0830258	rs7576338	rs62171698	52154	0.978	143201527	ARHGAP15
2	143245207	143245406	2	143253217	143253217	>s795395	0.0853214	0.00034058	2	143253681	0.08145	0.0830258	rs7576338	rs6710871	50657	0.981	143203024	NR
2	143245207	143245406	2	143253217	143253217	>s795395	0.0853214	0.00034058	2	143253681	0.08145	0.0830258	rs7576338	rs6710871	50657	0.981	143203024	NA
2	143245207	143245406	2	143253217	143253217	>s795395	0.0853214	0.00034058	2	143253681	0.08145	0.0830258	rs7576338	rs1376749	43858	0.981	143209823	NA
11	101387504	101387703	11	101386088	101386110	>s676215	0.053505	0.000348344	11	101363528	0.05323	0.00487015	rs7122352	rs2508362	26539	0.99	101390067	PGR,TRPC6
2	187278776	187278975	2	187287328	187287661	>s77642>s77643>s77644>s77645>s77646>s77647>s77648>s77649>s77651	-0.0271144	0.000365102	2	187250671	-0.02584	0.045034	rs1569135	rs13424740	32275	0.996	187218396	CALCRL
2	187278776	187278975	2	187287328	187287661	>s77642>s77643>s77644>s77645>s77646>s77647>s77648>s77649>s77651	-0.0271144	0.000365102	2	187250671	-0.02584	0.045034	rs1569135	rs13424740	32275	0.996	187218396	NR
2	187278776	187278975	2	187287328	187287661	>s77642>s77643>s77644>s77645>s77646>s77647>s77648>s77649>s77651	-0.0271144	0.000365102	2	187250671	-0.02584	0.045034	rs1569135	rs13424740	32275	0.996	187218396	NR
2	187278776	187278975	2	187287328	187287661	>s77642>s77643>s77644>s77645>s77646>s77647>s77648>s77649>s77651	-0.0271144	0.000365102	2	187250671	-0.02584	0.045034	rs1569135	rs13424740	32275	0.996	187218396	CALCRL
2	187278776	187278975	2	187287328	187287661	>s77642>s77643>s77644>s77645>s77646>s77647>s77648>s77649>s77651	-0.0271144	0.000365102	2	187250671	-0.02584	0.045034	rs1569135	rs13424740	32275	0.996	187218396	CALCRL
2	187278776	187278975	2	187287328	187287661	>s77642>s77643>s77644>s77645>s77646>s77647>s77648>s77649>s77651	-0.0271144	0.000365102	2	187250671	-0.02584	0.045034	rs1569135	rs13424740	32275	0.996	187218396	CALCRL
2	187278776	187278975	2	187287328	187287661	>s77642>s77643>s77644>s77645>s77646>s77647>s77648>s77649>s77651	-0.0271144	0.000365102	2	187250671	-0.02584	0.045034	rs1569135	rs13424740	32275	0.996	187218396	CALCRL
2	187278776	187278975	2	187287328	187287661	>s77642>s77643>s77644>s77645>s77646>s77647>s77648>s77649>s77651	-0.0271144	0.000365102	2	187250671	-0.02584	0.045034	rs1569135	rs13424740	32275	0.996	187218396	CALCRL
2	187278776	187278975	2	187287328	187287661	>s77642>s77643>s77644>s77645>s77646>s77647>s77648>s77649>s77651	-0.0271144	0.000365102	2	187250671	-0.02584	0.045034	rs1569135	rs13424740	32275	0.996	187218396	CALCRL
2	187278776	187278975	2	187287328	187287661	>s77642>s77643>s77644>s77645>s77646>s77647>s77648>s77649>s77651	-0.0271144	0.000365102	2	187250671	-0.02584	0.045034	rs1569135	rs13424740	32275	0.996	187218396	CALCRL
2	187278776	187278975	2	187287328	187287661	>s77642>s77643>s77644>s77645>s77646>s77647>s77648>s77649>s77651	-0.0271144	0.000365102	2	187250671	-0.02584	0.045034	rs1569135	rs13424740	32275	0.996	187218396	CALCRL
2	187278776	187278975	2	187287328	187287661	>s77642>s77643>s77644>s77645>s77646>s77647>s77648>s77649>s77651	-0.0271144	0.000365102	2	187250671	-0.02584	0.045034	rs1569135	rs13424740	32275	0.996	187218396	CALCRL
2	187278776	187278975	2	187287328	187287661	>s77642>s77643>s77644>s77645>s77646>s77647>s77648>s77649>s77651	-0.0271144	0.000365102	2	187250671	-0.02584	0.045034	rs1569135	rs13424740	32275	0.996	187218396	CALCRL
2	187278776	187278975	2	187287328	187287661	>s77642>s77643>s77644>s77645>s77646>s77647>s77648>s77649>s77651	-0.0271144	0.000365102	2	187250671	-0.02584	0.045034	rs1569135	rs1569135	0	1	187250671	CALCRL
2	187278776	187278975	2	187287328	187287661	>s77642>s77643>s77644>s77645>s77646>s77647>s77648>s77649>s77651	-0.0271144	0.000365102	2	187250671	-0.02584	0.045034	rs1569135	rs1569135	0	1	187250671	CALCRL
2	187278776	187278975	2	187287328	187287661	>s77642>s77643>s77644>s77645>s77646>s77647>s77648>s77649>s77651	-0.0271144	0.000365102	2	187250671	-0.02584	0.045034	rs1569135	rs1569135	0	1	187250671	CALCRL
2	187278776	187278975	2	187287328	187287661	>s77642>s77643>s77644>s77645>s77646>s77647>s77648>s77649>s77651	-0.0271144	0.000365102	2	187250671	-0.02584	0.045034	rs1569135	rs1569135	0	1	187250671	CALCRL
2	187278776	187278975	2	187287328	187287661	>s77642>s77643>s77644>s77645>s77646>s77647>s77648>s77649>s77651	-0.0271144	0.000365102	2	187250671	-0.02584	0.045034	rs1569135	rs1569135	0	1	187250671	CALCRL
2	187278776	187278975	2	187287328	187287661	>s77642>s77643>s77644>s77645>s77646>s77647>s77648>s77649>s77651	-0.0271144	0.000365102	2	187250671	-0.02584	0.045034	rs1569135	rs1569135	0	1	187250671	CALCRL
2	187278776	187278975	2	187287328	187287661	>s77642>s77643>s77644>s77645>s77646>s77647>s77648>s77649>s77651	-0.0271144	0.000365102	2	187250671	-0.02584	0.045034	rs1569135	rs1569135	0	1	187250671	CALCRL
2	187278776	187278975	2	187287328	187287661	>s77642>s77643>s77644>s77645>s77646>s77647>s77648>s77649>s77651	-0.0271144	0.000365102	2	187250671	-0.02584	0.045034	rs1569135	rs1569135	0	1	187250671	CALCRL
2	187278776	187278975	2	187287328	187287661	>s77642>s77643>s77644>s77645>s77646>s77647>s77648>s77649>s77651	-0.0271144	0.000365102	2	187250671	-0.02584	0.045034	rs1569135	rs1569135	0	1	187250671	NR
2	187278776	187278975	2	187287328	187287661	>s77642>s77643>s77644>s77645>s77646>s77647>s77648>s77649>s77651	-0.0271144	0.000365102	2	187250671	-0.02584	0.045034	rs1569135	rs1569135	0	1	187250671	NA
2	187278776	187278975	2	187287328	187287661	>s77642>s77643>s77644>s77645>s77646>s77647>s77648>s77649>s77651	-0.0271144	0.000365102	2	187250671	-0.02584	0.045034	rs1569135	rs1569135	0	1	187250671	NR
2	187278776	187278975	2	187287328	187287661	>s77642>s77643>s77644>s77645>s77646>s77647>s77648>s77649>s77651	-0.0271144	0.000365102	2	187250671	-0.02584	0.045034	rs1569135	rs1569135	0	1	187250671	NR
2	187278776	187278975	2	187287328	187287661	>s77642>s77643>s77644>s77645>s77646>s77647>s77648>s77649>s77651	-0.0271144	0.000365102	2	187250671	-0.02584	0.045034	rs1569135	rs1569135	0	1	187250671	NR
21	36718783	36718982	21	36716861	36721123	>s602900	0.0574359	0.000393996	21	36784685	-0.05433	1	rs115593871	rs115593871	0	1	36784685	HLCS
15	28355840	28356039	15	28351314	28351377	*	0.0482023	0.000394686	15	28298733	0.02705	1	rs8023410	rs75165924	163621	0.963	28135112	HERC2
15	28355840	28356039	15	28351314	28351377	*	0.0482023	0.000394686	15	28298733	0.02705	1	rs8023410	rs8028689	54991	0.99	28243742	NR
15	28355840	28356039	15	28351314	28351377	*	0.0482023	0.000394686	15	28298733	0.02705	1	rs8023410	rs79097182	31882	0.988	28266851	HERC2
15	28355840	28356039	15	28351314	28351377	*	0.0482023	0.000394686	15	28298733	0.02705	1	rs8023410	rs79097182	31882	0.988	28266851	HERC2
15	28355840	28356039	15	28351314	28351377	*	0.0482023	0.000394686	15	28298733	0.02705	1	rs8023410	rs79097182	31882	0.988	28266851	HERC2
3	52497902	52498101	3	52499898	52499920	>s91013>s91014>s91015	0.0526813	0.000397968	3	52565776	0.03236	1	rs55946513	rs55946513	0	1	52565776	PBRM1
3	52497902	52498101	3	52499898	52499920	>s91013>s91014>s91015	0.0526813	0.000397968	3	52565776	0.03236	1	rs55946513	rs55946513	0	1	52565776	NA
19	12990391	12990590	19	12998451	12998451	*	-0.0542426	0.000422196	19	12971302	0.03777	1	rs118088980	rs62109874	3830	0.998	12967472	DAND5
18	79805824	79806023	18	79809501	79809550	>s740361<s891758>s740363>s740364>s740365>s740366>s530156>s721462>s530157	-0.0379895	0.000441545	18	79803334	-0.03664	0.0839478	rs11665567	rs71367544	11040	0.992	79814374	NR
18	79805824	79806023	18	79809501	79809550	>s740361<s891758>s740363>s740364>s740365>s740366>s530156>s721462>s530157	-0.0379895	0.000441545	18	79803334	-0.03664	0.0839478	rs11665567	rs71367544	11040	0.992	79814374	NR
18	79805824	79806023	18	79809501	79809550	>s740361<s891758>s740363>s740364>s740365>s740366>s530156>s721462>s530157	-0.0379895	0.000441545	18	79803334	-0.03664	0.0839478	rs11665567	rs71367544	11040	0.992	79814374	NR
18	79805824	79806023	18	79809501	79809550	>s740361<s891758>s740363>s740364>s740365>s740366>s530156>s721462>s530157	-0.0379895	0.000441545	18	79803334	-0.03664	0.0839478	rs11665567	rs71367545	13003	0.993	79816337	NA
18	79805824	79806023	18	79809501	79809550	>s740361<s891758>s740363>s740364>s740365>s740366>s530156>s721462>s530157	-0.0379895	0.000441545	18	79803334	-0.03664	0.0839478	rs11665567	rs71367545	13003	0.993	79816337	KCNG2
18	79805824	79806023	18	79809501	79809550	>s740361<s891758>s740363>s740364>s740365>s740366>s530156>s721462>s530157	-0.0379895	0.000441545	18	79803334	-0.03664	0.0839478	rs11665567	rs71367545	13003	0.993	79816337	NA
18	79805824	79806023	18	79809501	79809550	>s740361<s891758>s740363>s740364>s740365>s740366>s530156>s721462>s530157	-0.0379895	0.000441545	18	79803334	-0.03664	0.0839478	rs11665567	rs11664298	15652	0.992	79818986	ENSG00000267780
18	79805824	79806023	18	79809501	79809550	>s740361<s891758>s740363>s740364>s740365>s740366>s530156>s721462>s530157	-0.0379895	0.000441545	18	79803334	-0.03664	0.0839478	rs11665567	rs11664298	15652	0.992	79818986	KCNG2
18	79805824	79806023	18	79809501	79809550	>s740361<s891758>s740363>s740364>s740365>s740366>s530156>s721462>s530157	-0.0379895	0.000441545	18	79803334	-0.03664	0.0839478	rs11665567	rs7241572	17378	0.991	79820712	NR
18	79805824	79806023	18	79809501	79809550	>s740361<s891758>s740363>s740364>s740365>s740366>s530156>s721462>s530157	-0.0379895	0.000441545	18	79803334	-0.03664	0.0839478	rs11665567	rs7241572	17378	0.991	79820712	NR
18	79805824	79806023	18	79809501	79809550	>s740361<s891758>s740363>s740364>s740365>s740366>s530156>s721462>s530157	-0.0379895	0.000441545	18	79803334	-0.03664	0.0839478	rs11665567	rs7241572	17378	0.991	79820712	NR
18	79805824	79806023	18	79809501	79809550	>s740361<s891758>s740363>s740364>s740365>s740366>s530156>s721462>s530157	-0.0379895	0.000441545	18	79803334	-0.03664	0.0839478	rs11665567	rs7241572	17378	0.991	79820712	NA
10	12396554	12396753	10	12400036	12400118	>s323484	-0.0532493	0.000457104	10	12489159	0.04641	1	rs142920219	rs142920219	0	1	12489159	CAMK1D
4	178446472	178446671	4	178446486	178452993	>s138047	0.0538616	0.000461086	4	178365567	0.03072	1	rs7666286	rs7666286	0	1	178365567	LINC01098
3	190952670	190952869	3	190952332	190952332	*	0.0179658	0.000500149	3	190953006	-0.01752	0.040547	rs35327527	rs61500084	34046	0.986	190918960	NR
3	190952670	190952869	3	190952332	190952332	*	0.0179658	0.000500149	3	190953006	-0.01752	0.040547	rs35327527	rs61500084	34046	0.986	190918960	NR
3	190952670	190952869	3	190952332	190952332	*	0.0179658	0.000500149	3	190953006	-0.01752	0.040547	rs35327527	rs13066753	23608	0.986	190929398	NR
3	190952670	190952869	3	190952332	190952332	*	0.0179658	0.000500149	3	190953006	-0.01752	0.040547	rs35327527	rs13066753	23608	0.986	190929398	NR
3	190952670	190952869	3	190952332	190952332	*	0.0179658	0.000500149	3	190953006	-0.01752	0.040547	rs35327527	rs13066753	23608	0.986	190929398	NR
3	190952670	190952869	3	190952332	190952332	*	0.0179658	0.000500149	3	190953006	-0.01752	0.040547	rs35327527	rs13066753	23608	0.986	190929398	NA
3	190952670	190952869	3	190952332	190952332	*	0.0179658	0.000500149	3	190953006	-0.01752	0.040547	rs35327527	rs34859790	17965	0.987	190935041	NA
3	190952670	190952869	3	190952332	190952332	*	0.0179658	0.000500149	3	190953006	-0.01752	0.040547	rs35327527	rs34859790	17965	0.987	190935041	NA
3	190952670	190952869	3	190952332	190952332	*	0.0179658	0.000500149	3	190953006	-0.01752	0.040547	rs35327527	rs13089287	16371	0.986	190936635	NR
3	190952670	190952869	3	190952332	190952332	*	0.0179658	0.000500149	3	190953006	-0.01752	0.040547	rs35327527	rs1909960	15280	0.999	190937726	GMNC
3	190952670	190952869	3	190952332	190952332	*	0.0179658	0.000500149	3	190953006	-0.01752	0.040547	rs35327527	rs1909960	15280	0.999	190937726	KCNK3,SLC35F6,CENPA,DPYSL5,MAPRE3,TMEM214,AGBL5,OST4,EMILIN1,KHK,CGREF1,ABHD1,PREB,C2orf53,TCF23
3	190952670	190952869	3	190952332	190952332	*	0.0179658	0.000500149	3	190953006	-0.01752	0.040547	rs35327527	rs1316356	13632	0.999	190939374	GMNC
3	190952670	190952869	3	190952332	190952332	*	0.0179658	0.000500149	3	190953006	-0.01752	0.040547	rs35327527	rs905124	13435	0.999	190939571	NR
3	190952670	190952869	3	190952332	190952332	*	0.0179658	0.000500149	3	190953006	-0.01752	0.040547	rs35327527	rs35055419	7238	0.998	190945768	GMNC,SNAR-I,OSTN
3	190952670	190952869	3	190952332	190952332	*	0.0179658	0.000500149	3	190953006	-0.01752	0.040547	rs35327527	rs35055419	7238	0.998	190945768	OSTN
3	190952670	190952869	3	190952332	190952332	*	0.0179658	0.000500149	3	190953006	-0.01752	0.040547	rs35327527	rs1159211	4152	0.999	190948854	SNAR-I
3	190952670	190952869	3	190952332	190952332	*	0.0179658	0.000500149	3	190953006	-0.01752	0.040547	rs35327527	rs9877502	1277	0.998	190951729	UTS2D,SNAR-I,GEMC1,OSTNIL1-RAP,CCDC50
3	190952670	190952869	3	190952332	190952332	*	0.0179658	0.000500149	3	190953006	-0.01752	0.040547	rs35327527	rs34542080	262	1	190953268	NA
3	190952670	190952869	3	190952332	190952332	*	0.0179658	0.000500149	3	190953006	-0.01752	0.040547	rs35327527	rs35872768	2332	0.999	190955338	VIT,AC007382.1,STRN,HEATR5B
9	76306924	76306973	9	76306953	76307177	>s674766<s708350<s708349<s708348>s674768>s674769>s674770>s674771>s674772	0.0365277	0.00050169	9	76303180	0.03441	0.096634	rs72743110	rs11788518	718	0.997	76302462	PCSK5
10	746482	746681	10	737118	737147	>s320815<s776090>s320816>s320817>s1000303>s993905>s320820>s320821>s675801>s1043417>s675802>s320823>s320824>s320825>s320826>s320827>s320828>s320829>s320830>s320831>s320832>s675805>s320834	-0.0291447	0.000508198	10	725999	-0.02914	0.00215184	rs12773872	rs877282	407	0.997	725592	DIP2C
12	58059539	58059738	12	58064423	58064440	*	0.0171354	0.000541788	12	57991586	0.01588	0.0693256	rs12368024	rs4760364	75540	0.975	58067126	Intergenic
2	7028944	7029143	2	7032345	7032371	>s50796>s50798	0.0618436	0.000581519	2	7029072	0.05958	1	rs921621	rs3771962	9590	0.988	7019482	NA
22	36394426	36394625	22	36395659	36395659	>s833904	0.102338	0.000651964	22	36419520	0.09017	0.388516	rs76655075	rs79256915	11632	0.986	36407888	NR
11	62501949	62502148	11	62504576	62504576	*	0.0676421	0.000658096	11	62433010	-0.04531	1	rs145908530	rs145908530	0	1	62433010	NR
16	70942013	70942052	16	70943896	70945991	*	0.0480417	0.000667374	16	71036795	0.02605	1	rs10852481	rs113604943	5416	0.978	71031379	NA
19	50969996	50970195	19	50974964	50974964	*	0.0400717	0.000682839	19	50976466	-0.03436	1	rs57392237	rs57392237	0	1	50976466	NA
5	1133110	1133309	5	1130518	1130518	*	-0.036701	0.00069461	5	1203841	-0.02892	1	rs72709404	rs72709406	587	0.987	1204428	NR
16	8974127	8974326	16	8976109	8976193	>s476303	0.0691426	0.000712389	16	8926952	-0.04177	1	rs2437713	rs141361914	14658	0.992	8941610	NA
12	122121028	122121213	12	122121018	122121018	>s1250717	-0.0335575	0.000720104	12	122060096	-0.0221	0.515154	rs28384349	rs12314700	7959	0.977	122052137	NA
12	122121028	122121213	12	122121018	122121018	>s1250717	-0.0335575	0.000720104	12	122060096	-0.0221	0.515154	rs28384349	rs28384349	0	1	122060096	NR
12	122121028	122121213	12	122121018	122121018	>s1250717	-0.0335575	0.000720104	12	122060096	-0.0221	0.515154	rs28384349	rs28384349	0	1	122060096	BCL7A
12	122121028	122121213	12	122121018	122121018	>s1250717	-0.0335575	0.000720104	12	122060096	-0.0221	0.515154	rs28384349	rs28384349	0	1	122060096	BCL7A
12	122121028	122121213	12	122121018	122121018	>s1250717	-0.0335575	0.000720104	12	122060096	-0.0221	0.515154	rs28384349	rs28384349	0	1	122060096	BCL7A
12	122121028	122121213	12	122121018	122121018	>s1250717	-0.0335575	0.000720104	12	122060096	-0.0221	0.515154	rs28384349	rs28384349	0	1	122060096	BCL7A
5	152698340	152698539	5	152697354	152697373	<s905143	0.0423718	0.000721949	5	152792164	-0.03944	1	rs112108171	rs6579967	6714	1	152785450	NR
9	34704374	34704573	9	34703701	34703701	>s716611>s716612>s716613	-0.0331926	0.000797478	9	34710341	-0.03063	0.210906	rs11574914	rs2812378	78	0.996	34710263	CCL21
9	34704374	34704573	9	34703701	34703701	>s716611>s716612>s716613	-0.0331926	0.000797478	9	34710341	-0.03063	0.210906	rs11574914	rs2812378	78	0.996	34710263	CCL21
9	34704374	34704573	9	34703701	34703701	>s716611>s716612>s716613	-0.0331926	0.000797478	9	34710341	-0.03063	0.210906	rs11574914	rs2812378	78	0.996	34710263	CCL21
9	34704374	34704573	9	34703701	34703701	>s716611>s716612>s716613	-0.0331926	0.000797478	9	34710341	-0.03063	0.210906	rs11574914	rs2812378	78	0.996	34710263	CCL21
9	34704374	34704573	9	34703701	34703701	>s716611>s716612>s716613	-0.0331926	0.000797478	9	34710341	-0.03063	0.210906	rs11574914	rs2812378	78	0.996	34710263	CCL21,FAM205A
9	34704374	34704573	9	34703701	34703701	>s716611>s716612>s716613	-0.0331926	0.000797478	9	34710341	-0.03063	0.210906	rs11574914	rs2812378	78	0.996	34710263	CCL21
9	34704374	34704573	9	34703701	34703701	>s716611>s716612>s716613	-0.0331926	0.000797478	9	34710341	-0.03063	0.210906	rs11574914	rs2812378	78	0.996	34710263	CCL21
9	34704374	34704573	9	34703701	34703701	>s716611>s716612>s716613	-0.0331926	0.000797478	9	34710341	-0.03063	0.210906	rs11574914	rs2812378	78	0.996	34710263	CCL21
9	34704374	34704573	9	34703701	34703701	>s716611>s716612>s716613	-0.0331926	0.000797478	9	34710341	-0.03063	0.210906	rs11574914	rs11574914	0	1	34710341	CCL19,CCL21
9	34704374	34704573	9	34703701	34703701	>s716611>s716612>s716613	-0.0331926	0.000797478	9	34710341	-0.03063	0.210906	rs11574914	rs11574914	0	1	34710341	CCL19,CCL21
9	34704374	34704573	9	34703701	34703701	>s716611>s716612>s716613	-0.0331926	0.000797478	9	34710341	-0.03063	0.210906	rs11574914	rs11574914	0	1	34710341	CCL19,CCL21
9	34704374	34704573	9	34703701	34703701	>s716611>s716612>s716613	-0.0331926	0.000797478	9	34710341	-0.03063	0.210906	rs11574914	rs11574914	0	1	34710341	CCL19,CCL21
9	34704374	34704573	9	34703701	34703701	>s716611>s716612>s716613	-0.0331926	0.000797478	9	34710341	-0.03063	0.210906	rs11574914	rs11574914	0	1	34710341	NR
9	34704374	34704573	9	34703701	34703701	>s716611>s716612>s716613	-0.0331926	0.000797478	9	34710341	-0.03063	0.210906	rs11574914	rs11574914	0	1	34710341	NA
4	130077934	130078133	4	130082533	130083394	>s133180	0.0403067	0.000826308	4	130151013	-0.02403	1	rs10008557	rs10011007	7478	0.997	130143535	NR
16	68195052	68195251	16	68201820	68201870	<s738424	-0.0247023	0.000828303	16	68202838	-0.02443	0.0588363	rs55857142	rs79577483	199802	0.983	68003036	NA
16	68195052	68195251	16	68201820	68201870	<s738424	-0.0247023	0.000828303	16	68202838	-0.02443	0.0588363	rs55857142	rs4359427	33994	0.97	68168844	NFATC3
6	100745881	100746080	6	100746160	100746171	>s759550	0.0299758	0.000910963	6	100779722	-0.02911	0.0293831	rs12215909	rs9373590	15597	0.968	100764125	NR
19	6135065	6135264	19	6140224	6142182	>s533634	0.0208417	0.00102444	19	6116794	-0.01079	1	rs7253993	rs7253993	0	1	6116794	NR
19	6135065	6135264	19	6140224	6142182	>s533634	0.0208417	0.00102444	19	6116794	-0.01079	1	rs7253993	rs7256341	5462	0.979	6122256	NR
17	41988881	41989080	17	41993874	42000255	>s506826	-0.03088	0.00104443	17	41909233	0.01686	1	rs2304496	rs12952729	7791	0.998	41917024	NR
11	104125873	104126072	11	104119535	104119570	*	0.0888931	0.00105178	11	104110956	0.08062	0.186952	rs11226168	rs10895575	1178	0.999	104112134	NR
13	27533388	27533587	13	27533751	27533785	<s841866	0.035142	0.00111373	13	27532500	0.03343	0.165969	rs9581881	rs75783371	3324	0.989	27535824	NA
22	22298011	22298026	22	22298011	22298031	>s1068171	0.0212957	0.00112111	22	22206975	-0.01822	1	rs6001358	rs7287401	1510	0.997	22208485	NA
22	30079048	30079247	22	30071810	30071810	<s937773	-0.0965933	0.0011732	22	30036513	-0.07674	1	rs12627944	rs12330007	2838	0.99	30033675	NA
16	31105338	31105537	16	31098816	31098816	*	0.0436301	0.00119325	16	31138434	-0.02009	1	rs112766425	rs112766425	0	1	31138434	NR
5	164239441	164239507	5	164239442	164239442	>s671016	0.016695	0.00121102	5	164221345	0.01446	1	rs12518453	rs12518453	0	1	164221345	NR
19	49507996	49508195	19	49516821	49516912	>s549764	0.0541	0.00127174	19	49476141	-0.03994	1	rs17272847	rs17272847	0	1	49476141	NR
19	49507996	49508195	19	49516821	49516912	>s549764	0.0541	0.00127174	19	49476141	-0.03994	1	rs17272847	rs17272847	0	1	49476141	NR
19	49507996	49508195	19	49516821	49516912	>s549764	0.0541	0.00127174	19	49476141	-0.03994	1	rs17272847	rs17272847	0	1	49476141	FLT3LG
19	49507996	49508195	19	49516821	49516912	>s549764	0.0541	0.00127174	19	49476141	-0.03994	1	rs17272847	rs17272847	0	1	49476141	NR
19	49507996	49508195	19	49516821	49516912	>s549764	0.0541	0.00127174	19	49476141	-0.03994	1	rs17272847	rs17272847	0	1	49476141	NR
19	49507996	49508195	19	49516821	49516912	>s549764	0.0541	0.00127174	19	49476141	-0.03994	1	rs17272847	rs17272847	0	1	49476141	NR
12	7134048	7134247	12	7125978	7125978	*	0.059476	0.0013005	12	7073801	0.0397	1	rs12368181	rs12146727	10769	0.991	7063032	C1S
12	7134048	7134247	12	7125978	7125978	*	0.059476	0.0013005	12	7073801	0.0397	1	rs12368181	rs12146727	10769	0.991	7063032	C1S
12	7134048	7134247	12	7125978	7125978	*	0.059476	0.0013005	12	7073801	0.0397	1	rs12368181	rs12146727	10769	0.991	7063032	NA
12	7134048	7134247	12	7125978	7125978	*	0.059476	0.0013005	12	7073801	0.0397	1	rs12368181	rs12146727	10769	0.991	7063032	NA
12	7134048	7134247	12	7125978	7125978	*	0.059476	0.0013005	12	7073801	0.0397	1	rs12368181	rs12146727	10769	0.991	7063032	NA
12	7134048	7134247	12	7125978	7125978	*	0.059476	0.0013005	12	7073801	0.0397	1	rs12368181	rs16933084	9021	0.977	7064780	C1S
12	7134048	7134247	12	7125978	7125978	*	0.059476	0.0013005	12	7073801	0.0397	1	rs12368181	rs16933084	9021	0.977	7064780	NR
12	7134048	7134247	12	7125978	7125978	*	0.059476	0.0013005	12	7073801	0.0397	1	rs12368181	rs16933084	9021	0.977	7064780	NR
12	7134048	7134247	12	7125978	7125978	*	0.059476	0.0013005	12	7073801	0.0397	1	rs12368181	rs16933084	9021	0.977	7064780	NR
12	7134048	7134247	12	7125978	7125978	*	0.059476	0.0013005	12	7073801	0.0397	1	rs12368181	rs16933084	9021	0.977	7064780	NR
12	7134048	7134247	12	7125978	7125978	*	0.059476	0.0013005	12	7073801	0.0397	1	rs12368181	rs16933084	9021	0.977	7064780	NR
12	7134048	7134247	12	7125978	7125978	*	0.059476	0.0013005	12	7073801	0.0397	1	rs12368181	rs16933084	9021	0.977	7064780	NR
12	7134048	7134247	12	7125978	7125978	*	0.059476	0.0013005	12	7073801	0.0397	1	rs12368181	rs16933084	9021	0.977	7064780	NR
12	7134048	7134247	12	7125978	7125978	*	0.059476	0.0013005	12	7073801	0.0397	1	rs12368181	rs16933084	9021	0.977	7064780	NR
12	7134048	7134247	12	7125978	7125978	*	0.059476	0.0013005	12	7073801	0.0397	1	rs12368181	rs77620124	8203	0.978	7065598	C1S
12	7134048	7134247	12	7125978	7125978	*	0.059476	0.0013005	12	7073801	0.0397	1	rs12368181	rs11838267	5233	0.976	7068568	C1S
12	7134048	7134247	12	7125978	7125978	*	0.059476	0.0013005	12	7073801	0.0397	1	rs12368181	rs11838267	5233	0.976	7068568	C1S
12	7134048	7134247	12	7125978	7125978	*	0.059476	0.0013005	12	7073801	0.0397	1	rs12368181	rs10849546	4901	0.994	7068900	C1S
12	7134048	7134247	12	7125978	7125978	*	0.059476	0.0013005	12	7073801	0.0397	1	rs12368181	rs10849546	4901	0.994	7068900	NA
12	7134048	7134247	12	7125978	7125978	*	0.059476	0.0013005	12	7073801	0.0397	1	rs12368181	rs12371227	4127	0.995	7069674	NA
12	7134048	7134247	12	7125978	7125978	*	0.059476	0.0013005	12	7073801	0.0397	1	rs12368181	rs12371227	4127	0.995	7069674	NA
12	7134048	7134247	12	7125978	7125978	*	0.059476	0.0013005	12	7073801	0.0397	1	rs12368181	rs12368181	0	1	7073801	C1S
12	7134048	7134247	12	7125978	7125978	*	0.059476	0.0013005	12	7073801	0.0397	1	rs12368181	rs12368181	0	1	7073801	C1S
13	29459065	29459264	13	29457436	29457436	<s799528	-0.0330661	0.00130859	13	29448503	-0.03277	0.112317	rs74042086	rs4379923	1175	0.998	29447328	NR
18	31550273	31550472	18	31556409	31556494	>s522934	0.0554863	0.00132633	18	31617084	0.0382	1	rs9948445	rs113222817	19267	0.956	31636351	B4GALT6
18	31550273	31550472	18	31556409	31556494	>s522934	0.0554863	0.00132633	18	31617084	0.0382	1	rs9948445	rs113222817	19267	0.956	31636351	NA
8	75104780	75104897	8	75101940	75101940	*	0.0826688	0.00134051	8	75086861	0.06153	1	rs117598310	rs117598310	0	1	75086861	CRISPLD1
8	75104780	75104897	8	75101940	75101940	*	0.0826688	0.00134051	8	75086861	0.06153	1	rs117598310	rs117598310	0	1	75086861	CRISPLD1
11	46727576	46727775	11	46730796	46730796	<s1169498	0.0374908	0.0013866	11	46731408	0.03297	0.197217	rs3136482	rs3136448	8589	0.996	46722819	F2
11	46727576	46727775	11	46730796	46730796	<s1169498	0.0374908	0.0013866	11	46731408	0.03297	0.197217	rs3136482	rs61884307	2430	0.955	46733838	ACP2,AMBRA1,ARFGAP2,ARHGAP1,ATG13,C11orf49,CHRM4,CKAP5,CREB3L1,DDB2,DGKZ,F2,HARBI1,LOC101928943,LRP4,LRP4-AS1,MADD,MDK,MIR3160-1,MIR3160-2,MIR4688,MIR5582,MIR6745,MYBPC3,NR1H3,PACSIN3,SNORD67,ZNF408
11	46727576	46727775	11	46730796	46730796	<s1169498	0.0374908	0.0013866	11	46731408	0.03297	0.197217	rs3136482	rs9667108	182227	0.962	46913634	LRP4
14	106758912	106759111	14	106758167	106758175	>s678443>s678444>s678445>s678446>s445871>s445872>s445873>s445874	-0.0560414	0.00148683	14	106800988	-0.03932	1	rs2105997	rs2105997	0	1	106800988	IGHV4-39,HOMER2P1,IGHV4-61,IGHV3-64,IGHV3-66,IGHV1-69,IGHV3-72
20	61981587	61981786	20	61981967	61982124	>s575648	0.0326091	0.00149548	20	61981178	0.03133	1	rs6142696	rs2273991	31815	0.99	62012993	NR
8	144189789	144189988	8	144186501	144186501	*	0.0602297	0.00155315	8	144099319	0.0378	1	rs34674752	rs61732533	46071	0.969	144053248	NA
8	144189789	144189988	8	144186501	144186501	*	0.0602297	0.00155315	8	144099319	0.0378	1	rs34674752	rs61732533	46071	0.969	144053248	NA
8	144189789	144189988	8	144186501	144186501	*	0.0602297	0.00155315	8	144099319	0.0378	1	rs34674752	rs60394484	29609	0.978	144069710	NR
8	144189789	144189988	8	144186501	144186501	*	0.0602297	0.00155315	8	144099319	0.0378	1	rs34674752	rs60394484	29609	0.978	144069710	NR
1	78772159	78772358	1	78772436	78790955	>s13701	0.0304526	0.0015594	1	78702480	-0.02676	1	rs79687006	rs79687006	0	1	78702480	NA
7	158984025	158984224	7	158988686	158988686	*	0.073721	0.00156099	7	158952451	0.04134	1	rs262147	rs262147	0	1	158952451	intergenic
16	89539604	89539803	16	89541059	89541059	*	0.0457443	0.00156624	16	89581873	-0.02442	1	rs76751818	rs76751818	0	1	89581873	NR
17	5284035	5284234	17	5274827	5274903	>s496353	0.034821	0.00156789	17	5369285	0.02549	1	rs72634030	rs72634030	0	1	5369285	C1QBP
17	5284035	5284234	17	5274827	5274903	>s496353	0.034821	0.00156789	17	5369285	0.02549	1	rs72634030	rs72634030	0	1	5369285	C1QBP
20	33268002	33268201	20	33277023	33277023	*	0.0297336	0.00157069	20	33172744	0.02896	1	rs117186940	rs117186940	0	1	33172744	NR
20	33268002	33268201	20	33277023	33277023	*	0.0297336	0.00157069	20	33172744	0.02896	1	rs117186940	rs117186940	0	1	33172744	NA
20	33268002	33268201	20	33277023	33277023	*	0.0297336	0.00157069	20	33172744	0.02896	1	rs117186940	rs117186940	0	1	33172744	BPIFA2
2	238595457	238595656	2	238593077	238593091	>s83464	0.0171554	0.00157313	2	238595572	-0.01427	1	rs61125113	rs1510510	4878	0.993	238590694	HDAC4,ASB1
9	94625887	94626086	9	94625135	94625135	*	-0.0371234	0.00161929	9	94722722	0.0208	1	rs9987803	rs12337706	38150	0.993	94760872	NR
9	94625887	94626086	9	94625135	94625135	*	-0.0371234	0.00161929	9	94722722	0.0208	1	rs9987803	rs12337706	38150	0.993	94760872	NA
16	28793193	28793392	16	28795942	28795942	*	-0.0521042	0.00165045	16	28826752	-0.006511	1	rs12448482	rs28888764	8845	0.952	28817907	NR
16	28793193	28793392	16	28795942	28795942	*	-0.0521042	0.00165045	16	28826752	-0.006511	1	rs12448482	rs12448482	0	1	28826752	ATXN2L
16	28793193	28793392	16	28795942	28795942	*	-0.0521042	0.00165045	16	28826752	-0.006511	1	rs12448482	rs12448482	0	1	28826752	ATXN2L
16	28793193	28793392	16	28795942	28795942	*	-0.0521042	0.00165045	16	28826752	-0.006511	1	rs12448482	rs12448482	0	1	28826752	ATXN2L
16	28793193	28793392	16	28795942	28795942	*	-0.0521042	0.00165045	16	28826752	-0.006511	1	rs12448482	rs12448482	0	1	28826752	ATXN2L
16	28793193	28793392	16	28795942	28795942	*	-0.0521042	0.00165045	16	28826752	-0.006511	1	rs12448482	rs12448482	0	1	28826752	ATXN2L
16	28793193	28793392	16	28795942	28795942	*	-0.0521042	0.00165045	16	28826752	-0.006511	1	rs12448482	rs12448482	0	1	28826752	ATXN2L
16	28793193	28793392	16	28795942	28795942	*	-0.0521042	0.00165045	16	28826752	-0.006511	1	rs12448482	rs12448482	0	1	28826752	ATXN2L
16	28793193	28793392	16	28795942	28795942	*	-0.0521042	0.00165045	16	28826752	-0.006511	1	rs12448482	rs12448482	0	1	28826752	ATXN2L
16	28793193	28793392	16	28795942	28795942	*	-0.0521042	0.00165045	16	28826752	-0.006511	1	rs12448482	rs12448482	0	1	28826752	ATXN2L
16	28793193	28793392	16	28795942	28795942	*	-0.0521042	0.00165045	16	28826752	-0.006511	1	rs12448482	rs12448482	0	1	28826752	ATXN2L
16	28793193	28793392	16	28795942	28795942	*	-0.0521042	0.00165045	16	28826752	-0.006511	1	rs12448482	rs12448482	0	1	28826752	ATXN2L
16	28793193	28793392	16	28795942	28795942	*	-0.0521042	0.00165045	16	28826752	-0.006511	1	rs12448482	rs12448482	0	1	28826752	ATXN2L
16	28793193	28793392	16	28795942	28795942	*	-0.0521042	0.00165045	16	28826752	-0.006511	1	rs12448482	rs12448482	0	1	28826752	ATXN2L
16	28793193	28793392	16	28795942	28795942	*	-0.0521042	0.00165045	16	28826752	-0.006511	1	rs12448482	rs12448482	0	1	28826752	ATXN2L
16	28793193	28793392	16	28795942	28795942	*	-0.0521042	0.00165045	16	28826752	-0.006511	1	rs12448482	rs12448482	0	1	28826752	ATXN2L
16	28793193	28793392	16	28795942	28795942	*	-0.0521042	0.00165045	16	28826752	-0.006511	1	rs12448482	rs12448482	0	1	28826752	ATXN2L
16	28793193	28793392	16	28795942	28795942	*	-0.0521042	0.00165045	16	28826752	-0.006511	1	rs12448482	rs12448482	0	1	28826752	ATXN2L
16	28793193	28793392	16	28795942	28795942	*	-0.0521042	0.00165045	16	28826752	-0.006511	1	rs12448482	rs12448482	0	1	28826752	ATXN2L
16	28793193	28793392	16	28795942	28795942	*	-0.0521042	0.00165045	16	28826752	-0.006511	1	rs12448482	rs12448482	0	1	28826752	ATXN2L
16	28793193	28793392	16	28795942	28795942	*	-0.0521042	0.00165045	16	28826752	-0.006511	1	rs12448482	rs12448482	0	1	28826752	ATXN2L
16	28793193	28793392	16	28795942	28795942	*	-0.0521042	0.00165045	16	28826752	-0.006511	1	rs12448482	rs12448482	0	1	28826752	ATXN2L
16	28793193	28793392	16	28795942	28795942	*	-0.0521042	0.00165045	16	28826752	-0.006511	1	rs12448482	rs12448482	0	1	28826752	ATXN2L
16	28793193	28793392	16	28795942	28795942	*	-0.0521042	0.00165045	16	28826752	-0.006511	1	rs12448482	rs12448482	0	1	28826752	ATXN2L
16	28793193	28793392	16	28795942	28795942	*	-0.0521042	0.00165045	16	28826752	-0.006511	1	rs12448482	rs12448482	0	1	28826752	ATXN2L
16	28793193	28793392	16	28795942	28795942	*	-0.0521042	0.00165045	16	28826752	-0.006511	1	rs12448482	rs12448482	0	1	28826752	ATXN2L
16	28793193	28793392	16	28795942	28795942	*	-0.0521042	0.00165045	16	28826752	-0.006511	1	rs12448482	rs12448482	0	1	28826752	ATXN2L
16	28793193	28793392	16	28795942	28795942	*	-0.0521042	0.00165045	16	28826752	-0.006511	1	rs12448482	rs12448482	0	1	28826752	ATXN2L
16	28793193	28793392	16	28795942	28795942	*	-0.0521042	0.00165045	16	28826752	-0.006511	1	rs12448482	rs12448482	0	1	28826752	ATXN2L
16	28793193	28793392	16	28795942	28795942	*	-0.0521042	0.00165045	16	28826752	-0.006511	1	rs12448482	rs12448482	0	1	28826752	ATXN2L
16	28793193	28793392	16	28795942	28795942	*	-0.0521042	0.00165045	16	28826752	-0.006511	1	rs12448482	rs12448482	0	1	28826752	ATXN2L
16	28793193	28793392	16	28795942	28795942	*	-0.0521042	0.00165045	16	28826752	-0.006511	1	rs12448482	rs12448482	0	1	28826752	ATXN2L
16	28793193	28793392	16	28795942	28795942	*	-0.0521042	0.00165045	16	28826752	-0.006511	1	rs12448482	rs12448482	0	1	28826752	ATXN2L
16	28793193	28793392	16	28795942	28795942	*	-0.0521042	0.00165045	16	28826752	-0.006511	1	rs12448482	rs12448482	0	1	28826752	ATXN2L
16	28793193	28793392	16	28795942	28795942	*	-0.0521042	0.00165045	16	28826752	-0.006511	1	rs12448482	rs12448482	0	1	28826752	ATXN2L
16	28793193	28793392	16	28795942	28795942	*	-0.0521042	0.00165045	16	28826752	-0.006511	1	rs12448482	rs12448482	0	1	28826752	ATXN2L
16	28793193	28793392	16	28795942	28795942	*	-0.0521042	0.00165045	16	28826752	-0.006511	1	rs12448482	rs12448482	0	1	28826752	ATXN2L
16	28793193	28793392	16	28795942	28795942	*	-0.0521042	0.00165045	16	28826752	-0.006511	1	rs12448482	rs12448482	0	1	28826752	ATXN2L
16	28793193	28793392	16	28795942	28795942	*	-0.0521042	0.00165045	16	28826752	-0.006511	1	rs12448482	rs12448482	0	1	28826752	ATXN2L
16	28793193	28793392	16	28795942	28795942	*	-0.0521042	0.00165045	16	28826752	-0.006511	1	rs12448482	rs12448482	0	1	28826752	ATXN2L
16	28793193	28793392	16	28795942	28795942	*	-0.0521042	0.00165045	16	28826752	-0.006511	1	rs12448482	rs12448482	0	1	28826752	ATXN2L
16	28793193	28793392	16	28795942	28795942	*	-0.0521042	0.00165045	16	28826752	-0.006511	1	rs12448482	rs12448482	0	1	28826752	ATXN2L
16	28793193	28793392	16	28795942	28795942	*	-0.0521042	0.00165045	16	28826752	-0.006511	1	rs12448482	rs12448482	0	1	28826752	ATXN2L
16	28793193	28793392	16	28795942	28795942	*	-0.0521042	0.00165045	16	28826752	-0.006511	1	rs12448482	rs12448482	0	1	28826752	ATXN2L
16	28793193	28793392	16	28795942	28795942	*	-0.0521042	0.00165045	16	28826752	-0.006511	1	rs12448482	rs12448482	0	1	28826752	ATXN2L
16	28793193	28793392	16	28795942	28795942	*	-0.0521042	0.00165045	16	28826752	-0.006511	1	rs12448482	rs12448482	0	1	28826752	ATXN2L
16	28793193	28793392	16	28795942	28795942	*	-0.0521042	0.00165045	16	28826752	-0.006511	1	rs12448482	rs12448482	0	1	28826752	ATXN2L
16	28793193	28793392	16	28795942	28795942	*	-0.0521042	0.00165045	16	28826752	-0.006511	1	rs12448482	rs12448482	0	1	28826752	ATXN2L
16	28793193	28793392	16	28795942	28795942	*	-0.0521042	0.00165045	16	28826752	-0.006511	1	rs12448482	rs12448482	0	1	28826752	ATXN2L
16	28793193	28793392	16	28795942	28795942	*	-0.0521042	0.00165045	16	28826752	-0.006511	1	rs12448482	rs12448482	0	1	28826752	ATXN2L
16	28793193	28793392	16	28795942	28795942	*	-0.0521042	0.00165045	16	28826752	-0.006511	1	rs12448482	rs12448482	0	1	28826752	ATXN2L
16	28793193	28793392	16	28795942	28795942	*	-0.0521042	0.00165045	16	28826752	-0.006511	1	rs12448482	rs12448482	0	1	28826752	ATXN2L
5	128418767	128418966	5	128413399	128413489	>s164650	0.0364029	0.00172082	5	128339663	0.02045	1	rs3909897	rs10057855	1010	1	128340673	FBN2
11	8808429	8808628	11	8818099	8818116	>s352433>s352434>s352435>s707905>s352438>s352439>s352440	0.0329938	0.00174234	11	8882396	0.03286	1	rs34105455	rs34105455	0	1	8882396	ST5
2	36183028	36183106	2	36184177	36184217	>s694344<s1064285>s694345>s694346>s694347>s694348>s54181>s54182>s54183>s54184>s54185>s54186>s54187>s54188>s694349>s54189>s694350>s54191	-0.0986947	0.00178397	2	36173588	0.03896	1	rs78209880	rs78209880	0	1	36173588	Intergenic
6	34371929	34372128	6	34372015	34373342	>s175857<s739233	-0.0326986	0.00181077	6	34410446	-0.0286	0.161641	rs28847046	rs12662905	42938	0.984	34367508	NR
6	34371929	34372128	6	34372015	34373342	>s175857<s739233	-0.0326986	0.00181077	6	34410446	-0.0286	0.161641	rs28847046	rs12664016	4574	0.986	34405872	NR
6	34371929	34372128	6	34372015	34373342	>s175857<s739233	-0.0326986	0.00181077	6	34410446	-0.0286	0.161641	rs28847046	rs28847046	0	1	34410446	RPS10
1	8340917	8341116	1	8338652	8338709	>s5369	0.0269707	0.00184574	1	8287541	-0.01799	1	rs707481	rs438895	9246	0.97	8278295	intergenic
13	114111329	114111528	13	114103903	114104018	<s1658059>s1732744<s1658058<s1657626>s419355>s419356>s419368	-0.159984	0.00185052	13	114101612	-0.153	0.00567112	rs61971965	rs61971965	0	1	114101612	RASA3
13	113167124	113167323	13	113162392	113162779	>s1244259>s417959	0.0427627	0.00189435	13	113158648	0.04219	1	rs2273971	rs2273971	0	1	113158648	PROZ
13	100596938	100597137	13	100589824	100590126	>s414847	0.0271581	0.00197389	13	100537136	-0.01342	1	rs75326614	rs117969561	21799	0.982	100558935	Intergenic
12	111529041	111529240	12	111534603	111534603	*	0.0468711	0.00199277	12	111439498	-0.02725	1	rs111442488	rs2239196	4135	1	111435363	SH2B3
12	111529041	111529240	12	111534603	111534603	*	0.0468711	0.00199277	12	111439498	-0.02725	1	rs111442488	rs2239196	4135	1	111435363	NA
12	111529041	111529240	12	111534603	111534603	*	0.0468711	0.00199277	12	111439498	-0.02725	1	rs111442488	rs16941541	76402	0.985	111515900	NA
12	78804737	78804910	12	78804642	78804655	>s382721	0.0237333	0.00214632	12	78827261	-0.02127	0.246041	rs4842303	rs4842407	19968	0.962	78807293	LOC642550
1	40312693	40312892	1	40320762	40320895	>s10052	0.0551724	0.00214855	1	40377261	0.03485	1	rs76904272	rs76904272	0	1	40377261	SMAP2
1	40312693	40312892	1	40320762	40320895	>s10052	0.0551724	0.00214855	1	40377261	0.03485	1	rs76904272	rs79904641	4889	1	40382150	SMAP2
22	50065300	50065499	22	50063786	50063835	>s637667>s637669	0.0406693	0.00215708	22	50069920	0.04063	0.135553	rs5771351	rs5771348	2765	1	50067155	NR
6	149985059	149985258	6	149981527	149981673	*	-0.0467376	0.00234086	6	149979592	-0.03903	0.102221	rs6557225	rs1853665	1886	0.996	149977706	ULBP1
6	149985059	149985258	6	149981527	149981673	*	-0.0467376	0.00234086	6	149979592	-0.03903	0.102221	rs6557225	rs1853665	1886	0.996	149977706	ULBP2
6	149985059	149985258	6	149981527	149981673	*	-0.0467376	0.00234086	6	149979592	-0.03903	0.102221	rs6557225	rs4869780	1620	0.968	149981212	NA
6	149985059	149985258	6	149981527	149981673	*	-0.0467376	0.00234086	6	149979592	-0.03903	0.102221	rs6557225	rs4869780	1620	0.968	149981212	NA
6	149985059	149985258	6	149981527	149981673	*	-0.0467376	0.00234086	6	149979592	-0.03903	0.102221	rs6557225	rs4869780	1620	0.968	149981212	NA
3	48731226	48731425	3	48734808	48734886	>s90636	0.0336241	0.00235015	3	48697428	0.01644	1	rs80026423	rs80026423	0	1	48697428	NR
3	10971317	10971516	3	10972897	10972984	>s87035	0.0344679	0.00242741	3	10946371	0.02977	1	rs79198916	rs79198916	0	1	10946371	SLC6A11,SLC6A1
1	150744801	150745000	1	150743671	150743685	>s35859	-0.0433236	0.00252193	1	150700500	-0.01834	1	rs56057831	rs144984465	35985	0.986	150664515	GOLPH3L
8	142124722	142124921	8	142130408	142130408	*	0.0299611	0.00252955	8	142099066	0.01747	1	rs77160407	rs74702439	532	0.988	142098534	NR
8	142124722	142124921	8	142130408	142130408	*	0.0299611	0.00252955	8	142099066	0.01747	1	rs77160407	rs74702439	532	0.988	142098534	Intergenic
1	8346162	8346361	1	8344813	8344892	>s5373>s5374>s5375	0.0433726	0.00256637	1	8314193	0.0317	1	rs72635790	rs72635790	0	1	8314193	NA
20	32169563	32169762	20	32177142	32177142	>s737111>s737112>s737113	-0.0249081	0.00260865	20	32267943	-0.02059	1	rs6087358	rs6087358	0	1	32267943	KIF3B
20	32169563	32169762	20	32177142	32177142	>s737111>s737112>s737113	-0.0249081	0.00260865	20	32267943	-0.02059	1	rs6087358	rs6087358	0	1	32267943	NA
20	32169563	32169762	20	32177142	32177142	>s737111>s737112>s737113	-0.0249081	0.00260865	20	32267943	-0.02059	1	rs6087358	rs6058638	44968	0.995	32312911	KIF3B
20	32169563	32169762	20	32177142	32177142	>s737111>s737112>s737113	-0.0249081	0.00260865	20	32267943	-0.02059	1	rs6087358	rs80188179	153558	0.977	32421501	NA
1	50886532	50886731	1	50885312	50885312	*	-0.0327873	0.00261294	1	50968015	0.02964	1	rs3176447	rs12086130	260084	0.956	50707931	FAF1
1	50886532	50886731	1	50885312	50885312	*	-0.0327873	0.00261294	1	50968015	0.02964	1	rs3176447	rs12086130	260084	0.956	50707931	FAF1
1	50886532	50886731	1	50885312	50885312	*	-0.0327873	0.00261294	1	50968015	0.02964	1	rs3176447	rs12086130	260084	0.956	50707931	FAF1
1	50886532	50886731	1	50885312	50885312	*	-0.0327873	0.00261294	1	50968015	0.02964	1	rs3176447	rs12086130	260084	0.956	50707931	FAF1
1	50886532	50886731	1	50885312	50885312	*	-0.0327873	0.00261294	1	50968015	0.02964	1	rs3176447	rs11205766	241752	0.956	50726263	FAF1
1	50886532	50886731	1	50885312	50885312	*	-0.0327873	0.00261294	1	50968015	0.02964	1	rs3176447	rs12074850	185371	0.955	50782644	FAF1
1	50886532	50886731	1	50885312	50885312	*	-0.0327873	0.00261294	1	50968015	0.02964	1	rs3176447	rs3789588	167164	0.952	50800851	FAF1
1	50886532	50886731	1	50885312	50885312	*	-0.0327873	0.00261294	1	50968015	0.02964	1	rs3176447	rs58795848	150177	0.95	50817838	NA
1	50886532	50886731	1	50885312	50885312	*	-0.0327873	0.00261294	1	50968015	0.02964	1	rs3176447	rs72904749	66267	0.958	50901748	NA
1	50886532	50886731	1	50885312	50885312	*	-0.0327873	0.00261294	1	50968015	0.02964	1	rs3176447	rs60244988	59079	0.951	50908936	NA
1	50886532	50886731	1	50885312	50885312	*	-0.0327873	0.00261294	1	50968015	0.02964	1	rs3176447	rs12085666	42118	0.958	50925897	NA
1	50886532	50886731	1	50885312	50885312	*	-0.0327873	0.00261294	1	50968015	0.02964	1	rs3176447	rs12095997	41842	0.952	50926173	NR
1	50886532	50886731	1	50885312	50885312	*	-0.0327873	0.00261294	1	50968015	0.02964	1	rs3176447	rs12095997	41842	0.952	50926173	NR
1	50886532	50886731	1	50885312	50885312	*	-0.0327873	0.00261294	1	50968015	0.02964	1	rs3176447	rs12095997	41842	0.952	50926173	NR
1	50886532	50886731	1	50885312	50885312	*	-0.0327873	0.00261294	1	50968015	0.02964	1	rs3176447	rs12095997	41842	0.952	50926173	NR
1	50886532	50886731	1	50885312	50885312	*	-0.0327873	0.00261294	1	50968015	0.02964	1	rs3176447	rs3176447	0	1	50968015	NA
1	50886532	50886731	1	50885312	50885312	*	-0.0327873	0.00261294	1	50968015	0.02964	1	rs3176447	rs3176447	0	1	50968015	NA
1	50886532	50886731	1	50885312	50885312	*	-0.0327873	0.00261294	1	50968015	0.02964	1	rs3176447	rs3176447	0	1	50968015	NA
1	50886532	50886731	1	50885312	50885312	*	-0.0327873	0.00261294	1	50968015	0.02964	1	rs3176447	rs3176466	4678	0.958	50972693	NR
1	50886532	50886731	1	50885312	50885312	*	-0.0327873	0.00261294	1	50968015	0.02964	1	rs3176447	rs3176466	4678	0.958	50972693	CDKN2C
1	50886532	50886731	1	50885312	50885312	*	-0.0327873	0.00261294	1	50968015	0.02964	1	rs3176447	rs3176468	5194	0.951	50973209	CDKN2C
1	50886532	50886731	1	50885312	50885312	*	-0.0327873	0.00261294	1	50968015	0.02964	1	rs3176447	rs3176468	5194	0.951	50973209	CDKN2C
1	50886532	50886731	1	50885312	50885312	*	-0.0327873	0.00261294	1	50968015	0.02964	1	rs3176447	rs3176468	5194	0.951	50973209	CDKN2C
1	50886532	50886731	1	50885312	50885312	*	-0.0327873	0.00261294	1	50968015	0.02964	1	rs3176447	rs3176468	5194	0.951	50973209	CDKN2C
1	50886532	50886731	1	50885312	50885312	*	-0.0327873	0.00261294	1	50968015	0.02964	1	rs3176447	rs12855	6406	0.954	50974421	NR
3	54962001	54962200	3	54968574	54968662	>s91163	0.0817737	0.00261674	3	54866828	-0.05827	1	rs1880828	rs1880828	0	1	54866828	CACNA2D3
5	153343067	153343266	5	153337247	153337248	>s1028465	-0.0595213	0.00261983	5	153269853	-0.0587	0.0103985	rs1824311	rs3112530	9736	0.981	153260117	GRIA1
21	43508651	43508850	21	43513001	43513202	>s604355	0.0301756	0.002643	21	43592595	0.003297	1	rs1454651	rs2051407	66769	0.988	43659364	NR
21	43508651	43508850	21	43513001	43513202	>s604355	0.0301756	0.002643	21	43592595	0.003297	1	rs1454651	rs2051407	66769	0.988	43659364	NR
21	43508651	43508850	21	43513001	43513202	>s604355	0.0301756	0.002643	21	43592595	0.003297	1	rs1454651	rs2051407	66769	0.988	43659364	HSF2BP
4	75825091	75825290	4	75823370	75823411	>s128654>s128655>s128656	0.0571939	0.00265035	4	75733246	-0.04176	1	rs34868353	rs34868353	0	1	75733246	USO1
8	20034158	20034357	8	20027566	20036424	>s229220>s229221>s229222	-0.0328452	0.00270947	8	20099239	-0.02989	1	rs147371424	rs117535105	5526	0.975	20104765	NA
8	20034158	20034357	8	20027566	20036424	>s229220>s229221>s229222	-0.0328452	0.00270947	8	20099239	-0.02989	1	rs147371424	rs117535105	5526	0.975	20104765	NA
17	74833626	74833825	17	74829166	74829166	*	0.0432355	0.00277753	17	74851760	0.02145	1	rs11575878	rs11575878	0	1	74851760	GRIN2C
14	35338782	35338981	14	35329571	35329706	>s437068	0.0302176	0.00283072	14	35392295	-0.02504	1	rs72642574	rs111597524	299	1	35392594	NFKBIA
8	144128484	144128683	8	144125720	144125721	<s1505688	0.0286768	0.00287098	8	144116956	0.02835	0.0143141	rs6985623	rs13256214	22036	0.956	144094920	NR
8	144128484	144128683	8	144125720	144125721	<s1505688	0.0286768	0.00287098	8	144116956	0.02835	0.0143141	rs6985623	rs6984764	21999	0.956	144094957	CYC1
8	144128484	144128683	8	144125720	144125721	<s1505688	0.0286768	0.00287098	8	144116956	0.02835	0.0143141	rs6985623	rs6984764	21999	0.956	144094957	CYC1
8	144128484	144128683	8	144125720	144125721	<s1505688	0.0286768	0.00287098	8	144116956	0.02835	0.0143141	rs6985623	rs12550729	16451	0.96	144100505	OPLAH
8	144128484	144128683	8	144125720	144125721	<s1505688	0.0286768	0.00287098	8	144116956	0.02835	0.0143141	rs6985623	rs114634117	7395	0.995	144124351	NR
8	144128484	144128683	8	144125720	144125721	<s1505688	0.0286768	0.00287098	8	144116956	0.02835	0.0143141	rs6985623	rs114634117	7395	0.995	144124351	NA
16	85821151	85821323	16	85831140	85831140	*	0.0342628	0.00294805	16	85895099	-0.03407	1	rs12149363	rs12922615	2010	0.96	85893089	NA
16	85821151	85821323	16	85831140	85831140	*	0.0342628	0.00294805	16	85895099	-0.03407	1	rs12149363	rs12149363	0	1	85895099	NR
2	102314917	102315116	2	102311865	102311865	<s731645	0.0529488	0.00295498	2	102324577	0.04413	0.344259	rs11679893	rs72823641	4878	0.995	102319699	IL1R1,IL1RL1,IL1RL2,IL18R1,IL18RAP,MIR4772,SLC9A2,SLC9A4
2	102314917	102315116	2	102311865	102311865	<s731645	0.0529488	0.00295498	2	102324577	0.04413	0.344259	rs11679893	rs72823641	4878	0.995	102319699	IL1R1
2	102314917	102315116	2	102311865	102311865	<s731645	0.0529488	0.00295498	2	102324577	0.04413	0.344259	rs11679893	rs72823641	4878	0.995	102319699	IL1R1,IL1RL1,IL1RL2,IL18R1,IL18RAP,MIR4772,SLC9A2,SLC9A4
2	102314917	102315116	2	102311865	102311865	<s731645	0.0529488	0.00295498	2	102324577	0.04413	0.344259	rs11679893	rs72823641	4878	0.995	102319699	IL18R1
2	102314917	102315116	2	102311865	102311865	<s731645	0.0529488	0.00295498	2	102324577	0.04413	0.344259	rs11679893	rs72823641	4878	0.995	102319699	IL18R1
2	102314917	102315116	2	102311865	102311865	<s731645	0.0529488	0.00295498	2	102324577	0.04413	0.344259	rs11679893	rs72823641	4878	0.995	102319699	IL18R1
2	102314917	102315116	2	102311865	102311865	<s731645	0.0529488	0.00295498	2	102324577	0.04413	0.344259	rs11679893	rs72823641	4878	0.995	102319699	IL1RL1,IL1RL2,IL18R1
2	102314917	102315116	2	102311865	102311865	<s731645	0.0529488	0.00295498	2	102324577	0.04413	0.344259	rs11679893	rs72823641	4878	0.995	102319699	IL1RL1,IL1RL2,IL18R1
2	102314917	102315116	2	102311865	102311865	<s731645	0.0529488	0.00295498	2	102324577	0.04413	0.344259	rs11679893	rs72823641	4878	0.995	102319699	NR
2	102314917	102315116	2	102311865	102311865	<s731645	0.0529488	0.00295498	2	102324577	0.04413	0.344259	rs11679893	rs72823641	4878	0.995	102319699	IL1RL1,IL18R1
2	102314917	102315116	2	102311865	102311865	<s731645	0.0529488	0.00295498	2	102324577	0.04413	0.344259	rs11679893	rs72823641	4878	0.995	102319699	IL1RL1,IL18R1
2	102314917	102315116	2	102311865	102311865	<s731645	0.0529488	0.00295498	2	102324577	0.04413	0.344259	rs11679893	rs72823641	4878	0.995	102319699	NR
2	102314917	102315116	2	102311865	102311865	<s731645	0.0529488	0.00295498	2	102324577	0.04413	0.344259	rs11679893	rs72823641	4878	0.995	102319699	IL1R1,IL1R2,IL1RL1,IL1RL2,IL18R1,IL18RAP,LINC01127,MAP4K4,MIR4772,SLC9A2,SLC9A4
2	102314917	102315116	2	102311865	102311865	<s731645	0.0529488	0.00295498	2	102324577	0.04413	0.344259	rs11679893	rs72823641	4878	0.995	102319699	NR
2	102314917	102315116	2	102311865	102311865	<s731645	0.0529488	0.00295498	2	102324577	0.04413	0.344259	rs11679893	rs72823641	4878	0.995	102319699	IL1RL1,IL18R1,IL1RL2,IL18RAP,MIR4772,IL1R1
2	102314917	102315116	2	102311865	102311865	<s731645	0.0529488	0.00295498	2	102324577	0.04413	0.344259	rs11679893	rs72823641	4878	0.995	102319699	IL1RL1
2	102314917	102315116	2	102311865	102311865	<s731645	0.0529488	0.00295498	2	102324577	0.04413	0.344259	rs11679893	rs72823641	4878	0.995	102319699	NA
2	102314917	102315116	2	102311865	102311865	<s731645	0.0529488	0.00295498	2	102324577	0.04413	0.344259	rs11679893	rs10865050	274	1	102324851	IL18R1
2	102314917	102315116	2	102311865	102311865	<s731645	0.0529488	0.00295498	2	102324577	0.04413	0.344259	rs11679893	rs10865050	274	1	102324851	NR
2	102314917	102315116	2	102311865	102311865	<s731645	0.0529488	0.00295498	2	102324577	0.04413	0.344259	rs11679893	rs59185885	3209	0.995	102327786	NA
2	102314917	102315116	2	102311865	102311865	<s731645	0.0529488	0.00295498	2	102324577	0.04413	0.344259	rs11679893	rs59185885	3209	0.995	102327786	NA
2	102314917	102315116	2	102311865	102311865	<s731645	0.0529488	0.00295498	2	102324577	0.04413	0.344259	rs11679893	rs59185885	3209	0.995	102327786	NR
2	102314917	102315116	2	102311865	102311865	<s731645	0.0529488	0.00295498	2	102324577	0.04413	0.344259	rs11679893	rs59185885	3209	0.995	102327786	NR
2	102314917	102315116	2	102311865	102311865	<s731645	0.0529488	0.00295498	2	102324577	0.04413	0.344259	rs11679893	rs3771180	12580	0.996	102337157	IL1RL1
2	102314917	102315116	2	102311865	102311865	<s731645	0.0529488	0.00295498	2	102324577	0.04413	0.344259	rs11679893	rs3771180	12580	0.996	102337157	IL1RL1,IL1RL,IL18R1
2	102314917	102315116	2	102311865	102311865	<s731645	0.0529488	0.00295498	2	102324577	0.04413	0.344259	rs11679893	rs3771180	12580	0.996	102337157	IL1RL1
2	102314917	102315116	2	102311865	102311865	<s731645	0.0529488	0.00295498	2	102324577	0.04413	0.344259	rs11679893	rs3771180	12580	0.996	102337157	IL1RL1
2	102314917	102315116	2	102311865	102311865	<s731645	0.0529488	0.00295498	2	102324577	0.04413	0.344259	rs11679893	rs13408661	14045	0.998	102338622	IL18R1,IL1RL1
2	102314917	102315116	2	102311865	102311865	<s731645	0.0529488	0.00295498	2	102324577	0.04413	0.344259	rs11679893	rs3771175	19173	0.988	102343750	IL18R1,IL1RL1,IL18RAP
2	102314917	102315116	2	102311865	102311865	<s731645	0.0529488	0.00295498	2	102324577	0.04413	0.344259	rs11679893	rs3771175	19173	0.988	102343750	NR
2	102314917	102315116	2	102311865	102311865	<s731645	0.0529488	0.00295498	2	102324577	0.04413	0.344259	rs11679893	rs3771175	19173	0.988	102343750	NR
2	102314917	102315116	2	102311865	102311865	<s731645	0.0529488	0.00295498	2	102324577	0.04413	0.344259	rs11679893	rs3771175	19173	0.988	102343750	NA
2	102314917	102315116	2	102311865	102311865	<s731645	0.0529488	0.00295498	2	102324577	0.04413	0.344259	rs11679893	rs10197862	25512	0.982	102350089	IL1RL1
2	102314917	102315116	2	102311865	102311865	<s731645	0.0529488	0.00295498	2	102324577	0.04413	0.344259	rs11679893	rs10197862	25512	0.982	102350089	IL18R1,IL1RL1
2	102314917	102315116	2	102311865	102311865	<s731645	0.0529488	0.00295498	2	102324577	0.04413	0.344259	rs11679893	rs10197862	25512	0.982	102350089	IL1RL1
2	102314917	102315116	2	102311865	102311865	<s731645	0.0529488	0.00295498	2	102324577	0.04413	0.344259	rs11679893	rs11679146	68375	0.951	102392952	IL18R1
2	102314917	102315116	2	102311865	102311865	<s731645	0.0529488	0.00295498	2	102324577	0.04413	0.344259	rs11679893	rs11679146	68375	0.951	102392952	NA
2	102314917	102315116	2	102311865	102311865	<s731645	0.0529488	0.00295498	2	102324577	0.04413	0.344259	rs11679893	rs11465702	116855	0.95	102441432	NR
2	241887973	241888172	2	241888627	241888712	>s85192>s85193>s85194	-0.0612072	0.0030344	2	241800856	-0.04995	1	rs115572130	rs115572130	0	1	241800856	NR
2	10005692	10005891	2	9998612	9998628	>s51254>s51255>s51256>s51257>s51258>s51259>s51260>s51261>s51262>s51263>s51264>s694255>s694256	-0.0446103	0.00303443	2	9952874	-0.03506	1	rs73913928	rs73913932	1523	0.973	9954397	GRHL1
2	10005692	10005891	2	9998612	9998628	>s51254>s51255>s51256>s51257>s51258>s51259>s51260>s51261>s51262>s51263>s51264>s694255>s694256	-0.0446103	0.00303443	2	9952874	-0.03506	1	rs73913928	rs73913932	1523	0.973	9954397	NR
10	45577386	45577585	10	45584134	45593192	>s337235>s337236>s337238>s337239<s1001068>s337240>s337241>s337242>s337243	-0.0331593	0.00303599	10	45510176	-0.0329	0.118279	rs71494802	rs76493570	56370	0.989	45453806	RP11-67C2.2
10	45577386	45577585	10	45584134	45593192	>s337235>s337236>s337238>s337239<s1001068>s337240>s337241>s337242>s337243	-0.0331593	0.00303599	10	45510176	-0.0329	0.118279	rs71494802	rs76493570	56370	0.989	45453806	RP11-67C2.2
10	45577386	45577585	10	45584134	45593192	>s337235>s337236>s337238>s337239<s1001068>s337240>s337241>s337242>s337243	-0.0331593	0.00303599	10	45510176	-0.0329	0.118279	rs71494802	rs34731408	44604	0.991	45465572	NR
10	45577386	45577585	10	45584134	45593192	>s337235>s337236>s337238>s337239<s1001068>s337240>s337241>s337242>s337243	-0.0331593	0.00303599	10	45510176	-0.0329	0.118279	rs71494802	rs17157836	42038	0.973	45468138	NR
10	45577386	45577585	10	45584134	45593192	>s337235>s337236>s337238>s337239<s1001068>s337240>s337241>s337242>s337243	-0.0331593	0.00303599	10	45510176	-0.0329	0.118279	rs71494802	rs12761399	40539	0.973	45469637	NR
10	45577386	45577585	10	45584134	45593192	>s337235>s337236>s337238>s337239<s1001068>s337240>s337241>s337242>s337243	-0.0331593	0.00303599	10	45510176	-0.0329	0.118279	rs71494802	rs901683	39202	0.973	45470974	2024-03-08
10	45577386	45577585	10	45584134	45593192	>s337235>s337236>s337238>s337239<s1001068>s337240>s337241>s337242>s337243	-0.0331593	0.00303599	10	45510176	-0.0329	0.118279	rs71494802	rs901683	39202	0.973	45470974	2024-03-08
10	45577386	45577585	10	45584134	45593192	>s337235>s337236>s337238>s337239<s1001068>s337240>s337241>s337242>s337243	-0.0331593	0.00303599	10	45510176	-0.0329	0.118279	rs71494802	rs901683	39202	0.973	45470974	2024-03-08
10	45577386	45577585	10	45584134	45593192	>s337235>s337236>s337238>s337239<s1001068>s337240>s337241>s337242>s337243	-0.0331593	0.00303599	10	45510176	-0.0329	0.118279	rs71494802	rs34285816	28773	0.974	45481403	NA
10	45577386	45577585	10	45584134	45593192	>s337235>s337236>s337238>s337239<s1001068>s337240>s337241>s337242>s337243	-0.0331593	0.00303599	10	45510176	-0.0329	0.118279	rs71494802	rs71494791	27293	0.974	45482883	NR
10	45577386	45577585	10	45584134	45593192	>s337235>s337236>s337238>s337239<s1001068>s337240>s337241>s337242>s337243	-0.0331593	0.00303599	10	45510176	-0.0329	0.118279	rs71494802	rs71494791	27293	0.974	45482883	NR
10	45577386	45577585	10	45584134	45593192	>s337235>s337236>s337238>s337239<s1001068>s337240>s337241>s337242>s337243	-0.0331593	0.00303599	10	45510176	-0.0329	0.118279	rs71494802	rs71494791	27293	0.974	45482883	NR
10	45577386	45577585	10	45584134	45593192	>s337235>s337236>s337238>s337239<s1001068>s337240>s337241>s337242>s337243	-0.0331593	0.00303599	10	45510176	-0.0329	0.118279	rs71494802	rs71494791	27293	0.974	45482883	NR
10	45577386	45577585	10	45584134	45593192	>s337235>s337236>s337238>s337239<s1001068>s337240>s337241>s337242>s337243	-0.0331593	0.00303599	10	45510176	-0.0329	0.118279	rs71494802	rs71494799	2768	0.992	45507408	NA
10	45577386	45577585	10	45584134	45593192	>s337235>s337236>s337238>s337239<s1001068>s337240>s337241>s337242>s337243	-0.0331593	0.00303599	10	45510176	-0.0329	0.118279	rs71494802	rs71494802	0	1	45510176	2024-03-08
10	45577386	45577585	10	45584134	45593192	>s337235>s337236>s337238>s337239<s1001068>s337240>s337241>s337242>s337243	-0.0331593	0.00303599	10	45510176	-0.0329	0.118279	rs71494802	rs34897497	19053	0.993	45529229	NR
22	31807793	31807992	22	31801220	31801322	>s633148	0.0406128	0.00305694	22	31745325	-0.02412	1	rs62238886	rs62238885	3173	0.999	31742152	DEPDC5
1	26980943	26981142	1	26977301	26979858	>s8339	0.0622646	0.00308604	1	26976355	-0.06144	1	rs35427438	rs6658653	22686	0.983	26999041	TRNP1
1	22862102	22862301	1	22872114	22872197	>s7763	0.0839339	0.00309241	1	22948304	-0.0545	1	rs116274150	rs116274150	0	1	22948304	LACTBL1
1	22862102	22862301	1	22872114	22872197	>s7763	0.0839339	0.00309241	1	22948304	-0.0545	1	rs116274150	rs4372224	12722	0.969	22961026	NR
9	100084780	100084979	9	100087014	100087014	*	0.0444078	0.00311746	9	99990565	-0.03695	1	rs10988935	rs10988944	21368	0.999	100011933	NR
9	100084780	100084979	9	100087014	100087014	*	0.0444078	0.00311746	9	99990565	-0.03695	1	rs10988935	rs7028939	55838	0.999	100046403	ERP44
16	70480569	70480768	16	70484995	70485067	>s488578	0.0486157	0.00325512	16	70479107	0.02768	1	rs17881561	rs62049035	21355	0.994	70457752	FUK
16	70480569	70480768	16	70484995	70485067	>s488578	0.0486157	0.00325512	16	70479107	0.02768	1	rs17881561	rs62049035	21355	0.994	70457752	FUK
11	116914091	116914290	11	116917857	116917857	*	0.0386787	0.00325835	11	116836474	-0.02719	1	rs5076	rs79849088	35436	0.977	116871910	SIK3
18	49589573	49589772	18	49584329	49584416	>s524588	0.0606993	0.00333044	18	49680092	-0.04294	1	rs9962833	rs12607275	2663	0.975	49682755	NR
4	99301987	99302186	4	99305584	99306554	>s130587>s130588>s130589	0.0261753	0.00336514	4	99333363	0.02113	1	rs10028756	rs10028756	0	1	99333363	NR
3	48911194	48911393	3	48907666	48908773	>s90656	0.0179283	0.00340414	3	48958385	-0.008263	1	rs112502530	rs62262466	6174	0.975	48952211	ARIH2
3	48911194	48911393	3	48907666	48908773	>s90656	0.0179283	0.00340414	3	48958385	-0.008263	1	rs112502530	rs149534615	198151	0.993	49156536	NR
12	30157144	30157343	12	30158142	30158145	>s374236	0.0122317	0.00348257	12	30170409	-0.01223	0.116908	rs1973268	rs11613048	30633	0.974	30201042	intergenic
8	141544613	141544812	8	141550507	141550753	>s241769>s241770	-0.0316707	0.00350827	8	141580910	-0.01473	1	rs76358579	rs76358579	0	1	141580910	NR
16	321727	321926	16	321695	321796	>s473623>s473624>s473625>s685001>s685002>s685003>s473626>s473627	-0.04182	0.00353103	16	372516	-0.03527	1	rs62030794	rs3743887	1761	0.991	374277	NR
16	321727	321926	16	321695	321796	>s473623>s473624>s473625>s685001>s685002>s685003>s473626>s473627	-0.04182	0.00353103	16	372516	-0.03527	1	rs62030794	rs3743887	1761	0.991	374277	TMEM8A
7	73424708	73424907	7	73424215	73424215	*	0.0295565	0.00363622	7	73518470	-0.021	1	rs73134970	rs11972595	56355	0.996	73462115	NR
7	73424708	73424907	7	73424215	73424215	*	0.0295565	0.00363622	7	73518470	-0.021	1	rs73134970	rs11972595	56355	0.996	73462115	NR
4	114516639	114516838	4	114520503	114520503	*	0.0118602	0.0037297	4	114598400	-0.01008	1	rs12511581	rs13114989	59531	0.953	114538869	NA
4	114516639	114516838	4	114520503	114520503	*	0.0118602	0.0037297	4	114598400	-0.01008	1	rs12511581	rs79261962	58447	0.953	114539953	NA
4	114516639	114516838	4	114520503	114520503	*	0.0118602	0.0037297	4	114598400	-0.01008	1	rs12511581	rs77422558	57456	0.952	114540944	NA
4	114516639	114516838	4	114520503	114520503	*	0.0118602	0.0037297	4	114598400	-0.01008	1	rs12511581	rs12649041	57180	0.953	114541220	NA
4	114516639	114516838	4	114520503	114520503	*	0.0118602	0.0037297	4	114598400	-0.01008	1	rs12511581	rs13136602	56536	0.953	114541864	NA
4	114516639	114516838	4	114520503	114520503	*	0.0118602	0.0037297	4	114598400	-0.01008	1	rs12511581	rs17047198	54062	0.953	114544338	NA
4	114516639	114516838	4	114520503	114520503	*	0.0118602	0.0037297	4	114598400	-0.01008	1	rs12511581	rs17047201	53455	0.953	114544945	NA
4	114516639	114516838	4	114520503	114520503	*	0.0118602	0.0037297	4	114598400	-0.01008	1	rs12511581	rs13127912	52381	0.953	114546019	NA
4	114516639	114516838	4	114520503	114520503	*	0.0118602	0.0037297	4	114598400	-0.01008	1	rs12511581	rs10516604	52288	0.953	114546112	NA
4	114516639	114516838	4	114520503	114520503	*	0.0118602	0.0037297	4	114598400	-0.01008	1	rs12511581	rs12648803	52172	0.953	114546228	NA
4	114516639	114516838	4	114520503	114520503	*	0.0118602	0.0037297	4	114598400	-0.01008	1	rs12511581	rs10516603	52097	0.953	114546303	NA
4	114516639	114516838	4	114520503	114520503	*	0.0118602	0.0037297	4	114598400	-0.01008	1	rs12511581	rs13135560	51069	0.953	114547331	NA
4	114516639	114516838	4	114520503	114520503	*	0.0118602	0.0037297	4	114598400	-0.01008	1	rs12511581	rs35777558	50289	0.953	114548111	NA
4	114516639	114516838	4	114520503	114520503	*	0.0118602	0.0037297	4	114598400	-0.01008	1	rs12511581	rs34685786	49120	0.953	114549280	NA
4	114516639	114516838	4	114520503	114520503	*	0.0118602	0.0037297	4	114598400	-0.01008	1	rs12511581	rs79776742	48205	0.953	114550195	NA
4	114516639	114516838	4	114520503	114520503	*	0.0118602	0.0037297	4	114598400	-0.01008	1	rs12511581	rs57059575	47163	0.953	114551237	NA
4	114516639	114516838	4	114520503	114520503	*	0.0118602	0.0037297	4	114598400	-0.01008	1	rs12511581	rs13147106	46194	0.953	114552206	NA
4	114516639	114516838	4	114520503	114520503	*	0.0118602	0.0037297	4	114598400	-0.01008	1	rs12511581	rs13147485	46079	0.953	114552321	NA
4	114516639	114516838	4	114520503	114520503	*	0.0118602	0.0037297	4	114598400	-0.01008	1	rs12511581	rs13120552	45882	0.953	114552518	NA
4	114516639	114516838	4	114520503	114520503	*	0.0118602	0.0037297	4	114598400	-0.01008	1	rs12511581	rs13101831	45629	0.953	114552771	NA
4	114516639	114516838	4	114520503	114520503	*	0.0118602	0.0037297	4	114598400	-0.01008	1	rs12511581	rs13147198	44465	0.953	114553935	NA
4	114516639	114516838	4	114520503	114520503	*	0.0118602	0.0037297	4	114598400	-0.01008	1	rs12511581	rs13147645	44257	0.953	114554143	NA
4	114516639	114516838	4	114520503	114520503	*	0.0118602	0.0037297	4	114598400	-0.01008	1	rs12511581	rs35594431	43903	0.953	114554497	NA
4	114516639	114516838	4	114520503	114520503	*	0.0118602	0.0037297	4	114598400	-0.01008	1	rs12511581	rs34403145	43771	0.953	114554629	NA
4	114516639	114516838	4	114520503	114520503	*	0.0118602	0.0037297	4	114598400	-0.01008	1	rs12511581	rs12643074	43174	0.953	114555226	NA
4	114516639	114516838	4	114520503	114520503	*	0.0118602	0.0037297	4	114598400	-0.01008	1	rs12511581	rs2100783	42579	0.953	114555821	NA
4	114516639	114516838	4	114520503	114520503	*	0.0118602	0.0037297	4	114598400	-0.01008	1	rs12511581	rs35252674	41817	0.953	114556583	NA
4	114516639	114516838	4	114520503	114520503	*	0.0118602	0.0037297	4	114598400	-0.01008	1	rs12511581	rs12641516	41428	0.953	114556972	NA
4	114516639	114516838	4	114520503	114520503	*	0.0118602	0.0037297	4	114598400	-0.01008	1	rs12511581	rs71606719	40586	0.953	114557814	NA
4	114516639	114516838	4	114520503	114520503	*	0.0118602	0.0037297	4	114598400	-0.01008	1	rs12511581	rs13125495	40074	0.953	114558326	NA
4	114516639	114516838	4	114520503	114520503	*	0.0118602	0.0037297	4	114598400	-0.01008	1	rs12511581	rs12650115	38168	0.953	114560232	NA
4	114516639	114516838	4	114520503	114520503	*	0.0118602	0.0037297	4	114598400	-0.01008	1	rs12511581	rs12644238	37802	0.953	114560598	NA
4	114516639	114516838	4	114520503	114520503	*	0.0118602	0.0037297	4	114598400	-0.01008	1	rs12511581	rs1903365	36503	0.962	114561897	NA
4	114516639	114516838	4	114520503	114520503	*	0.0118602	0.0037297	4	114598400	-0.01008	1	rs12511581	rs13110751	34828	0.962	114563572	NA
4	114516639	114516838	4	114520503	114520503	*	0.0118602	0.0037297	4	114598400	-0.01008	1	rs12511581	rs13105144	34527	0.962	114563873	NA
4	114516639	114516838	4	114520503	114520503	*	0.0118602	0.0037297	4	114598400	-0.01008	1	rs12511581	rs13129837	34475	0.962	114563925	NA
4	114516639	114516838	4	114520503	114520503	*	0.0118602	0.0037297	4	114598400	-0.01008	1	rs12511581	rs17047236	33825	0.962	114564575	NA
4	114516639	114516838	4	114520503	114520503	*	0.0118602	0.0037297	4	114598400	-0.01008	1	rs12511581	rs33914856	33732	0.962	114564668	NA
4	114516639	114516838	4	114520503	114520503	*	0.0118602	0.0037297	4	114598400	-0.01008	1	rs12511581	rs1380932	32477	0.962	114565923	NA
4	114516639	114516838	4	114520503	114520503	*	0.0118602	0.0037297	4	114598400	-0.01008	1	rs12511581	rs35082726	31623	0.962	114566777	NA
4	114516639	114516838	4	114520503	114520503	*	0.0118602	0.0037297	4	114598400	-0.01008	1	rs12511581	rs17047238	29530	0.962	114568870	NA
4	114516639	114516838	4	114520503	114520503	*	0.0118602	0.0037297	4	114598400	-0.01008	1	rs12511581	rs1460786	29513	0.962	114568887	NA
4	114516639	114516838	4	114520503	114520503	*	0.0118602	0.0037297	4	114598400	-0.01008	1	rs12511581	rs71606720	29099	0.962	114569301	NA
4	114516639	114516838	4	114520503	114520503	*	0.0118602	0.0037297	4	114598400	-0.01008	1	rs12511581	rs17047239	27841	0.962	114570559	NA
4	114516639	114516838	4	114520503	114520503	*	0.0118602	0.0037297	4	114598400	-0.01008	1	rs12511581	rs17047244	26868	0.962	114571532	NA
4	114516639	114516838	4	114520503	114520503	*	0.0118602	0.0037297	4	114598400	-0.01008	1	rs12511581	rs17047246	26524	0.962	114571876	NA
4	114516639	114516838	4	114520503	114520503	*	0.0118602	0.0037297	4	114598400	-0.01008	1	rs12511581	rs13144260	25129	0.962	114573271	NA
4	114516639	114516838	4	114520503	114520503	*	0.0118602	0.0037297	4	114598400	-0.01008	1	rs12511581	rs34948407	23120	0.962	114575280	NA
4	114516639	114516838	4	114520503	114520503	*	0.0118602	0.0037297	4	114598400	-0.01008	1	rs12511581	rs56149980	21820	0.962	114576580	NA
4	114516639	114516838	4	114520503	114520503	*	0.0118602	0.0037297	4	114598400	-0.01008	1	rs12511581	rs12645269	18997	0.962	114579403	NA
4	114516639	114516838	4	114520503	114520503	*	0.0118602	0.0037297	4	114598400	-0.01008	1	rs12511581	rs12642541	18824	0.962	114579576	NA
4	114516639	114516838	4	114520503	114520503	*	0.0118602	0.0037297	4	114598400	-0.01008	1	rs12511581	rs57930571	17967	0.962	114580433	NA
4	114516639	114516838	4	114520503	114520503	*	0.0118602	0.0037297	4	114598400	-0.01008	1	rs12511581	rs35732213	16973	0.962	114581427	NA
4	114516639	114516838	4	114520503	114520503	*	0.0118602	0.0037297	4	114598400	-0.01008	1	rs12511581	rs35936834	16880	0.962	114581520	NA
4	114516639	114516838	4	114520503	114520503	*	0.0118602	0.0037297	4	114598400	-0.01008	1	rs12511581	rs6813229	15679	0.962	114582721	NA
4	114516639	114516838	4	114520503	114520503	*	0.0118602	0.0037297	4	114598400	-0.01008	1	rs12511581	rs6813283	15594	0.962	114582806	NA
4	114516639	114516838	4	114520503	114520503	*	0.0118602	0.0037297	4	114598400	-0.01008	1	rs12511581	rs6839189	15552	0.961	114582848	NA
4	114516639	114516838	4	114520503	114520503	*	0.0118602	0.0037297	4	114598400	-0.01008	1	rs12511581	rs35789595	4345	0.963	114594055	NA
4	114516639	114516838	4	114520503	114520503	*	0.0118602	0.0037297	4	114598400	-0.01008	1	rs12511581	rs35578985	3900	0.962	114594500	NA
4	114516639	114516838	4	114520503	114520503	*	0.0118602	0.0037297	4	114598400	-0.01008	1	rs12511581	rs34001486	3608	0.959	114594792	NA
4	114516639	114516838	4	114520503	114520503	*	0.0118602	0.0037297	4	114598400	-0.01008	1	rs12511581	rs7437576	2933	0.963	114595467	NA
4	114516639	114516838	4	114520503	114520503	*	0.0118602	0.0037297	4	114598400	-0.01008	1	rs12511581	rs7434753	2013	0.963	114596387	UGT8
4	114516639	114516838	4	114520503	114520503	*	0.0118602	0.0037297	4	114598400	-0.01008	1	rs12511581	rs7434753	2013	0.963	114596387	NA
4	114516639	114516838	4	114520503	114520503	*	0.0118602	0.0037297	4	114598400	-0.01008	1	rs12511581	rs6849357	285	0.984	114598115	NA
4	114516639	114516838	4	114520503	114520503	*	0.0118602	0.0037297	4	114598400	-0.01008	1	rs12511581	rs6849357	285	0.984	114598115	NR
4	114516639	114516838	4	114520503	114520503	*	0.0118602	0.0037297	4	114598400	-0.01008	1	rs12511581	rs6849357	285	0.984	114598115	NR
4	114516639	114516838	4	114520503	114520503	*	0.0118602	0.0037297	4	114598400	-0.01008	1	rs12511581	rs6849357	285	0.984	114598115	NA
4	114516639	114516838	4	114520503	114520503	*	0.0118602	0.0037297	4	114598400	-0.01008	1	rs12511581	rs6849357	285	0.984	114598115	NA
4	114516639	114516838	4	114520503	114520503	*	0.0118602	0.0037297	4	114598400	-0.01008	1	rs12511581	rs13112553	206	0.984	114598194	NA
4	114516639	114516838	4	114520503	114520503	*	0.0118602	0.0037297	4	114598400	-0.01008	1	rs12511581	rs12511581	0	1	114598400	NA
2	81536448	81536647	2	81526484	81526789	*	0.0677265	0.00374609	2	81497096	0.06588	0.053994	rs78865221	rs183869217	27120	0.994	81524216	NA
6	84649173	84649372	6	84654202	84654202	*	0.035118	0.00379868	6	84573957	-0.01627	1	rs57865802	rs60255247	422	0.953	84573535	TBX18
6	84649173	84649372	6	84654202	84654202	*	0.035118	0.00379868	6	84573957	-0.01627	1	rs57865802	rs57865802	0	1	84573957	NR
12	132820039	132820238	12	132826144	132826144	*	-0.0285814	0.00384795	12	132782284	-0.02522	0.63397	rs2306546	rs55806229	6315	0.989	132788599	NR
19	17161123	17161322	19	17167072	17167072	*	0.0319066	0.00386491	19	17180212	-0.02292	1	rs187694363	rs115436704	16792	0.966	17197004	MYO9B,USE1,OCEL1,NR2F6
5	180587512	180587711	5	180596822	180596887	>s170264	0.0471965	0.00386629	5	180601743	0.03537	1	rs2279622	rs2279622	0	1	180601743	FLT4
19	17632789	17632988	19	17626156	17626156	*	0.0251949	0.00390243	19	17561370	0.01693	1	rs7259115	rs73525772	797	0.995	17560573	COLGALT1
19	51314226	51314307	19	51310498	51310876	>s550427>s550428>s550429>s550430>s550431>s550432>s550433>s550434>s550435>s550436>s550437	0.0392453	0.00397856	19	51278201	-0.03679	1	rs148108087	rs148108087	0	1	51278201	NA
19	51314226	51314307	19	51310498	51310876	>s550427>s550428>s550429>s550430>s550431>s550432>s550433>s550434>s550435>s550436>s550437	0.0392453	0.00397856	19	51278201	-0.03679	1	rs148108087	rs148108087	0	1	51278201	NA
19	51314226	51314307	19	51310498	51310876	>s550427>s550428>s550429>s550430>s550431>s550432>s550433>s550434>s550435>s550436>s550437	0.0392453	0.00397856	19	51278201	-0.03679	1	rs148108087	rs148108087	0	1	51278201	NR
4	156147262	156147461	4	156152015	156152015	>s819881>s819882>s819883>s819884>s819885>s819886>s819887	-0.0214467	0.00400006	4	156195774	-0.01638	0.981324	rs9307941	rs9307941	0	1	156195774	NA
2	62234974	62235173	2	62229967	62230294	>s56615	0.0260431	0.00401961	2	62212568	-0.0254	1	rs75566660	rs11900673	12958	0.976	62225526	B3GNT2
20	48579955	48580154	20	48583686	48583686	*	0.0514051	0.00403476	20	48617230	-0.03685	1	rs35776712	rs71351936	33478	0.978	48650708	PREX1
11	92167928	92168127	11	92159041	92159048	>s365025	0.0513568	0.00406898	11	92248380	-0.03371	1	rs2212387	rs12786200	2528	1	92245852	MTNR1B
11	92167928	92168127	11	92159041	92159048	>s365025	0.0513568	0.00406898	11	92248380	-0.03371	1	rs2212387	rs7944251	14885	0.979	92263265	FAT3
11	92167928	92168127	11	92159041	92159048	>s365025	0.0513568	0.00406898	11	92248380	-0.03371	1	rs2212387	rs7944251	14885	0.979	92263265	FAT3
10	116572171	116572370	10	116573563	116573563	*	0.0279111	0.00413134	10	116534085	0.02467	1	rs111668169	rs12249434	5109	0.997	116539194	PNLIP,PNLIPRP1
4	55502456	55502655	4	55505793	55505793	>s737756	0.0239552	0.00418592	4	55581977	0.02348	0.263457	rs9790523	rs13142096	15686	0.975	55566291	PDCL2
9	127580009	127580208	9	127577455	127577630	>s315719	0.0226575	0.00420896	9	127672712	-0.01205	1	rs28557014	rs2039203	63938	0.985	127608774	NR
1	155570246	155570445	1	155574870	155575388	>s36528>s36529>s36530	0.0372537	0.0042359	1	155514639	-0.01458	1	rs77350683	rs77350683	0	1	155514639	ASH1L
1	155570246	155570445	1	155574870	155575388	>s36528>s36529>s36530	0.0372537	0.0042359	1	155514639	-0.01458	1	rs77350683	rs77350683	0	1	155514639	ASH1L
1	155570246	155570445	1	155574870	155575388	>s36528>s36529>s36530	0.0372537	0.0042359	1	155514639	-0.01458	1	rs77350683	rs77350683	0	1	155514639	ASH1L
1	155570246	155570445	1	155574870	155575388	>s36528>s36529>s36530	0.0372537	0.0042359	1	155514639	-0.01458	1	rs77350683	rs77350683	0	1	155514639	ASH1L
7	72481931	72482130	7	72482980	72483055	>s210311	0.0614449	0.00426887	7	72408782	0.03536	1	rs73133136	rs73133136	0	1	72408782	Intergenic
20	47587196	47587395	20	47589935	47589935	>s871175>s871176>s871177	-0.0404287	0.00441985	20	47641910	-0.03561	1	rs366442	rs445219	15585	0.976	47657495	NA
17	518108	518307	17	513988	514357	>s494355<s1002522>s494357	0.0312117	0.00443743	17	533068	0.02436	1	rs2304948	rs9915418	14085	0.965	547153	VPS53
17	45998372	45998571	17	45992341	45992606	>s507477	-0.0271075	0.00443863	17	45980229	-0.01712	1	rs3785884	rs62065453	484176	0.958	45496053	intergenic
17	45998372	45998571	17	45992341	45992606	>s507477	-0.0271075	0.00443863	17	45980229	-0.01712	1	rs3785884	rs62065453	484176	0.958	45496053	NR
17	45998372	45998571	17	45992341	45992606	>s507477	-0.0271075	0.00443863	17	45980229	-0.01712	1	rs3785884	rs62065453	484176	0.958	45496053	NR
17	45998372	45998571	17	45992341	45992606	>s507477	-0.0271075	0.00443863	17	45980229	-0.01712	1	rs3785884	rs62065453	484176	0.958	45496053	PLEKHM1
17	45998372	45998571	17	45992341	45992606	>s507477	-0.0271075	0.00443863	17	45980229	-0.01712	1	rs3785884	rs1724411	387664	0.96	45592565	LRRC37A4P,MAPK8IP1P2
17	45998372	45998571	17	45992341	45992606	>s507477	-0.0271075	0.00443863	17	45980229	-0.01712	1	rs3785884	rs28768976	369278	0.971	45610951	intergenic
17	45998372	45998571	17	45992341	45992606	>s507477	-0.0271075	0.00443863	17	45980229	-0.01712	1	rs3785884	rs28768976	369278	0.971	45610951	SPPL2C
17	45998372	45998571	17	45992341	45992606	>s507477	-0.0271075	0.00443863	17	45980229	-0.01712	1	rs3785884	rs28768976	369278	0.971	45610951	SPPL2C
17	45998372	45998571	17	45992341	45992606	>s507477	-0.0271075	0.00443863	17	45980229	-0.01712	1	rs3785884	rs365825	351994	0.971	45628235	CRHR1,LRRC37A3
17	45998372	45998571	17	45992341	45992606	>s507477	-0.0271075	0.00443863	17	45980229	-0.01712	1	rs3785884	rs2942168	342745	0.976	45637484	MAPT
17	45998372	45998571	17	45992341	45992606	>s507477	-0.0271075	0.00443863	17	45980229	-0.01712	1	rs3785884	rs393152	338452	0.97	45641777	MAPT,C17orf69,KIAA1267,LOC644246
17	45998372	45998571	17	45992341	45992606	>s507477	-0.0271075	0.00443863	17	45980229	-0.01712	1	rs3785884	rs393152	338452	0.97	45641777	MAPT
17	45998372	45998571	17	45992341	45992606	>s507477	-0.0271075	0.00443863	17	45980229	-0.01712	1	rs3785884	rs241036	325876	0.972	45654353	NR
17	45998372	45998571	17	45992341	45992606	>s507477	-0.0271075	0.00443863	17	45980229	-0.01712	1	rs3785884	rs241036	325876	0.972	45654353	NA
17	45998372	45998571	17	45992341	45992606	>s507477	-0.0271075	0.00443863	17	45980229	-0.01712	1	rs3785884	rs62055691	302745	0.976	45677484	CRHR1
17	45998372	45998571	17	45992341	45992606	>s507477	-0.0271075	0.00443863	17	45980229	-0.01712	1	rs3785884	rs55974014	300145	0.961	45680084	CRHR1
17	45998372	45998571	17	45992341	45992606	>s507477	-0.0271075	0.00443863	17	45980229	-0.01712	1	rs3785884	rs62055701	298808	0.969	45681421	NR
17	45998372	45998571	17	45992341	45992606	>s507477	-0.0271075	0.00443863	17	45980229	-0.01712	1	rs3785884	rs76761706	280854	0.975	45699375	NR
17	45998372	45998571	17	45992341	45992606	>s507477	-0.0271075	0.00443863	17	45980229	-0.01712	1	rs3785884	rs80143279	280853	0.975	45699376	NR
17	45998372	45998571	17	45992341	45992606	>s507477	-0.0271075	0.00443863	17	45980229	-0.01712	1	rs3785884	rs61667602	272246	0.976	45707983	CRHR1
17	45998372	45998571	17	45992341	45992606	>s507477	-0.0271075	0.00443863	17	45980229	-0.01712	1	rs3785884	rs62056934	267590	0.975	45712639	NA
17	45998372	45998571	17	45992341	45992606	>s507477	-0.0271075	0.00443863	17	45980229	-0.01712	1	rs3785884	rs62056934	267590	0.975	45712639	NA
17	45998372	45998571	17	45992341	45992606	>s507477	-0.0271075	0.00443863	17	45980229	-0.01712	1	rs3785884	rs62056934	267590	0.975	45712639	NA
17	45998372	45998571	17	45992341	45992606	>s507477	-0.0271075	0.00443863	17	45980229	-0.01712	1	rs3785884	rs55938136	259235	0.977	45720994	NR
17	45998372	45998571	17	45992341	45992606	>s507477	-0.0271075	0.00443863	17	45980229	-0.01712	1	rs3785884	rs55938136	259235	0.977	45720994	NR
17	45998372	45998571	17	45992341	45992606	>s507477	-0.0271075	0.00443863	17	45980229	-0.01712	1	rs3785884	rs55938136	259235	0.977	45720994	NR
17	45998372	45998571	17	45992341	45992606	>s507477	-0.0271075	0.00443863	17	45980229	-0.01712	1	rs3785884	rs55938136	259235	0.977	45720994	NR
17	45998372	45998571	17	45992341	45992606	>s507477	-0.0271075	0.00443863	17	45980229	-0.01712	1	rs3785884	rs55938136	259235	0.977	45720994	NR
17	45998372	45998571	17	45992341	45992606	>s507477	-0.0271075	0.00443863	17	45980229	-0.01712	1	rs3785884	rs55938136	259235	0.977	45720994	NR
17	45998372	45998571	17	45992341	45992606	>s507477	-0.0271075	0.00443863	17	45980229	-0.01712	1	rs3785884	rs55938136	259235	0.977	45720994	NR
17	45998372	45998571	17	45992341	45992606	>s507477	-0.0271075	0.00443863	17	45980229	-0.01712	1	rs3785884	rs55938136	259235	0.977	45720994	NR
17	45998372	45998571	17	45992341	45992606	>s507477	-0.0271075	0.00443863	17	45980229	-0.01712	1	rs3785884	rs55938136	259235	0.977	45720994	NR
17	45998372	45998571	17	45992341	45992606	>s507477	-0.0271075	0.00443863	17	45980229	-0.01712	1	rs3785884	rs55938136	259235	0.977	45720994	NR
17	45998372	45998571	17	45992341	45992606	>s507477	-0.0271075	0.00443863	17	45980229	-0.01712	1	rs3785884	rs55938136	259235	0.977	45720994	NR
17	45998372	45998571	17	45992341	45992606	>s507477	-0.0271075	0.00443863	17	45980229	-0.01712	1	rs3785884	rs55938136	259235	0.977	45720994	NR
17	45998372	45998571	17	45992341	45992606	>s507477	-0.0271075	0.00443863	17	45980229	-0.01712	1	rs3785884	rs55938136	259235	0.977	45720994	NR
17	45998372	45998571	17	45992341	45992606	>s507477	-0.0271075	0.00443863	17	45980229	-0.01712	1	rs3785884	rs55938136	259235	0.977	45720994	NR
17	45998372	45998571	17	45992341	45992606	>s507477	-0.0271075	0.00443863	17	45980229	-0.01712	1	rs3785884	rs55938136	259235	0.977	45720994	NR
17	45998372	45998571	17	45992341	45992606	>s507477	-0.0271075	0.00443863	17	45980229	-0.01712	1	rs3785884	rs55938136	259235	0.977	45720994	NR
17	45998372	45998571	17	45992341	45992606	>s507477	-0.0271075	0.00443863	17	45980229	-0.01712	1	rs3785884	rs55938136	259235	0.977	45720994	CRHR1
17	45998372	45998571	17	45992341	45992606	>s507477	-0.0271075	0.00443863	17	45980229	-0.01712	1	rs3785884	rs55938136	259235	0.977	45720994	NA
17	45998372	45998571	17	45992341	45992606	>s507477	-0.0271075	0.00443863	17	45980229	-0.01712	1	rs3785884	rs55938136	259235	0.977	45720994	NA
17	45998372	45998571	17	45992341	45992606	>s507477	-0.0271075	0.00443863	17	45980229	-0.01712	1	rs3785884	rs55938136	259235	0.977	45720994	NA
17	45998372	45998571	17	45992341	45992606	>s507477	-0.0271075	0.00443863	17	45980229	-0.01712	1	rs3785884	rs75022332	246722	0.97	45733507	ACBD4
17	45998372	45998571	17	45992341	45992606	>s507477	-0.0271075	0.00443863	17	45980229	-0.01712	1	rs3785884	rs77804065	246699	0.95	45733530	ARHGAP27,CRHR1,KANSL1,MAPT,PLEKHM1,SPPL2C,STH
17	45998372	45998571	17	45992341	45992606	>s507477	-0.0271075	0.00443863	17	45980229	-0.01712	1	rs3785884	rs77804065	246699	0.95	45733530	LINC02210,CRHR1,MAPT
17	45998372	45998571	17	45992341	45992606	>s507477	-0.0271075	0.00443863	17	45980229	-0.01712	1	rs3785884	rs77804065	246699	0.95	45733530	ACBD4
17	45998372	45998571	17	45992341	45992606	>s507477	-0.0271075	0.00443863	17	45980229	-0.01712	1	rs3785884	rs77804065	246699	0.95	45733530	NR
17	45998372	45998571	17	45992341	45992606	>s507477	-0.0271075	0.00443863	17	45980229	-0.01712	1	rs3785884	rs77804065	246699	0.95	45733530	CRHR1
17	45998372	45998571	17	45992341	45992606	>s507477	-0.0271075	0.00443863	17	45980229	-0.01712	1	rs3785884	rs17563683	246523	0.976	45733706	CRHR1,RP11-105N13.4,RP11-293E1.1
17	45998372	45998571	17	45992341	45992606	>s507477	-0.0271075	0.00443863	17	45980229	-0.01712	1	rs3785884	rs17563683	246523	0.976	45733706	CRHR1,RP11-105N13.4,RP11-293E1.1
17	45998372	45998571	17	45992341	45992606	>s507477	-0.0271075	0.00443863	17	45980229	-0.01712	1	rs3785884	rs17563683	246523	0.976	45733706	MGC57346-CRHR1,SPPL2C
17	45998372	45998571	17	45992341	45992606	>s507477	-0.0271075	0.00443863	17	45980229	-0.01712	1	rs3785884	rs12150672	230958	0.976	45749271	NR
17	45998372	45998571	17	45992341	45992606	>s507477	-0.0271075	0.00443863	17	45980229	-0.01712	1	rs3785884	rs17426174	226657	0.976	45753572	RP11-105N13.4
17	45998372	45998571	17	45992341	45992606	>s507477	-0.0271075	0.00443863	17	45980229	-0.01712	1	rs3785884	rs62055888	218875	0.964	45761354	NA
17	45998372	45998571	17	45992341	45992606	>s507477	-0.0271075	0.00443863	17	45980229	-0.01712	1	rs3785884	rs11079718	217644	0.974	45762585	RP11-105N13.4,CRHR1
17	45998372	45998571	17	45992341	45992606	>s507477	-0.0271075	0.00443863	17	45980229	-0.01712	1	rs3785884	rs55657917	213035	0.969	45767194	HOXB2
17	45998372	45998571	17	45992341	45992606	>s507477	-0.0271075	0.00443863	17	45980229	-0.01712	1	rs3785884	rs55657917	213035	0.969	45767194	HOXB2
17	45998372	45998571	17	45992341	45992606	>s507477	-0.0271075	0.00443863	17	45980229	-0.01712	1	rs3785884	rs55657917	213035	0.969	45767194	CRHR1
17	45998372	45998571	17	45992341	45992606	>s507477	-0.0271075	0.00443863	17	45980229	-0.01712	1	rs3785884	rs55657917	213035	0.969	45767194	LINC02210-CRHR1
17	45998372	45998571	17	45992341	45992606	>s507477	-0.0271075	0.00443863	17	45980229	-0.01712	1	rs3785884	rs62055935	208845	0.973	45771384	NR
17	45998372	45998571	17	45992341	45992606	>s507477	-0.0271075	0.00443863	17	45980229	-0.01712	1	rs3785884	rs79730878	208180	0.957	45772049	CRHR1-IT1-CRHR1
17	45998372	45998571	17	45992341	45992606	>s507477	-0.0271075	0.00443863	17	45980229	-0.01712	1	rs3785884	rs56303031	203673	0.977	45776556	NA
17	45998372	45998571	17	45992341	45992606	>s507477	-0.0271075	0.00443863	17	45980229	-0.01712	1	rs3785884	rs62057061	200956	0.969	45779273	NR
17	45998372	45998571	17	45992341	45992606	>s507477	-0.0271075	0.00443863	17	45980229	-0.01712	1	rs3785884	rs62057070	197955	0.978	45782274	NR
17	45998372	45998571	17	45992341	45992606	>s507477	-0.0271075	0.00443863	17	45980229	-0.01712	1	rs3785884	rs56319902	185613	0.971	45794616	NA
17	45998372	45998571	17	45992341	45992606	>s507477	-0.0271075	0.00443863	17	45980229	-0.01712	1	rs3785884	rs56319902	185613	0.971	45794616	NA
17	45998372	45998571	17	45992341	45992606	>s507477	-0.0271075	0.00443863	17	45980229	-0.01712	1	rs3785884	rs56319902	185613	0.971	45794616	NA
17	45998372	45998571	17	45992341	45992606	>s507477	-0.0271075	0.00443863	17	45980229	-0.01712	1	rs3785884	rs56319902	185613	0.971	45794616	NA
17	45998372	45998571	17	45992341	45992606	>s507477	-0.0271075	0.00443863	17	45980229	-0.01712	1	rs3785884	rs8072451	163879	0.976	45816350	MAPT,GRN,CRHR1,STH
17	45998372	45998571	17	45992341	45992606	>s507477	-0.0271075	0.00443863	17	45980229	-0.01712	1	rs3785884	rs62057107	161563	0.976	45818666	Intergenic
17	45998372	45998571	17	45992341	45992606	>s507477	-0.0271075	0.00443863	17	45980229	-0.01712	1	rs3785884	rs62057107	161563	0.976	45818666	Intergenic
17	45998372	45998571	17	45992341	45992606	>s507477	-0.0271075	0.00443863	17	45980229	-0.01712	1	rs3785884	rs79600142	159873	0.977	45820356	NR
17	45998372	45998571	17	45992341	45992606	>s507477	-0.0271075	0.00443863	17	45980229	-0.01712	1	rs3785884	rs17689882	150767	0.974	45829462	CRHR1
17	45998372	45998571	17	45992341	45992606	>s507477	-0.0271075	0.00443863	17	45980229	-0.01712	1	rs3785884	rs16940672	149443	0.974	45830786	CRHR1
17	45998372	45998571	17	45992341	45992606	>s507477	-0.0271075	0.00443863	17	45980229	-0.01712	1	rs3785884	rs1876829	146152	0.976	45834077	NR
17	45998372	45998571	17	45992341	45992606	>s507477	-0.0271075	0.00443863	17	45980229	-0.01712	1	rs3785884	rs1876829	146152	0.976	45834077	NR
17	45998372	45998571	17	45992341	45992606	>s507477	-0.0271075	0.00443863	17	45980229	-0.01712	1	rs3785884	rs2106785	138490	0.972	45841739	ACBD4
17	45998372	45998571	17	45992341	45992606	>s507477	-0.0271075	0.00443863	17	45980229	-0.01712	1	rs3785884	rs12185233	133941	0.967	45846288	NR
17	45998372	45998571	17	45992341	45992606	>s507477	-0.0271075	0.00443863	17	45980229	-0.01712	1	rs3785884	rs12185268	133912	0.976	45846317	MAPT
17	45998372	45998571	17	45992341	45992606	>s507477	-0.0271075	0.00443863	17	45980229	-0.01712	1	rs3785884	rs12185268	133912	0.976	45846317	MAPT
17	45998372	45998571	17	45992341	45992606	>s507477	-0.0271075	0.00443863	17	45980229	-0.01712	1	rs3785884	rs12373123	133522	0.976	45846707	SPPL2C
17	45998372	45998571	17	45992341	45992606	>s507477	-0.0271075	0.00443863	17	45980229	-0.01712	1	rs3785884	rs12373123	133522	0.976	45846707	NA
17	45998372	45998571	17	45992341	45992606	>s507477	-0.0271075	0.00443863	17	45980229	-0.01712	1	rs3785884	rs12373142	133395	0.973	45846834	SPPL2C
17	45998372	45998571	17	45992341	45992606	>s507477	-0.0271075	0.00443863	17	45980229	-0.01712	1	rs3785884	rs12373142	133395	0.973	45846834	SPPL2C
17	45998372	45998571	17	45992341	45992606	>s507477	-0.0271075	0.00443863	17	45980229	-0.01712	1	rs3785884	rs12373124	133376	0.973	45846853	intergenic
17	45998372	45998571	17	45992341	45992606	>s507477	-0.0271075	0.00443863	17	45980229	-0.01712	1	rs3785884	rs12373124	133376	0.973	45846853	NR
17	45998372	45998571	17	45992341	45992606	>s507477	-0.0271075	0.00443863	17	45980229	-0.01712	1	rs3785884	rs17769552	130305	0.961	45849924	SPPL2C
17	45998372	45998571	17	45992341	45992606	>s507477	-0.0271075	0.00443863	17	45980229	-0.01712	1	rs3785884	rs79412431	117574	0.971	45862655	MAPT-AS1
17	45998372	45998571	17	45992341	45992606	>s507477	-0.0271075	0.00443863	17	45980229	-0.01712	1	rs3785884	rs79412431	117574	0.971	45862655	MAPT-AS1
17	45998372	45998571	17	45992341	45992606	>s507477	-0.0271075	0.00443863	17	45980229	-0.01712	1	rs3785884	rs79412431	117574	0.971	45862655	MAPT-AS1
17	45998372	45998571	17	45992341	45992606	>s507477	-0.0271075	0.00443863	17	45980229	-0.01712	1	rs3785884	rs10491140	106619	0.979	45873610	NA
17	45998372	45998571	17	45992341	45992606	>s507477	-0.0271075	0.00443863	17	45980229	-0.01712	1	rs3785884	rs2214258	103876	0.977	45876353	intergenic
17	45998372	45998571	17	45992341	45992606	>s507477	-0.0271075	0.00443863	17	45980229	-0.01712	1	rs3785884	rs62055544	93056	0.966	45887173	NR
17	45998372	45998571	17	45992341	45992606	>s507477	-0.0271075	0.00443863	17	45980229	-0.01712	1	rs3785884	rs62055546	93028	0.974	45887201	MAPT
17	45998372	45998571	17	45992341	45992606	>s507477	-0.0271075	0.00443863	17	45980229	-0.01712	1	rs3785884	rs76324150	84362	0.979	45895867	ARHGAP27,MAPT,STH,NSF,WNT3
17	45998372	45998571	17	45992341	45992606	>s507477	-0.0271075	0.00443863	17	45980229	-0.01712	1	rs3785884	rs62056789	82180	0.979	45898049	MAPT
17	45998372	45998571	17	45992341	45992606	>s507477	-0.0271075	0.00443863	17	45980229	-0.01712	1	rs3785884	rs62056789	82180	0.979	45898049	MAPT
17	45998372	45998571	17	45992341	45992606	>s507477	-0.0271075	0.00443863	17	45980229	-0.01712	1	rs3785884	rs1864325	79768	0.979	45900461	MAPT
17	45998372	45998571	17	45992341	45992606	>s507477	-0.0271075	0.00443863	17	45980229	-0.01712	1	rs3785884	rs17563986	66323	0.979	45913906	MAPT
17	45998372	45998571	17	45992341	45992606	>s507477	-0.0271075	0.00443863	17	45980229	-0.01712	1	rs3785884	rs17563986	66323	0.979	45913906	MAPT
17	45998372	45998571	17	45992341	45992606	>s507477	-0.0271075	0.00443863	17	45980229	-0.01712	1	rs3785884	rs17649553	62947	0.978	45917282	MAPT
17	45998372	45998571	17	45992341	45992606	>s507477	-0.0271075	0.00443863	17	45980229	-0.01712	1	rs3785884	rs17649553	62947	0.978	45917282	ARHGAP27,CRHR1,KANSL1,SPPL2C,MAPT,STH
17	45998372	45998571	17	45992341	45992606	>s507477	-0.0271075	0.00443863	17	45980229	-0.01712	1	rs3785884	rs17564829	50994	0.979	45929235	CRHR1,MAPT
17	45998372	45998571	17	45992341	45992606	>s507477	-0.0271075	0.00443863	17	45980229	-0.01712	1	rs3785884	rs79857651	44120	0.978	45936109	NR
17	45998372	45998571	17	45992341	45992606	>s507477	-0.0271075	0.00443863	17	45980229	-0.01712	1	rs3785884	rs12150229	42149	0.977	45938080	NR
17	45998372	45998571	17	45992341	45992606	>s507477	-0.0271075	0.00443863	17	45980229	-0.01712	1	rs3785884	rs62061733	39196	0.97	45941033	NR
17	45998372	45998571	17	45992341	45992606	>s507477	-0.0271075	0.00443863	17	45980229	-0.01712	1	rs3785884	rs62061733	39196	0.97	45941033	NA
17	45998372	45998571	17	45992341	45992606	>s507477	-0.0271075	0.00443863	17	45980229	-0.01712	1	rs3785884	rs62061734	39107	0.972	45941122	NR
17	45998372	45998571	17	45992341	45992606	>s507477	-0.0271075	0.00443863	17	45980229	-0.01712	1	rs3785884	rs62061734	39107	0.972	45941122	NA
17	45998372	45998571	17	45992341	45992606	>s507477	-0.0271075	0.00443863	17	45980229	-0.01712	1	rs3785884	rs242559	31707	0.953	45948522	MAPT
17	45998372	45998571	17	45992341	45992606	>s507477	-0.0271075	0.00443863	17	45980229	-0.01712	1	rs3785884	rs242559	31707	0.953	45948522	MAPT
17	45998372	45998571	17	45992341	45992606	>s507477	-0.0271075	0.00443863	17	45980229	-0.01712	1	rs3785884	rs242559	31707	0.953	45948522	MAPT
17	45998372	45998571	17	45992341	45992606	>s507477	-0.0271075	0.00443863	17	45980229	-0.01712	1	rs3785884	rs62062797	30229	0.975	45950000	NR
17	45998372	45998571	17	45992341	45992606	>s507477	-0.0271075	0.00443863	17	45980229	-0.01712	1	rs3785884	rs17650842	20104	0.978	45960125	NR
17	45998372	45998571	17	45992341	45992606	>s507477	-0.0271075	0.00443863	17	45980229	-0.01712	1	rs3785884	rs56280951	16488	0.976	45963741	ACBD4
17	45998372	45998571	17	45992341	45992606	>s507477	-0.0271075	0.00443863	17	45980229	-0.01712	1	rs3785884	rs117124984	6007	0.967	45974222	NR
17	45998372	45998571	17	45992341	45992606	>s507477	-0.0271075	0.00443863	17	45980229	-0.01712	1	rs3785884	rs118087478	6006	0.967	45974223	NR
17	45998372	45998571	17	45992341	45992606	>s507477	-0.0271075	0.00443863	17	45980229	-0.01712	1	rs3785884	rs1981997	828	0.981	45979401	MAPT
17	45998372	45998571	17	45992341	45992606	>s507477	-0.0271075	0.00443863	17	45980229	-0.01712	1	rs3785884	rs3785884	0	1	45980229	NR
17	45998372	45998571	17	45992341	45992606	>s507477	-0.0271075	0.00443863	17	45980229	-0.01712	1	rs3785884	rs3785884	0	1	45980229	NR
17	45998372	45998571	17	45992341	45992606	>s507477	-0.0271075	0.00443863	17	45980229	-0.01712	1	rs3785884	rs62063786	3428	0.977	45983657	MAPT
17	45998372	45998571	17	45992341	45992606	>s507477	-0.0271075	0.00443863	17	45980229	-0.01712	1	rs3785884	rs919462	8145	0.981	45988374	WNT3,MAPT,PLEKHM1
17	45998372	45998571	17	45992341	45992606	>s507477	-0.0271075	0.00443863	17	45980229	-0.01712	1	rs3785884	rs112385572	8577	0.981	45988806	CRHR1,KANSL1,MAPT,PLEKHM1,SPPL2C,STH
17	45998372	45998571	17	45992341	45992606	>s507477	-0.0271075	0.00443863	17	45980229	-0.01712	1	rs3785884	rs1991556	25807	0.966	46006036	STH
17	45998372	45998571	17	45992341	45992606	>s507477	-0.0271075	0.00443863	17	45980229	-0.01712	1	rs3785884	rs1991556	25807	0.966	46006036	NA
17	45998372	45998571	17	45992341	45992606	>s507477	-0.0271075	0.00443863	17	45980229	-0.01712	1	rs3785884	rs1991556	25807	0.966	46006036	MAPT,STH
17	45998372	45998571	17	45992341	45992606	>s507477	-0.0271075	0.00443863	17	45980229	-0.01712	1	rs3785884	rs58879558	37872	0.991	46018101	NA
17	45998372	45998571	17	45992341	45992606	>s507477	-0.0271075	0.00443863	17	45980229	-0.01712	1	rs3785884	rs58879558	37872	0.991	46018101	NR
17	45998372	45998571	17	45992341	45992606	>s507477	-0.0271075	0.00443863	17	45980229	-0.01712	1	rs3785884	rs58879558	37872	0.991	46018101	NR
17	45998372	45998571	17	45992341	45992606	>s507477	-0.0271075	0.00443863	17	45980229	-0.01712	1	rs3785884	rs58879558	37872	0.991	46018101	NR
17	45998372	45998571	17	45992341	45992606	>s507477	-0.0271075	0.00443863	17	45980229	-0.01712	1	rs3785884	rs58879558	37872	0.991	46018101	NR
17	45998372	45998571	17	45992341	45992606	>s507477	-0.0271075	0.00443863	17	45980229	-0.01712	1	rs3785884	rs58879558	37872	0.991	46018101	NR
17	45998372	45998571	17	45992341	45992606	>s507477	-0.0271075	0.00443863	17	45980229	-0.01712	1	rs3785884	rs58879558	37872	0.991	46018101	MAPT
17	45998372	45998571	17	45992341	45992606	>s507477	-0.0271075	0.00443863	17	45980229	-0.01712	1	rs3785884	rs58879558	37872	0.991	46018101	MAPT
17	45998372	45998571	17	45992341	45992606	>s507477	-0.0271075	0.00443863	17	45980229	-0.01712	1	rs3785884	rs62062288	38958	0.952	46019187	NR
17	45998372	45998571	17	45992341	45992606	>s507477	-0.0271075	0.00443863	17	45980229	-0.01712	1	rs3785884	rs62062288	38958	0.952	46019187	NR
17	45998372	45998571	17	45992341	45992606	>s507477	-0.0271075	0.00443863	17	45980229	-0.01712	1	rs3785884	rs62062288	38958	0.952	46019187	STH
17	45998372	45998571	17	45992341	45992606	>s507477	-0.0271075	0.00443863	17	45980229	-0.01712	1	rs3785884	rs62062288	38958	0.952	46019187	NR
17	45998372	45998571	17	45992341	45992606	>s507477	-0.0271075	0.00443863	17	45980229	-0.01712	1	rs3785884	rs62062288	38958	0.952	46019187	MAPT
17	45998372	45998571	17	45992341	45992606	>s507477	-0.0271075	0.00443863	17	45980229	-0.01712	1	rs3785884	rs62062288	38958	0.952	46019187	CRHR1,DND1P1,ENSG00000262372,ENSG00000262500,ENSG00000262881,KANSL1,MAPT,MAPT-AS1,NSF,PLEKHM1,SPPL2C,STH,RP11-105N13.4,WNT3
17	45998372	45998571	17	45992341	45992606	>s507477	-0.0271075	0.00443863	17	45980229	-0.01712	1	rs3785884	rs62062288	38958	0.952	46019187	KANSL1
17	45998372	45998571	17	45992341	45992606	>s507477	-0.0271075	0.00443863	17	45980229	-0.01712	1	rs3785884	rs62062288	38958	0.952	46019187	KANSL1
17	45998372	45998571	17	45992341	45992606	>s507477	-0.0271075	0.00443863	17	45980229	-0.01712	1	rs3785884	rs62062288	38958	0.952	46019187	NR
17	45998372	45998571	17	45992341	45992606	>s507477	-0.0271075	0.00443863	17	45980229	-0.01712	1	rs3785884	rs62062288	38958	0.952	46019187	MAPT
17	45998372	45998571	17	45992341	45992606	>s507477	-0.0271075	0.00443863	17	45980229	-0.01712	1	rs3785884	rs17652520	41372	0.965	46021601	intergenic
17	45998372	45998571	17	45992341	45992606	>s507477	-0.0271075	0.00443863	17	45980229	-0.01712	1	rs3785884	rs17652520	41372	0.965	46021601	NA
17	45998372	45998571	17	45992341	45992606	>s507477	-0.0271075	0.00443863	17	45980229	-0.01712	1	rs3785884	rs17652520	41372	0.965	46021601	MAPT
17	45998372	45998571	17	45992341	45992606	>s507477	-0.0271075	0.00443863	17	45980229	-0.01712	1	rs3785884	rs17652520	41372	0.965	46021601	MAPT
17	45998372	45998571	17	45992341	45992606	>s507477	-0.0271075	0.00443863	17	45980229	-0.01712	1	rs3785884	rs112333322	69078	0.978	46049307	NR
17	45998372	45998571	17	45992341	45992606	>s507477	-0.0271075	0.00443863	17	45980229	-0.01712	1	rs3785884	rs974295	92557	0.981	46072786	KANSL1
17	45998372	45998571	17	45992341	45992606	>s507477	-0.0271075	0.00443863	17	45980229	-0.01712	1	rs3785884	rs8080583	105002	0.967	46085231	KANSL1
17	45998372	45998571	17	45992341	45992606	>s507477	-0.0271075	0.00443863	17	45980229	-0.01712	1	rs3785884	rs55692232	106728	0.981	46086957	NR
17	45998372	45998571	17	45992341	45992606	>s507477	-0.0271075	0.00443863	17	45980229	-0.01712	1	rs3785884	rs111676341	125808	0.98	46106037	NR
17	45998372	45998571	17	45992341	45992606	>s507477	-0.0271075	0.00443863	17	45980229	-0.01712	1	rs3785884	rs16940904	128468	0.965	46108697	NA
17	45998372	45998571	17	45992341	45992606	>s507477	-0.0271075	0.00443863	17	45980229	-0.01712	1	rs3785884	rs16940904	128468	0.965	46108697	NA
17	45998372	45998571	17	45992341	45992606	>s507477	-0.0271075	0.00443863	17	45980229	-0.01712	1	rs3785884	rs16940904	128468	0.965	46108697	NA
17	45998372	45998571	17	45992341	45992606	>s507477	-0.0271075	0.00443863	17	45980229	-0.01712	1	rs3785884	rs16940904	128468	0.965	46108697	NA
17	45998372	45998571	17	45992341	45992606	>s507477	-0.0271075	0.00443863	17	45980229	-0.01712	1	rs3785884	rs9303525	129662	0.967	46109891	MAPT,GRN,CRHR1,STH
17	45998372	45998571	17	45992341	45992606	>s507477	-0.0271075	0.00443863	17	45980229	-0.01712	1	rs3785884	rs17577094	129897	0.98	46110126	MAPT
17	45998372	45998571	17	45992341	45992606	>s507477	-0.0271075	0.00443863	17	45980229	-0.01712	1	rs3785884	rs76640332	132263	0.978	46112492	KANSL1
17	45998372	45998571	17	45992341	45992606	>s507477	-0.0271075	0.00443863	17	45980229	-0.01712	1	rs3785884	rs78929339	132315	0.979	46112544	NA
17	45998372	45998571	17	45992341	45992606	>s507477	-0.0271075	0.00443863	17	45980229	-0.01712	1	rs3785884	rs4606752	135023	0.98	46115252	KANSL1
17	45998372	45998571	17	45992341	45992606	>s507477	-0.0271075	0.00443863	17	45980229	-0.01712	1	rs3785884	rs4606752	135023	0.98	46115252	KANSL1
17	45998372	45998571	17	45992341	45992606	>s507477	-0.0271075	0.00443863	17	45980229	-0.01712	1	rs3785884	rs17577369	135328	0.976	46115557	NR
17	45998372	45998571	17	45992341	45992606	>s507477	-0.0271075	0.00443863	17	45980229	-0.01712	1	rs3785884	rs17661015	135362	0.976	46115591	NR
17	45998372	45998571	17	45992341	45992606	>s507477	-0.0271075	0.00443863	17	45980229	-0.01712	1	rs3785884	rs17661015	135362	0.976	46115591	NR
17	45998372	45998571	17	45992341	45992606	>s507477	-0.0271075	0.00443863	17	45980229	-0.01712	1	rs3785884	rs4471723	148095	0.969	46128324	NR
17	45998372	45998571	17	45992341	45992606	>s507477	-0.0271075	0.00443863	17	45980229	-0.01712	1	rs3785884	rs79301522	150337	0.98	46130566	NR
17	45998372	45998571	17	45992341	45992606	>s507477	-0.0271075	0.00443863	17	45980229	-0.01712	1	rs3785884	rs1881193	191174	0.98	46171403	NR
17	45998372	45998571	17	45992341	45992606	>s507477	-0.0271075	0.00443863	17	45980229	-0.01712	1	rs3785884	rs2732596	211951	0.972	46192180	KANSL1
17	45998372	45998571	17	45992341	45992606	>s507477	-0.0271075	0.00443863	17	45980229	-0.01712	1	rs3785884	rs2696457	226462	0.972	46206691	NR
17	45998372	45998571	17	45992341	45992606	>s507477	-0.0271075	0.00443863	17	45980229	-0.01712	1	rs3785884	rs2469933	227936	0.972	46208165	KIAA1267
17	45998372	45998571	17	45992341	45992606	>s507477	-0.0271075	0.00443863	17	45980229	-0.01712	1	rs3785884	rs2532386	256162	0.972	46236391	KANSL1,LRRC37A
17	45998372	45998571	17	45992341	45992606	>s507477	-0.0271075	0.00443863	17	45980229	-0.01712	1	rs3785884	rs2696668	260589	0.97	46240818	NR
17	45998372	45998571	17	45992341	45992606	>s507477	-0.0271075	0.00443863	17	45980229	-0.01712	1	rs3785884	rs2732650	287393	0.971	46267622	RP11-259G18.1
17	45998372	45998571	17	45992341	45992606	>s507477	-0.0271075	0.00443863	17	45980229	-0.01712	1	rs3785884	rs2696557	289623	0.968	46269852	NR
17	45998372	45998571	17	45992341	45992606	>s507477	-0.0271075	0.00443863	17	45980229	-0.01712	1	rs3785884	rs2732708	293792	0.968	46274021	intergenic
17	45998372	45998571	17	45992341	45992606	>s507477	-0.0271075	0.00443863	17	45980229	-0.01712	1	rs3785884	rs2732708	293792	0.968	46274021	NR
17	45998372	45998571	17	45992341	45992606	>s507477	-0.0271075	0.00443863	17	45980229	-0.01712	1	rs3785884	rs2732706	294091	0.967	46274320	NA
17	45998372	45998571	17	45992341	45992606	>s507477	-0.0271075	0.00443863	17	45980229	-0.01712	1	rs3785884	rs2261201	296954	0.966	46277183	NR
17	45998372	45998571	17	45992341	45992606	>s507477	-0.0271075	0.00443863	17	45980229	-0.01712	1	rs3785884	rs2696532	298007	0.962	46278236	NR
17	45998372	45998571	17	45992341	45992606	>s507477	-0.0271075	0.00443863	17	45980229	-0.01712	1	rs3785884	rs2696524	299198	0.965	46279427	NR
17	45998372	45998571	17	45992341	45992606	>s507477	-0.0271075	0.00443863	17	45980229	-0.01712	1	rs3785884	rs17665188	299756	0.965	46279985	NR
17	45998372	45998571	17	45992341	45992606	>s507477	-0.0271075	0.00443863	17	45980229	-0.01712	1	rs3785884	rs2696500	306334	0.965	46286563	NR
17	45998372	45998571	17	45992341	45992606	>s507477	-0.0271075	0.00443863	17	45980229	-0.01712	1	rs3785884	rs2696497	307054	0.965	46287283	NR
6	170382311	170382510	6	170377063	170377256	<s929645>s193085>s780715>s962068>s780716>s193087	-0.0382759	0.00443945	6	170303421	-0.03006	0.168391	rs4310036	rs6456198	10413	0.993	170313834	NA
8	143557444	143557643	8	143557434	143557435	>s243047<s1107856>s243048>s243049>s243050>s243051>s243052	0.0380477	0.00447754	8	143550421	0.03686	0.168304	rs35846341	rs921667	22558	0.99	143527863	NR
7	21787550	21787749	7	21789769	21789808	>s198497>s198498	0.0310874	0.0045091	7	21854755	-0.02063	1	rs62445864	rs62445864	0	1	21854755	NR
8	143507504	143507703	8	143498707	143498791	>s243038>s243039	0.0301548	0.00461825	8	143563343	-0.02029	1	rs13266821	rs13266821	0	1	143563343	NR
14	100172152	100172351	14	100177412	100177540	>s443338	0.0392707	0.00468314	14	100235643	-0.02348	1	rs141516158	rs141516158	0	1	100235643	NA
1	23898770	23898969	1	23902167	23902167	*	0.0434782	0.00470125	1	23909442	-0.02799	1	rs61778219	rs61778217	6519	0.995	23902923	NR
1	23898770	23898969	1	23902167	23902167	*	0.0434782	0.00470125	1	23909442	-0.02799	1	rs61778219	rs61778219	0	1	23909442	CNR2
18	76418872	76419071	18	76424963	76424963	*	0.0371283	0.0047241	18	76358607	-0.02253	1	rs1047922	rs1047922	0	1	76358607	ZNF516
18	76418872	76419071	18	76424963	76424963	*	0.0371283	0.0047241	18	76358607	-0.02253	1	rs1047922	rs1047922	0	1	76358607	ZNF516
18	76418872	76419071	18	76424963	76424963	*	0.0371283	0.0047241	18	76358607	-0.02253	1	rs1047922	rs1047922	0	1	76358607	ZNF516
18	76418872	76419071	18	76424963	76424963	*	0.0371283	0.0047241	18	76358607	-0.02253	1	rs1047922	rs1047922	0	1	76358607	NA
18	76418872	76419071	18	76424963	76424963	*	0.0371283	0.0047241	18	76358607	-0.02253	1	rs1047922	rs41506447	4677	0.973	76363284	ZNF516
2	9998585	9998607	2	9998813	9998889	>s51267>s51268>s51269>s51270>s51271>s51272>s694257>s51274>s51275	0.0833153	0.00472653	2	9951823	0.07355	0.281808	rs111645870	rs73913932	2574	0.972	9954397	GRHL1
2	9998585	9998607	2	9998813	9998889	>s51267>s51268>s51269>s51270>s51271>s51272>s694257>s51274>s51275	0.0833153	0.00472653	2	9951823	0.07355	0.281808	rs111645870	rs73913932	2574	0.972	9954397	NR
16	74699855	74700054	16	74691418	74691552	>s489068	0.0583743	0.00479709	16	74743896	0.03757	1	rs34988360	rs2240255	4996	0.99	74738900	FA2H
21	45430364	45430563	21	45431567	45431567	>s687242	-0.0366193	0.00489964	21	45511195	0.03591	1	rs12483377	rs12483377	0	1	45511195	COL18A1
21	45430364	45430563	21	45431567	45431567	>s687242	-0.0366193	0.00489964	21	45511195	0.03591	1	rs12483377	rs12483377	0	1	45511195	NA
21	45430364	45430563	21	45431567	45431567	>s687242	-0.0366193	0.00489964	21	45511195	0.03591	1	rs12483377	rs12483377	0	1	45511195	NA
21	45430364	45430563	21	45431567	45431567	>s687242	-0.0366193	0.00489964	21	45511195	0.03591	1	rs12483377	rs12483377	0	1	45511195	NR
10	116571571	116571770	10	116574081	116574160	>s344039	0.0452067	0.0049408	10	116532643	-0.04189	1	rs78740289	rs78740289	0	1	116532643	PNLIPA
5	42160961	42161052	5	42158172	42158228	<s800554	-0.0586766	0.00497286	5	42126119	-0.05284	0.240307	rs151185798	rs11748684	162372	0.961	42288491	GHR
21	17717977	17718176	21	17720360	17720529	>s600835>s600836>s600837>s600838>s600839<s723361>s600851	0.0226418	0.00500274	21	17718086	0.02255	1	rs11910414	rs2824459	17780	0.969	17700306	C21orf91
21	17717977	17718176	21	17720360	17720529	>s600835>s600836>s600837>s600838>s600839<s723361>s600851	0.0226418	0.00500274	21	17718086	0.02255	1	rs11910414	rs2824459	17780	0.969	17700306	C21orf91
21	17717977	17718176	21	17720360	17720529	>s600835>s600836>s600837>s600838>s600839<s723361>s600851	0.0226418	0.00500274	21	17718086	0.02255	1	rs11910414	rs2824459	17780	0.969	17700306	C21orf91
7	2093364	2093563	7	2101592	2101592	<s812830	-0.0546039	0.00505418	7	2138148	-0.04653	1	rs17132239	rs56085180	34189	0.972	2103959	NA
18	73472735	73472934	18	73475223	73475303	>s526995	0.0618795	0.00527023	18	73396966	-0.04594	1	rs8098695	rs1943816	5579	0.965	73391387	intergenic
11	71419213	71419412	11	71422095	71423479	>s362917>s1490935>s362918	-0.0360775	0.00527384	11	71420943	-0.03307	0.717655	rs7124675	rs1790373	34348	0.969	71455291	NA
1	4150776	4150905	1	4145690	4145743	>s4326	-0.0388381	0.00536461	1	4160035	0.02921	1	rs7513344	rs7513344	0	1	4160035	NA
19	8655841	8656040	19	8656480	8656516	>s534538>s534539>s534540>s534541>s534542>s534543>s534544>s534545>s534546>s680978>s534561	0.0403668	0.00538716	19	8675560	-0.02799	1	rs2043838	rs10422871	3832	0.997	8678966	NA
16	11939201	11939349	16	11939794	11939794	*	0.0225945	0.0054567	16	11962355	-0.01496	1	rs8051343	rs2071336	5462	0.995	11967817	TNFRSF17,LOC729978,SNX29
2	26881781	26881980	2	26888266	26888274	>s53307	0.0245198	0.00549514	2	26857097	-0.01452	1	rs77808205	rs77808205	0	1	26857097	NR
19	49386790	49386963	19	49386527	49386543	*	0.0338994	0.00574486	19	49345090	0.0313	0.697108	rs30007	rs30003	1949	0.997	49343141	NA
19	49386790	49386963	19	49386527	49386543	*	0.0338994	0.00574486	19	49345090	0.0313	0.697108	rs30007	rs30003	1949	0.997	49343141	NA
19	49386790	49386963	19	49386527	49386543	*	0.0338994	0.00574486	19	49345090	0.0313	0.697108	rs30007	rs30006	431	0.991	49344659	NA
19	49386790	49386963	19	49386527	49386543	*	0.0338994	0.00574486	19	49345090	0.0313	0.697108	rs30007	rs30006	431	0.991	49344659	NA
19	49386790	49386963	19	49386527	49386543	*	0.0338994	0.00574486	19	49345090	0.0313	0.697108	rs30007	rs6509428	5534	0.991	49350624	NA
19	49386790	49386963	19	49386527	49386543	*	0.0338994	0.00574486	19	49345090	0.0313	0.697108	rs30007	rs55809481	24174	0.994	49369264	NA
19	49386790	49386963	19	49386527	49386543	*	0.0338994	0.00574486	19	49345090	0.0313	0.697108	rs30007	rs55809481	24174	0.994	49369264	NA
19	49386790	49386963	19	49386527	49386543	*	0.0338994	0.00574486	19	49345090	0.0313	0.697108	rs30007	rs55809481	24174	0.994	49369264	NA
19	49386790	49386963	19	49386527	49386543	*	0.0338994	0.00574486	19	49345090	0.0313	0.697108	rs30007	rs55809481	24174	0.994	49369264	NA
19	49386790	49386963	19	49386527	49386543	*	0.0338994	0.00574486	19	49345090	0.0313	0.697108	rs30007	rs55809481	24174	0.994	49369264	NA
9	102094024	102094223	9	102088306	102088311	>s313281	0.0338683	0.00574501	9	102095671	-0.01105	1	rs10820055	rs10989824	9885	0.981	102105556	GRIN3A
1	243486798	243486997	1	243484092	243484144	>s45586	0.0257335	0.00577609	1	243388542	-0.02135	1	rs72759858	rs2802728	33693	0.955	243354849	SDCCAG8
12	88697453	88697652	12	88701690	88701690	*	-0.0272682	0.00588073	12	88617474	-0.02243	1	rs34200313	rs34200313	0	1	88617474	NA
6	34123626	34123825	6	34119407	34119407	*	0.031039	0.00593843	6	34068669	-0.02376	0.547312	rs1906953	rs1906953	0	1	34068669	GRM4
6	148405917	148406116	6	148406770	148406830	>s186927	0.0409062	0.00595182	6	148466870	-0.02912	1	rs6930337	rs6930337	0	1	148466870	SASH1
10	97416821	97417020	10	97411228	97411228	*	-0.0389097	0.00597378	10	97324003	0.01434	1	rs6584116	rs6584116	0	1	97324003	NA
19	48043947	48044146	19	48053368	48053628	>s549316>s549317>s549318>s549319>s549320>s549321<s846898<s846897<s846896<s846895<s846894<s846893<s846892<s846891<s846889>s1505445>s549323>s549326>s549327>s549332>s549333<s967666>s549337>s549338>s549339>s549340	0.046538	0.0059872	19	48024645	-0.04428	1	rs2278237	rs3936340	320	0.999	48024325	ELSPBP1
7	5825639	5825838	7	5821733	5821772	>s196777>s196778>s196779	0.0526622	0.0061821	7	5766168	-0.04993	1	rs4263646	rs6958272	11755	0.967	5754413	RNF216
17	17753805	17754004	17	17746042	17746107	>s498139	-0.0572818	0.00627186	17	17708873	0.05075	1	rs77745346	rs12451589	75710	0.957	17784583	NR
19	12829275	12829474	19	12822569	12822665	>s535246	0.0294156	0.00627524	19	12910687	-0.02109	1	rs188028380	rs188028380	0	1	12910687	SYCE2,GCDH
22	38425132	38425331	22	38422741	38422741	*	0.0292761	0.00645601	22	38430794	-0.01769	1	rs11704277	rs11703948	9752	0.965	38421042	Intergenic
22	38425132	38425331	22	38422741	38422741	*	0.0292761	0.00645601	22	38430794	-0.01769	1	rs11704277	rs11703948	9752	0.965	38421042	Intergenic
22	38425132	38425331	22	38422741	38422741	*	0.0292761	0.00645601	22	38430794	-0.01769	1	rs11704277	rs11703948	9752	0.965	38421042	NA
22	38425132	38425331	22	38422741	38422741	*	0.0292761	0.00645601	22	38430794	-0.01769	1	rs11704277	rs11703948	9752	0.965	38421042	NA
22	38425132	38425331	22	38422741	38422741	*	0.0292761	0.00645601	22	38430794	-0.01769	1	rs11704277	rs13057446	9340	0.967	38421454	Intergenic
22	38425132	38425331	22	38422741	38422741	*	0.0292761	0.00645601	22	38430794	-0.01769	1	rs11704277	rs66792787	8942	0.967	38421852	Intergenic
22	38425132	38425331	22	38422741	38422741	*	0.0292761	0.00645601	22	38430794	-0.01769	1	rs11704277	rs11704277	0	1	38430794	Intergenic
22	38425132	38425331	22	38422741	38422741	*	0.0292761	0.00645601	22	38430794	-0.01769	1	rs11704277	rs11704277	0	1	38430794	Intergenic
19	51333717	51333916	19	51339846	51339901	>s550449	0.0363581	0.00652615	19	51278201	-0.03308	1	rs148108087	rs148108087	0	1	51278201	NA
19	51333717	51333916	19	51339846	51339901	>s550449	0.0363581	0.00652615	19	51278201	-0.03308	1	rs148108087	rs148108087	0	1	51278201	NA
19	51333717	51333916	19	51339846	51339901	>s550449	0.0363581	0.00652615	19	51278201	-0.03308	1	rs148108087	rs148108087	0	1	51278201	NR
13	59596433	59596632	13	59598842	59600049	>s410516>s677626>s410517	0.0875151	0.00654971	13	59584130	0.08155	0.865034	rs579303	rs862728	4641	0.991	59579489	NR
19	50941165	50941328	19	50949783	50949783	*	0.034547	0.00661569	19	51024108	0.02627	1	rs1048328	rs1048328	0	1	51024108	KLK11
19	50941165	50941328	19	50949783	50949783	*	0.034547	0.00661569	19	51024108	0.02627	1	rs1048328	rs1048328	0	1	51024108	KLK11
19	50941165	50941328	19	50949783	50949783	*	0.034547	0.00661569	19	51024108	0.02627	1	rs1048328	rs1048328	0	1	51024108	KLK11
19	50941165	50941328	19	50949783	50949783	*	0.034547	0.00661569	19	51024108	0.02627	1	rs1048328	rs1048328	0	1	51024108	NR
19	50941165	50941328	19	50949783	50949783	*	0.034547	0.00661569	19	51024108	0.02627	1	rs1048328	rs1048328	0	1	51024108	NA
11	65917322	65917521	11	65908439	65908506	>s361858	0.0332455	0.00671715	11	66016243	-0.0144	1	rs548435	rs684546	1092	0.997	66015151	CST6,CATSPER1
11	65917322	65917521	11	65908439	65908506	>s361858	0.0332455	0.00671715	11	66016243	-0.0144	1	rs548435	rs668210	201	0.996	66016444	NR
2	19773475	19773674	2	19778810	19778867	>s52663	0.0542119	0.006867	2	19742712	0.03553	1	rs16986953	rs16986953	0	1	19742712	AK097927
2	19773475	19773674	2	19778810	19778867	>s52663	0.0542119	0.006867	2	19742712	0.03553	1	rs16986953	rs16986953	0	1	19742712	AK097927
2	19773475	19773674	2	19778810	19778867	>s52663	0.0542119	0.006867	2	19742712	0.03553	1	rs16986953	rs16986953	0	1	19742712	AK097927
2	19773475	19773674	2	19778810	19778867	>s52663	0.0542119	0.006867	2	19742712	0.03553	1	rs16986953	rs16986953	0	1	19742712	intergenic
2	19773475	19773674	2	19778810	19778867	>s52663	0.0542119	0.006867	2	19742712	0.03553	1	rs16986953	rs16986953	0	1	19742712	intergenic
2	19773475	19773674	2	19778810	19778867	>s52663	0.0542119	0.006867	2	19742712	0.03553	1	rs16986953	rs16986953	0	1	19742712	intergenic
2	19773475	19773674	2	19778810	19778867	>s52663	0.0542119	0.006867	2	19742712	0.03553	1	rs16986953	rs16986953	0	1	19742712	OSR1,LINC00954
2	19773475	19773674	2	19778810	19778867	>s52663	0.0542119	0.006867	2	19742712	0.03553	1	rs16986953	rs16986953	0	1	19742712	OSR1,TTC32
2	19773475	19773674	2	19778810	19778867	>s52663	0.0542119	0.006867	2	19742712	0.03553	1	rs16986953	rs16986953	0	1	19742712	OSR1,LINC00954
2	19773475	19773674	2	19778810	19778867	>s52663	0.0542119	0.006867	2	19742712	0.03553	1	rs16986953	rs16986953	0	1	19742712	OSR1,LINC00954
2	19773475	19773674	2	19778810	19778867	>s52663	0.0542119	0.006867	2	19742712	0.03553	1	rs16986953	rs16986953	0	1	19742712	TTC32
2	19773475	19773674	2	19778810	19778867	>s52663	0.0542119	0.006867	2	19742712	0.03553	1	rs16986953	rs16986953	0	1	19742712	NA
2	19773475	19773674	2	19778810	19778867	>s52663	0.0542119	0.006867	2	19742712	0.03553	1	rs16986953	rs16986953	0	1	19742712	NA
2	19773475	19773674	2	19778810	19778867	>s52663	0.0542119	0.006867	2	19742712	0.03553	1	rs16986953	rs16986953	0	1	19742712	NA
2	19773475	19773674	2	19778810	19778867	>s52663	0.0542119	0.006867	2	19742712	0.03553	1	rs16986953	rs16986953	0	1	19742712	NA
6	145976937	145977136	6	145974539	145982066	>s186778>s186779	0.0336021	0.00690489	6	146040259	0.01559	1	rs75099786	rs80133860	366537	0.95	145673722	EPM2A
6	145976937	145977136	6	145974539	145982066	>s186778>s186779	0.0336021	0.00690489	6	146040259	0.01559	1	rs75099786	rs118046355	217898	0.956	145822361	NR
22	42115462	42115661	22	42112800	42115525	>s634701>s634702>s634703>s634704>s634705>s634706>s634707	0.0326305	0.0069899	22	42020801	-0.02815	1	rs133338	rs133302	25629	0.994	41995172	NR
2	230657091	230657290	2	230661444	230661527	>s81574	0.0431346	0.00702745	2	230577878	0.02803	1	rs113214710	rs113214710	0	1	230577878	AC010149.4
14	50071208	50071407	14	50074360	50074940	*	0.0396067	0.00703683	14	50143434	0.03774	1	rs10483600	rs12586183	42680	0.992	50100754	NA
22	42754874	42755073	22	42757488	42762079	>s634864>s634865>s634866>s634867>s634868>s634869>s634870>s634871	0.0338931	0.00704686	22	42762705	-0.02495	1	rs9611881	rs9611881	0	1	42762705	Y_RNA
9	133329273	133329472	9	133337725	133337725	*	0.0291922	0.0071191	9	133289021	0.01905	1	rs176694	rs176694	0	1	133289021	NA
12	11173593	11173792	12	11177571	11197609	>s372494>s372495>s372496>s372497>s372498>s372499>s372500>s372501>s372502	-0.0241591	0.00721485	12	11170612	0.01952	0.419292	rs61928618	rs7294858	196634	0.965	10973978	NA
18	21354543	21354742	18	21347870	21348048	>s521907	0.0379525	0.00721934	18	21342592	-0.01735	1	rs72881360	rs72882867	168479	0.971	21511071	GREB1L
11	64375398	64375597	11	64377526	64377526	<s823719	-0.0246698	0.00732913	11	64376537	-0.01968	0.667003	rs11231774	rs559928	6361	0.997	64382898	RPS6KA4,CCDC88B,TRPT1,FLRT1
11	64375398	64375597	11	64377526	64377526	<s823719	-0.0246698	0.00732913	11	64376537	-0.01968	0.667003	rs11231774	rs559928	6361	0.997	64382898	NR
11	64375398	64375597	11	64377526	64377526	<s823719	-0.0246698	0.00732913	11	64376537	-0.01968	0.667003	rs11231774	rs559928	6361	0.997	64382898	NR
11	64375398	64375597	11	64377526	64377526	<s823719	-0.0246698	0.00732913	11	64376537	-0.01968	0.667003	rs11231774	rs559928	6361	0.997	64382898	NR
11	64375398	64375597	11	64377526	64377526	<s823719	-0.0246698	0.00732913	11	64376537	-0.01968	0.667003	rs11231774	rs559928	6361	0.997	64382898	intergenic
11	64375398	64375597	11	64377526	64377526	<s823719	-0.0246698	0.00732913	11	64376537	-0.01968	0.667003	rs11231774	rs559928	6361	0.997	64382898	TRPT1,DNAJC4,VEGFB,FKBP2,TEX40,TRMT112,PRDX5,FERMT3,NUDT22,PPP1R14B,PLCB3,BAD,GPR137,KCNK4,ESRRA,CCDC88B,RPS6KA4,STIP1
17	8086955	8087154	17	8093874	8093972	>s496875	0.0309541	0.0074135	17	8017688	-0.0218	1	rs80076597	rs78671965	61689	0.951	7955999	NA
12	122123414	122123613	12	122121018	122121018	>s1250717	0.0261341	0.00745304	12	122133584	0.02046	0.363702	rs36045144	rs144305620	34604	0.975	122098980	NA
12	122123414	122123613	12	122121018	122121018	>s1250717	0.0261341	0.00745304	12	122133584	0.02046	0.363702	rs36045144	rs11061153	3098	0.986	122130486	NA
12	122123414	122123613	12	122121018	122121018	>s1250717	0.0261341	0.00745304	12	122133584	0.02046	0.363702	rs36045144	rs36045144	0	1	122133584	MLXIP
12	122123414	122123613	12	122121018	122121018	>s1250717	0.0261341	0.00745304	12	122133584	0.02046	0.363702	rs36045144	rs11057509	8250	0.987	122141834	MLXIP
12	122123414	122123613	12	122121018	122121018	>s1250717	0.0261341	0.00745304	12	122133584	0.02046	0.363702	rs36045144	rs1043763	12778	0.953	122146362	MLXIP
12	121812738	121812937	12	121818674	121818674	*	-0.050266	0.00765186	12	121830790	0.02007	1	rs11043207	rs11043207	0	1	121830790	SETD1B
12	121812738	121812937	12	121818674	121818674	*	-0.050266	0.00765186	12	121830790	0.02007	1	rs11043207	rs11043207	0	1	121830790	SETD1B
2	147816933	147817132	2	147816842	147817986	>s74324	0.057918	0.00766823	2	147775069	0.03363	1	rs62169465	rs62169465	0	1	147775069	NA
2	206249897	206250096	2	206249874	206249890	>s79207>s79208<s803674<s803673>s79209	0.0323573	0.00783196	2	206201750	-0.03022	1	rs115319174	rs115067791	33168	0.96	206168582	NR
2	206249897	206250096	2	206249874	206249890	>s79207>s79208<s803674<s803673>s79209	0.0323573	0.00783196	2	206201750	-0.03022	1	rs115319174	rs115067791	33168	0.96	206168582	NR
2	206249897	206250096	2	206249874	206249890	>s79207>s79208<s803674<s803673>s79209	0.0323573	0.00783196	2	206201750	-0.03022	1	rs115319174	rs114670539	2139	0.997	206199611	NR
2	206249897	206250096	2	206249874	206249890	>s79207>s79208<s803674<s803673>s79209	0.0323573	0.00783196	2	206201750	-0.03022	1	rs115319174	rs114670539	2139	0.997	206199611	GPR1
2	206249897	206250096	2	206249874	206249890	>s79207>s79208<s803674<s803673>s79209	0.0323573	0.00783196	2	206201750	-0.03022	1	rs115319174	rs115319174	0	1	206201750	GPR1
3	170925664	170925863	3	170920421	170926944	>s108417>s108418>s108419>s108420	0.0626911	0.00785949	3	170948310	-0.02239	1	rs71306686	rs13059911	4723	0.998	170953033	NA
11	2468674	2468873	11	2459520	2459718	>s351473	0.0287207	0.00796639	11	2369831	-0.02156	1	rs800132	rs800132	0	1	2369831	NR
18	79767487	79767686	18	79764511	79764902	>s530047>s530048>s530049>s530050>s680426>s530051>s530052>s530053<s796122>s530055>s530056	-0.0426812	0.00800026	18	79767195	-0.03897	0.0117149	rs523386	rs142014757	15927	0.99	79751268	NA
17	45183572	45183771	17	45180411	45180411	*	-0.0182136	0.00811365	17	45127896	0.0124	1	rs117873694	rs739454	10058	0.995	45117838	PLCD3
1	31824820	31825019	1	31820321	31820391	>s9136	0.0388889	0.00812579	1	31805042	0.02647	1	rs75570615	rs75570615	0	1	31805042	SPOCD1
5	53229759	53229958	5	53239896	53240557	>s157896	0.0312184	0.008172	5	53261764	-0.02378	1	rs38059	rs38059	0	1	53261764	LOC257396,FST
5	53229759	53229958	5	53239896	53240557	>s157896	0.0312184	0.008172	5	53261764	-0.02378	1	rs38059	rs251526	28991	0.979	53290755	FST
12	124424605	124424804	12	124431081	124431196	>s387679	0.0332365	0.00818736	12	124368870	-0.02808	1	rs12369200	rs12369200	0	1	124368870	NR
2	217999340	217999539	2	218000900	218000988	>s80264	0.0586822	0.00820611	2	218088552	-0.03068	1	rs10427230	rs2234671	75833	0.98	218164385	CXCR1
18	76405072	76405271	18	76401755	76401766	>s527487	0.0290316	0.00824522	18	76364065	-0.02097	1	rs72973714	rs4375747	4238	0.995	76359827	NA
18	76405072	76405271	18	76401755	76401766	>s527487	0.0290316	0.00824522	18	76364065	-0.02097	1	rs72973714	rs72973711	3775	0.995	76360290	ZNF516
18	76405072	76405271	18	76401755	76401766	>s527487	0.0290316	0.00824522	18	76364065	-0.02097	1	rs72973714	rs72973711	3775	0.995	76360290	NA
18	76405072	76405271	18	76401755	76401766	>s527487	0.0290316	0.00824522	18	76364065	-0.02097	1	rs72973714	rs72973711	3775	0.995	76360290	NR
18	76405072	76405271	18	76401755	76401766	>s527487	0.0290316	0.00824522	18	76364065	-0.02097	1	rs72973714	rs72973711	3775	0.995	76360290	NR
18	76405072	76405271	18	76401755	76401766	>s527487	0.0290316	0.00824522	18	76364065	-0.02097	1	rs72973714	rs72973711	3775	0.995	76360290	NR
18	76405072	76405271	18	76401755	76401766	>s527487	0.0290316	0.00824522	18	76364065	-0.02097	1	rs72973714	rs72973711	3775	0.995	76360290	NR
18	76405072	76405271	18	76401755	76401766	>s527487	0.0290316	0.00824522	18	76364065	-0.02097	1	rs72973714	rs72973711	3775	0.995	76360290	NA
18	76405072	76405271	18	76401755	76401766	>s527487	0.0290316	0.00824522	18	76364065	-0.02097	1	rs72973714	rs72973714	0	1	76364065	ZNF516
18	76405072	76405271	18	76401755	76401766	>s527487	0.0290316	0.00824522	18	76364065	-0.02097	1	rs72973714	rs72973714	0	1	76364065	ZNF516
18	76405072	76405271	18	76401755	76401766	>s527487	0.0290316	0.00824522	18	76364065	-0.02097	1	rs72973714	rs72973714	0	1	76364065	NR
18	76405072	76405271	18	76401755	76401766	>s527487	0.0290316	0.00824522	18	76364065	-0.02097	1	rs72973714	rs72973714	0	1	76364065	ZNF516
18	76405072	76405271	18	76401755	76401766	>s527487	0.0290316	0.00824522	18	76364065	-0.02097	1	rs72973714	rs72973714	0	1	76364065	ZNF516
11	70255251	70255450	11	70251618	70254854	>s362680>s362681>s362682	-0.0245522	0.00837296	11	70247466	0.01504	1	rs72945112	rs72945112	0	1	70247466	FADD
3	40473321	40473520	3	40475235	40475235	*	0.0222789	0.00837417	3	40420535	-0.01836	1	rs1466237	rs9822909	4942	0.967	40415593	NR
5	131290500	131290598	5	131298628	131299869	>s164867>s164868	-0.0256401	0.00840578	5	131283173	-0.02406	1	rs80311787	rs1291602	147796	0.965	131430969	AC008695.1
5	131290500	131290598	5	131298628	131299869	>s164867>s164868	-0.0256401	0.00840578	5	131283173	-0.02406	1	rs80311787	rs1291602	147796	0.965	131430969	AC008695.1
5	131290500	131290598	5	131298628	131299869	>s164867>s164868	-0.0256401	0.00840578	5	131283173	-0.02406	1	rs80311787	rs1291602	147796	0.965	131430969	AC008695.1
4	86889184	86889383	4	86890202	86890207	>s972042	-0.0251013	0.00854705	4	86953422	-0.02241	0.723751	rs13112444	rs34077745	31122	0.994	86984544	AFF1
8	143507904	143508103	8	143498707	143498791	>s243038>s243039	0.0182069	0.00859641	8	143575430	-0.01219	1	rs2290416	rs2290416	0	1	143575430	NAPRT1
5	10510678	10510877	5	10512963	10512976	>s145676	0.0239213	0.00864484	5	10500534	-0.02376	1	rs143537377	rs143537377	0	1	10500534	ROPN1L
9	133397168	133397367	9	133391286	133391293	<s829787	-0.0403097	0.00865788	9	133412676	-0.03996	0.373657	rs28729896	rs28493251	34526	0.953	133376399	NR
9	133397168	133397367	9	133391286	133391293	<s829787	-0.0403097	0.00865788	9	133412676	-0.03996	0.373657	rs28729896	rs28493251	34526	0.953	133376399	NR
9	133397168	133397367	9	133391286	133391293	<s829787	-0.0403097	0.00865788	9	133412676	-0.03996	0.373657	rs28729896	rs4962144	2655	0.986	133410021	NR
7	46706207	46706406	7	46697328	46697328	<s1094672	-0.0453117	0.00876654	7	46700736	-0.03434	1	rs76762387	rs117865101	15464	0.988	46716200	NR
7	121437312	121437511	7	121444111	121444111	*	0.0438396	0.00876935	7	121414424	-0.02705	1	rs6974427	rs6962549	3430	0.99	121410994	NR
7	121437312	121437511	7	121444111	121444111	*	0.0438396	0.00876935	7	121414424	-0.02705	1	rs6974427	rs6974427	0	1	121414424	NR
20	47833458	47833657	20	47834668	47834669	>s572846>s572847>s572848>s572849>s572850>s572851>s572852>s572853<s845468>s572856>s572857>s572858>s913913>s572882>s572883<s783165<s845466<s845465<s845464<s845463<s845462<s845461<s845460<s845459<s845458<s783164<s783163>s572884>s572885>s572886>s572887>s572888>s572889>s572890>s572891<s713297>s572892>s572893>s572894>s572895>s572896>s572897>s572898>s572899>s572900>s572901>s572902>s572903>s572904<s10242…	0.0459655	0.00878401	20	47860118	0.03673	1	rs3810529	rs6122625	15424	0.978	47844694	NR
11	47339381	47339580	11	47341818	47341818	*	0.0343374	0.00885588	11	47349579	0.01443	1	rs11570054	rs11570054	0	1	47349579	MYBPC3
11	47339381	47339580	11	47341818	47341818	*	0.0343374	0.00885588	11	47349579	0.01443	1	rs11570054	rs11570054	0	1	47349579	NA
4	171020793	171020992	4	171019991	171019991	*	0.0155661	0.00897856	4	170945757	-0.01355	1	rs17185849	rs967616	21314	0.972	170967071	LOC100506122
1	45301253	45301452	1	45301278	45302909	>s10659	-0.0198784	0.00898419	1	45345193	0.01597	1	rs17853159	rs17853159	0	1	45345193	TESK2
1	45301253	45301452	1	45301278	45302909	>s10659	-0.0198784	0.00898419	1	45345193	0.01597	1	rs17853159	rs17853159	0	1	45345193	TESK2
1	45301253	45301452	1	45301278	45302909	>s10659	-0.0198784	0.00898419	1	45345193	0.01597	1	rs17853159	rs17853159	0	1	45345193	TESK2
1	45301253	45301452	1	45301278	45302909	>s10659	-0.0198784	0.00898419	1	45345193	0.01597	1	rs17853159	rs17853159	0	1	45345193	NR
1	45301253	45301452	1	45301278	45302909	>s10659	-0.0198784	0.00898419	1	45345193	0.01597	1	rs17853159	rs17853159	0	1	45345193	NR
1	45301253	45301452	1	45301278	45302909	>s10659	-0.0198784	0.00898419	1	45345193	0.01597	1	rs17853159	rs17853159	0	1	45345193	TESK2
1	45301253	45301452	1	45301278	45302909	>s10659	-0.0198784	0.00898419	1	45345193	0.01597	1	rs17853159	rs17853159	0	1	45345193	TESK2
1	45301253	45301452	1	45301278	45302909	>s10659	-0.0198784	0.00898419	1	45345193	0.01597	1	rs17853159	rs17853159	0	1	45345193	TESK2
1	45301253	45301452	1	45301278	45302909	>s10659	-0.0198784	0.00898419	1	45345193	0.01597	1	rs17853159	rs17853159	0	1	45345193	TESK2
19	11272624	11272823	19	11271321	11271321	*	0.027609	0.00902855	19	11214289	-0.02082	1	rs34243815	rs34243815	0	1	11214289	NR
19	11272624	11272823	19	11271321	11271321	*	0.027609	0.00902855	19	11214289	-0.02082	1	rs34243815	rs34243815	0	1	11214289	NR
6	32387877	32388076	6	32384844	32384880	>s804445>s804446>s175378	0.0647181	0.00908139	6	32388796	0.06305	0.0537464	rs62402735	rs17202393	4912	1	32393708	BTNL2,HCG23
16	23755370	23755569	16	23748141	23748141	*	-0.0348659	0.00912392	16	23785136	-0.01876	1	rs67386153	rs55869023	1722	0.997	23783414	NA
16	23755370	23755569	16	23748141	23748141	*	-0.0348659	0.00912392	16	23785136	-0.01876	1	rs67386153	rs66815895	1055	1	23786191	NA
20	63675443	63675446	20	63682333	63682333	*	-0.0265084	0.00920263	20	63664894	-0.02525	1	rs75671088	rs6011002	1555	1	63666449	RTEL1
16	30069755	30069954	16	30064219	30064219	*	0.0256945	0.00921095	16	30039284	-0.02049	1	rs147553474	rs147553474	0	1	30039284	NR
2	43669429	43669628	2	43660430	43666509	>s54892	0.0440628	0.00927628	2	43763690	-0.02272	1	rs10203287	rs10206087	21571	0.951	43785261	NR
16	88312111	88312310	16	88314274	88314283	>s491447	0.0656262	0.0092834	16	88265189	0.03465	1	rs112898929	rs112898929	0	1	88265189	NA
16	88312111	88312310	16	88314274	88314283	>s491447	0.0656262	0.0092834	16	88265189	0.03465	1	rs112898929	rs112898929	0	1	88265189	NA
16	88312111	88312310	16	88314274	88314283	>s491447	0.0656262	0.0092834	16	88265189	0.03465	1	rs112898929	rs112898929	0	1	88265189	NA
16	88312111	88312310	16	88314274	88314283	>s491447	0.0656262	0.0092834	16	88265189	0.03465	1	rs112898929	rs112898929	0	1	88265189	AC138512.1
17	81614296	81614455	17	81610991	81610991	>s679784	0.0303344	0.00934568	17	81553105	-0.02564	1	rs74002425	rs14422	11731	0.988	81541374	NR
11	116512460	116512659	11	116509949	116509949	*	0.0419391	0.00938565	11	116586398	-0.03281	1	rs75243489	rs4936356	25594	0.957	116560804	BUD13,ZNF259,APOA5,APOA4,APOC3,APOA1,SIK3,CADM1
11	32488119	32488318	11	32487231	32487316	>s354845	0.0336044	0.00953354	11	32581902	0.03234	1	rs80143316	rs114861240	26435	0.998	32608337	NA
11	32488119	32488318	11	32487231	32487316	>s354845	0.0336044	0.00953354	11	32581902	0.03234	1	rs80143316	rs78865122	243245	0.968	32825147	NR
6	64292371	64292570	6	64296528	64296528	>s671822	-0.0311193	0.00956632	6	64344643	-0.02818	0.575384	rs9362726	rs35906288	168216	0.979	64176427	NR
6	64292371	64292570	6	64296528	64296528	>s671822	-0.0311193	0.00956632	6	64344643	-0.02818	0.575384	rs9362726	rs9353651	103089	0.993	64241554	Intergenic
6	64292371	64292570	6	64296528	64296528	>s671822	-0.0311193	0.00956632	6	64344643	-0.02818	0.575384	rs9362726	rs9353806	94649	0.979	64439292	EYS
1	179655790	179655989	1	179647211	179647220	>s38740	0.0345489	0.00959138	1	179705650	-0.02478	1	rs11811588	rs12070589	112078	0.972	179593572	NR
8	21692430	21692629	8	21697084	21697111	>s229522>s229523>s229524	0.0386266	0.00961004	8	21629619	0.03352	1	rs10110287	rs10110287	0	1	21629619	GFRA2
6	24220870	24220904	6	24220870	24220915	>s174158>s174159>s174160>s174161	0.0201501	0.00962883	6	24241373	0.01371	1	rs114676109	rs114676109	0	1	24241373	NR
2	207608782	207608981	2	207610974	207612060	>s79339>s79340>s79341	-0.0170723	0.00972645	2	207584422	0.0167	0.0860828	rs34903544	rs2551949	28706	0.992	207613128	NR
2	41782094	41782293	2	41778844	41782395	>s54678	0.0639168	0.00977045	2	41880735	0.05073	1	rs13419840	rs13426621	1596	0.955	41882331	LOC388942
7	46858601	46858800	7	46865068	46865068	<s734816	-0.0229578	0.00979517	7	46899708	-0.02029	0.633045	rs6952813	rs12702271	4453	1	46904161	IGFBP3,TNS3
7	46858601	46858800	7	46865068	46865068	<s734816	-0.0229578	0.00979517	7	46899708	-0.02029	0.633045	rs6952813	rs12702271	4453	1	46904161	NR
13	78426139	78426338	13	78424160	78424599	*	0.0220648	0.0102083	13	78399088	-0.0214	1	rs4884091	rs4884091	0	1	78399088	NR
3	128154162	128154361	3	128150928	128150963	>s104537	-0.0278802	0.0102474	3	128075405	-0.01516	1	rs11709060	rs11709060	0	1	128075405	NA
3	49122528	49122727	3	49124447	49124629	>s90671	0.0388428	0.0103773	3	49082573	-0.0278	1	rs111494817	rs113011189	130001	0.974	49212574	NR
3	49122528	49122727	3	49124447	49124629	>s90671	0.0388428	0.0103773	3	49082573	-0.0278	1	rs111494817	rs113011189	130001	0.974	49212574	NR
6	15200607	15200806	6	15203362	15203362	*	0.02415	0.0104161	6	15215698	0.01809	1	rs9464772	rs35003605	39671	0.973	15176027	NA
6	15200607	15200806	6	15203362	15203362	*	0.02415	0.0104161	6	15215698	0.01809	1	rs9464772	rs35003605	39671	0.973	15176027	NA
6	15200607	15200806	6	15203362	15203362	*	0.02415	0.0104161	6	15215698	0.01809	1	rs9464772	rs9464760	35423	0.974	15180275	intergenic
6	15200607	15200806	6	15203362	15203362	*	0.02415	0.0104161	6	15215698	0.01809	1	rs9464772	rs9464760	35423	0.974	15180275	intergenic
6	15200607	15200806	6	15203362	15203362	*	0.02415	0.0104161	6	15215698	0.01809	1	rs9464772	rs13198761	34052	0.974	15181646	NR
6	15200607	15200806	6	15203362	15203362	*	0.02415	0.0104161	6	15215698	0.01809	1	rs9464772	rs13198761	34052	0.974	15181646	NR
17	62230893	62231092	17	62240030	62240030	*	0.0503696	0.0104743	17	62144541	-0.04191	1	rs117639668	rs142151479	2100	0.989	62142441	Intergenic
17	62230893	62231092	17	62240030	62240030	*	0.0503696	0.0104743	17	62144541	-0.04191	1	rs117639668	rs142151479	2100	0.989	62142441	Intergenic
17	28465383	28465582	17	28458974	28459054	>s505306	0.0353053	0.0108027	17	28532159	-0.01442	1	rs62066769	rs62066768	782	1	28531377	FOXN1
17	28465383	28465582	17	28458974	28459054	>s505306	0.0353053	0.0108027	17	28532159	-0.01442	1	rs62066769	rs62066768	782	1	28531377	FOXN1
19	11190154	11190198	19	11194611	11194611	*	0.0512735	0.0108181	19	11098900	-0.03942	1	rs17248769	rs2228671	1336	0.999	11100236	LDLR
19	11190154	11190198	19	11194611	11194611	*	0.0512735	0.0108181	19	11098900	-0.03942	1	rs17248769	rs2228671	1336	0.999	11100236	LDLR
19	11190154	11190198	19	11194611	11194611	*	0.0512735	0.0108181	19	11098900	-0.03942	1	rs17248769	rs2228671	1336	0.999	11100236	NR
19	11190154	11190198	19	11194611	11194611	*	0.0512735	0.0108181	19	11098900	-0.03942	1	rs17248769	rs2228671	1336	0.999	11100236	NR
19	11190154	11190198	19	11194611	11194611	*	0.0512735	0.0108181	19	11098900	-0.03942	1	rs17248769	rs2228671	1336	0.999	11100236	LDLR
19	11190154	11190198	19	11194611	11194611	*	0.0512735	0.0108181	19	11098900	-0.03942	1	rs17248769	rs2228671	1336	0.999	11100236	LDLR
19	11190154	11190198	19	11194611	11194611	*	0.0512735	0.0108181	19	11098900	-0.03942	1	rs17248769	rs2228671	1336	0.999	11100236	LDLR
19	11190154	11190198	19	11194611	11194611	*	0.0512735	0.0108181	19	11098900	-0.03942	1	rs17248769	rs2228671	1336	0.999	11100236	LDLR
17	4186565	4186764	17	4189636	4189636	*	0.0411551	0.0108694	17	4093256	-0.02362	1	rs8066707	rs7221595	11044	0.998	4104300	ZZEF1,CYB5D2,ANKFY1
17	4186565	4186764	17	4189636	4189636	*	0.0411551	0.0108694	17	4093256	-0.02362	1	rs8066707	rs67572826	34907	0.998	4128163	NA
17	4186565	4186764	17	4189636	4189636	*	0.0411551	0.0108694	17	4093256	-0.02362	1	rs8066707	rs12453376	36235	0.998	4129491	NA
2	95876002	95876201	2	95878975	95878975	*	0.0392859	0.0109302	2	96025125	0.016	1	rs2438972	rs2579519	15707	0.983	96009418	GPAT2,FAHD2CP
16	83171906	83172105	16	83167521	83176121	>s489958	0.0558094	0.0110173	16	83114550	0.05431	1	rs72798373	rs9922134	4702	0.988	83109848	CDH13
4	68906033	68906232	4	68902028	68902082	>s127917	0.0385792	0.0110728	4	68815215	-0.03707	0.116371	rs294775	rs10023464	21195	0.986	68794020	UGT2B10
4	68906033	68906232	4	68902028	68902082	>s127917	0.0385792	0.0110728	4	68815215	-0.03707	0.116371	rs294775	rs10023464	21195	0.986	68794020	UGT2B4,UGT2B7,UGT2A3,UGT2B10,UGT2B11,UGT2B15,UGT2B28
4	68906033	68906232	4	68902028	68902082	>s127917	0.0385792	0.0110728	4	68815215	-0.03707	0.116371	rs294775	rs10023464	21195	0.986	68794020	CTD-2005D20.1
4	68906033	68906232	4	68902028	68902082	>s127917	0.0385792	0.0110728	4	68815215	-0.03707	0.116371	rs294775	rs10000284	11750	0.991	68803465	NA
4	68906033	68906232	4	68902028	68902082	>s127917	0.0385792	0.0110728	4	68815215	-0.03707	0.116371	rs294775	rs10000284	11750	0.991	68803465	RP11-468N14.1
4	68906033	68906232	4	68902028	68902082	>s127917	0.0385792	0.0110728	4	68815215	-0.03707	0.116371	rs294775	rs10000284	11750	0.991	68803465	NA
4	68906033	68906232	4	68902028	68902082	>s127917	0.0385792	0.0110728	4	68815215	-0.03707	0.116371	rs294775	rs294775	0	1	68815215	NA
4	68906033	68906232	4	68902028	68902082	>s127917	0.0385792	0.0110728	4	68815215	-0.03707	0.116371	rs294775	rs11725502	9	0.995	68815224	UGT2B10
4	68906033	68906232	4	68902028	68902082	>s127917	0.0385792	0.0110728	4	68815215	-0.03707	0.116371	rs294775	rs61750900	1003	0.989	68816218	NR
4	68906033	68906232	4	68902028	68902082	>s127917	0.0385792	0.0110728	4	68815215	-0.03707	0.116371	rs294775	rs61750900	1003	0.989	68816218	NR
4	68906033	68906232	4	68902028	68902082	>s127917	0.0385792	0.0110728	4	68815215	-0.03707	0.116371	rs294775	rs294778	1622	0.998	68816837	NA
16	84853131	84853330	16	84849227	84849227	*	0.0409381	0.0110869	16	84754722	0.03531	1	rs17764258	rs11641007	12257	0.985	84742465	NR
5	128415367	128415566	5	128413399	128413489	>s164650	0.0488376	0.0111602	5	128339663	0.02564	1	rs3909897	rs10057855	1010	1	128340673	FBN2
11	10238605	10238804	11	10238501	10239767	*	-0.0573826	0.0112749	11	10277774	-0.03874	1	rs2920154	rs113139575	3100	0.997	10274674	SBF2
11	10238605	10238804	11	10238501	10239767	*	-0.0573826	0.0112749	11	10277774	-0.03874	1	rs2920154	rs113139575	3100	0.997	10274674	SBF2
11	10238605	10238804	11	10238501	10239767	*	-0.0573826	0.0112749	11	10277774	-0.03874	1	rs2920154	rs17368443	2485	0.997	10275289	SBF2
19	58604456	58604655	19	58605628	58605629	<s700996	0.0933176	0.0114202	19	58567729	0.07822	1	rs73068325	rs11669345	16837	0.991	58550892	UBE2M,CHMP2A,TRIM28
19	58604456	58604655	19	58605628	58605629	<s700996	0.0933176	0.0114202	19	58567729	0.07822	1	rs73068325	rs73068325	0	1	58567729	NR
7	73419117	73419316	7	73424215	73424215	*	0.0324171	0.0115009	7	73475911	-0.01789	1	rs181981038	rs181981038	0	1	73475911	BAZ1B
7	73419117	73419316	7	73424215	73424215	*	0.0324171	0.0115009	7	73475911	-0.01789	1	rs181981038	rs181981038	0	1	73475911	BAZ1B
7	73419117	73419316	7	73424215	73424215	*	0.0324171	0.0115009	7	73475911	-0.01789	1	rs181981038	rs17145717	39367	0.981	73515278	NR
7	73419117	73419316	7	73424215	73424215	*	0.0324171	0.0115009	7	73475911	-0.01789	1	rs181981038	rs17145717	39367	0.981	73515278	BAZ1B
6	84690577	84690776	6	84687775	84687869	>s181597	0.0339165	0.011551	6	84606159	-0.01776	1	rs17793474	rs72908667	57914	0.984	84664073	NA
2	1737664	1737863	2	1738161	1738167	>s49275	0.0250301	0.0115598	2	1778365	-0.02455	1	rs6711954	rs6711954	0	1	1778365	NR
17	572805	573004	17	575782	575782	*	0.051313	0.0117448	17	666521	-0.03134	1	rs12945829	rs11657201	30163	0.994	696684	VPS53
14	103372478	103372484	14	103372147	103372192	>s444123	0.0341822	0.0118375	14	103397139	0.02709	1	rs11627052	rs11627567	11701	0.987	103385438	NA
14	103372478	103372484	14	103372147	103372192	>s444123	0.0341822	0.0118375	14	103397139	0.02709	1	rs11627052	rs11627052	0	1	103397139	MARK3
6	2908758	2908957	6	2907267	2907327	*	0.0411782	0.0118402	6	2908668	0.03692	1	rs79567239	rs12192148	5390	0.97	2903278	NR
10	118246139	118246338	10	118246140	118246140	*	-0.0301157	0.0118738	10	118284920	0.01418	1	rs55744556	rs55744556	0	1	118284920	NA
20	34369348	34369455	20	34359278	34359713	>s571330>s571331	0.0371032	0.0118892	20	34315198	0.01714	1	rs78836409	rs78836409	0	1	34315198	AHCY
19	40274104	40274303	19	40281617	40281765	>s547725	-0.0304874	0.0119725	19	40226038	0.01797	1	rs874269	rs35090721	77494	0.973	40303532	RNU6-945P
19	40274104	40274303	19	40281617	40281765	>s547725	-0.0304874	0.0119725	19	40226038	0.01797	1	rs874269	rs67587726	85017	0.959	40311055	NR
19	40274104	40274303	19	40281617	40281765	>s547725	-0.0304874	0.0119725	19	40226038	0.01797	1	rs874269	rs11667768	122487	0.956	40348525	NA
15	75495296	75495495	15	75501359	75501359	*	0.0427857	0.0120633	15	75589459	-0.03364	1	rs145657394	rs75772464	17210	0.981	75606669	NR
15	75495296	75495495	15	75501359	75501359	*	0.0427857	0.0120633	15	75589459	-0.03364	1	rs145657394	rs75772464	17210	0.981	75606669	NR
15	75495296	75495495	15	75501359	75501359	*	0.0427857	0.0120633	15	75589459	-0.03364	1	rs145657394	rs75772464	17210	0.981	75606669	NR
15	24548076	24548275	15	24548489	24548489	<s688949<s688948<s688947	0.0394678	0.0120748	15	24536275	0.03895	0.20293	rs12915094	rs11858159	42766	0.992	24579041	PWRN1
17	36095708	36095899	17	36095533	36095621	*	0.0268399	0.0125457	17	36098851	0.02599	0.269421	rs1634508	rs2188974	11609	0.952	36087290	CCL3
17	36095708	36095899	17	36095533	36095621	*	0.0268399	0.0125457	17	36098851	0.02599	0.269421	rs1634508	rs1634517	6158	0.989	36105010	NA
12	53060633	53060832	12	53057225	53057328	>s380406	0.0267384	0.0125626	12	53046995	-0.0155	1	rs73099903	rs73099903	0	1	53046995	LOC283335
12	53060633	53060832	12	53057225	53057328	>s380406	0.0267384	0.0125626	12	53046995	-0.0155	1	rs73099903	rs73099903	0	1	53046995	LOC283335
12	53060633	53060832	12	53057225	53057328	>s380406	0.0267384	0.0125626	12	53046995	-0.0155	1	rs73099903	rs73099903	0	1	53046995	LOC283335
11	21821260	21821459	11	21820836	21821949	>s353752	0.0456542	0.0126082	11	21851196	-0.03539	1	rs10833647	rs12420752	6281	0.999	21844915	NR
19	33152331	33152530	19	33159134	33159134	*	0.0826409	0.0128821	19	33230549	0.05591	1	rs10414065	rs10414065	0	1	33230549	SLC7A10,CEBPA
19	33152331	33152530	19	33159134	33159134	*	0.0826409	0.0128821	19	33230549	0.05591	1	rs10414065	rs10414065	0	1	33230549	SLC7A10
19	33152331	33152530	19	33159134	33159134	*	0.0826409	0.0128821	19	33230549	0.05591	1	rs10414065	rs10414065	0	1	33230549	SLC7A10
19	33152331	33152530	19	33159134	33159134	*	0.0826409	0.0128821	19	33230549	0.05591	1	rs10414065	rs10414065	0	1	33230549	LRP3,CEBPA
19	33152331	33152530	19	33159134	33159134	*	0.0826409	0.0128821	19	33230549	0.05591	1	rs10414065	rs10414065	0	1	33230549	LRP3,CEBPA
19	33152331	33152530	19	33159134	33159134	*	0.0826409	0.0128821	19	33230549	0.05591	1	rs10414065	rs10414065	0	1	33230549	SLC7A10
19	33152331	33152530	19	33159134	33159134	*	0.0826409	0.0128821	19	33230549	0.05591	1	rs10414065	rs10414065	0	1	33230549	SLC7A10
19	33152331	33152530	19	33159134	33159134	*	0.0826409	0.0128821	19	33230549	0.05591	1	rs10414065	rs118013485	5122	0.955	33235671	NA
19	33152331	33152530	19	33159134	33159134	*	0.0826409	0.0128821	19	33230549	0.05591	1	rs10414065	rs118013485	5122	0.955	33235671	NR
19	33152331	33152530	19	33159134	33159134	*	0.0826409	0.0128821	19	33230549	0.05591	1	rs10414065	rs118013485	5122	0.955	33235671	SLC7A10
19	33152331	33152530	19	33159134	33159134	*	0.0826409	0.0128821	19	33230549	0.05591	1	rs10414065	rs118013485	5122	0.955	33235671	NR
19	33152331	33152530	19	33159134	33159134	*	0.0826409	0.0128821	19	33230549	0.05591	1	rs10414065	rs117710327	5123	0.956	33235672	NA
19	33152331	33152530	19	33159134	33159134	*	0.0826409	0.0128821	19	33230549	0.05591	1	rs10414065	rs117710327	5123	0.956	33235672	NA
19	33152331	33152530	19	33159134	33159134	*	0.0826409	0.0128821	19	33230549	0.05591	1	rs10414065	rs117710327	5123	0.956	33235672	SLC7A10,CEBPA
19	33152331	33152530	19	33159134	33159134	*	0.0826409	0.0128821	19	33230549	0.05591	1	rs10414065	rs117710327	5123	0.956	33235672	SLC7A10,CEBPA
19	33152331	33152530	19	33159134	33159134	*	0.0826409	0.0128821	19	33230549	0.05591	1	rs10414065	rs117710327	5123	0.956	33235672	SLC7A10,CEBPA
19	33152331	33152530	19	33159134	33159134	*	0.0826409	0.0128821	19	33230549	0.05591	1	rs10414065	rs117710327	5123	0.956	33235672	SLC7A10
19	33152331	33152530	19	33159134	33159134	*	0.0826409	0.0128821	19	33230549	0.05591	1	rs10414065	rs117710327	5123	0.956	33235672	SLC7A10
19	33152331	33152530	19	33159134	33159134	*	0.0826409	0.0128821	19	33230549	0.05591	1	rs10414065	rs117710327	5123	0.956	33235672	NR
19	33152331	33152530	19	33159134	33159134	*	0.0826409	0.0128821	19	33230549	0.05591	1	rs10414065	rs117710327	5123	0.956	33235672	SLC7A10
19	33152331	33152530	19	33159134	33159134	*	0.0826409	0.0128821	19	33230549	0.05591	1	rs10414065	rs117710327	5123	0.956	33235672	NR
19	33152331	33152530	19	33159134	33159134	*	0.0826409	0.0128821	19	33230549	0.05591	1	rs10414065	rs117710327	5123	0.956	33235672	SLC7A10
19	33152331	33152530	19	33159134	33159134	*	0.0826409	0.0128821	19	33230549	0.05591	1	rs10414065	rs117710327	5123	0.956	33235672	NR
19	33152331	33152530	19	33159134	33159134	*	0.0826409	0.0128821	19	33230549	0.05591	1	rs10414065	rs117710327	5123	0.956	33235672	NR
19	33152331	33152530	19	33159134	33159134	*	0.0826409	0.0128821	19	33230549	0.05591	1	rs10414065	rs117710327	5123	0.956	33235672	NR
19	33152331	33152530	19	33159134	33159134	*	0.0826409	0.0128821	19	33230549	0.05591	1	rs10414065	rs117710327	5123	0.956	33235672	SLC7A10,LRP3,TRT-AGT1-3,WDR88,CEBPA,CEBPA-AS1
19	33152331	33152530	19	33159134	33159134	*	0.0826409	0.0128821	19	33230549	0.05591	1	rs10414065	rs117710327	5123	0.956	33235672	SLC7A10
19	33152331	33152530	19	33159134	33159134	*	0.0826409	0.0128821	19	33230549	0.05591	1	rs10414065	rs117710327	5123	0.956	33235672	NR
19	33152331	33152530	19	33159134	33159134	*	0.0826409	0.0128821	19	33230549	0.05591	1	rs10414065	rs117710327	5123	0.956	33235672	NA
19	33152331	33152530	19	33159134	33159134	*	0.0826409	0.0128821	19	33230549	0.05591	1	rs10414065	rs117710327	5123	0.956	33235672	SLC7A10,CEBPA
19	33152331	33152530	19	33159134	33159134	*	0.0826409	0.0128821	19	33230549	0.05591	1	rs10414065	rs117710327	5123	0.956	33235672	NA
19	33152331	33152530	19	33159134	33159134	*	0.0826409	0.0128821	19	33230549	0.05591	1	rs10414065	rs117710327	5123	0.956	33235672	NA
19	33152331	33152530	19	33159134	33159134	*	0.0826409	0.0128821	19	33230549	0.05591	1	rs10414065	rs117710327	5123	0.956	33235672	NA
19	33152331	33152530	19	33159134	33159134	*	0.0826409	0.0128821	19	33230549	0.05591	1	rs10414065	rs117710327	5123	0.956	33235672	NA
19	33152331	33152530	19	33159134	33159134	*	0.0826409	0.0128821	19	33230549	0.05591	1	rs10414065	rs117710327	5123	0.956	33235672	NA
2	184468931	184469130	2	184473740	184473749	>s77460	0.0303423	0.012893	2	184562249	-0.02888	0.0293483	rs3953016	rs4371322	12	0.999	184562237	NA
17	82632095	82632153	17	82624687	82624687	*	0.0311847	0.0129172	17	82571590	-0.02508	1	rs146959082	rs7504089	44615	0.986	82526975	FOXK2
17	82632095	82632153	17	82624687	82624687	*	0.0311847	0.0129172	17	82571590	-0.02508	1	rs146959082	rs78461346	5282	1	82566308	NR
12	123274079	123274278	12	123276537	123277524	>s387351	0.0199874	0.012952	12	123285156	-0.007641	1	rs150489571	rs76582395	31770	0.963	123253386	C12orf65,RP11-282O18.3
14	102235598	102235797	14	102239437	102239437	>s810575	-0.0246297	0.0130228	14	102333887	-0.01832	1	rs3759559	rs72635188	14423	0.976	102319464	NR
12	117371393	117371592	12	117370042	117370042	*	0.0276769	0.0130796	12	117309785	-0.01752	1	rs73208120	rs73208120	0	1	117309785	NOS1
12	117371393	117371592	12	117370042	117370042	*	0.0276769	0.0130796	12	117309785	-0.01752	1	rs73208120	rs73208120	0	1	117309785	NOS1
12	117371393	117371592	12	117370042	117370042	*	0.0276769	0.0130796	12	117309785	-0.01752	1	rs73208120	rs73208120	0	1	117309785	NR
21	43531250	43531449	21	43535688	43535749	>s604357	0.0406597	0.0131176	21	43589338	-0.008606	1	rs1073522	rs2838338	66363	0.98	43655701	NR
21	43531250	43531449	21	43535688	43535749	>s604357	0.0406597	0.0131176	21	43589338	-0.008606	1	rs1073522	rs2838339	66531	0.98	43655869	NR
21	43531250	43531449	21	43535688	43535749	>s604357	0.0406597	0.0131176	21	43589338	-0.008606	1	rs1073522	rs2282526	71333	0.974	43660671	RRP1B
1	28244365	28244564	1	28247143	28247143	<s685478	-0.0208739	0.0131616	1	28247324	-0.02045	0.166698	rs492554	rs520800	36308	0.993	28211016	NR
1	28244365	28244564	1	28247143	28247143	<s685478	-0.0208739	0.0131616	1	28247324	-0.02045	0.166698	rs492554	rs520800	36308	0.993	28211016	DNAJC8
1	28244365	28244564	1	28247143	28247143	<s685478	-0.0208739	0.0131616	1	28247324	-0.02045	0.166698	rs492554	rs490633	35631	0.994	28211693	NR
1	197358181	197358380	1	197354824	197354827	>s40148	0.0660985	0.0132231	1	197372771	-0.04516	1	rs76169311	rs10922200	20461	0.98	197352310	NR
1	197358181	197358380	1	197354824	197354827	>s40148	0.0660985	0.0132231	1	197372771	-0.04516	1	rs76169311	rs17618450	4233	0.981	197368538	NR
1	197358181	197358380	1	197354824	197354827	>s40148	0.0660985	0.0132231	1	197372771	-0.04516	1	rs76169311	rs76169311	0	1	197372771	intergenic
1	197358181	197358380	1	197354824	197354827	>s40148	0.0660985	0.0132231	1	197372771	-0.04516	1	rs76169311	rs76169311	0	1	197372771	NA
22	42134090	42134104	22	42135058	42138066	<s775512	0.0746279	0.0132724	22	42059244	-0.03707	1	rs62238588	rs62238588	0	1	42059244	NR
22	42134090	42134104	22	42135058	42138066	<s775512	0.0746279	0.0132724	22	42059244	-0.03707	1	rs62238588	rs55715427	3579	0.998	42062823	NA
19	38734145	38734344	19	38739359	38739411	>s547436	0.0365456	0.0133809	19	38738449	0.03355	1	rs12983010	rs62121823	50608	0.986	38687841	NA
19	38734145	38734344	19	38739359	38739411	>s547436	0.0365456	0.0133809	19	38738449	0.03355	1	rs12983010	rs35941349	49810	0.987	38688639	NR
19	38734145	38734344	19	38739359	38739411	>s547436	0.0365456	0.0133809	19	38738449	0.03355	1	rs12983010	rs35941349	49810	0.987	38688639	NR
19	38734145	38734344	19	38739359	38739411	>s547436	0.0365456	0.0133809	19	38738449	0.03355	1	rs12983010	rs34105297	44420	0.957	38694029	NA
19	38734145	38734344	19	38739359	38739411	>s547436	0.0365456	0.0133809	19	38738449	0.03355	1	rs12983010	rs34105297	44420	0.957	38694029	ACTN4
14	100529199	100529398	14	100534189	100534280	>s443412	0.0483532	0.0134834	14	100454079	0.03564	1	rs78352137	rs78352137	0	1	100454079	NA
14	100529199	100529398	14	100534189	100534280	>s443412	0.0483532	0.0134834	14	100454079	0.03564	1	rs78352137	rs78352137	0	1	100454079	NA
22	29308789	29308988	22	29304105	29304105	*	0.0423951	0.0134882	22	29308893	0.03393	1	rs13055676	rs75337432	28627	0.995	29337521	NA
22	29308789	29308988	22	29304105	29304105	*	0.0423951	0.0134882	22	29308893	0.03393	1	rs13055676	rs34583478	30764	0.995	29339658	NA
22	29308789	29308988	22	29304105	29304105	*	0.0423951	0.0134882	22	29308893	0.03393	1	rs13055676	rs34583478	30764	0.995	29339658	AP1B1
6	95489760	95489959	6	95483774	95483857	>s182585	0.0535473	0.013658	6	95561622	0.04063	1	rs80268500	rs80268500	0	1	95561622	MANEA
17	41718553	41718752	17	41716904	41716904	*	0.0319511	0.0138182	17	41769461	-0.02622	1	rs41283425	rs41283425	0	1	41769461	NR
17	41718553	41718752	17	41716904	41716904	*	0.0319511	0.0138182	17	41769461	-0.02622	1	rs41283425	rs41283425	0	1	41769461	NA
17	41718553	41718752	17	41716904	41716904	*	0.0319511	0.0138182	17	41769461	-0.02622	1	rs41283425	rs41283425	0	1	41769461	NA
17	41718553	41718752	17	41716904	41716904	*	0.0319511	0.0138182	17	41769461	-0.02622	1	rs41283425	rs41283425	0	1	41769461	NR
16	71115472	71115671	16	71110474	71110476	>s1692246	-0.0673803	0.0141356	16	71189247	0.04106	1	rs34555683	rs8047583	21125	0.988	71210372	NR
6	131795256	131795455	6	131785461	131787645	>s185578	0.0478311	0.0143309	6	131728367	-0.03909	1	rs17185166	rs17185166	0	1	131728367	NR
5	155932145	155932344	5	155929297	155929374	>s167001	0.0480169	0.0144223	5	155863201	0.03734	1	rs9314082	rs9314082	0	1	155863201	SGCD
2	235764555	235764754	2	235764824	235764825	>s1436254	0.0138048	0.0144574	2	235785072	0.01356	0.438684	rs59832814	rs72977127	12045	0.998	235773027	AGAP1
20	2813532	2813731	20	2818677	2818734	>s553626	0.0785521	0.0146731	20	2820155	0.04454	1	rs7360412	rs7360412	0	1	2820155	TMEM239,C20orf141
15	24722130	24722329	15	24712505	24712571	*	0.042292	0.0150194	15	24682538	0.02919	1	rs11631213	rs36032407	4402	0.995	24678136	NR
11	62502349	62502548	11	62504576	62504576	*	0.0391867	0.0150499	11	62433010	-0.03052	1	rs145908530	rs145908530	0	1	62433010	NR
21	43478248	43478447	21	43469694	43469694	*	0.0464744	0.0152498	21	43572020	0.005422	1	rs2838319	rs7279968	85497	0.979	43657517	NR
19	46831361	46831560	19	46833484	46833484	*	0.0208803	0.015258	19	46894238	0.02062	1	rs17367673	rs73059314	84187	0.988	46978425	ARHGAP35
12	113299772	113299971	12	113300077	113300145	>s385918	0.022648	0.0154294	12	113299058	-0.01934	1	rs61932102	rs729062	49004	0.977	113250054	RPH3A,OAS1,OAS2,OAS3,DTX1,RASAL1,CCDC42B,DDX54,C12orf52,IQCD,SLC24A6,PLBD2,SDS,SDSL,LHX5
13	55362974	55363173	13	55367337	55367337	>s677616	0.0290681	0.0154496	13	55435759	0.02669	1	rs2860457	rs2860457	0	1	55435759	NA
19	4479952	4480151	19	4484915	4485045	>s533202	0.0321849	0.0158707	19	4386914	-0.03207	1	rs75177132	rs75177132	0	1	4386914	Intergenic
19	4479952	4480151	19	4484915	4485045	>s533202	0.0321849	0.0158707	19	4386914	-0.03207	1	rs75177132	rs75177132	0	1	4386914	NA
19	4479952	4480151	19	4484915	4485045	>s533202	0.0321849	0.0158707	19	4386914	-0.03207	1	rs75177132	rs75177132	0	1	4386914	Intergenic
19	4479952	4480151	19	4484915	4485045	>s533202	0.0321849	0.0158707	19	4386914	-0.03207	1	rs75177132	rs75177132	0	1	4386914	NR
20	53555779	53555978	20	53565784	53565951	>s573961	0.0317153	0.0160404	20	53486047	0.02459	1	rs73137973	rs7262233	1365	0.995	53484682	TSHZ2,LOC101927770,ZNF217,LOC105372672
1	15647672	15647871	1	15648014	15648014	*	0.0295606	0.0160888	1	15743433	-0.01692	1	rs74054849	rs74054849	0	1	15743433	RP11-169K16.4,TMEM82,SLC25A34,PLEKHM2,FBLIM1
2	111745638	111745643	2	111742980	111742987	>s70369	0.0227067	0.0162184	2	111650847	-0.01512	1	rs72823412	rs72823412	0	1	111650847	NR
2	111745638	111745643	2	111742980	111742987	>s70369	0.0227067	0.0162184	2	111650847	-0.01512	1	rs72823412	rs72823412	0	1	111650847	NR
15	84415614	84415798	15	84416451	84416546	<s699471>s470463<s699470>s470465>s1449626>s470501<s470517<s470516<s470515<s470514<s470513<s470512<s470511<s470510<s470509<s470508<s470507<s470506<s470505<s470504<s470503<s470502>s470518>s470519<s1530941>s470521<s1748781>s470523	-0.187638	0.0162317	15	84163898	-0.06558	1	rs11639244	rs12902973	273332	0.995	84562751	UBE2Q2P1
15	84415614	84415798	15	84416451	84416546	<s699471>s470463<s699470>s470465>s1449626>s470501<s470517<s470516<s470515<s470514<s470513<s470512<s470511<s470510<s470509<s470508<s470507<s470506<s470505<s470504<s470503<s470502>s470518>s470519<s1530941>s470521<s1748781>s470523	-0.187638	0.0162317	15	84163898	-0.06558	1	rs11639244	rs12902973	273332	0.995	84562751	NR
15	84415614	84415798	15	84416451	84416546	<s699471>s470463<s699470>s470465>s1449626>s470501<s470517<s470516<s470515<s470514<s470513<s470512<s470511<s470510<s470509<s470508<s470507<s470506<s470505<s470504<s470503<s470502>s470518>s470519<s1530941>s470521<s1748781>s470523	-0.187638	0.0162317	15	84163898	-0.06558	1	rs11639244	rs12905223	281618	0.992	84571037	NR
15	84415614	84415798	15	84416451	84416546	<s699471>s470463<s699470>s470465>s1449626>s470501<s470517<s470516<s470515<s470514<s470513<s470512<s470511<s470510<s470509<s470508<s470507<s470506<s470505<s470504<s470503<s470502>s470518>s470519<s1530941>s470521<s1748781>s470523	-0.187638	0.0162317	15	84163898	-0.06558	1	rs11639244	rs11633534	291992	0.973	84581411	NR
19	11131789	11131988	19	11129218	11129355	>s534960	0.0303249	0.0163864	19	11047379	-0.02535	1	rs4804564	rs4804564	0	1	11047379	NR
19	11131789	11131988	19	11129218	11129355	>s534960	0.0303249	0.0163864	19	11047379	-0.02535	1	rs4804564	rs4804564	0	1	11047379	NR
19	11131789	11131988	19	11129218	11129355	>s534960	0.0303249	0.0163864	19	11047379	-0.02535	1	rs4804564	rs4804564	0	1	11047379	NR
17	18380387	18380586	17	18373809	18373809	*	0.0425706	0.0164908	17	18384712	-0.01787	1	rs573550	rs34769815	2644	0.973	18387356	NR
20	2858154	2858353	20	2848754	2848826	>s553679	-0.0279156	0.016962	20	2803613	0.02586	1	rs74180375	rs74180375	0	1	2803613	NA
22	40539840	40540039	22	40537729	40537823	>s634462>s763595>s872296>s763597>s634463>s634464>s720209>s634466<s1016656>s634467>s634468<s841766>s634470>s838681>s872297>s634473>s634474>s634475>s634476>s872298	-0.0323782	0.0170475	22	40489495	-0.02935	1	rs73167082	rs73167082	0	1	40489495	TNRC6B
3	11486874	11487073	3	11487660	11487710	*	0.0252868	0.0170921	3	11404850	0.0243	0.545895	rs6791527	rs4684776	3101	0.994	11401749	ATG7
1	241680003	241680202	1	241674872	241674946	>s45298	0.0540365	0.0171658	1	241655192	-0.05035	1	rs12063498	rs12063498	0	1	241655192	WDR64
8	1391694	1391893	8	1389228	1389287	>s225287	0.0216244	0.0172041	8	1343123	0.01868	1	rs17754574	rs17754574	0	1	1343123	NR
6	129628992	129629191	6	129621567	129621567	*	0.040233	0.0172151	6	129698209	-0.03626	1	rs17057640	rs17057640	0	1	129698209	ARHGAP18
12	123583335	123583534	12	123581932	123581932	<s854329	-0.0460035	0.0172947	12	123529704	-0.0404	1	rs117209788	rs143928387	1031	1	123528673	RILPL1
12	123583335	123583534	12	123581932	123581932	<s854329	-0.0460035	0.0172947	12	123529704	-0.0404	1	rs117209788	rs143928387	1031	1	123528673	RILPL1
12	123583335	123583534	12	123581932	123581932	<s854329	-0.0460035	0.0172947	12	123529704	-0.0404	1	rs117209788	rs117209788	0	1	123529704	NR
12	123583335	123583534	12	123581932	123581932	<s854329	-0.0460035	0.0172947	12	123529704	-0.0404	1	rs117209788	rs117209788	0	1	123529704	RILPL1
12	123583335	123583534	12	123581932	123581932	<s854329	-0.0460035	0.0172947	12	123529704	-0.0404	1	rs117209788	rs117209788	0	1	123529704	RILPL1
12	123583335	123583534	12	123581932	123581932	<s854329	-0.0460035	0.0172947	12	123529704	-0.0404	1	rs117209788	rs117209788	0	1	123529704	NA
12	123583335	123583534	12	123581932	123581932	<s854329	-0.0460035	0.0172947	12	123529704	-0.0404	1	rs117209788	rs117209788	0	1	123529704	NA
12	123583335	123583534	12	123581932	123581932	<s854329	-0.0460035	0.0172947	12	123529704	-0.0404	1	rs117209788	rs117209788	0	1	123529704	NA
12	123583335	123583534	12	123581932	123581932	<s854329	-0.0460035	0.0172947	12	123529704	-0.0404	1	rs117209788	rs117209788	0	1	123529704	NA
12	123583335	123583534	12	123581932	123581932	<s854329	-0.0460035	0.0172947	12	123529704	-0.0404	1	rs117209788	rs10846527	29045	0.955	123558749	NR
11	69075482	69075681	11	69077246	69077307	>s362389>s362390<s804102>s362391>s362392>s362393>s362394>s362395>s362396>s1195034>s1195035>s1195037>s1195039<s1565555>s1195041>s1195042>s362398>s362399>s362404>s839961>s362405>s362406	-0.0313484	0.0174445	11	69055363	-0.02967	0.109996	rs72917389	rs35264875	23568	0.993	69078931	TPCN2
11	69075482	69075681	11	69077246	69077307	>s362389>s362390<s804102>s362391>s362392>s362393>s362394>s362395>s362396>s1195034>s1195035>s1195037>s1195039<s1565555>s1195041>s1195042>s362398>s362399>s362404>s839961>s362405>s362406	-0.0313484	0.0174445	11	69055363	-0.02967	0.109996	rs72917389	rs35264875	23568	0.993	69078931	TPCN2
11	69075482	69075681	11	69077246	69077307	>s362389>s362390<s804102>s362391>s362392>s362393>s362394>s362395>s362396>s1195034>s1195035>s1195037>s1195039<s1565555>s1195041>s1195042>s362398>s362399>s362404>s839961>s362405>s362406	-0.0313484	0.0174445	11	69055363	-0.02967	0.109996	rs72917389	rs35264875	23568	0.993	69078931	TPCN2
11	69075482	69075681	11	69077246	69077307	>s362389>s362390<s804102>s362391>s362392>s362393>s362394>s362395>s362396>s1195034>s1195035>s1195037>s1195039<s1565555>s1195041>s1195042>s362398>s362399>s362404>s839961>s362405>s362406	-0.0313484	0.0174445	11	69055363	-0.02967	0.109996	rs72917389	rs72930621	43914	0.95	69099277	BC064339
12	56512533	56512732	12	56515588	56515707	>s380736	0.0429969	0.0175738	12	56487830	-0.0246	1	rs117867773	rs117867773	0	1	56487830	NR
7	100691522	100691721	7	100694319	100694319	*	0.0276677	0.0175917	7	100600243	-0.01398	1	rs62482222	rs62482222	0	1	100600243	NA
10	97279511	97279596	10	97277649	97277649	*	0.0434333	0.0176411	10	97264397	-0.03261	0.0188306	rs796980	rs796980	0	1	97264397	NA
1	101545809	101546008	1	101553941	101553952	<s1137125	-0.053451	0.0176513	1	101570346	-0.04395	1	rs7545477	rs1484309	10912	0.995	101559434	NR
11	61978559	61978758	11	61974783	61974783	<s745182	0.0928521	0.0176812	11	61944659	0.07359	1	rs2727261	rs2727261	0	1	61944659	FTH1,BEST1
11	61978559	61978758	11	61974783	61974783	<s745182	0.0928521	0.0176812	11	61944659	0.07359	1	rs2727261	rs2727261	0	1	61944659	NA
11	61978559	61978758	11	61974783	61974783	<s745182	0.0928521	0.0176812	11	61944659	0.07359	1	rs2727261	rs2727261	0	1	61944659	NA
11	61978559	61978758	11	61974783	61974783	<s745182	0.0928521	0.0176812	11	61944659	0.07359	1	rs2727261	rs2727261	0	1	61944659	NA
11	61978559	61978758	11	61974783	61974783	<s745182	0.0928521	0.0176812	11	61944659	0.07359	1	rs2727261	rs2727261	0	1	61944659	NA
11	61978559	61978758	11	61974783	61974783	<s745182	0.0928521	0.0176812	11	61944659	0.07359	1	rs2727261	rs2727260	111	0.992	61944770	FADS2
7	128846674	128846873	7	128840154	128840154	*	0.0257706	0.0178162	7	128776990	0.01401	1	rs55985730	rs55985730	0	1	128776990	OPN1SW
7	128846674	128846873	7	128840154	128840154	*	0.0257706	0.0178162	7	128776990	0.01401	1	rs55985730	rs55985730	0	1	128776990	OPN1SW,CALU
11	125221504	125221703	11	125205501	125215741	>s368256	0.0232785	0.0180034	11	125302697	0.01721	0.55868	rs750338	rs750338	0	1	125302697	PKNOX2
11	125221504	125221703	11	125205501	125215741	>s368256	0.0232785	0.0180034	11	125302697	0.01721	0.55868	rs750338	rs750338	0	1	125302697	PKNOX2
16	11957282	11957481	16	11957696	11957696	*	0.021245	0.0180039	16	11971954	-0.0162	1	rs112518094	rs2071336	4137	1	11967817	TNFRSF17,LOC729978,SNX29
11	125494306	125494505	11	125498394	125498446	>s368278<s1101591	0.0383763	0.018051	11	125573240	0.02964	1	rs74986931	rs76118307	134	0.992	125573106	NA
20	60298121	60298320	20	60303041	60303060	*	0.0567681	0.0182596	20	60308816	0.05326	1	rs56363609	rs56363609	0	1	60308816	NA
19	417920	418119	19	423112	423660	>s530916>s530917>s530918>s530919>s530920>s530921>s530922>s710251>s710252>s710253>s530923>s530924>s530925>s530926	-0.0608022	0.018261	19	401714	0.04995	0.299428	rs7508251	rs7508251	0	1	401714	NR
13	29463603	29463662	13	29457436	29457436	*	0.0319406	0.0186316	13	29447792	-0.02624	1	rs79123680	rs4379923	464	0.964	29447328	NR
11	66908911	66909110	11	66903792	66903810	>s361983	0.0334783	0.0186339	11	66901092	-0.02623	1	rs76732061	rs56803995	850	0.989	66900242	NR
9	133207216	133207415	9	133213795	133213878	>s316733	0.0336919	0.0187838	9	133252094	0.02489	1	rs13291798	rs13291798	0	1	133252094	RP11-430N14.4,ABO
9	133207216	133207415	9	133213795	133213878	>s316733	0.0336919	0.0187838	9	133252094	0.02489	1	rs13291798	rs13291798	0	1	133252094	RP11-430N14.4,ABO
9	133207216	133207415	9	133213795	133213878	>s316733	0.0336919	0.0187838	9	133252094	0.02489	1	rs13291798	rs13291798	0	1	133252094	ABO
9	34661670	34661869	9	34655677	34655883	>s247543	0.0381693	0.0190786	9	34699703	-0.01457	1	rs72737176	rs2233873	8165	0.952	34691538	NA
12	50149509	50149708	12	50156438	50156438	*	0.0261364	0.0191281	12	50145636	-0.02212	1	rs7138945	rs7964698	32240	0.97	50113396	NA
12	50149509	50149708	12	50156438	50156438	*	0.0261364	0.0191281	12	50145636	-0.02212	1	rs7138945	rs10783340	19709	0.993	50165345	NR
3	183704120	183704319	3	183712208	183712214	>s109801	0.0493846	0.0192484	3	183665522	0.03272	1	rs151044295	rs151044295	0	1	183665522	NR
3	183704120	183704319	3	183712208	183712214	>s109801	0.0493846	0.0192484	3	183665522	0.03272	1	rs151044295	rs151044295	0	1	183665522	NR
3	183704120	183704319	3	183712208	183712214	>s109801	0.0493846	0.0192484	3	183665522	0.03272	1	rs151044295	rs151044295	0	1	183665522	NR
1	219071402	219071601	1	219073311	219073311	>s760312	0.0433909	0.0192679	1	219049508	0.04237	1	rs73111535	rs73103335	111822	0.978	218937686	LYPLAL1-AS1
1	219071402	219071601	1	219073311	219073311	>s760312	0.0433909	0.0192679	1	219049508	0.04237	1	rs73111535	rs618205	100457	0.966	218949051	NR
1	219071402	219071601	1	219073311	219073311	>s760312	0.0433909	0.0192679	1	219049508	0.04237	1	rs73111535	rs596169	75431	0.967	218974077	MIR548F3
1	219071402	219071601	1	219073311	219073311	>s760312	0.0433909	0.0192679	1	219049508	0.04237	1	rs73111535	rs1700874	39992	0.977	219009516	MIR548F3
1	219071402	219071601	1	219073311	219073311	>s760312	0.0433909	0.0192679	1	219049508	0.04237	1	rs73111535	rs6667536	7713	0.997	219041795	LYPLAL1-DT
1	219071402	219071601	1	219073311	219073311	>s760312	0.0433909	0.0192679	1	219049508	0.04237	1	rs73111535	rs73111535	0	1	219049508	MIR548F3
1	219071402	219071601	1	219073311	219073311	>s760312	0.0433909	0.0192679	1	219049508	0.04237	1	rs73111535	rs73111535	0	1	219049508	LYPLAL1-AS1
1	219071402	219071601	1	219073311	219073311	>s760312	0.0433909	0.0192679	1	219049508	0.04237	1	rs73111535	rs73111535	0	1	219049508	LOC643723
1	219071402	219071601	1	219073311	219073311	>s760312	0.0433909	0.0192679	1	219049508	0.04237	1	rs73111535	rs73111535	0	1	219049508	LOC643723
1	219071402	219071601	1	219073311	219073311	>s760312	0.0433909	0.0192679	1	219049508	0.04237	1	rs73111535	rs73111535	0	1	219049508	NR
6	15142426	15142625	6	15147107	15147107	*	0.0337991	0.0193802	6	15232632	0.03062	0.337813	rs111447679	rs112266013	2120	0.998	15230512	NA
6	15142426	15142625	6	15147107	15147107	*	0.0337991	0.0193802	6	15232632	0.03062	0.337813	rs111447679	rs112575696	1924	0.997	15234556	NR
11	117016160	117016359	11	117010051	117010724	>s367311	0.0200165	0.0195046	11	117070824	-0.01369	1	rs9971421	rs78692246	150233	0.981	116920591	NA
11	117016160	117016359	11	117010051	117010724	>s367311	0.0200165	0.0195046	11	117070824	-0.01369	1	rs9971421	rs78692246	150233	0.981	116920591	NA
11	117016160	117016359	11	117010051	117010724	>s367311	0.0200165	0.0195046	11	117070824	-0.01369	1	rs9971421	rs77204473	136476	0.985	116934348	SIK3
11	117016160	117016359	11	117010051	117010724	>s367311	0.0200165	0.0195046	11	117070824	-0.01369	1	rs9971421	rs77204473	136476	0.985	116934348	SIK3
11	117016160	117016359	11	117010051	117010724	>s367311	0.0200165	0.0195046	11	117070824	-0.01369	1	rs9971421	rs11216199	110524	0.986	116960300	NR
11	117016160	117016359	11	117010051	117010724	>s367311	0.0200165	0.0195046	11	117070824	-0.01369	1	rs9971421	rs56751865	4669	0.999	117066155	NR
11	117016160	117016359	11	117010051	117010724	>s367311	0.0200165	0.0195046	11	117070824	-0.01369	1	rs9971421	rs76942203	31707	0.989	117102531	NA
11	117016160	117016359	11	117010051	117010724	>s367311	0.0200165	0.0195046	11	117070824	-0.01369	1	rs9971421	rs12416941	37823	0.966	117108647	NR
17	38900516	38900715	17	38899136	38899224	>s506400	0.0572486	0.0195102	17	38977399	0.03401	1	rs62075221	rs9906595	32272	0.972	38945127	FBXO47
22	41443964	41444163	22	41452798	41452798	*	0.02374	0.0197072	22	41386115	0.02174	0.573845	rs73176686	rs5758324	5831	0.982	41391946	TEF
22	41443964	41444163	22	41452798	41452798	*	0.02374	0.0197072	22	41386115	0.02174	0.573845	rs73176686	rs132901	15428	0.997	41401543	NA
10	15760197	15760396	10	15742774	15760447	>s323828>s323829>s323830>s323831>s323832	0.0462022	0.0197193	10	15692263	0.03447	1	rs77508821	rs117273305	37642	0.955	15729905	NA
15	28350245	28350444	15	28351132	28351277	<s1133210	0.0384481	0.0197303	15	28293470	0.01301	1	rs12438302	rs7402990	154125	0.986	28139345	NA
15	28350245	28350444	15	28351132	28351277	<s1133210	0.0384481	0.0197303	15	28293470	0.01301	1	rs12438302	rs7402990	154125	0.986	28139345	NA
15	28350245	28350444	15	28351132	28351277	<s1133210	0.0384481	0.0197303	15	28293470	0.01301	1	rs12438302	rs7402990	154125	0.986	28139345	NA
15	28350245	28350444	15	28351132	28351277	<s1133210	0.0384481	0.0197303	15	28293470	0.01301	1	rs12438302	rs7402990	154125	0.986	28139345	NA
15	28350245	28350444	15	28351132	28351277	<s1133210	0.0384481	0.0197303	15	28293470	0.01301	1	rs12438302	rs72714143	101555	0.991	28191915	NR
15	28350245	28350444	15	28351132	28351277	<s1133210	0.0384481	0.0197303	15	28293470	0.01301	1	rs12438302	rs72714143	101555	0.991	28191915	OCA2
15	28350245	28350444	15	28351132	28351277	<s1133210	0.0384481	0.0197303	15	28293470	0.01301	1	rs12438302	rs76704029	7557	0.999	28301027	HERC2
15	28350245	28350444	15	28351132	28351277	<s1133210	0.0384481	0.0197303	15	28293470	0.01301	1	rs12438302	rs77572354	22106	0.997	28315576	HERC2
12	50585149	50585348	12	50580538	50581733	>s380113	0.0708448	0.0200301	12	50582510	-0.06737	1	rs7295814	rs17291650	237140	0.954	50819650	ATF1
2	218850398	218850597	2	218850698	218850698	*	0.050478	0.0200725	2	218919534	0.04546	1	rs188488867	rs77157375	4345	0.995	218915189	LINC01494
2	218850398	218850597	2	218850698	218850698	*	0.050478	0.0200725	2	218919534	0.04546	1	rs188488867	rs77157375	4345	0.995	218915189	NR
2	218850398	218850597	2	218850698	218850698	*	0.050478	0.0200725	2	218919534	0.04546	1	rs188488867	rs188488867	0	1	218919534	LINC01494
20	25344295	25344494	20	25347409	25347409	*	0.0554295	0.0203393	20	25411257	-0.03744	1	rs73107482	rs73107469	17670	0.999	25393587	NR
10	100321767	100321791	10	100322626	100322681	>s342513	0.0605279	0.0203649	10	100225448	0.04811	1	rs17885529	rs28372851	39172	0.994	100186276	ERLIN1
10	100321767	100321791	10	100322626	100322681	>s342513	0.0605279	0.0203649	10	100225448	0.04811	1	rs17885529	rs34997499	16903	0.978	100242351	NR
10	100321767	100321791	10	100322626	100322681	>s342513	0.0605279	0.0203649	10	100225448	0.04811	1	rs17885529	rs12765052	63774	0.995	100289222	PKD2L1
16	89069781	89069980	16	89078342	89078342	*	0.0495913	0.0204596	16	88977046	-0.04843	1	rs117565673	rs117565673	0	1	88977046	CBFA2T3
16	89069781	89069980	16	89078342	89078342	*	0.0495913	0.0204596	16	88977046	-0.04843	1	rs117565673	rs117565673	0	1	88977046	NA
16	89069781	89069980	16	89078342	89078342	*	0.0495913	0.0204596	16	88977046	-0.04843	1	rs117565673	rs117565673	0	1	88977046	CBFA2T3
16	89069781	89069980	16	89078342	89078342	*	0.0495913	0.0204596	16	88977046	-0.04843	1	rs117565673	rs117565673	0	1	88977046	CBFA2T3
16	89069781	89069980	16	89078342	89078342	*	0.0495913	0.0204596	16	88977046	-0.04843	1	rs117565673	rs117565673	0	1	88977046	CBFA2T3
16	89069781	89069980	16	89078342	89078342	*	0.0495913	0.0204596	16	88977046	-0.04843	1	rs117565673	rs117565673	0	1	88977046	CBFA2T3
16	89069781	89069980	16	89078342	89078342	*	0.0495913	0.0204596	16	88977046	-0.04843	1	rs117565673	rs117565673	0	1	88977046	CBFA2T3
19	45067887	45068086	19	45070831	45070918	>s548577	-0.0198303	0.0206025	19	45013623	-0.01392	1	rs34874378	rs34874378	0	1	45013623	NR
19	45067887	45068086	19	45070831	45070918	>s548577	-0.0198303	0.0206025	19	45013623	-0.01392	1	rs34874378	rs34874378	0	1	45013623	RELB
19	45067887	45068086	19	45070831	45070918	>s548577	-0.0198303	0.0206025	19	45013623	-0.01392	1	rs34874378	rs34874378	0	1	45013623	NR
16	90018631	90018830	16	90023591	90023959	>s998312	-0.0311458	0.0207099	16	90034097	-0.02742	1	rs79418450	rs77270200	7430	0.98	90026667	NA
16	90018631	90018830	16	90023591	90023959	>s998312	-0.0311458	0.0207099	16	90034097	-0.02742	1	rs79418450	rs77270200	7430	0.98	90026667	NA
16	90018631	90018830	16	90023591	90023959	>s998312	-0.0311458	0.0207099	16	90034097	-0.02742	1	rs79418450	rs77270200	7430	0.98	90026667	NA
16	90018631	90018830	16	90023591	90023959	>s998312	-0.0311458	0.0207099	16	90034097	-0.02742	1	rs79418450	rs74583214	10293	0.977	90044390	NR
4	72762839	72763038	4	72763601	72766107	>s128340	0.0301134	0.0209201	4	72683842	0.02848	1	rs58083390	rs58083390	0	1	72683842	NR
4	72762839	72763038	4	72763601	72766107	>s128340	0.0301134	0.0209201	4	72683842	0.02848	1	rs58083390	rs58083390	0	1	72683842	intergenic
4	72762839	72763038	4	72763601	72766107	>s128340	0.0301134	0.0209201	4	72683842	0.02848	1	rs58083390	rs58083390	0	1	72683842	ADAMTS3
3	50135678	50135877	3	50137402	50137470	>s90804	0.0286787	0.0212844	3	50152098	0.01392	1	rs73080977	rs73080977	0	1	50152098	NR
3	50135678	50135877	3	50137402	50137470	>s90804	0.0286787	0.0212844	3	50152098	0.01392	1	rs73080977	rs73080977	0	1	50152098	NR
3	50135678	50135877	3	50137402	50137470	>s90804	0.0286787	0.0212844	3	50152098	0.01392	1	rs73080977	rs73080977	0	1	50152098	NR
11	117011190	117011389	11	117010051	117010724	>s367311	0.0373752	0.0213218	11	116928247	0.01538	1	rs579890	rs2000614	116779	0.971	117045026	NR
11	117011190	117011389	11	117010051	117010724	>s367311	0.0373752	0.0213218	11	116928247	0.01538	1	rs579890	rs10750100	118281	0.969	117046528	NA
11	117011190	117011389	11	117010051	117010724	>s367311	0.0373752	0.0213218	11	116928247	0.01538	1	rs579890	rs1815787	122434	0.971	117050681	NR
11	117011190	117011389	11	117010051	117010724	>s367311	0.0373752	0.0213218	11	116928247	0.01538	1	rs579890	rs1815787	122434	0.971	117050681	NA
17	63772708	63772907	17	63763611	63763727	>s509172	-0.0394391	0.0214556	17	63753401	0.03569	1	rs75646162	rs78369934	91660	0.975	63661741	MAP3K3
1	26286748	26286947	1	26282404	26282405	>s723212	0.0439822	0.0214942	1	26270027	0.03115	1	rs4060115	rs10794527	23471	0.952	26293498	AIM1L
1	26286748	26286947	1	26282404	26282405	>s723212	0.0439822	0.0214942	1	26270027	0.03115	1	rs4060115	rs4291487	30765	0.989	26300792	NA
6	160158810	160159009	6	160152666	160152681	>s189109	0.0284427	0.0215612	6	160098196	0.02618	1	rs78423775	rs78423775	0	1	160098196	NR
6	160158810	160159009	6	160152666	160152681	>s189109	0.0284427	0.0215612	6	160098196	0.02618	1	rs78423775	rs78423775	0	1	160098196	NR
6	160158810	160159009	6	160152666	160152681	>s189109	0.0284427	0.0215612	6	160098196	0.02618	1	rs78423775	rs78423775	0	1	160098196	NR
6	160158810	160159009	6	160152666	160152681	>s189109	0.0284427	0.0215612	6	160098196	0.02618	1	rs78423775	rs78423775	0	1	160098196	NR
6	152607094	152607293	6	152603857	152603861	>s187402	-0.0299985	0.0215618	6	152684248	0.01868	1	rs7753119	rs76794875	6781	0.99	152691029	NA
17	16881912	16882111	17	16874438	16874547	>s498013	-0.0329541	0.0215948	17	16956740	-0.02395	1	rs113436029	rs113436029	0	1	16956740	NR
17	16881912	16882111	17	16874438	16874547	>s498013	-0.0329541	0.0215948	17	16956740	-0.02395	1	rs113436029	rs113436029	0	1	16956740	NR
5	142355878	142356077	5	142351820	142352069	>s165728>s165729>s165730>s165735<s1259035>s165737<s905144>s165738	0.0532073	0.0216269	5	142390010	0.03559	1	rs254430	rs254431	200	1	142389810	AC005592.2
5	142355878	142356077	5	142351820	142352069	>s165728>s165729>s165730>s165735<s1259035>s165737<s905144>s165738	0.0532073	0.0216269	5	142390010	0.03559	1	rs254430	rs254431	200	1	142389810	AC005592.2
5	142355878	142356077	5	142351820	142352069	>s165728>s165729>s165730>s165735<s1259035>s165737<s905144>s165738	0.0532073	0.0216269	5	142390010	0.03559	1	rs254430	rs254426	3328	0.961	142393338	AC005592.2
5	142355878	142356077	5	142351820	142352069	>s165728>s165729>s165730>s165735<s1259035>s165737<s905144>s165738	0.0532073	0.0216269	5	142390010	0.03559	1	rs254430	rs254426	3328	0.961	142393338	AC005592.2
16	85846368	85846567	16	85852081	85852110	>s490587	0.0300241	0.0216495	16	85893089	0.0149	1	rs12922615	rs12922615	0	1	85893089	NA
16	85846368	85846567	16	85852081	85852110	>s490587	0.0300241	0.0216495	16	85893089	0.0149	1	rs12922615	rs12149363	2010	0.96	85895099	NR
1	9526864	9527063	1	9516791	9519635	>s5593	0.0537915	0.0218091	1	9433760	-0.04683	1	rs12074517	rs12074324	529	0.991	9433231	NA
2	730736	730935	2	732856	732939	>s47960>s47961>s47962<s747789<s834302>s47965>s47966>s47967>s47968>s47969>s47970>s47971>s47972>s47973>s47974>s47975>s47976>s47977>s668184>s700343>s668185>s668186>s47978>s47979>s700344>s47980>s47981	-0.0505146	0.021843	2	677591	0.04803	1	rs11893030	rs11893030	0	1	677591	NR
18	6682236	6682435	18	6679162	6679186	>s714333>s714334>s514962	0.0403881	0.0218464	18	6714323	0.02849	1	rs12604284	rs12964207	22769	0.984	6737092	NA
3	93726211	93726410	3	93733935	93733949	>s101429>s101430>s101431	0.0284182	0.0219101	3	93799185	0.01704	1	rs9713501	rs9713501	0	1	93799185	NR
17	7200091	7200290	17	7191227	7191227	*	0.0395696	0.0220009	17	7162055	-0.02995	1	rs12103655	rs4796373	650	0.997	7162705	NR
15	45462144	45462229	15	45462234	45462234	*	0.041325	0.0220477	15	45448014	-0.01593	1	rs9806724	rs9806724	0	1	45448014	NR
15	45462144	45462229	15	45462234	45462234	*	0.041325	0.0220477	15	45448014	-0.01593	1	rs9806724	rs9806724	0	1	45448014	NR
4	44941397	44941596	4	44950531	44950605	>s121249	0.037604	0.0220679	4	44846148	-0.0279	1	rs11932963	rs77132247	30359	0.986	44815789	Intergenic
8	143663100	143663299	8	143668191	143668289	>s243132	0.0206407	0.0223487	8	143582517	-0.01645	1	rs34178175	rs3793371	388	0.999	143582129	NR
12	123905274	123905473	12	123914907	123914907	*	0.034741	0.0223521	12	123895500	0.01981	1	rs76355371	rs76355371	0	1	123895500	NR
12	123905274	123905473	12	123914907	123914907	*	0.034741	0.0223521	12	123895500	0.01981	1	rs76355371	rs76355371	0	1	123895500	NR
12	123905274	123905473	12	123914907	123914907	*	0.034741	0.0223521	12	123895500	0.01981	1	rs76355371	rs76355371	0	1	123895500	NR
12	123905274	123905473	12	123914907	123914907	*	0.034741	0.0223521	12	123895500	0.01981	1	rs76355371	rs76355371	0	1	123895500	DNAH10
12	123905274	123905473	12	123914907	123914907	*	0.034741	0.0223521	12	123895500	0.01981	1	rs76355371	rs76355371	0	1	123895500	DNAH10
12	123905274	123905473	12	123914907	123914907	*	0.034741	0.0223521	12	123895500	0.01981	1	rs76355371	rs76355371	0	1	123895500	DNAH10
12	123905274	123905473	12	123914907	123914907	*	0.034741	0.0223521	12	123895500	0.01981	1	rs76355371	rs76355371	0	1	123895500	DNAH10
12	123905274	123905473	12	123914907	123914907	*	0.034741	0.0223521	12	123895500	0.01981	1	rs76355371	rs76355371	0	1	123895500	DNAH10
11	64508284	64508483	11	64514801	64514853	>s361616	0.040542	0.0224008	11	64550875	0.03103	1	rs12795471	rs12795471	0	1	64550875	NR
11	64508284	64508483	11	64514801	64514853	>s361616	0.040542	0.0224008	11	64550875	0.03103	1	rs12795471	rs12795471	0	1	64550875	SLC22A11
11	64508284	64508483	11	64514801	64514853	>s361616	0.040542	0.0224008	11	64550875	0.03103	1	rs12795471	rs12795471	0	1	64550875	SLC22A11
3	49281708	49281907	3	49275218	49275218	*	0.0270569	0.0225532	3	49332514	0.02137	1	rs114561213	rs150252215	73713	0.999	49258801	NA
9	33981811	33982010	9	33990358	33990563	>s247472	0.0701544	0.022628	9	33956352	0.02701	1	rs11788269	rs307646	24012	0.989	33932340	NR
13	27990411	27990610	13	27999082	27999088	>s407318>s407319>s407320>s407321>s407322>s407324>s407326>s1005185>s407327>s407328	0.0436182	0.0226794	13	27927461	-0.02245	1	rs11620388	rs11620388	0	1	27927461	NR
19	19872865	19873064	19	19867859	19873975	>s536556<s1022129>s536557	-0.046175	0.0228113	19	19948684	-0.03924	1	rs10405744	rs10405744	0	1	19948684	intergenic
14	20787501	20787700	14	20785966	20787005	>s435550	-0.0183824	0.0228219	14	20820680	-0.01638	1	rs72678358	rs56216219	1616	0.951	20819064	NR
14	20787501	20787700	14	20785966	20787005	>s435550	-0.0183824	0.0228219	14	20820680	-0.01638	1	rs72678358	rs56216219	1616	0.951	20819064	NA
1	58242767	58242966	1	58241308	58241361	>s12017	-0.030654	0.0228764	1	58298660	-0.02034	1	rs4912320	rs527409	6417	0.998	58292243	DAB1
19	55163341	55163540	19	55155930	55155930	>s997945>s997947	-0.0155659	0.0230556	19	55183850	-0.01367	1	rs78783502	rs45607834	1932	0.997	55181918	NA
19	55163341	55163540	19	55155930	55155930	>s997945>s997947	-0.0155659	0.0230556	19	55183850	-0.01367	1	rs78783502	rs45607834	1932	0.997	55181918	NA
11	1692861	1693060	11	1694904	1694904	*	0.0295988	0.0231148	11	1625702	-0.02545	1	rs77837402	rs12419284	2492	0.973	1623210	NR
1	65891544	65891743	1	65882707	65883745	>s12649	0.0349151	0.023296	1	65842265	-0.01803	1	rs10218482	rs10493389	2917	0.996	65845182	PDE4B
2	123320885	123321084	2	123321083	123321177	>s71844	0.0304606	0.0233573	2	123254904	-0.02542	1	rs13003552	rs1519277	6319	0.97	123261223	intergenic
17	48003587	48003786	17	48010830	48010831	>s507681	0.0365118	0.0233763	17	48046964	-0.01999	1	rs9900074	rs11656818	21089	0.975	48025871	NR
17	48003587	48003786	17	48010830	48010831	>s507681	0.0365118	0.0233763	17	48046964	-0.01999	1	rs9900074	rs11656818	21089	0.975	48025871	NR
17	48003587	48003786	17	48010830	48010831	>s507681	0.0365118	0.0233763	17	48046964	-0.01999	1	rs9900074	rs9900074	0	1	48046964	NR
17	48003587	48003786	17	48010830	48010831	>s507681	0.0365118	0.0233763	17	48046964	-0.01999	1	rs9900074	rs16969990	106565	0.976	48153529	NA
17	48003587	48003786	17	48010830	48010831	>s507681	0.0365118	0.0233763	17	48046964	-0.01999	1	rs9900074	rs16969990	106565	0.976	48153529	SKAP1
17	48003587	48003786	17	48010830	48010831	>s507681	0.0365118	0.0233763	17	48046964	-0.01999	1	rs9900074	rs11650182	148283	0.97	48195247	NR
10	94743871	94744070	10	94748334	94748439	>s341850	0.0338907	0.0235287	10	94732916	-0.02864	1	rs61886201	rs61886201	0	1	94732916	NR
10	94743871	94744070	10	94748334	94748439	>s341850	0.0338907	0.0235287	10	94732916	-0.02864	1	rs61886201	rs61886764	179401	0.964	94912317	NR
5	128403567	128403766	5	128413399	128413489	>s164650	0.0413046	0.0236598	5	128500593	0.03217	1	rs112387807	rs892864	427	0.999	128500166	FBN2
19	10541337	10541536	19	10539659	10539738	>s534896	0.0642737	0.0236624	19	10445368	0.05303	1	rs78854124	rs78854124	0	1	10445368	NR
17	82005841	82006040	17	81997147	81997147	>s777004	-0.0462189	0.0237542	17	81956484	-0.02966	1	rs113956329	rs9899719	14777	0.971	81971261	NA
12	2255996	2256047	12	2255879	2255973	>s370886	0.0300967	0.0239296	12	2275191	-0.02735	1	rs79426448	rs11609729	40806	0.978	2234385	CACNA1C
13	21728610	21728809	13	21726061	21726061	*	0.0353808	0.0240393	13	21751804	0.02096	1	rs12583358	rs12583553	6879	1	21758683	FGF9
1	2977582	2977781	1	2986336	2986336	*	0.0382705	0.0240797	1	3020986	0.02648	1	rs12033927	rs72630911	36514	0.952	3057500	NR
3	98933200	98933274	3	98933200	98934829	>s102070	0.0314394	0.0240904	3	98978698	-0.02817	1	rs28528154	rs72934623	187837	0.959	98790861	ST3GAL6
3	98933200	98933274	3	98933200	98934829	>s102070	0.0314394	0.0240904	3	98978698	-0.02817	1	rs28528154	rs3796133	179699	0.96	98798999	NR
3	98933200	98933274	3	98933200	98934829	>s102070	0.0314394	0.0240904	3	98978698	-0.02817	1	rs28528154	rs3796133	179699	0.96	98798999	NR
3	98933200	98933274	3	98933200	98934829	>s102070	0.0314394	0.0240904	3	98978698	-0.02817	1	rs28528154	rs79590991	157973	0.965	98820725	NA
3	98933200	98933274	3	98933200	98934829	>s102070	0.0314394	0.0240904	3	98978698	-0.02817	1	rs28528154	rs9289696	21021	0.951	98957677	NA
3	98933200	98933274	3	98933200	98934829	>s102070	0.0314394	0.0240904	3	98978698	-0.02817	1	rs28528154	rs9859042	20156	0.951	98958542	NR
3	98933200	98933274	3	98933200	98934829	>s102070	0.0314394	0.0240904	3	98978698	-0.02817	1	rs28528154	rs9859042	20156	0.951	98958542	NR
3	98933200	98933274	3	98933200	98934829	>s102070	0.0314394	0.0240904	3	98978698	-0.02817	1	rs28528154	rs9864010	19369	0.951	98959329	DCBLD2
15	28351045	28351244	15	28351132	28351277	<s1133210	0.0598751	0.0241286	15	28251049	0.01127	1	rs6497292	rs75165924	115937	0.969	28135112	HERC2
15	28351045	28351244	15	28351132	28351277	<s1133210	0.0598751	0.0241286	15	28251049	0.01127	1	rs6497292	rs8028689	7307	0.997	28243742	NR
15	28351045	28351244	15	28351132	28351277	<s1133210	0.0598751	0.0241286	15	28251049	0.01127	1	rs6497292	rs79097182	15802	0.992	28266851	HERC2
15	28351045	28351244	15	28351132	28351277	<s1133210	0.0598751	0.0241286	15	28251049	0.01127	1	rs6497292	rs79097182	15802	0.992	28266851	HERC2
15	28351045	28351244	15	28351132	28351277	<s1133210	0.0598751	0.0241286	15	28251049	0.01127	1	rs6497292	rs79097182	15802	0.992	28266851	HERC2
18	22040312	22040511	18	22045219	22048453	>s521958	0.0448161	0.024207	18	21968938	-0.02962	1	rs28582130	rs12957049	22297	0.989	21946641	NR
2	728936	729135	2	726033	726033	*	-0.0319558	0.0243144	2	658550	0.02096	1	rs2867121	rs2867121	0	1	658550	TMEM18
1	150889908	150890107	1	150888220	150890337	>s35886	-0.0554133	0.0243266	1	150849692	-0.041	1	rs114845445	rs144984465	185177	0.976	150664515	GOLPH3L
2	38662708	38662907	2	38666167	38666255	>s54411	0.0478666	0.0243523	2	38679357	-0.03527	1	rs1465655	rs1465655	0	1	38679357	NR
9	127808781	127808980	9	127800887	127800887	*	-0.0431956	0.0244813	9	127849939	-0.0228	1	rs12379490	rs12156525	447	1	127850386	NR
7	6811405	6811604	7	6818711	6818723	<s856120	0.0325934	0.0246929	7	6734504	0.01933	1	rs60111824	rs60111824	0	1	6734504	NR
17	44297112	44297311	17	44300393	44306228	>s507195>s507196>s507197	0.0466099	0.0247715	17	44258317	-0.04084	0.648412	rs13306775	rs13306775	0	1	44258317	Intergenic
17	44297112	44297311	17	44300393	44306228	>s507195>s507196>s507197	0.0466099	0.0247715	17	44258317	-0.04084	0.648412	rs13306775	rs13306775	0	1	44258317	SLC4A1,AC003043.1
17	44297112	44297311	17	44300393	44306228	>s507195>s507196>s507197	0.0466099	0.0247715	17	44258317	-0.04084	0.648412	rs13306775	rs13306775	0	1	44258317	SLC4A1,AC003043.1
17	44297112	44297311	17	44300393	44306228	>s507195>s507196>s507197	0.0466099	0.0247715	17	44258317	-0.04084	0.648412	rs13306775	rs13306775	0	1	44258317	SLC4A1,AC003043.1
17	44297112	44297311	17	44300393	44306228	>s507195>s507196>s507197	0.0466099	0.0247715	17	44258317	-0.04084	0.648412	rs13306775	rs13306775	0	1	44258317	SLC4A1,AC003043.1
17	44297112	44297311	17	44300393	44306228	>s507195>s507196>s507197	0.0466099	0.0247715	17	44258317	-0.04084	0.648412	rs13306775	rs13306775	0	1	44258317	SLC4A1,AC003043.1
6	56900383	56900582	6	56896158	56896158	*	0.0152379	0.0249013	6	56933643	-0.01348	1	rs71564868	rs9475752	17700	0.968	56915943	DST,BEND6
5	28591262	28591461	5	28596955	28597069	>s147823>s147824>s147825	0.0379097	0.024908	5	28689260	0.02134	1	rs6886735	rs16897978	7137	0.992	28696397	NR
1	26709452	26709651	1	26708266	26708543	>s8298	0.0364494	0.0250105	1	26677897	-0.02368	1	rs71640337	rs34217609	3879	0.981	26681776	NA
10	75468941	75469140	10	75469298	75469298	>s733832	0.0345237	0.0250726	10	75476920	0.03294	0.613253	rs9416060	rs3012060	7658	0.963	75484578	NR
10	25992539	25992738	10	26002668	26002668	*	0.0492022	0.0251876	10	25935994	0.03718	1	rs72789911	rs946688	1995	0.997	25937989	NA
10	25992539	25992738	10	26002668	26002668	*	0.0492022	0.0251876	10	25935994	0.03718	1	rs72789911	rs72789937	30629	0.982	25966623	NR
1	150940110	150940309	1	150938926	150939032	>s35894	0.02929	0.025243	1	150884396	-0.01716	1	rs146757670	rs1045628	80031	0.96	150964427	NR
11	2426277	2426476	11	2430599	2430599	*	0.0304399	0.0252453	11	2457289	0.01714	1	rs12271931	rs12271931	0	1	2457289	KCNQ1
17	510308	510507	17	510145	510311	>s494339>s494340	-0.0470716	0.0252955	17	497559	-0.04625	1	rs77612020	rs77612020	0	1	497559	NR
17	510308	510507	17	510145	510311	>s494339>s494340	-0.0470716	0.0252955	17	497559	-0.04625	1	rs77612020	rs77612020	0	1	497559	RP5-1029F21.3
17	510308	510507	17	510145	510311	>s494339>s494340	-0.0470716	0.0252955	17	497559	-0.04625	1	rs77612020	rs16952930	1048	0.985	498607	RP5-1029F21.3
12	88673854	88674053	12	88664963	88671664	>s383580>s383581	0.0473581	0.0255435	12	88617474	0.02752	1	rs34200313	rs34200313	0	1	88617474	NA
13	111515983	111516182	13	111518653	111518719	>s416242	-0.0342274	0.0256431	13	111442333	0.02813	1	rs76583431	rs118166185	9222	0.996	111451555	TEX29,LINC00354
6	27115585	27115784	6	27113115	27113220	>s174559	0.0204611	0.0256544	6	27033276	0.01645	1	rs13191659	rs13191659	0	1	27033276	HLA
6	27115585	27115784	6	27113115	27113220	>s174559	0.0204611	0.0256544	6	27033276	0.01645	1	rs13191659	rs13191659	0	1	27033276	LINC00240,HIST1H2BJ
6	27115585	27115784	6	27113115	27113220	>s174559	0.0204611	0.0256544	6	27033276	0.01645	1	rs13191659	rs13191659	0	1	27033276	LINC00240,HIST1H2BJ
6	27115585	27115784	6	27113115	27113220	>s174559	0.0204611	0.0256544	6	27033276	0.01645	1	rs13191659	rs13191659	0	1	27033276	NA
6	27115585	27115784	6	27113115	27113220	>s174559	0.0204611	0.0256544	6	27033276	0.01645	1	rs13191659	rs13191659	0	1	27033276	HIST1H2BJ
6	27115585	27115784	6	27113115	27113220	>s174559	0.0204611	0.0256544	6	27033276	0.01645	1	rs13191659	rs13194491	36025	0.978	27069301	HIST1H2BJ
6	27115585	27115784	6	27113115	27113220	>s174559	0.0204611	0.0256544	6	27033276	0.01645	1	rs13191659	rs13194491	36025	0.978	27069301	LINC00240
6	27115585	27115784	6	27113115	27113220	>s174559	0.0204611	0.0256544	6	27033276	0.01645	1	rs13191659	rs35657082	66602	0.981	27099878	NA
6	27115585	27115784	6	27113115	27113220	>s174559	0.0204611	0.0256544	6	27033276	0.01645	1	rs13191659	rs35657082	66602	0.981	27099878	NA
6	27115585	27115784	6	27113115	27113220	>s174559	0.0204611	0.0256544	6	27033276	0.01645	1	rs13191659	rs35657082	66602	0.981	27099878	NA
20	57026772	57026971	20	57030431	57030696	>s574437	0.0425069	0.025788	20	57087507	0.03412	1	rs77225098	rs77225098	0	1	57087507	NR
17	45581919	45582118	17	45585730	45585730	<s825367>s865242<s825365<s825364<s825363	-0.0409382	0.0259093	17	45492404	-0.02716	1	rs62065448	rs62064598	95102	0.952	45397302	ENSG00000267344
17	45581919	45582118	17	45585730	45585730	<s825367>s865242<s825365<s825364<s825363	-0.0409382	0.0259093	17	45492404	-0.02716	1	rs62065448	rs62064641	80978	0.96	45411426	NR
17	45581919	45582118	17	45585730	45585730	<s825367>s865242<s825365<s825364<s825363	-0.0409382	0.0259093	17	45492404	-0.02716	1	rs62065448	rs62064641	80978	0.96	45411426	NA
17	45581919	45582118	17	45585730	45585730	<s825367>s865242<s825365<s825364<s825363	-0.0409382	0.0259093	17	45492404	-0.02716	1	rs62065448	rs35519908	70442	0.962	45421962	NR
17	45581919	45582118	17	45585730	45585730	<s825367>s865242<s825365<s825364<s825363	-0.0409382	0.0259093	17	45492404	-0.02716	1	rs62065448	rs12949256	62473	0.965	45429931	ARHGAP27
17	45581919	45582118	17	45585730	45585730	<s825367>s865242<s825365<s825364<s825363	-0.0409382	0.0259093	17	45492404	-0.02716	1	rs62065448	rs34465449	58335	0.972	45434069	NA
17	45581919	45582118	17	45585730	45585730	<s825367>s865242<s825365<s825364<s825363	-0.0409382	0.0259093	17	45492404	-0.02716	1	rs62065448	rs56168933	57452	0.972	45434952	ARHGAP27
17	45581919	45582118	17	45585730	45585730	<s825367>s865242<s825365<s825364<s825363	-0.0409382	0.0259093	17	45492404	-0.02716	1	rs62065448	rs11012	56329	0.972	45436075	MAPT,PLEKHM1,IMP5
17	45581919	45582118	17	45585730	45585730	<s825367>s865242<s825365<s825364<s825363	-0.0409382	0.0259093	17	45492404	-0.02716	1	rs62065448	rs35354512	53843	0.972	45438561	NA
17	45581919	45582118	17	45585730	45585730	<s825367>s865242<s825365<s825364<s825363	-0.0409382	0.0259093	17	45492404	-0.02716	1	rs62065448	rs35354512	53843	0.972	45438561	NA
17	45581919	45582118	17	45585730	45585730	<s825367>s865242<s825365<s825364<s825363	-0.0409382	0.0259093	17	45492404	-0.02716	1	rs62065448	rs17631303	53368	0.972	45439036	NR
17	45581919	45582118	17	45585730	45585730	<s825367>s865242<s825365<s825364<s825363	-0.0409382	0.0259093	17	45492404	-0.02716	1	rs62065448	rs17631303	53368	0.972	45439036	intergenic
17	45581919	45582118	17	45585730	45585730	<s825367>s865242<s825365<s825364<s825363	-0.0409382	0.0259093	17	45492404	-0.02716	1	rs62065448	rs149366495	20162	0.986	45472242	PLEKHM1
17	45581919	45582118	17	45585730	45585730	<s825367>s865242<s825365<s825364<s825363	-0.0409382	0.0259093	17	45492404	-0.02716	1	rs62065448	rs56192752	14517	0.984	45477887	NA
17	45581919	45582118	17	45585730	45585730	<s825367>s865242<s825365<s825364<s825363	-0.0409382	0.0259093	17	45492404	-0.02716	1	rs62065448	rs56192752	14517	0.984	45477887	NA
17	45581919	45582118	17	45585730	45585730	<s825367>s865242<s825365<s825364<s825363	-0.0409382	0.0259093	17	45492404	-0.02716	1	rs62065448	rs56192752	14517	0.984	45477887	NA
17	45581919	45582118	17	45585730	45585730	<s825367>s865242<s825365<s825364<s825363	-0.0409382	0.0259093	17	45492404	-0.02716	1	rs62065448	rs56192752	14517	0.984	45477887	NA
17	45581919	45582118	17	45585730	45585730	<s825367>s865242<s825365<s825364<s825363	-0.0409382	0.0259093	17	45492404	-0.02716	1	rs62065448	rs113322852	525	0.987	45491879	NR
17	45581919	45582118	17	45585730	45585730	<s825367>s865242<s825365<s825364<s825363	-0.0409382	0.0259093	17	45492404	-0.02716	1	rs62065448	rs113322852	525	0.987	45491879	NR
8	144583065	144583264	8	144582083	144582083	*	-0.0408159	0.0259094	8	144532459	0.03232	1	rs117567558	rs117567558	0	1	144532459	NR
8	144583065	144583264	8	144582083	144582083	*	-0.0408159	0.0259094	8	144532459	0.03232	1	rs117567558	rs117567558	0	1	144532459	NR
14	105279613	105279812	14	105276985	105277515	>s444889>s444890>s444894>s444896>s444897>s444898>s444900>s444902>s444903>s444904>s444905>s444906>s444907>s444908	0.0299748	0.0259738	14	105261860	-0.02065	1	rs76752037	rs76752037	0	1	105261860	NR
6	31902756	31902955	6	31907863	31911038	>s175314	0.0392312	0.0261794	6	31867387	-0.03803	1	rs693906	rs622076	8459	0.998	31858928	NEU1
6	31902756	31902955	6	31907863	31911038	>s175314	0.0392312	0.0261794	6	31867387	-0.03803	1	rs693906	rs622076	8459	0.998	31858928	NA
6	31902756	31902955	6	31907863	31911038	>s175314	0.0392312	0.0261794	6	31867387	-0.03803	1	rs693906	rs693906	0	1	31867387	NR
6	31902756	31902955	6	31907863	31911038	>s175314	0.0392312	0.0261794	6	31867387	-0.03803	1	rs693906	rs693906	0	1	31867387	NA
2	241879041	241879224	2	241876485	241876536	*	-0.111765	0.0262807	2	241904704	-0.1094	1	rs78855648	rs80145046	4765	0.962	241899939	LOC101927289
19	49062411	49062610	19	49064541	49064541	*	0.0228014	0.0263524	19	49028804	0.02138	1	rs141045427	rs7251022	2897	0.995	49031701	NR
4	188500720	188500919	4	188506820	188506831	*	0.0285755	0.026365	4	188509518	0.02429	1	rs79373855	rs116330320	2329	1	188507189	RPL7AP27,HSP90AA4P
17	82216504	82216703	17	82215942	82215942	*	0.0360976	0.0265836	17	82234119	-0.03587	1	rs9674487	rs9674487	0	1	82234119	NA
7	140579639	140579838	7	140583251	140584184	>s217353	0.0239762	0.0267123	7	140531206	0.01841	1	rs2363830	rs10237118	124	0.995	140531330	DENND2A
8	46421858	46422057	8	46419337	46419337	*	0.0329098	0.0267152	8	46393128	0.01441	1	rs150855844	rs118024684	113347	0.964	46506475	Intergenic
15	43683039	43683238	15	43666668	43680376	*	0.0247202	0.0267782	15	43760050	0.007403	1	rs117519814	rs117519814	0	1	43760050	NA
15	43683039	43683238	15	43666668	43680376	*	0.0247202	0.0267782	15	43760050	0.007403	1	rs117519814	rs117519814	0	1	43760050	NA
15	43683039	43683238	15	43666668	43680376	*	0.0247202	0.0267782	15	43760050	0.007403	1	rs117519814	rs117519814	0	1	43760050	NA
15	43683039	43683238	15	43666668	43680376	*	0.0247202	0.0267782	15	43760050	0.007403	1	rs117519814	rs117519814	0	1	43760050	NA
15	43683039	43683238	15	43666668	43680376	*	0.0247202	0.0267782	15	43760050	0.007403	1	rs117519814	rs117519814	0	1	43760050	NA
17	8087347	8087546	17	8093874	8093972	>s496875	0.0255677	0.0267833	17	8017688	-0.02363	1	rs80076597	rs78671965	61689	0.951	7955999	NA
2	126387328	126387527	2	126392474	126399919	>s72222>s72223>s72224	0.0465368	0.0268757	2	126329321	0.03393	1	rs74645482	rs28504487	7042	0.988	126336363	NA
10	102999352	102999551	10	102992220	102992615	>s342786	0.0250906	0.0270926	10	103069712	-0.01474	1	rs1926032	rs1926032	0	1	103069712	CNNM2
10	102999352	102999551	10	102992220	102992615	>s342786	0.0250906	0.0270926	10	103069712	-0.01474	1	rs1926032	rs1926032	0	1	103069712	NA
10	102999352	102999551	10	102992220	102992615	>s342786	0.0250906	0.0270926	10	103069712	-0.01474	1	rs1926032	rs1926032	0	1	103069712	NA
10	102999352	102999551	10	102992220	102992615	>s342786	0.0250906	0.0270926	10	103069712	-0.01474	1	rs1926032	rs1926032	0	1	103069712	NA
10	102999352	102999551	10	102992220	102992615	>s342786	0.0250906	0.0270926	10	103069712	-0.01474	1	rs1926032	rs1926032	0	1	103069712	NA
10	102999352	102999551	10	102992220	102992615	>s342786	0.0250906	0.0270926	10	103069712	-0.01474	1	rs1926032	rs1926032	0	1	103069712	NA
10	102812616	102812815	10	102811926	102811998	>s342773	-0.0278144	0.027379	10	102901488	0.02145	1	rs17884001	rs3740390	22765	0.969	102878723	AS3MT,C10orf32-ASMT
10	102812616	102812815	10	102811926	102811998	>s342773	-0.0278144	0.027379	10	102901488	0.02145	1	rs17884001	rs3740390	22765	0.969	102878723	AS3MT,C10orf32-ASMT
10	102812616	102812815	10	102811926	102811998	>s342773	-0.0278144	0.027379	10	102901488	0.02145	1	rs17884001	rs3740390	22765	0.969	102878723	NR
10	102812616	102812815	10	102811926	102811998	>s342773	-0.0278144	0.027379	10	102901488	0.02145	1	rs17884001	rs11191447	8922	0.969	102892566	BORCS7-ASMT
10	102812616	102812815	10	102811926	102811998	>s342773	-0.0278144	0.027379	10	102901488	0.02145	1	rs17884001	rs11191447	8922	0.969	102892566	NA
10	102812616	102812815	10	102811926	102811998	>s342773	-0.0278144	0.027379	10	102901488	0.02145	1	rs17884001	rs11191447	8922	0.969	102892566	NA
10	102812616	102812815	10	102811926	102811998	>s342773	-0.0278144	0.027379	10	102901488	0.02145	1	rs17884001	rs11191454	1241	1	102900247	AS3MT
10	102812616	102812815	10	102811926	102811998	>s342773	-0.0278144	0.027379	10	102901488	0.02145	1	rs17884001	rs78821730	23299	0.998	102924787	NT5C2
10	102812616	102812815	10	102811926	102811998	>s342773	-0.0278144	0.027379	10	102901488	0.02145	1	rs17884001	rs78821730	23299	0.998	102924787	NR
10	102812616	102812815	10	102811926	102811998	>s342773	-0.0278144	0.027379	10	102901488	0.02145	1	rs17884001	rs12411886	24054	0.998	102925542	NA
10	102812616	102812815	10	102811926	102811998	>s342773	-0.0278144	0.027379	10	102901488	0.02145	1	rs17884001	rs11191472	45771	0.998	102947259	NA
10	102812616	102812815	10	102811926	102811998	>s342773	-0.0278144	0.027379	10	102901488	0.02145	1	rs17884001	rs12413409	57851	0.997	102959339	CNNM2
10	102812616	102812815	10	102811926	102811998	>s342773	-0.0278144	0.027379	10	102901488	0.02145	1	rs17884001	rs12413409	57851	0.997	102959339	intergenic
10	102812616	102812815	10	102811926	102811998	>s342773	-0.0278144	0.027379	10	102901488	0.02145	1	rs17884001	rs12413409	57851	0.997	102959339	NT5C2,CNNM2,CYP17A1
10	102812616	102812815	10	102811926	102811998	>s342773	-0.0278144	0.027379	10	102901488	0.02145	1	rs17884001	rs12413409	57851	0.997	102959339	NT5C2,CNNM2,CYP17A1
10	102812616	102812815	10	102811926	102811998	>s342773	-0.0278144	0.027379	10	102901488	0.02145	1	rs17884001	rs12413409	57851	0.997	102959339	NT5C2,CNNM2,YP17A1
10	102812616	102812815	10	102811926	102811998	>s342773	-0.0278144	0.027379	10	102901488	0.02145	1	rs17884001	rs12413409	57851	0.997	102959339	CNNM2
10	102812616	102812815	10	102811926	102811998	>s342773	-0.0278144	0.027379	10	102901488	0.02145	1	rs17884001	rs12413409	57851	0.997	102959339	CNNM2
10	102812616	102812815	10	102811926	102811998	>s342773	-0.0278144	0.027379	10	102901488	0.02145	1	rs17884001	rs11191479	62375	0.998	102963863	NA
10	102812616	102812815	10	102811926	102811998	>s342773	-0.0278144	0.027379	10	102901488	0.02145	1	rs17884001	rs77860422	86764	0.997	102988252	NA
10	102812616	102812815	10	102811926	102811998	>s342773	-0.0278144	0.027379	10	102901488	0.02145	1	rs17884001	rs77860422	86764	0.997	102988252	NA
10	102812616	102812815	10	102811926	102811998	>s342773	-0.0278144	0.027379	10	102901488	0.02145	1	rs17884001	rs77860422	86764	0.997	102988252	NA
10	102812616	102812815	10	102811926	102811998	>s342773	-0.0278144	0.027379	10	102901488	0.02145	1	rs17884001	rs11191499	103026	0.991	103004514	NR
10	102812616	102812815	10	102811926	102811998	>s342773	-0.0278144	0.027379	10	102901488	0.02145	1	rs17884001	rs11191499	103026	0.991	103004514	NR
10	102812616	102812815	10	102811926	102811998	>s342773	-0.0278144	0.027379	10	102901488	0.02145	1	rs17884001	rs11191502	104249	0.991	103005737	CNNM2
10	102812616	102812815	10	102811926	102811998	>s342773	-0.0278144	0.027379	10	102901488	0.02145	1	rs17884001	rs11191514	112119	0.99	103013607	NR
10	102812616	102812815	10	102811926	102811998	>s342773	-0.0278144	0.027379	10	102901488	0.02145	1	rs17884001	rs75970938	132403	0.985	103033891	NR
10	102812616	102812815	10	102811926	102811998	>s342773	-0.0278144	0.027379	10	102901488	0.02145	1	rs17884001	rs79668541	132659	0.985	103034147	CNNM2
10	102812616	102812815	10	102811926	102811998	>s342773	-0.0278144	0.027379	10	102901488	0.02145	1	rs17884001	rs79668541	132659	0.985	103034147	NA
10	102812616	102812815	10	102811926	102811998	>s342773	-0.0278144	0.027379	10	102901488	0.02145	1	rs17884001	rs943037	174674	0.983	103076162	CYP17A1,NT5C2
10	102812616	102812815	10	102811926	102811998	>s342773	-0.0278144	0.027379	10	102901488	0.02145	1	rs17884001	rs943037	174674	0.983	103076162	CYP17A1,NT5C2
10	102812616	102812815	10	102811926	102811998	>s342773	-0.0278144	0.027379	10	102901488	0.02145	1	rs17884001	rs11191548	184933	0.963	103086421	NT5C2,AS3MT,CNNM2,CYP17A1
10	102812616	102812815	10	102811926	102811998	>s342773	-0.0278144	0.027379	10	102901488	0.02145	1	rs17884001	rs11191548	184933	0.963	103086421	NT5C2,CNNM2,CYP17A1
10	102812616	102812815	10	102811926	102811998	>s342773	-0.0278144	0.027379	10	102901488	0.02145	1	rs17884001	rs11191548	184933	0.963	103086421	NT5C2,CNNM2,CYP17A1
10	102812616	102812815	10	102811926	102811998	>s342773	-0.0278144	0.027379	10	102901488	0.02145	1	rs17884001	rs11191548	184933	0.963	103086421	NT5C2,CYP17A1
10	102812616	102812815	10	102811926	102811998	>s342773	-0.0278144	0.027379	10	102901488	0.02145	1	rs17884001	rs11191548	184933	0.963	103086421	NT5C2,CYP17A1
10	102812616	102812815	10	102811926	102811998	>s342773	-0.0278144	0.027379	10	102901488	0.02145	1	rs17884001	rs11191548	184933	0.963	103086421	CNMM2,NT5C2,CYP17A1
10	102812616	102812815	10	102811926	102811998	>s342773	-0.0278144	0.027379	10	102901488	0.02145	1	rs17884001	rs11191548	184933	0.963	103086421	CNMM2,NT5C2,CYP17A1
10	102812616	102812815	10	102811926	102811998	>s342773	-0.0278144	0.027379	10	102901488	0.02145	1	rs17884001	rs11191548	184933	0.963	103086421	CYP17A1,NT5C2
10	102812616	102812815	10	102811926	102811998	>s342773	-0.0278144	0.027379	10	102901488	0.02145	1	rs17884001	rs11191548	184933	0.963	103086421	CYP17A1,NT5C2
10	102812616	102812815	10	102811926	102811998	>s342773	-0.0278144	0.027379	10	102901488	0.02145	1	rs17884001	rs11191548	184933	0.963	103086421	CYP17A1,NT5C2
10	102812616	102812815	10	102811926	102811998	>s342773	-0.0278144	0.027379	10	102901488	0.02145	1	rs17884001	rs11191548	184933	0.963	103086421	CYP17A1,NT5C2
10	102812616	102812815	10	102811926	102811998	>s342773	-0.0278144	0.027379	10	102901488	0.02145	1	rs17884001	rs11191548	184933	0.963	103086421	CYP17A1,NT5C2,CNNM2-AS3MT
10	102812616	102812815	10	102811926	102811998	>s342773	-0.0278144	0.027379	10	102901488	0.02145	1	rs17884001	rs11191548	184933	0.963	103086421	CYP17A1,NT5C2,CNNM2-AS3MT
10	102812616	102812815	10	102811926	102811998	>s342773	-0.0278144	0.027379	10	102901488	0.02145	1	rs17884001	rs11191548	184933	0.963	103086421	CNNM2
10	102812616	102812815	10	102811926	102811998	>s342773	-0.0278144	0.027379	10	102901488	0.02145	1	rs17884001	rs11191548	184933	0.963	103086421	CNNM2
10	102812616	102812815	10	102811926	102811998	>s342773	-0.0278144	0.027379	10	102901488	0.02145	1	rs17884001	rs11191548	184933	0.963	103086421	CNNM2
10	102812616	102812815	10	102811926	102811998	>s342773	-0.0278144	0.027379	10	102901488	0.02145	1	rs17884001	rs11191548	184933	0.963	103086421	CNNM2
10	102812616	102812815	10	102811926	102811998	>s342773	-0.0278144	0.027379	10	102901488	0.02145	1	rs17884001	rs11191548	184933	0.963	103086421	CNNM2
10	102812616	102812815	10	102811926	102811998	>s342773	-0.0278144	0.027379	10	102901488	0.02145	1	rs17884001	rs11191548	184933	0.963	103086421	NR
10	102812616	102812815	10	102811926	102811998	>s342773	-0.0278144	0.027379	10	102901488	0.02145	1	rs17884001	rs11191548	184933	0.963	103086421	CNNM2
10	102812616	102812815	10	102811926	102811998	>s342773	-0.0278144	0.027379	10	102901488	0.02145	1	rs17884001	rs11191559	206441	0.972	103107929	NT5C2
10	102812616	102812815	10	102811926	102811998	>s342773	-0.0278144	0.027379	10	102901488	0.02145	1	rs17884001	rs11191560	207793	0.973	103109281	NT5C2
10	102812616	102812815	10	102811926	102811998	>s342773	-0.0278144	0.027379	10	102901488	0.02145	1	rs17884001	rs11191560	207793	0.973	103109281	NT5C2
10	102812616	102812815	10	102811926	102811998	>s342773	-0.0278144	0.027379	10	102901488	0.02145	1	rs17884001	rs11191560	207793	0.973	103109281	NT5C2
10	102812616	102812815	10	102811926	102811998	>s342773	-0.0278144	0.027379	10	102901488	0.02145	1	rs17884001	rs11191560	207793	0.973	103109281	NT5C2
10	102812616	102812815	10	102811926	102811998	>s342773	-0.0278144	0.027379	10	102901488	0.02145	1	rs17884001	rs11191560	207793	0.973	103109281	NT5C2
10	102812616	102812815	10	102811926	102811998	>s342773	-0.0278144	0.027379	10	102901488	0.02145	1	rs17884001	rs11191560	207793	0.973	103109281	NT5C2
10	102812616	102812815	10	102811926	102811998	>s342773	-0.0278144	0.027379	10	102901488	0.02145	1	rs17884001	rs11191560	207793	0.973	103109281	NT5C2
10	102812616	102812815	10	102811926	102811998	>s342773	-0.0278144	0.027379	10	102901488	0.02145	1	rs17884001	rs11191560	207793	0.973	103109281	NT5C2
10	102812616	102812815	10	102811926	102811998	>s342773	-0.0278144	0.027379	10	102901488	0.02145	1	rs17884001	rs11191560	207793	0.973	103109281	NR
10	102812616	102812815	10	102811926	102811998	>s342773	-0.0278144	0.027379	10	102901488	0.02145	1	rs17884001	rs10883832	210034	0.973	103111522	NR
10	102812616	102812815	10	102811926	102811998	>s342773	-0.0278144	0.027379	10	102901488	0.02145	1	rs17884001	rs10883832	210034	0.973	103111522	NT5C2,CNNM2
10	102812616	102812815	10	102811926	102811998	>s342773	-0.0278144	0.027379	10	102901488	0.02145	1	rs17884001	rs10883832	210034	0.973	103111522	NT5C2
10	102812616	102812815	10	102811926	102811998	>s342773	-0.0278144	0.027379	10	102901488	0.02145	1	rs17884001	rs10883832	210034	0.973	103111522	NT5C2
10	102812616	102812815	10	102811926	102811998	>s342773	-0.0278144	0.027379	10	102901488	0.02145	1	rs17884001	rs732998	236656	0.968	103138144	NT5C2
10	102812616	102812815	10	102811926	102811998	>s342773	-0.0278144	0.027379	10	102901488	0.02145	1	rs17884001	rs12220375	240246	0.971	103141734	NR
10	102812616	102812815	10	102811926	102811998	>s342773	-0.0278144	0.027379	10	102901488	0.02145	1	rs17884001	rs11191580	244966	0.963	103146454	NT5C2
10	102812616	102812815	10	102811926	102811998	>s342773	-0.0278144	0.027379	10	102901488	0.02145	1	rs17884001	rs11191580	244966	0.963	103146454	NT5C2,other,genes,CNNM2
10	102812616	102812815	10	102811926	102811998	>s342773	-0.0278144	0.027379	10	102901488	0.02145	1	rs17884001	rs11191580	244966	0.963	103146454	NT5C2
10	102812616	102812815	10	102811926	102811998	>s342773	-0.0278144	0.027379	10	102901488	0.02145	1	rs17884001	rs11191580	244966	0.963	103146454	NT5C2
10	102812616	102812815	10	102811926	102811998	>s342773	-0.0278144	0.027379	10	102901488	0.02145	1	rs17884001	rs11191580	244966	0.963	103146454	NR
10	102812616	102812815	10	102811926	102811998	>s342773	-0.0278144	0.027379	10	102901488	0.02145	1	rs17884001	rs11191580	244966	0.963	103146454	NT5C2
10	102812616	102812815	10	102811926	102811998	>s342773	-0.0278144	0.027379	10	102901488	0.02145	1	rs17884001	rs11191580	244966	0.963	103146454	NT5C2
10	102812616	102812815	10	102811926	102811998	>s342773	-0.0278144	0.027379	10	102901488	0.02145	1	rs17884001	rs11191580	244966	0.963	103146454	NT5C2
10	102812616	102812815	10	102811926	102811998	>s342773	-0.0278144	0.027379	10	102901488	0.02145	1	rs17884001	rs11191580	244966	0.963	103146454	NT5C2
10	102812616	102812815	10	102811926	102811998	>s342773	-0.0278144	0.027379	10	102901488	0.02145	1	rs17884001	rs11191580	244966	0.963	103146454	NT5C2
10	102812616	102812815	10	102811926	102811998	>s342773	-0.0278144	0.027379	10	102901488	0.02145	1	rs17884001	rs11191580	244966	0.963	103146454	NT5C2
10	102812616	102812815	10	102811926	102811998	>s342773	-0.0278144	0.027379	10	102901488	0.02145	1	rs17884001	rs11191580	244966	0.963	103146454	NA
10	102812616	102812815	10	102811926	102811998	>s342773	-0.0278144	0.027379	10	102901488	0.02145	1	rs17884001	rs11191580	244966	0.963	103146454	NA
10	102812616	102812815	10	102811926	102811998	>s342773	-0.0278144	0.027379	10	102901488	0.02145	1	rs17884001	rs11191580	244966	0.963	103146454	NT5C2
10	102812616	102812815	10	102811926	102811998	>s342773	-0.0278144	0.027379	10	102901488	0.02145	1	rs17884001	rs11191580	244966	0.963	103146454	NT5C2
10	102812616	102812815	10	102811926	102811998	>s342773	-0.0278144	0.027379	10	102901488	0.02145	1	rs17884001	rs79680647	249714	0.972	103151202	NA
10	102812616	102812815	10	102811926	102811998	>s342773	-0.0278144	0.027379	10	102901488	0.02145	1	rs17884001	rs79680647	249714	0.972	103151202	NA
10	102812616	102812815	10	102811926	102811998	>s342773	-0.0278144	0.027379	10	102901488	0.02145	1	rs17884001	rs11191582	252408	0.97	103153896	ACTR1A,ARL3,AS3MT,BORCS7,BORCS7-ASMT,CNNM2,CYP17A1,INA,MFSD13A,MIR1307,NT5C2,PCGF6,PDCD11,RPEL1,SFXN2,SUFU,TAF5,TRIM8,USMG5,WBP1L
10	102812616	102812815	10	102811926	102811998	>s342773	-0.0278144	0.027379	10	102901488	0.02145	1	rs17884001	rs11191582	252408	0.97	103153896	NR
10	102812616	102812815	10	102811926	102811998	>s342773	-0.0278144	0.027379	10	102901488	0.02145	1	rs17884001	rs11191582	252408	0.97	103153896	NR
10	102812616	102812815	10	102811926	102811998	>s342773	-0.0278144	0.027379	10	102901488	0.02145	1	rs17884001	rs11191582	252408	0.97	103153896	NA
10	102812616	102812815	10	102811926	102811998	>s342773	-0.0278144	0.027379	10	102901488	0.02145	1	rs17884001	rs74233809	252695	0.96	103154183	NT5C2
10	102812616	102812815	10	102811926	102811998	>s342773	-0.0278144	0.027379	10	102901488	0.02145	1	rs17884001	rs12416331	267669	0.971	103169157	AS3MT,C10orf32,C10orf32-ASMT,CNNM2,CYP17A1,INA,NT5C2,PCGF6,RPEL1,WBP1L
10	102812616	102812815	10	102811926	102811998	>s342773	-0.0278144	0.027379	10	102901488	0.02145	1	rs17884001	rs12416331	267669	0.971	103169157	NR
10	102812616	102812815	10	102811926	102811998	>s342773	-0.0278144	0.027379	10	102901488	0.02145	1	rs17884001	rs12416331	267669	0.971	103169157	NT5C2
10	102812616	102812815	10	102811926	102811998	>s342773	-0.0278144	0.027379	10	102901488	0.02145	1	rs17884001	rs12416331	267669	0.971	103169157	NA
10	102812616	102812815	10	102811926	102811998	>s342773	-0.0278144	0.027379	10	102901488	0.02145	1	rs17884001	rs12219304	270339	0.971	103171827	NR
10	102812616	102812815	10	102811926	102811998	>s342773	-0.0278144	0.027379	10	102901488	0.02145	1	rs17884001	rs11191593	277970	0.971	103179458	NT5C2,CYP17A1
10	102812616	102812815	10	102811926	102811998	>s342773	-0.0278144	0.027379	10	102901488	0.02145	1	rs17884001	rs11191593	277970	0.971	103179458	NT5C2
10	102812616	102812815	10	102811926	102811998	>s342773	-0.0278144	0.027379	10	102901488	0.02145	1	rs17884001	rs11191593	277970	0.971	103179458	CYP17A1,NT5C2
10	102812616	102812815	10	102811926	102811998	>s342773	-0.0278144	0.027379	10	102901488	0.02145	1	rs17884001	rs11191593	277970	0.971	103179458	NT5C2
10	102812616	102812815	10	102811926	102811998	>s342773	-0.0278144	0.027379	10	102901488	0.02145	1	rs17884001	rs11191593	277970	0.971	103179458	NT5C2
10	102812616	102812815	10	102811926	102811998	>s342773	-0.0278144	0.027379	10	102901488	0.02145	1	rs17884001	rs11191593	277970	0.971	103179458	NT5C2
10	102812616	102812815	10	102811926	102811998	>s342773	-0.0278144	0.027379	10	102901488	0.02145	1	rs17884001	rs11191593	277970	0.971	103179458	NT5C2
10	102812616	102812815	10	102811926	102811998	>s342773	-0.0278144	0.027379	10	102901488	0.02145	1	rs17884001	rs11191593	277970	0.971	103179458	NT5C2
10	102812616	102812815	10	102811926	102811998	>s342773	-0.0278144	0.027379	10	102901488	0.02145	1	rs17884001	rs11191593	277970	0.971	103179458	NA
10	102812616	102812815	10	102811926	102811998	>s342773	-0.0278144	0.027379	10	102901488	0.02145	1	rs17884001	rs77420391	284578	0.97	103186066	NR
10	102812616	102812815	10	102811926	102811998	>s342773	-0.0278144	0.027379	10	102901488	0.02145	1	rs17884001	rs77420391	284578	0.97	103186066	NR
10	102812616	102812815	10	102811926	102811998	>s342773	-0.0278144	0.027379	10	102901488	0.02145	1	rs17884001	rs77420391	284578	0.97	103186066	NA
10	102812616	102812815	10	102811926	102811998	>s342773	-0.0278144	0.027379	10	102901488	0.02145	1	rs17884001	rs77420391	284578	0.97	103186066	NA
10	102812616	102812815	10	102811926	102811998	>s342773	-0.0278144	0.027379	10	102901488	0.02145	1	rs17884001	rs79780963	291254	0.971	103192742	NR
10	102812616	102812815	10	102811926	102811998	>s342773	-0.0278144	0.027379	10	102901488	0.02145	1	rs17884001	rs79780963	291254	0.971	103192742	NR
10	102812616	102812815	10	102811926	102811998	>s342773	-0.0278144	0.027379	10	102901488	0.02145	1	rs17884001	rs79780963	291254	0.971	103192742	NT5C2,MARCKSL1P1
10	102812616	102812815	10	102811926	102811998	>s342773	-0.0278144	0.027379	10	102901488	0.02145	1	rs17884001	rs79780963	291254	0.971	103192742	NT5C2,MARCKSL1P1
10	102812616	102812815	10	102811926	102811998	>s342773	-0.0278144	0.027379	10	102901488	0.02145	1	rs17884001	rs79780963	291254	0.971	103192742	NA
10	102812616	102812815	10	102811926	102811998	>s342773	-0.0278144	0.027379	10	102901488	0.02145	1	rs17884001	rs112913898	297655	0.968	103199143	NT5C2,RPEL1
10	102812616	102812815	10	102811926	102811998	>s342773	-0.0278144	0.027379	10	102901488	0.02145	1	rs17884001	rs112913898	297655	0.968	103199143	NT5C2,RPEL1
10	102812616	102812815	10	102811926	102811998	>s342773	-0.0278144	0.027379	10	102901488	0.02145	1	rs17884001	rs112913898	297655	0.968	103199143	NT5C2,RPEL1
10	102812616	102812815	10	102811926	102811998	>s342773	-0.0278144	0.027379	10	102901488	0.02145	1	rs17884001	rs112913898	297655	0.968	103199143	NT5C2
10	102812616	102812815	10	102811926	102811998	>s342773	-0.0278144	0.027379	10	102901488	0.02145	1	rs17884001	rs112913898	297655	0.968	103199143	NT5C2
10	102812616	102812815	10	102811926	102811998	>s342773	-0.0278144	0.027379	10	102901488	0.02145	1	rs17884001	rs112913898	297655	0.968	103199143	NT5C2
10	102812616	102812815	10	102811926	102811998	>s342773	-0.0278144	0.027379	10	102901488	0.02145	1	rs17884001	rs112913898	297655	0.968	103199143	NT5C2
10	102812616	102812815	10	102811926	102811998	>s342773	-0.0278144	0.027379	10	102901488	0.02145	1	rs17884001	rs112913898	297655	0.968	103199143	NT5C2
10	102812616	102812815	10	102811926	102811998	>s342773	-0.0278144	0.027379	10	102901488	0.02145	1	rs17884001	rs112913898	297655	0.968	103199143	NA
10	102812616	102812815	10	102811926	102811998	>s342773	-0.0278144	0.027379	10	102901488	0.02145	1	rs17884001	rs112913898	297655	0.968	103199143	NA
10	102812616	102812815	10	102811926	102811998	>s342773	-0.0278144	0.027379	10	102901488	0.02145	1	rs17884001	rs112913898	297655	0.968	103199143	NA
10	102812616	102812815	10	102811926	102811998	>s342773	-0.0278144	0.027379	10	102901488	0.02145	1	rs17884001	rs11191607	297943	0.968	103199431	NR
10	102812616	102812815	10	102811926	102811998	>s342773	-0.0278144	0.027379	10	102901488	0.02145	1	rs17884001	rs11191607	297943	0.968	103199431	NR
2	48052446	48052645	2	48049387	48049387	*	0.0236947	0.0274628	2	48071852	-0.02345	1	rs11689818	rs11689818	0	1	48071852	NR
1	11526484	11526683	1	11522552	11522662	*	0.0304449	0.0275203	1	11527907	0.01831	1	rs2594302	rs2817619	15099	0.955	11543006	PTCHD2
19	3244695	3244816	19	3235509	3235569	>s532808>s532809>s532810	0.0334109	0.0277454	19	3176172	-0.01917	1	rs3760960	rs3760960	0	1	3176172	S1PR4
17	45582319	45582518	17	45585730	45585730	<s825367>s865242<s825365<s825364<s825363	-0.0384063	0.0279156	17	45680084	-0.02869	0.132413	rs55974014	rs62065453	184031	0.965	45496053	intergenic
17	45582319	45582518	17	45585730	45585730	<s825367>s865242<s825365<s825364<s825363	-0.0384063	0.0279156	17	45680084	-0.02869	0.132413	rs55974014	rs62065453	184031	0.965	45496053	NR
17	45582319	45582518	17	45585730	45585730	<s825367>s865242<s825365<s825364<s825363	-0.0384063	0.0279156	17	45680084	-0.02869	0.132413	rs55974014	rs62065453	184031	0.965	45496053	NR
17	45582319	45582518	17	45585730	45585730	<s825367>s865242<s825365<s825364<s825363	-0.0384063	0.0279156	17	45680084	-0.02869	0.132413	rs55974014	rs62065453	184031	0.965	45496053	PLEKHM1
17	45582319	45582518	17	45585730	45585730	<s825367>s865242<s825365<s825364<s825363	-0.0384063	0.0279156	17	45680084	-0.02869	0.132413	rs55974014	rs1724411	87519	0.969	45592565	LRRC37A4P,MAPK8IP1P2
17	45582319	45582518	17	45585730	45585730	<s825367>s865242<s825365<s825364<s825363	-0.0384063	0.0279156	17	45680084	-0.02869	0.132413	rs55974014	rs28768976	69133	0.98	45610951	intergenic
17	45582319	45582518	17	45585730	45585730	<s825367>s865242<s825365<s825364<s825363	-0.0384063	0.0279156	17	45680084	-0.02869	0.132413	rs55974014	rs28768976	69133	0.98	45610951	SPPL2C
17	45582319	45582518	17	45585730	45585730	<s825367>s865242<s825365<s825364<s825363	-0.0384063	0.0279156	17	45680084	-0.02869	0.132413	rs55974014	rs28768976	69133	0.98	45610951	SPPL2C
17	45582319	45582518	17	45585730	45585730	<s825367>s865242<s825365<s825364<s825363	-0.0384063	0.0279156	17	45680084	-0.02869	0.132413	rs55974014	rs365825	51849	0.98	45628235	CRHR1,LRRC37A3
17	45582319	45582518	17	45585730	45585730	<s825367>s865242<s825365<s825364<s825363	-0.0384063	0.0279156	17	45680084	-0.02869	0.132413	rs55974014	rs2942168	42600	0.985	45637484	MAPT
17	45582319	45582518	17	45585730	45585730	<s825367>s865242<s825365<s825364<s825363	-0.0384063	0.0279156	17	45680084	-0.02869	0.132413	rs55974014	rs393152	38307	0.978	45641777	MAPT,C17orf69,KIAA1267,LOC644246
17	45582319	45582518	17	45585730	45585730	<s825367>s865242<s825365<s825364<s825363	-0.0384063	0.0279156	17	45680084	-0.02869	0.132413	rs55974014	rs393152	38307	0.978	45641777	MAPT
17	45582319	45582518	17	45585730	45585730	<s825367>s865242<s825365<s825364<s825363	-0.0384063	0.0279156	17	45680084	-0.02869	0.132413	rs55974014	rs241036	25731	0.981	45654353	NR
17	45582319	45582518	17	45585730	45585730	<s825367>s865242<s825365<s825364<s825363	-0.0384063	0.0279156	17	45680084	-0.02869	0.132413	rs55974014	rs241036	25731	0.981	45654353	NA
17	45582319	45582518	17	45585730	45585730	<s825367>s865242<s825365<s825364<s825363	-0.0384063	0.0279156	17	45680084	-0.02869	0.132413	rs55974014	rs62055691	2600	0.985	45677484	CRHR1
17	45582319	45582518	17	45585730	45585730	<s825367>s865242<s825365<s825364<s825363	-0.0384063	0.0279156	17	45680084	-0.02869	0.132413	rs55974014	rs55974014	0	1	45680084	CRHR1
17	45582319	45582518	17	45585730	45585730	<s825367>s865242<s825365<s825364<s825363	-0.0384063	0.0279156	17	45680084	-0.02869	0.132413	rs55974014	rs62055701	1337	0.978	45681421	NR
17	45582319	45582518	17	45585730	45585730	<s825367>s865242<s825365<s825364<s825363	-0.0384063	0.0279156	17	45680084	-0.02869	0.132413	rs55974014	rs76761706	19291	0.984	45699375	NR
17	45582319	45582518	17	45585730	45585730	<s825367>s865242<s825365<s825364<s825363	-0.0384063	0.0279156	17	45680084	-0.02869	0.132413	rs55974014	rs80143279	19292	0.984	45699376	NR
17	45582319	45582518	17	45585730	45585730	<s825367>s865242<s825365<s825364<s825363	-0.0384063	0.0279156	17	45680084	-0.02869	0.132413	rs55974014	rs61667602	27899	0.984	45707983	CRHR1
17	45582319	45582518	17	45585730	45585730	<s825367>s865242<s825365<s825364<s825363	-0.0384063	0.0279156	17	45680084	-0.02869	0.132413	rs55974014	rs62056934	32555	0.983	45712639	NA
17	45582319	45582518	17	45585730	45585730	<s825367>s865242<s825365<s825364<s825363	-0.0384063	0.0279156	17	45680084	-0.02869	0.132413	rs55974014	rs62056934	32555	0.983	45712639	NA
17	45582319	45582518	17	45585730	45585730	<s825367>s865242<s825365<s825364<s825363	-0.0384063	0.0279156	17	45680084	-0.02869	0.132413	rs55974014	rs62056934	32555	0.983	45712639	NA
17	45582319	45582518	17	45585730	45585730	<s825367>s865242<s825365<s825364<s825363	-0.0384063	0.0279156	17	45680084	-0.02869	0.132413	rs55974014	rs55938136	40910	0.984	45720994	NR
17	45582319	45582518	17	45585730	45585730	<s825367>s865242<s825365<s825364<s825363	-0.0384063	0.0279156	17	45680084	-0.02869	0.132413	rs55974014	rs55938136	40910	0.984	45720994	NR
17	45582319	45582518	17	45585730	45585730	<s825367>s865242<s825365<s825364<s825363	-0.0384063	0.0279156	17	45680084	-0.02869	0.132413	rs55974014	rs55938136	40910	0.984	45720994	NR
17	45582319	45582518	17	45585730	45585730	<s825367>s865242<s825365<s825364<s825363	-0.0384063	0.0279156	17	45680084	-0.02869	0.132413	rs55974014	rs55938136	40910	0.984	45720994	NR
17	45582319	45582518	17	45585730	45585730	<s825367>s865242<s825365<s825364<s825363	-0.0384063	0.0279156	17	45680084	-0.02869	0.132413	rs55974014	rs55938136	40910	0.984	45720994	NR
17	45582319	45582518	17	45585730	45585730	<s825367>s865242<s825365<s825364<s825363	-0.0384063	0.0279156	17	45680084	-0.02869	0.132413	rs55974014	rs55938136	40910	0.984	45720994	NR
17	45582319	45582518	17	45585730	45585730	<s825367>s865242<s825365<s825364<s825363	-0.0384063	0.0279156	17	45680084	-0.02869	0.132413	rs55974014	rs55938136	40910	0.984	45720994	NR
17	45582319	45582518	17	45585730	45585730	<s825367>s865242<s825365<s825364<s825363	-0.0384063	0.0279156	17	45680084	-0.02869	0.132413	rs55974014	rs55938136	40910	0.984	45720994	NR
17	45582319	45582518	17	45585730	45585730	<s825367>s865242<s825365<s825364<s825363	-0.0384063	0.0279156	17	45680084	-0.02869	0.132413	rs55974014	rs55938136	40910	0.984	45720994	NR
17	45582319	45582518	17	45585730	45585730	<s825367>s865242<s825365<s825364<s825363	-0.0384063	0.0279156	17	45680084	-0.02869	0.132413	rs55974014	rs55938136	40910	0.984	45720994	NR
17	45582319	45582518	17	45585730	45585730	<s825367>s865242<s825365<s825364<s825363	-0.0384063	0.0279156	17	45680084	-0.02869	0.132413	rs55974014	rs55938136	40910	0.984	45720994	NR
17	45582319	45582518	17	45585730	45585730	<s825367>s865242<s825365<s825364<s825363	-0.0384063	0.0279156	17	45680084	-0.02869	0.132413	rs55974014	rs55938136	40910	0.984	45720994	NR
17	45582319	45582518	17	45585730	45585730	<s825367>s865242<s825365<s825364<s825363	-0.0384063	0.0279156	17	45680084	-0.02869	0.132413	rs55974014	rs55938136	40910	0.984	45720994	NR
17	45582319	45582518	17	45585730	45585730	<s825367>s865242<s825365<s825364<s825363	-0.0384063	0.0279156	17	45680084	-0.02869	0.132413	rs55974014	rs55938136	40910	0.984	45720994	NR
17	45582319	45582518	17	45585730	45585730	<s825367>s865242<s825365<s825364<s825363	-0.0384063	0.0279156	17	45680084	-0.02869	0.132413	rs55974014	rs55938136	40910	0.984	45720994	NR
17	45582319	45582518	17	45585730	45585730	<s825367>s865242<s825365<s825364<s825363	-0.0384063	0.0279156	17	45680084	-0.02869	0.132413	rs55974014	rs55938136	40910	0.984	45720994	NR
17	45582319	45582518	17	45585730	45585730	<s825367>s865242<s825365<s825364<s825363	-0.0384063	0.0279156	17	45680084	-0.02869	0.132413	rs55974014	rs55938136	40910	0.984	45720994	CRHR1
17	45582319	45582518	17	45585730	45585730	<s825367>s865242<s825365<s825364<s825363	-0.0384063	0.0279156	17	45680084	-0.02869	0.132413	rs55974014	rs55938136	40910	0.984	45720994	NA
17	45582319	45582518	17	45585730	45585730	<s825367>s865242<s825365<s825364<s825363	-0.0384063	0.0279156	17	45680084	-0.02869	0.132413	rs55974014	rs55938136	40910	0.984	45720994	NA
17	45582319	45582518	17	45585730	45585730	<s825367>s865242<s825365<s825364<s825363	-0.0384063	0.0279156	17	45680084	-0.02869	0.132413	rs55974014	rs55938136	40910	0.984	45720994	NA
17	45582319	45582518	17	45585730	45585730	<s825367>s865242<s825365<s825364<s825363	-0.0384063	0.0279156	17	45680084	-0.02869	0.132413	rs55974014	rs75022332	53423	0.978	45733507	ACBD4
17	45582319	45582518	17	45585730	45585730	<s825367>s865242<s825365<s825364<s825363	-0.0384063	0.0279156	17	45680084	-0.02869	0.132413	rs55974014	rs77804065	53446	0.957	45733530	ARHGAP27,CRHR1,KANSL1,MAPT,PLEKHM1,SPPL2C,STH
17	45582319	45582518	17	45585730	45585730	<s825367>s865242<s825365<s825364<s825363	-0.0384063	0.0279156	17	45680084	-0.02869	0.132413	rs55974014	rs77804065	53446	0.957	45733530	LINC02210,CRHR1,MAPT
17	45582319	45582518	17	45585730	45585730	<s825367>s865242<s825365<s825364<s825363	-0.0384063	0.0279156	17	45680084	-0.02869	0.132413	rs55974014	rs77804065	53446	0.957	45733530	ACBD4
17	45582319	45582518	17	45585730	45585730	<s825367>s865242<s825365<s825364<s825363	-0.0384063	0.0279156	17	45680084	-0.02869	0.132413	rs55974014	rs77804065	53446	0.957	45733530	NR
17	45582319	45582518	17	45585730	45585730	<s825367>s865242<s825365<s825364<s825363	-0.0384063	0.0279156	17	45680084	-0.02869	0.132413	rs55974014	rs77804065	53446	0.957	45733530	CRHR1
17	45582319	45582518	17	45585730	45585730	<s825367>s865242<s825365<s825364<s825363	-0.0384063	0.0279156	17	45680084	-0.02869	0.132413	rs55974014	rs17563683	53622	0.984	45733706	CRHR1,RP11-105N13.4,RP11-293E1.1
17	45582319	45582518	17	45585730	45585730	<s825367>s865242<s825365<s825364<s825363	-0.0384063	0.0279156	17	45680084	-0.02869	0.132413	rs55974014	rs17563683	53622	0.984	45733706	CRHR1,RP11-105N13.4,RP11-293E1.1
17	45582319	45582518	17	45585730	45585730	<s825367>s865242<s825365<s825364<s825363	-0.0384063	0.0279156	17	45680084	-0.02869	0.132413	rs55974014	rs17563683	53622	0.984	45733706	MGC57346-CRHR1,SPPL2C
17	45582319	45582518	17	45585730	45585730	<s825367>s865242<s825365<s825364<s825363	-0.0384063	0.0279156	17	45680084	-0.02869	0.132413	rs55974014	rs12150672	69187	0.984	45749271	NR
17	45582319	45582518	17	45585730	45585730	<s825367>s865242<s825365<s825364<s825363	-0.0384063	0.0279156	17	45680084	-0.02869	0.132413	rs55974014	rs17426174	73488	0.984	45753572	RP11-105N13.4
17	45582319	45582518	17	45585730	45585730	<s825367>s865242<s825365<s825364<s825363	-0.0384063	0.0279156	17	45680084	-0.02869	0.132413	rs55974014	rs62055888	81270	0.97	45761354	NA
17	45582319	45582518	17	45585730	45585730	<s825367>s865242<s825365<s825364<s825363	-0.0384063	0.0279156	17	45680084	-0.02869	0.132413	rs55974014	rs11079718	82501	0.982	45762585	RP11-105N13.4,CRHR1
17	45582319	45582518	17	45585730	45585730	<s825367>s865242<s825365<s825364<s825363	-0.0384063	0.0279156	17	45680084	-0.02869	0.132413	rs55974014	rs55657917	87110	0.976	45767194	HOXB2
17	45582319	45582518	17	45585730	45585730	<s825367>s865242<s825365<s825364<s825363	-0.0384063	0.0279156	17	45680084	-0.02869	0.132413	rs55974014	rs55657917	87110	0.976	45767194	HOXB2
17	45582319	45582518	17	45585730	45585730	<s825367>s865242<s825365<s825364<s825363	-0.0384063	0.0279156	17	45680084	-0.02869	0.132413	rs55974014	rs55657917	87110	0.976	45767194	CRHR1
17	45582319	45582518	17	45585730	45585730	<s825367>s865242<s825365<s825364<s825363	-0.0384063	0.0279156	17	45680084	-0.02869	0.132413	rs55974014	rs55657917	87110	0.976	45767194	LINC02210-CRHR1
17	45582319	45582518	17	45585730	45585730	<s825367>s865242<s825365<s825364<s825363	-0.0384063	0.0279156	17	45680084	-0.02869	0.132413	rs55974014	rs62055935	91300	0.979	45771384	NR
17	45582319	45582518	17	45585730	45585730	<s825367>s865242<s825365<s825364<s825363	-0.0384063	0.0279156	17	45680084	-0.02869	0.132413	rs55974014	rs79730878	91965	0.963	45772049	CRHR1-IT1-CRHR1
17	45582319	45582518	17	45585730	45585730	<s825367>s865242<s825365<s825364<s825363	-0.0384063	0.0279156	17	45680084	-0.02869	0.132413	rs55974014	rs56303031	96472	0.983	45776556	NA
17	45582319	45582518	17	45585730	45585730	<s825367>s865242<s825365<s825364<s825363	-0.0384063	0.0279156	17	45680084	-0.02869	0.132413	rs55974014	rs62057061	99189	0.975	45779273	NR
17	45582319	45582518	17	45585730	45585730	<s825367>s865242<s825365<s825364<s825363	-0.0384063	0.0279156	17	45680084	-0.02869	0.132413	rs55974014	rs62057070	102190	0.983	45782274	NR
17	45582319	45582518	17	45585730	45585730	<s825367>s865242<s825365<s825364<s825363	-0.0384063	0.0279156	17	45680084	-0.02869	0.132413	rs55974014	rs56319902	114532	0.976	45794616	NA
17	45582319	45582518	17	45585730	45585730	<s825367>s865242<s825365<s825364<s825363	-0.0384063	0.0279156	17	45680084	-0.02869	0.132413	rs55974014	rs56319902	114532	0.976	45794616	NA
17	45582319	45582518	17	45585730	45585730	<s825367>s865242<s825365<s825364<s825363	-0.0384063	0.0279156	17	45680084	-0.02869	0.132413	rs55974014	rs56319902	114532	0.976	45794616	NA
17	45582319	45582518	17	45585730	45585730	<s825367>s865242<s825365<s825364<s825363	-0.0384063	0.0279156	17	45680084	-0.02869	0.132413	rs55974014	rs56319902	114532	0.976	45794616	NA
17	45582319	45582518	17	45585730	45585730	<s825367>s865242<s825365<s825364<s825363	-0.0384063	0.0279156	17	45680084	-0.02869	0.132413	rs55974014	rs8072451	136266	0.982	45816350	MAPT,GRN,CRHR1,STH
17	45582319	45582518	17	45585730	45585730	<s825367>s865242<s825365<s825364<s825363	-0.0384063	0.0279156	17	45680084	-0.02869	0.132413	rs55974014	rs62057107	138582	0.982	45818666	Intergenic
17	45582319	45582518	17	45585730	45585730	<s825367>s865242<s825365<s825364<s825363	-0.0384063	0.0279156	17	45680084	-0.02869	0.132413	rs55974014	rs62057107	138582	0.982	45818666	Intergenic
17	45582319	45582518	17	45585730	45585730	<s825367>s865242<s825365<s825364<s825363	-0.0384063	0.0279156	17	45680084	-0.02869	0.132413	rs55974014	rs79600142	140272	0.983	45820356	NR
17	45582319	45582518	17	45585730	45585730	<s825367>s865242<s825365<s825364<s825363	-0.0384063	0.0279156	17	45680084	-0.02869	0.132413	rs55974014	rs17689882	149378	0.98	45829462	CRHR1
17	45582319	45582518	17	45585730	45585730	<s825367>s865242<s825365<s825364<s825363	-0.0384063	0.0279156	17	45680084	-0.02869	0.132413	rs55974014	rs16940672	150702	0.98	45830786	CRHR1
17	45582319	45582518	17	45585730	45585730	<s825367>s865242<s825365<s825364<s825363	-0.0384063	0.0279156	17	45680084	-0.02869	0.132413	rs55974014	rs1876829	153993	0.982	45834077	NR
17	45582319	45582518	17	45585730	45585730	<s825367>s865242<s825365<s825364<s825363	-0.0384063	0.0279156	17	45680084	-0.02869	0.132413	rs55974014	rs1876829	153993	0.982	45834077	NR
17	45582319	45582518	17	45585730	45585730	<s825367>s865242<s825365<s825364<s825363	-0.0384063	0.0279156	17	45680084	-0.02869	0.132413	rs55974014	rs2106785	161655	0.977	45841739	ACBD4
17	45582319	45582518	17	45585730	45585730	<s825367>s865242<s825365<s825364<s825363	-0.0384063	0.0279156	17	45680084	-0.02869	0.132413	rs55974014	rs12185233	166204	0.973	45846288	NR
17	45582319	45582518	17	45585730	45585730	<s825367>s865242<s825365<s825364<s825363	-0.0384063	0.0279156	17	45680084	-0.02869	0.132413	rs55974014	rs12185268	166233	0.981	45846317	MAPT
17	45582319	45582518	17	45585730	45585730	<s825367>s865242<s825365<s825364<s825363	-0.0384063	0.0279156	17	45680084	-0.02869	0.132413	rs55974014	rs12185268	166233	0.981	45846317	MAPT
17	45582319	45582518	17	45585730	45585730	<s825367>s865242<s825365<s825364<s825363	-0.0384063	0.0279156	17	45680084	-0.02869	0.132413	rs55974014	rs12373123	166623	0.981	45846707	SPPL2C
17	45582319	45582518	17	45585730	45585730	<s825367>s865242<s825365<s825364<s825363	-0.0384063	0.0279156	17	45680084	-0.02869	0.132413	rs55974014	rs12373123	166623	0.981	45846707	NA
17	45582319	45582518	17	45585730	45585730	<s825367>s865242<s825365<s825364<s825363	-0.0384063	0.0279156	17	45680084	-0.02869	0.132413	rs55974014	rs12373142	166750	0.981	45846834	SPPL2C
17	45582319	45582518	17	45585730	45585730	<s825367>s865242<s825365<s825364<s825363	-0.0384063	0.0279156	17	45680084	-0.02869	0.132413	rs55974014	rs12373142	166750	0.981	45846834	SPPL2C
17	45582319	45582518	17	45585730	45585730	<s825367>s865242<s825365<s825364<s825363	-0.0384063	0.0279156	17	45680084	-0.02869	0.132413	rs55974014	rs12373124	166769	0.981	45846853	intergenic
17	45582319	45582518	17	45585730	45585730	<s825367>s865242<s825365<s825364<s825363	-0.0384063	0.0279156	17	45680084	-0.02869	0.132413	rs55974014	rs12373124	166769	0.981	45846853	NR
17	45582319	45582518	17	45585730	45585730	<s825367>s865242<s825365<s825364<s825363	-0.0384063	0.0279156	17	45680084	-0.02869	0.132413	rs55974014	rs17769552	169840	0.967	45849924	SPPL2C
17	45582319	45582518	17	45585730	45585730	<s825367>s865242<s825365<s825364<s825363	-0.0384063	0.0279156	17	45680084	-0.02869	0.132413	rs55974014	rs79412431	182571	0.973	45862655	MAPT-AS1
17	45582319	45582518	17	45585730	45585730	<s825367>s865242<s825365<s825364<s825363	-0.0384063	0.0279156	17	45680084	-0.02869	0.132413	rs55974014	rs79412431	182571	0.973	45862655	MAPT-AS1
17	45582319	45582518	17	45585730	45585730	<s825367>s865242<s825365<s825364<s825363	-0.0384063	0.0279156	17	45680084	-0.02869	0.132413	rs55974014	rs79412431	182571	0.973	45862655	MAPT-AS1
17	45582319	45582518	17	45585730	45585730	<s825367>s865242<s825365<s825364<s825363	-0.0384063	0.0279156	17	45680084	-0.02869	0.132413	rs55974014	rs10491140	193526	0.98	45873610	NA
17	45582319	45582518	17	45585730	45585730	<s825367>s865242<s825365<s825364<s825363	-0.0384063	0.0279156	17	45680084	-0.02869	0.132413	rs55974014	rs2214258	196269	0.978	45876353	intergenic
17	45582319	45582518	17	45585730	45585730	<s825367>s865242<s825365<s825364<s825363	-0.0384063	0.0279156	17	45680084	-0.02869	0.132413	rs55974014	rs62055544	207089	0.967	45887173	NR
17	45582319	45582518	17	45585730	45585730	<s825367>s865242<s825365<s825364<s825363	-0.0384063	0.0279156	17	45680084	-0.02869	0.132413	rs55974014	rs62055546	207117	0.976	45887201	MAPT
17	45582319	45582518	17	45585730	45585730	<s825367>s865242<s825365<s825364<s825363	-0.0384063	0.0279156	17	45680084	-0.02869	0.132413	rs55974014	rs76324150	215783	0.98	45895867	ARHGAP27,MAPT,STH,NSF,WNT3
17	45582319	45582518	17	45585730	45585730	<s825367>s865242<s825365<s825364<s825363	-0.0384063	0.0279156	17	45680084	-0.02869	0.132413	rs55974014	rs62056789	217965	0.98	45898049	MAPT
17	45582319	45582518	17	45585730	45585730	<s825367>s865242<s825365<s825364<s825363	-0.0384063	0.0279156	17	45680084	-0.02869	0.132413	rs55974014	rs62056789	217965	0.98	45898049	MAPT
17	45582319	45582518	17	45585730	45585730	<s825367>s865242<s825365<s825364<s825363	-0.0384063	0.0279156	17	45680084	-0.02869	0.132413	rs55974014	rs1864325	220377	0.98	45900461	MAPT
17	45582319	45582518	17	45585730	45585730	<s825367>s865242<s825365<s825364<s825363	-0.0384063	0.0279156	17	45680084	-0.02869	0.132413	rs55974014	rs17563986	233822	0.98	45913906	MAPT
17	45582319	45582518	17	45585730	45585730	<s825367>s865242<s825365<s825364<s825363	-0.0384063	0.0279156	17	45680084	-0.02869	0.132413	rs55974014	rs17563986	233822	0.98	45913906	MAPT
17	45582319	45582518	17	45585730	45585730	<s825367>s865242<s825365<s825364<s825363	-0.0384063	0.0279156	17	45680084	-0.02869	0.132413	rs55974014	rs17649553	237198	0.979	45917282	MAPT
17	45582319	45582518	17	45585730	45585730	<s825367>s865242<s825365<s825364<s825363	-0.0384063	0.0279156	17	45680084	-0.02869	0.132413	rs55974014	rs17649553	237198	0.979	45917282	ARHGAP27,CRHR1,KANSL1,SPPL2C,MAPT,STH
17	45582319	45582518	17	45585730	45585730	<s825367>s865242<s825365<s825364<s825363	-0.0384063	0.0279156	17	45680084	-0.02869	0.132413	rs55974014	rs17564829	249151	0.98	45929235	CRHR1,MAPT
17	45582319	45582518	17	45585730	45585730	<s825367>s865242<s825365<s825364<s825363	-0.0384063	0.0279156	17	45680084	-0.02869	0.132413	rs55974014	rs79857651	256025	0.98	45936109	NR
17	45582319	45582518	17	45585730	45585730	<s825367>s865242<s825365<s825364<s825363	-0.0384063	0.0279156	17	45680084	-0.02869	0.132413	rs55974014	rs12150229	257996	0.978	45938080	NR
17	45582319	45582518	17	45585730	45585730	<s825367>s865242<s825365<s825364<s825363	-0.0384063	0.0279156	17	45680084	-0.02869	0.132413	rs55974014	rs62061733	260949	0.971	45941033	NR
17	45582319	45582518	17	45585730	45585730	<s825367>s865242<s825365<s825364<s825363	-0.0384063	0.0279156	17	45680084	-0.02869	0.132413	rs55974014	rs62061733	260949	0.971	45941033	NA
17	45582319	45582518	17	45585730	45585730	<s825367>s865242<s825365<s825364<s825363	-0.0384063	0.0279156	17	45680084	-0.02869	0.132413	rs55974014	rs62061734	261038	0.973	45941122	NR
17	45582319	45582518	17	45585730	45585730	<s825367>s865242<s825365<s825364<s825363	-0.0384063	0.0279156	17	45680084	-0.02869	0.132413	rs55974014	rs62061734	261038	0.973	45941122	NA
17	45582319	45582518	17	45585730	45585730	<s825367>s865242<s825365<s825364<s825363	-0.0384063	0.0279156	17	45680084	-0.02869	0.132413	rs55974014	rs242559	268438	0.953	45948522	MAPT
17	45582319	45582518	17	45585730	45585730	<s825367>s865242<s825365<s825364<s825363	-0.0384063	0.0279156	17	45680084	-0.02869	0.132413	rs55974014	rs242559	268438	0.953	45948522	MAPT
17	45582319	45582518	17	45585730	45585730	<s825367>s865242<s825365<s825364<s825363	-0.0384063	0.0279156	17	45680084	-0.02869	0.132413	rs55974014	rs242559	268438	0.953	45948522	MAPT
17	45582319	45582518	17	45585730	45585730	<s825367>s865242<s825365<s825364<s825363	-0.0384063	0.0279156	17	45680084	-0.02869	0.132413	rs55974014	rs62062797	269916	0.976	45950000	NR
17	45582319	45582518	17	45585730	45585730	<s825367>s865242<s825365<s825364<s825363	-0.0384063	0.0279156	17	45680084	-0.02869	0.132413	rs55974014	rs17650842	280041	0.978	45960125	NR
17	45582319	45582518	17	45585730	45585730	<s825367>s865242<s825365<s825364<s825363	-0.0384063	0.0279156	17	45680084	-0.02869	0.132413	rs55974014	rs56280951	283657	0.976	45963741	ACBD4
17	45582319	45582518	17	45585730	45585730	<s825367>s865242<s825365<s825364<s825363	-0.0384063	0.0279156	17	45680084	-0.02869	0.132413	rs55974014	rs117124984	294138	0.966	45974222	NR
17	45582319	45582518	17	45585730	45585730	<s825367>s865242<s825365<s825364<s825363	-0.0384063	0.0279156	17	45680084	-0.02869	0.132413	rs55974014	rs118087478	294139	0.966	45974223	NR
17	45582319	45582518	17	45585730	45585730	<s825367>s865242<s825365<s825364<s825363	-0.0384063	0.0279156	17	45680084	-0.02869	0.132413	rs55974014	rs1981997	299317	0.98	45979401	MAPT
17	45582319	45582518	17	45585730	45585730	<s825367>s865242<s825365<s825364<s825363	-0.0384063	0.0279156	17	45680084	-0.02869	0.132413	rs55974014	rs3785884	300145	0.961	45980229	NR
17	45582319	45582518	17	45585730	45585730	<s825367>s865242<s825365<s825364<s825363	-0.0384063	0.0279156	17	45680084	-0.02869	0.132413	rs55974014	rs3785884	300145	0.961	45980229	NR
17	45582319	45582518	17	45585730	45585730	<s825367>s865242<s825365<s825364<s825363	-0.0384063	0.0279156	17	45680084	-0.02869	0.132413	rs55974014	rs62063786	303573	0.977	45983657	MAPT
17	45582319	45582518	17	45585730	45585730	<s825367>s865242<s825365<s825364<s825363	-0.0384063	0.0279156	17	45680084	-0.02869	0.132413	rs55974014	rs919462	308290	0.98	45988374	WNT3,MAPT,PLEKHM1
17	45582319	45582518	17	45585730	45585730	<s825367>s865242<s825365<s825364<s825363	-0.0384063	0.0279156	17	45680084	-0.02869	0.132413	rs55974014	rs112385572	308722	0.98	45988806	CRHR1,KANSL1,MAPT,PLEKHM1,SPPL2C,STH
17	45582319	45582518	17	45585730	45585730	<s825367>s865242<s825365<s825364<s825363	-0.0384063	0.0279156	17	45680084	-0.02869	0.132413	rs55974014	rs1052553	316439	0.979	45996523	Intergenic
17	45582319	45582518	17	45585730	45585730	<s825367>s865242<s825365<s825364<s825363	-0.0384063	0.0279156	17	45680084	-0.02869	0.132413	rs55974014	rs1052553	316439	0.979	45996523	MAPT
17	45582319	45582518	17	45585730	45585730	<s825367>s865242<s825365<s825364<s825363	-0.0384063	0.0279156	17	45680084	-0.02869	0.132413	rs55974014	rs1052553	316439	0.979	45996523	MAPT
17	45582319	45582518	17	45585730	45585730	<s825367>s865242<s825365<s825364<s825363	-0.0384063	0.0279156	17	45680084	-0.02869	0.132413	rs55974014	rs56108300	320401	0.977	46000485	NR
17	45582319	45582518	17	45585730	45585730	<s825367>s865242<s825365<s825364<s825363	-0.0384063	0.0279156	17	45680084	-0.02869	0.132413	rs55974014	rs8070723	323614	0.975	46003698	MAPT
17	45582319	45582518	17	45585730	45585730	<s825367>s865242<s825365<s825364<s825363	-0.0384063	0.0279156	17	45680084	-0.02869	0.132413	rs55974014	rs8070723	323614	0.975	46003698	MAPT
17	45582319	45582518	17	45585730	45585730	<s825367>s865242<s825365<s825364<s825363	-0.0384063	0.0279156	17	45680084	-0.02869	0.132413	rs55974014	rs8070723	323614	0.975	46003698	NR
17	45582319	45582518	17	45585730	45585730	<s825367>s865242<s825365<s825364<s825363	-0.0384063	0.0279156	17	45680084	-0.02869	0.132413	rs55974014	rs1991556	325952	0.966	46006036	STH
17	45582319	45582518	17	45585730	45585730	<s825367>s865242<s825365<s825364<s825363	-0.0384063	0.0279156	17	45680084	-0.02869	0.132413	rs55974014	rs1991556	325952	0.966	46006036	NA
17	45582319	45582518	17	45585730	45585730	<s825367>s865242<s825365<s825364<s825363	-0.0384063	0.0279156	17	45680084	-0.02869	0.132413	rs55974014	rs1991556	325952	0.966	46006036	MAPT,STH
17	45582319	45582518	17	45585730	45585730	<s825367>s865242<s825365<s825364<s825363	-0.0384063	0.0279156	17	45680084	-0.02869	0.132413	rs55974014	rs58879558	338017	0.955	46018101	NA
17	45582319	45582518	17	45585730	45585730	<s825367>s865242<s825365<s825364<s825363	-0.0384063	0.0279156	17	45680084	-0.02869	0.132413	rs55974014	rs58879558	338017	0.955	46018101	NR
17	45582319	45582518	17	45585730	45585730	<s825367>s865242<s825365<s825364<s825363	-0.0384063	0.0279156	17	45680084	-0.02869	0.132413	rs55974014	rs58879558	338017	0.955	46018101	NR
17	45582319	45582518	17	45585730	45585730	<s825367>s865242<s825365<s825364<s825363	-0.0384063	0.0279156	17	45680084	-0.02869	0.132413	rs55974014	rs58879558	338017	0.955	46018101	NR
17	45582319	45582518	17	45585730	45585730	<s825367>s865242<s825365<s825364<s825363	-0.0384063	0.0279156	17	45680084	-0.02869	0.132413	rs55974014	rs58879558	338017	0.955	46018101	NR
17	45582319	45582518	17	45585730	45585730	<s825367>s865242<s825365<s825364<s825363	-0.0384063	0.0279156	17	45680084	-0.02869	0.132413	rs55974014	rs58879558	338017	0.955	46018101	NR
17	45582319	45582518	17	45585730	45585730	<s825367>s865242<s825365<s825364<s825363	-0.0384063	0.0279156	17	45680084	-0.02869	0.132413	rs55974014	rs58879558	338017	0.955	46018101	MAPT
17	45582319	45582518	17	45585730	45585730	<s825367>s865242<s825365<s825364<s825363	-0.0384063	0.0279156	17	45680084	-0.02869	0.132413	rs55974014	rs58879558	338017	0.955	46018101	MAPT
17	45582319	45582518	17	45585730	45585730	<s825367>s865242<s825365<s825364<s825363	-0.0384063	0.0279156	17	45680084	-0.02869	0.132413	rs55974014	rs62062288	339103	0.951	46019187	NR
17	45582319	45582518	17	45585730	45585730	<s825367>s865242<s825365<s825364<s825363	-0.0384063	0.0279156	17	45680084	-0.02869	0.132413	rs55974014	rs62062288	339103	0.951	46019187	NR
17	45582319	45582518	17	45585730	45585730	<s825367>s865242<s825365<s825364<s825363	-0.0384063	0.0279156	17	45680084	-0.02869	0.132413	rs55974014	rs62062288	339103	0.951	46019187	STH
17	45582319	45582518	17	45585730	45585730	<s825367>s865242<s825365<s825364<s825363	-0.0384063	0.0279156	17	45680084	-0.02869	0.132413	rs55974014	rs62062288	339103	0.951	46019187	NR
17	45582319	45582518	17	45585730	45585730	<s825367>s865242<s825365<s825364<s825363	-0.0384063	0.0279156	17	45680084	-0.02869	0.132413	rs55974014	rs62062288	339103	0.951	46019187	MAPT
17	45582319	45582518	17	45585730	45585730	<s825367>s865242<s825365<s825364<s825363	-0.0384063	0.0279156	17	45680084	-0.02869	0.132413	rs55974014	rs62062288	339103	0.951	46019187	CRHR1,DND1P1,ENSG00000262372,ENSG00000262500,ENSG00000262881,KANSL1,MAPT,MAPT-AS1,NSF,PLEKHM1,SPPL2C,STH,RP11-105N13.4,WNT3
17	45582319	45582518	17	45585730	45585730	<s825367>s865242<s825365<s825364<s825363	-0.0384063	0.0279156	17	45680084	-0.02869	0.132413	rs55974014	rs62062288	339103	0.951	46019187	KANSL1
17	45582319	45582518	17	45585730	45585730	<s825367>s865242<s825365<s825364<s825363	-0.0384063	0.0279156	17	45680084	-0.02869	0.132413	rs55974014	rs62062288	339103	0.951	46019187	KANSL1
17	45582319	45582518	17	45585730	45585730	<s825367>s865242<s825365<s825364<s825363	-0.0384063	0.0279156	17	45680084	-0.02869	0.132413	rs55974014	rs62062288	339103	0.951	46019187	NR
17	45582319	45582518	17	45585730	45585730	<s825367>s865242<s825365<s825364<s825363	-0.0384063	0.0279156	17	45680084	-0.02869	0.132413	rs55974014	rs62062288	339103	0.951	46019187	MAPT
17	45582319	45582518	17	45585730	45585730	<s825367>s865242<s825365<s825364<s825363	-0.0384063	0.0279156	17	45680084	-0.02869	0.132413	rs55974014	rs17652520	341517	0.964	46021601	intergenic
17	45582319	45582518	17	45585730	45585730	<s825367>s865242<s825365<s825364<s825363	-0.0384063	0.0279156	17	45680084	-0.02869	0.132413	rs55974014	rs17652520	341517	0.964	46021601	NA
17	45582319	45582518	17	45585730	45585730	<s825367>s865242<s825365<s825364<s825363	-0.0384063	0.0279156	17	45680084	-0.02869	0.132413	rs55974014	rs17652520	341517	0.964	46021601	MAPT
17	45582319	45582518	17	45585730	45585730	<s825367>s865242<s825365<s825364<s825363	-0.0384063	0.0279156	17	45680084	-0.02869	0.132413	rs55974014	rs17652520	341517	0.964	46021601	MAPT
17	45582319	45582518	17	45585730	45585730	<s825367>s865242<s825365<s825364<s825363	-0.0384063	0.0279156	17	45680084	-0.02869	0.132413	rs55974014	rs112333322	369223	0.978	46049307	NR
17	45582319	45582518	17	45585730	45585730	<s825367>s865242<s825365<s825364<s825363	-0.0384063	0.0279156	17	45680084	-0.02869	0.132413	rs55974014	rs974295	392702	0.98	46072786	KANSL1
17	45582319	45582518	17	45585730	45585730	<s825367>s865242<s825365<s825364<s825363	-0.0384063	0.0279156	17	45680084	-0.02869	0.132413	rs55974014	rs8080583	405147	0.966	46085231	KANSL1
17	45582319	45582518	17	45585730	45585730	<s825367>s865242<s825365<s825364<s825363	-0.0384063	0.0279156	17	45680084	-0.02869	0.132413	rs55974014	rs55692232	406873	0.98	46086957	NR
17	45582319	45582518	17	45585730	45585730	<s825367>s865242<s825365<s825364<s825363	-0.0384063	0.0279156	17	45680084	-0.02869	0.132413	rs55974014	rs111676341	425953	0.979	46106037	NR
17	45582319	45582518	17	45585730	45585730	<s825367>s865242<s825365<s825364<s825363	-0.0384063	0.0279156	17	45680084	-0.02869	0.132413	rs55974014	rs16940904	428613	0.964	46108697	NA
17	45582319	45582518	17	45585730	45585730	<s825367>s865242<s825365<s825364<s825363	-0.0384063	0.0279156	17	45680084	-0.02869	0.132413	rs55974014	rs16940904	428613	0.964	46108697	NA
17	45582319	45582518	17	45585730	45585730	<s825367>s865242<s825365<s825364<s825363	-0.0384063	0.0279156	17	45680084	-0.02869	0.132413	rs55974014	rs16940904	428613	0.964	46108697	NA
17	45582319	45582518	17	45585730	45585730	<s825367>s865242<s825365<s825364<s825363	-0.0384063	0.0279156	17	45680084	-0.02869	0.132413	rs55974014	rs16940904	428613	0.964	46108697	NA
17	45582319	45582518	17	45585730	45585730	<s825367>s865242<s825365<s825364<s825363	-0.0384063	0.0279156	17	45680084	-0.02869	0.132413	rs55974014	rs9303525	429807	0.966	46109891	MAPT,GRN,CRHR1,STH
17	45582319	45582518	17	45585730	45585730	<s825367>s865242<s825365<s825364<s825363	-0.0384063	0.0279156	17	45680084	-0.02869	0.132413	rs55974014	rs17577094	430042	0.98	46110126	MAPT
17	45582319	45582518	17	45585730	45585730	<s825367>s865242<s825365<s825364<s825363	-0.0384063	0.0279156	17	45680084	-0.02869	0.132413	rs55974014	rs76640332	432408	0.977	46112492	KANSL1
17	45582319	45582518	17	45585730	45585730	<s825367>s865242<s825365<s825364<s825363	-0.0384063	0.0279156	17	45680084	-0.02869	0.132413	rs55974014	rs78929339	432460	0.979	46112544	NA
17	45582319	45582518	17	45585730	45585730	<s825367>s865242<s825365<s825364<s825363	-0.0384063	0.0279156	17	45680084	-0.02869	0.132413	rs55974014	rs4606752	435168	0.98	46115252	KANSL1
17	45582319	45582518	17	45585730	45585730	<s825367>s865242<s825365<s825364<s825363	-0.0384063	0.0279156	17	45680084	-0.02869	0.132413	rs55974014	rs4606752	435168	0.98	46115252	KANSL1
17	45582319	45582518	17	45585730	45585730	<s825367>s865242<s825365<s825364<s825363	-0.0384063	0.0279156	17	45680084	-0.02869	0.132413	rs55974014	rs17577369	435473	0.976	46115557	NR
17	45582319	45582518	17	45585730	45585730	<s825367>s865242<s825365<s825364<s825363	-0.0384063	0.0279156	17	45680084	-0.02869	0.132413	rs55974014	rs17661015	435507	0.975	46115591	NR
17	45582319	45582518	17	45585730	45585730	<s825367>s865242<s825365<s825364<s825363	-0.0384063	0.0279156	17	45680084	-0.02869	0.132413	rs55974014	rs17661015	435507	0.975	46115591	NR
17	45582319	45582518	17	45585730	45585730	<s825367>s865242<s825365<s825364<s825363	-0.0384063	0.0279156	17	45680084	-0.02869	0.132413	rs55974014	rs4471723	448240	0.968	46128324	NR
17	45582319	45582518	17	45585730	45585730	<s825367>s865242<s825365<s825364<s825363	-0.0384063	0.0279156	17	45680084	-0.02869	0.132413	rs55974014	rs79301522	450482	0.979	46130566	NR
17	45582319	45582518	17	45585730	45585730	<s825367>s865242<s825365<s825364<s825363	-0.0384063	0.0279156	17	45680084	-0.02869	0.132413	rs55974014	rs1881193	491319	0.979	46171403	NR
17	45582319	45582518	17	45585730	45585730	<s825367>s865242<s825365<s825364<s825363	-0.0384063	0.0279156	17	45680084	-0.02869	0.132413	rs55974014	rs2732596	512096	0.972	46192180	KANSL1
17	45582319	45582518	17	45585730	45585730	<s825367>s865242<s825365<s825364<s825363	-0.0384063	0.0279156	17	45680084	-0.02869	0.132413	rs55974014	rs2696457	526607	0.972	46206691	NR
17	45582319	45582518	17	45585730	45585730	<s825367>s865242<s825365<s825364<s825363	-0.0384063	0.0279156	17	45680084	-0.02869	0.132413	rs55974014	rs2469933	528081	0.972	46208165	KIAA1267
17	45582319	45582518	17	45585730	45585730	<s825367>s865242<s825365<s825364<s825363	-0.0384063	0.0279156	17	45680084	-0.02869	0.132413	rs55974014	rs2532386	556307	0.972	46236391	KANSL1,LRRC37A
17	45582319	45582518	17	45585730	45585730	<s825367>s865242<s825365<s825364<s825363	-0.0384063	0.0279156	17	45680084	-0.02869	0.132413	rs55974014	rs2696668	560734	0.97	46240818	NR
17	45582319	45582518	17	45585730	45585730	<s825367>s865242<s825365<s825364<s825363	-0.0384063	0.0279156	17	45680084	-0.02869	0.132413	rs55974014	rs2732650	587538	0.975	46267622	RP11-259G18.1
17	45582319	45582518	17	45585730	45585730	<s825367>s865242<s825365<s825364<s825363	-0.0384063	0.0279156	17	45680084	-0.02869	0.132413	rs55974014	rs2696557	589768	0.971	46269852	NR
17	45582319	45582518	17	45585730	45585730	<s825367>s865242<s825365<s825364<s825363	-0.0384063	0.0279156	17	45680084	-0.02869	0.132413	rs55974014	rs2732708	593937	0.972	46274021	intergenic
17	45582319	45582518	17	45585730	45585730	<s825367>s865242<s825365<s825364<s825363	-0.0384063	0.0279156	17	45680084	-0.02869	0.132413	rs55974014	rs2732708	593937	0.972	46274021	NR
17	45582319	45582518	17	45585730	45585730	<s825367>s865242<s825365<s825364<s825363	-0.0384063	0.0279156	17	45680084	-0.02869	0.132413	rs55974014	rs2732706	594236	0.971	46274320	NA
17	45582319	45582518	17	45585730	45585730	<s825367>s865242<s825365<s825364<s825363	-0.0384063	0.0279156	17	45680084	-0.02869	0.132413	rs55974014	rs2261201	597099	0.969	46277183	NR
17	45582319	45582518	17	45585730	45585730	<s825367>s865242<s825365<s825364<s825363	-0.0384063	0.0279156	17	45680084	-0.02869	0.132413	rs55974014	rs2696532	598152	0.966	46278236	NR
17	45582319	45582518	17	45585730	45585730	<s825367>s865242<s825365<s825364<s825363	-0.0384063	0.0279156	17	45680084	-0.02869	0.132413	rs55974014	rs2696524	599343	0.969	46279427	NR
17	45582319	45582518	17	45585730	45585730	<s825367>s865242<s825365<s825364<s825363	-0.0384063	0.0279156	17	45680084	-0.02869	0.132413	rs55974014	rs17665188	599901	0.969	46279985	NR
17	45582319	45582518	17	45585730	45585730	<s825367>s865242<s825365<s825364<s825363	-0.0384063	0.0279156	17	45680084	-0.02869	0.132413	rs55974014	rs2696500	606479	0.969	46286563	NR
17	45582319	45582518	17	45585730	45585730	<s825367>s865242<s825365<s825364<s825363	-0.0384063	0.0279156	17	45680084	-0.02869	0.132413	rs55974014	rs2696497	607199	0.969	46287283	NR
1	192124389	192124588	1	192121765	192122898	>s39739	0.0253978	0.0283609	1	192065058	-0.01834	1	rs78292779	rs17403780	94400	0.972	191970658	NR
1	192124389	192124588	1	192121765	192122898	>s39739	0.0253978	0.0283609	1	192065058	-0.01834	1	rs78292779	rs17403780	94400	0.972	191970658	NR
1	192124389	192124588	1	192121765	192122898	>s39739	0.0253978	0.0283609	1	192065058	-0.01834	1	rs78292779	rs17403780	94400	0.972	191970658	NR
11	55271026	55271225	11	55264127	55271068	*	-0.0986074	0.0283953	11	55176661	-0.09691	1	rs11227595	rs11228868	76333	1	55252994	NR
11	55271026	55271225	11	55264127	55271068	*	-0.0986074	0.0283953	11	55176661	-0.09691	1	rs11227595	rs11229654	260665	0.996	55437326	NR
11	55271026	55271225	11	55264127	55271068	*	-0.0986074	0.0283953	11	55176661	-0.09691	1	rs11227595	rs11229691	268097	0.996	55444758	NR
20	56684665	56684864	20	56678439	56679545	>s574372	-0.0446272	0.0287428	20	56620606	0.03855	1	rs34128536	rs6014781	198	0.996	56620408	NA
1	42549335	42549534	1	42542561	42542865	>s10309	0.0181439	0.0287837	1	42491149	-0.01611	1	rs72659925	rs72659998	80736	0.99	42571885	CCDC30
11	74013070	74013269	11	74005566	74005625	>s363276	-0.0149976	0.0288754	11	73927813	0.0115	1	rs11235951	rs72982960	29694	0.98	73957507	NA
17	60011670	60011869	17	60016567	60016587	>s508820	0.02733	0.028942	17	59974763	-0.0192	1	rs143669204	rs143669204	0	1	59974763	NA
5	57992324	57992386	5	57983695	57983695	*	0.0332845	0.0289625	5	58082045	0.02789	1	rs34810059	rs34810059	0	1	58082045	PGAM1P1
11	64310231	64310430	11	64308534	64308534	*	0.0232668	0.029054	11	64220573	-0.0193	1	rs3802932	rs11231711	58830	0.972	64161743	NA
11	64310231	64310430	11	64308534	64308534	*	0.0232668	0.029054	11	64220573	-0.0193	1	rs3802932	rs11231711	58830	0.972	64161743	NA
11	64310231	64310430	11	64308534	64308534	*	0.0232668	0.029054	11	64220573	-0.0193	1	rs3802932	rs11231711	58830	0.972	64161743	NA
11	64310231	64310430	11	64308534	64308534	*	0.0232668	0.029054	11	64220573	-0.0193	1	rs3802932	rs3802932	0	1	64220573	FERMT3
11	64310231	64310430	11	64308534	64308534	*	0.0232668	0.029054	11	64220573	-0.0193	1	rs3802932	rs3802932	0	1	64220573	FERMT3
11	64310231	64310430	11	64308534	64308534	*	0.0232668	0.029054	11	64220573	-0.0193	1	rs3802932	rs3802932	0	1	64220573	NA
7	15530678	15530693	7	15530336	15530464	>s197987	0.0261984	0.02925	7	15479406	-0.02558	1	rs7801090	rs7789097	10895	0.982	15468511	AGMO
1	104178781	104178980	1	104177238	104177555	*	-0.053785	0.0292654	1	104180409	-0.04083	1	rs34317481	rs12756615	11320	0.985	104169089	NR
17	43943805	43943851	17	43939956	43939956	*	0.0514656	0.0294132	17	43983845	-0.04664	1	rs1731892	rs2631288	3276	0.993	43980569	PYY
2	173743097	173743296	2	173737954	173737964	>s76588	0.0396049	0.0294218	2	173646345	0.02003	1	rs13033812	rs13028485	6149	0.999	173640196	NR
1	35717444	35717643	1	35709123	35709177	>s9519	0.0424714	0.0295383	1	35773633	0.03123	1	rs11264203	rs12083902	35878	0.993	35809511	NR
1	35717444	35717643	1	35709123	35709177	>s9519	0.0424714	0.0295383	1	35773633	0.03123	1	rs11264203	rs11264213	44720	0.993	35818353	NR
2	220539186	220539385	2	220547667	220547668	>s80526	0.0424407	0.0295673	2	220523408	0.03593	1	rs28691680	rs13414440	34965	0.973	220558373	NR
12	122820360	122820559	12	122822674	122822680	<s734591	0.0561491	0.0295744	12	122831557	0.04618	1	rs59922385	rs77422670	27791	0.977	122803766	NR
12	122820360	122820559	12	122822674	122822680	<s734591	0.0561491	0.0295744	12	122831557	0.04618	1	rs59922385	rs77422670	27791	0.977	122803766	NR
12	122820360	122820559	12	122822674	122822680	<s734591	0.0561491	0.0295744	12	122831557	0.04618	1	rs59922385	rs111589530	1152	0.988	122830405	NR
20	31184585	31184784	20	31184441	31184610	>s570822>s570823>s570824>s570825	0.0262518	0.0300045	20	31268950	-0.0202	1	rs73119542	rs138243157	64102	0.963	31333052	NA
17	45052529	45052728	17	45051879	45051879	>s679603	0.0361764	0.0302223	17	45127896	-0.02721	1	rs117873694	rs739454	10058	0.995	45117838	PLCD3
1	120065739	120065938	1	120069442	120069654	>s17474	0.0191586	0.0302748	1	119988510	-0.003862	1	rs1493698	rs2793827	82328	0.977	119906182	NA
1	120065739	120065938	1	120069442	120069654	>s17474	0.0191586	0.0302748	1	119988510	-0.003862	1	rs1493698	rs835574	67903	0.974	119920607	NR
1	120065739	120065938	1	120069442	120069654	>s17474	0.0191586	0.0302748	1	119988510	-0.003862	1	rs1493698	rs835574	67903	0.974	119920607	NA
1	120065739	120065938	1	120069442	120069654	>s17474	0.0191586	0.0302748	1	119988510	-0.003862	1	rs1493698	rs835574	67903	0.974	119920607	NA
1	120065739	120065938	1	120069442	120069654	>s17474	0.0191586	0.0302748	1	119988510	-0.003862	1	rs1493698	rs835573	66968	0.982	119921542	NOTCH2
1	120065739	120065938	1	120069442	120069654	>s17474	0.0191586	0.0302748	1	119988510	-0.003862	1	rs1493698	rs1493696	25601	0.994	119962909	NOTCH2
1	120065739	120065938	1	120069442	120069654	>s17474	0.0191586	0.0302748	1	119988510	-0.003862	1	rs1493698	rs10923929	25137	0.987	119963373	NR
1	120065739	120065938	1	120069442	120069654	>s17474	0.0191586	0.0302748	1	119988510	-0.003862	1	rs1493698	rs10923929	25137	0.987	119963373	NA
1	120065739	120065938	1	120069442	120069654	>s17474	0.0191586	0.0302748	1	119988510	-0.003862	1	rs1493698	rs2453042	2201	0.994	119986309	NOTCH2
1	120065739	120065938	1	120069442	120069654	>s17474	0.0191586	0.0302748	1	119988510	-0.003862	1	rs1493698	rs2453042	2201	0.994	119986309	NOTCH2
13	113239150	113239349	13	113232218	113232275	<s715669<s715668<s715667<s770505<s715665<s715664>s417977>s806793>s417979	-0.020136	0.0304341	13	113158648	-0.01708	1	rs2273971	rs2273971	0	1	113158648	PROZ
11	54827760	54827793	11	54828608	54830843	>s360394	-0.0294222	0.0308554	11	54742266	0.02626	1	rs55835312	rs10902298	138302	0.994	54880568	OR4A5
10	94758274	94758473	10	94754642	94758573	>s341854	0.0418051	0.0309185	10	94764638	-0.02375	1	rs58667319	rs58667319	0	1	94764638	NR
14	103602151	103602350	14	103610882	103611277	>s444140	0.0518385	0.0311094	14	103667193	0.04361	1	rs151199076	rs151199076	0	1	103667193	NA
21	45940887	45941086	21	45931926	45931926	*	-0.017171	0.0311094	21	46023567	-0.01037	1	rs35928809	rs9977276	7154	0.98	46016413	COL6A1
21	45940887	45941086	21	45931926	45931926	*	-0.017171	0.0311094	21	46023567	-0.01037	1	rs35928809	rs9977276	7154	0.98	46016413	COL6A1
10	124467788	124467987	10	124469404	124469457	>s344959	-0.02357	0.031513	10	124552301	0.02171	1	rs34328971	rs12251637	3293	0.986	124549008	NR
10	124467788	124467987	10	124469404	124469457	>s344959	-0.02357	0.031513	10	124552301	0.02171	1	rs34328971	rs35936514	4100	0.986	124556401	NR
11	65522423	65522622	11	65520061	65520118	>s361814	0.0413739	0.0315894	11	65569348	-0.03424	1	rs3782089	rs3782089	0	1	65569348	SSSCA1
1	11890697	11890896	1	11894417	11894417	*	0.0385038	0.0316242	1	11797469	0.03849	1	rs6541006	rs6541006	0	1	11797469	MTHFR,CLCN6
1	11890697	11890896	1	11894417	11894417	*	0.0385038	0.0316242	1	11797469	0.03849	1	rs6541006	rs6541006	0	1	11797469	MTHFR,CLCN6
1	11890697	11890896	1	11894417	11894417	*	0.0385038	0.0316242	1	11797469	0.03849	1	rs6541006	rs6541006	0	1	11797469	MTHFR,CLCN6
1	11890697	11890896	1	11894417	11894417	*	0.0385038	0.0316242	1	11797469	0.03849	1	rs6541006	rs6541006	0	1	11797469	MTHFR,CLCN6
1	11890697	11890896	1	11894417	11894417	*	0.0385038	0.0316242	1	11797469	0.03849	1	rs6541006	rs6541006	0	1	11797469	MTHFR,CLCN6
1	11890697	11890896	1	11894417	11894417	*	0.0385038	0.0316242	1	11797469	0.03849	1	rs6541006	rs6541006	0	1	11797469	MTHFR,CLCN6
1	11890697	11890896	1	11894417	11894417	*	0.0385038	0.0316242	1	11797469	0.03849	1	rs6541006	rs6541006	0	1	11797469	MTHFR,CLCN6
1	11890697	11890896	1	11894417	11894417	*	0.0385038	0.0316242	1	11797469	0.03849	1	rs6541006	rs6541006	0	1	11797469	MTHFR,CLCN6
1	11890697	11890896	1	11894417	11894417	*	0.0385038	0.0316242	1	11797469	0.03849	1	rs6541006	rs13306567	2939	0.993	11800408	NR
1	11890697	11890896	1	11894417	11894417	*	0.0385038	0.0316242	1	11797469	0.03849	1	rs6541006	rs74053327	38141	0.975	11835610	CLCN6
12	109850741	109850940	12	109859643	109859643	*	0.0456795	0.0316373	12	109757295	0.03878	0.593247	rs10774883	rs734152	2676	0.979	109759971	FAM222A-AS1
12	9221390	9221486	12	9221390	9221418	>s766654<s1072690>s766656	-0.0247469	0.0316587	12	9235414	-0.0201	0.261261	rs17804080	rs57961998	9781	0.997	9225633	NR
12	9221390	9221486	12	9221390	9221418	>s766654<s1072690>s766656	-0.0247469	0.0316587	12	9235414	-0.0201	0.261261	rs17804080	rs73057767	7892	0.997	9227522	NR
12	9221390	9221486	12	9221390	9221418	>s766654<s1072690>s766656	-0.0247469	0.0316587	12	9235414	-0.0201	0.261261	rs17804080	rs73057770	7873	0.997	9227541	NR
12	9221390	9221486	12	9221390	9221418	>s766654<s1072690>s766656	-0.0247469	0.0316587	12	9235414	-0.0201	0.261261	rs17804080	rs67775007	6936	0.997	9228478	NR
12	9221390	9221486	12	9221390	9221418	>s766654<s1072690>s766656	-0.0247469	0.0316587	12	9235414	-0.0201	0.261261	rs17804080	rs73251320	4472	0.998	9230942	NR
12	9221390	9221486	12	9221390	9221418	>s766654<s1072690>s766656	-0.0247469	0.0316587	12	9235414	-0.0201	0.261261	rs17804080	rs67033239	4074	0.998	9231340	NR
12	9221390	9221486	12	9221390	9221418	>s766654<s1072690>s766656	-0.0247469	0.0316587	12	9235414	-0.0201	0.261261	rs17804080	rs16918212	3052	0.998	9232362	NR
12	9221390	9221486	12	9221390	9221418	>s766654<s1072690>s766656	-0.0247469	0.0316587	12	9235414	-0.0201	0.261261	rs17804080	rs17804080	0	1	9235414	NR
12	9221390	9221486	12	9221390	9221418	>s766654<s1072690>s766656	-0.0247469	0.0316587	12	9235414	-0.0201	0.261261	rs17804080	rs17804080	0	1	9235414	NR
15	28353440	28353639	15	28351314	28351377	*	0.0241844	0.031748	15	28269134	0.01755	1	rs2240201	rs75165924	134022	0.968	28135112	HERC2
15	28353440	28353639	15	28351314	28351377	*	0.0241844	0.031748	15	28269134	0.01755	1	rs2240201	rs8028689	25392	0.996	28243742	NR
15	28353440	28353639	15	28351314	28351377	*	0.0241844	0.031748	15	28269134	0.01755	1	rs2240201	rs79097182	2283	0.992	28266851	HERC2
15	28353440	28353639	15	28351314	28351377	*	0.0241844	0.031748	15	28269134	0.01755	1	rs2240201	rs79097182	2283	0.992	28266851	HERC2
15	28353440	28353639	15	28351314	28351377	*	0.0241844	0.031748	15	28269134	0.01755	1	rs2240201	rs79097182	2283	0.992	28266851	HERC2
7	98007260	98007459	7	98004012	98004075	<s704688<s704686	-0.0511757	0.0323945	7	97988346	-0.02664	1	rs13242307	rs13438327	3033	0.987	97991379	OCM2
12	111701279	111701478	12	111697912	111697972	>s385758	-0.0336121	0.0324989	12	111779334	0.01547	1	rs11613713	rs77684561	155415	0.985	111623919	BRAP,ALDH2,MAKKAPK5
12	111701279	111701478	12	111697912	111697972	>s385758	-0.0336121	0.0324989	12	111779334	0.01547	1	rs11613713	rs77684561	155415	0.985	111623919	BRAP,ALDH2,MAKKAPK5
12	111701279	111701478	12	111697912	111697972	>s385758	-0.0336121	0.0324989	12	111779334	0.01547	1	rs11613713	rs847895	98562	0.99	111680772	NR
12	111701279	111701478	12	111697912	111697972	>s385758	-0.0336121	0.0324989	12	111779334	0.01547	1	rs11613713	rs630616	58172	0.995	111721162	ACAD10
12	111701279	111701478	12	111697912	111697972	>s385758	-0.0336121	0.0324989	12	111779334	0.01547	1	rs11613713	rs6490294	26700	0.971	111752634	ACAD10
12	111701279	111701478	12	111697912	111697972	>s385758	-0.0336121	0.0324989	12	111779334	0.01547	1	rs11613713	rs6490294	26700	0.971	111752634	NR
12	111701279	111701478	12	111697912	111697972	>s385758	-0.0336121	0.0324989	12	111779334	0.01547	1	rs11613713	rs9971942	38904	0.966	111818238	NR
12	111701279	111701478	12	111697912	111697972	>s385758	-0.0336121	0.0324989	12	111779334	0.01547	1	rs11613713	rs7294902	137393	0.971	111916727	TMEM116
12	111701279	111701478	12	111697912	111697972	>s385758	-0.0336121	0.0324989	12	111779334	0.01547	1	rs11613713	rs3752630	158852	0.968	111938186	TMEM116
12	111701279	111701478	12	111697912	111697972	>s385758	-0.0336121	0.0324989	12	111779334	0.01547	1	rs11613713	rs4767264	208608	0.951	111987942	NR
12	111701279	111701478	12	111697912	111697972	>s385758	-0.0336121	0.0324989	12	111779334	0.01547	1	rs11613713	rs7978068	284628	0.953	112063962	NR
11	54538976	54539175	11	54541605	54541837	>s771486	-0.0320497	0.0325322	11	54619174	-0.01877	1	rs56359306	rs1391576	105174	0.998	54724348	OR4A5
11	55250627	55250826	11	55258234	55259598	>s360560	0.0418954	0.0325709	11	55155480	-0.02062	1	rs79215256	rs117339203	60688	0.97	55094792	NA
3	48913794	48913993	3	48907666	48908773	>s90656	0.0187401	0.0326553	3	48828880	0.01103	1	rs144519232	rs113011189	383694	0.963	49212574	NR
3	48913794	48913993	3	48907666	48908773	>s90656	0.0187401	0.0326553	3	48828880	0.01103	1	rs144519232	rs113011189	383694	0.963	49212574	NR
20	34249313	34249512	20	34243491	34243491	*	0.038809	0.0326572	20	34197251	-0.03473	1	rs74569502	rs6087561	1230	0.984	34196021	NR
2	143245607	143245806	2	143253217	143253217	>s795395	0.0526329	0.0327515	2	143189958	0.04546	1	rs17811194	rs35713119	828	0.997	143190786	NA
2	143245607	143245806	2	143253217	143253217	>s795395	0.0526329	0.0327515	2	143189958	0.04546	1	rs17811194	rs62171698	11569	0.998	143201527	NA
2	143245607	143245806	2	143253217	143253217	>s795395	0.0526329	0.0327515	2	143189958	0.04546	1	rs17811194	rs62171698	11569	0.998	143201527	NR
2	143245607	143245806	2	143253217	143253217	>s795395	0.0526329	0.0327515	2	143189958	0.04546	1	rs17811194	rs62171698	11569	0.998	143201527	ARHGAP15
2	143245607	143245806	2	143253217	143253217	>s795395	0.0526329	0.0327515	2	143189958	0.04546	1	rs17811194	rs6710871	13066	1	143203024	NR
2	143245607	143245806	2	143253217	143253217	>s795395	0.0526329	0.0327515	2	143189958	0.04546	1	rs17811194	rs6710871	13066	1	143203024	NA
2	143245607	143245806	2	143253217	143253217	>s795395	0.0526329	0.0327515	2	143189958	0.04546	1	rs17811194	rs1376749	19865	1	143209823	NA
1	158763917	158764116	1	158757159	158758243	*	-0.0474165	0.0328473	1	158750954	-0.04252	1	rs16840940	rs75391812	18590	0.967	158732364	NA
22	31569367	31569566	22	31575116	31575177	>s633115	0.0456365	0.0329591	22	31575272	0.03883	1	rs5753700	rs16989760	19450	0.99	31555822	PISD,SFI1
22	31569367	31569566	22	31575116	31575177	>s633115	0.0456365	0.0329591	22	31575272	0.03883	1	rs5753700	rs55728055	122010	0.977	31697282	C22orf30
16	16006111	16006310	16	16003812	16003848	>s477264>s1596106>s477271	-0.151146	0.0329793	16	16101400	-0.1476	1	rs79686715	rs79686715	0	1	16101400	ABCC1
1	21210336	21210535	1	21202127	21202232	>s7540	0.0237491	0.0330542	1	21306718	0.02274	1	rs74698898	rs74698898	0	1	21306718	ECE1
4	930328	930527	4	928771	928821	>s114556	0.0321487	0.0331219	4	1003700	0.01953	1	rs2305489	rs2305489	0	1	1003700	IDUA
22	41935874	41935940	22	41937630	41937718	>s634656	-0.0304996	0.0331836	22	41981874	-0.02542	1	rs2269665	rs2269665	0	1	41981874	NA
7	158998821	158999020	7	159007059	159007059	*	0.0282847	0.0332316	7	158965920	0.02021	1	rs2730276	rs2730276	0	1	158965920	NR
1	75546559	75546758	1	75539272	75539453	>s13411	0.0274769	0.0332427	1	75566985	0.02154	1	rs79124267	rs79124267	0	1	75566985	NR
16	18747265	18747359	16	18750763	18750817	*	0.0211173	0.0333028	16	18841531	-0.009258	1	rs36121165	rs3751745	34891	0.995	18806640	SMG1
16	18747265	18747359	16	18750763	18750817	*	0.0211173	0.0333028	16	18841531	-0.009258	1	rs36121165	rs71382583	81871	0.994	18923402	NA
3	50084727	50084786	3	50084279	50084589	*	-0.0177369	0.0333258	3	50006881	-0.01758	0.466325	rs111401003	rs6797500	147696	0.989	49859185	CAMKV
3	50084727	50084786	3	50084279	50084589	*	-0.0177369	0.0333258	3	50006881	-0.01758	0.466325	rs111401003	rs11916261	29818	0.994	49977063	NR
3	50084727	50084786	3	50084279	50084589	*	-0.0177369	0.0333258	3	50006881	-0.01758	0.466325	rs111401003	rs11916261	29818	0.994	49977063	NR
3	50084727	50084786	3	50084279	50084589	*	-0.0177369	0.0333258	3	50006881	-0.01758	0.466325	rs111401003	rs62263597	87377	1	50094258	NA
3	50084727	50084786	3	50084279	50084589	*	-0.0177369	0.0333258	3	50006881	-0.01758	0.466325	rs111401003	rs62260771	121249	1	50128130	RBM5,SEMA3F
17	45448087	45448286	17	45449319	45449384	>s507380	0.0552023	0.0333823	17	45425494	0.0479	1	rs117905481	rs151184436	47726	0.98	45473220	NR
12	50149309	50149508	12	50156438	50156438	*	0.0235021	0.0333969	12	50165191	-0.01429	1	rs12824125	rs836179	55892	0.969	50109299	GPD1
12	50149309	50149508	12	50156438	50156438	*	0.0235021	0.0333969	12	50165191	-0.01429	1	rs12824125	rs836180	55705	0.97	50109486	GPD1
12	50149309	50149508	12	50156438	50156438	*	0.0235021	0.0333969	12	50165191	-0.01429	1	rs12824125	rs10747570	49037	0.982	50116154	COX14
12	50149309	50149508	12	50156438	50156438	*	0.0235021	0.0333969	12	50165191	-0.01429	1	rs12824125	rs10747570	49037	0.982	50116154	COX14
12	50149309	50149508	12	50156438	50156438	*	0.0235021	0.0333969	12	50165191	-0.01429	1	rs12824125	rs10747570	49037	0.982	50116154	COX14
12	50149309	50149508	12	50156438	50156438	*	0.0235021	0.0333969	12	50165191	-0.01429	1	rs12824125	rs10747570	49037	0.982	50116154	COX14
12	50149309	50149508	12	50156438	50156438	*	0.0235021	0.0333969	12	50165191	-0.01429	1	rs12824125	rs10747570	49037	0.982	50116154	COX14
12	50149309	50149508	12	50156438	50156438	*	0.0235021	0.0333969	12	50165191	-0.01429	1	rs12824125	rs10747570	49037	0.982	50116154	COX14
12	50149309	50149508	12	50156438	50156438	*	0.0235021	0.0333969	12	50165191	-0.01429	1	rs12824125	rs10747570	49037	0.982	50116154	C12orf62
12	50149309	50149508	12	50156438	50156438	*	0.0235021	0.0333969	12	50165191	-0.01429	1	rs12824125	rs11169294	3024	0.998	50168215	CERS5
12	50149309	50149508	12	50156438	50156438	*	0.0235021	0.0333969	12	50165191	-0.01429	1	rs12824125	rs4883481	15337	0.99	50180528	NA
12	50149309	50149508	12	50156438	50156438	*	0.0235021	0.0333969	12	50165191	-0.01429	1	rs12824125	rs4883482	17943	0.99	50183134	NA
10	48683041	48683240	10	48676783	48676835	>s337695	0.0191728	0.0334613	10	48725929	0.01153	1	rs7072606	rs7072606	0	1	48725929	NR
4	1310245	1310444	4	1314616	1314700	>s114811	-0.0216594	0.0335064	4	1250628	0.01787	1	rs1732115	rs1250129	10514	0.998	1261142	MAEA
4	169334498	169334697	4	169331449	169333166	>s137240>s137241>s137242>s137243>s137244	0.0259464	0.0335159	4	169342292	-0.02138	0.0351344	rs4535301	rs4535301	0	1	169342292	NEK1,SH3RF1,RPL6P12
8	143557065	143557264	8	143557434	143557435	>s243047<s1107856>s243048>s243049>s243050>s243051>s243052	0.0481613	0.0335512	8	143582517	0.04675	1	rs34178175	rs3793371	388	0.999	143582129	NR
2	118300473	118300672	2	118302833	118302847	>s71252	0.0306139	0.0336197	2	118379068	-0.02595	1	rs111630055	rs6542457	18228	0.993	118397296	EN1
2	218977025	218977224	2	218972070	218972127	>s80374>s80375	0.0400167	0.0336389	2	218915189	0.03412	1	rs77157375	rs77157375	0	1	218915189	LINC01494
2	218977025	218977224	2	218972070	218972127	>s80374>s80375	0.0400167	0.0336389	2	218915189	0.03412	1	rs77157375	rs77157375	0	1	218915189	NR
2	218977025	218977224	2	218972070	218972127	>s80374>s80375	0.0400167	0.0336389	2	218915189	0.03412	1	rs77157375	rs188488867	4345	0.995	218919534	LINC01494
19	30117354	30117553	19	30113644	30113719	>s545529	0.0300242	0.0336603	19	30050351	-0.01808	1	rs277099	rs6509942	13693	0.985	30064044	NR
1	8346362	8346561	1	8338652	8338709	>s5369	0.0285456	0.0337957	1	8314193	0.02102	1	rs72635790	rs72635790	0	1	8314193	NA
10	57532021	57532220	10	57536935	57537252	*	-0.0302308	0.0341234	10	57607636	0.0268	1	rs34674354	rs140265971	55493	0.971	57552143	Intergenic
10	57532021	57532220	10	57536935	57537252	*	-0.0302308	0.0341234	10	57607636	0.0268	1	rs34674354	rs72796654	11452	0.996	57596184	Intergenic
10	57532021	57532220	10	57536935	57537252	*	-0.0302308	0.0341234	10	57607636	0.0268	1	rs34674354	rs34674354	0	1	57607636	Intergenic
5	573274	573473	5	564269	565811	>s690909>s690910>s142638<s770355>s142640>s142641>s142642<s1197426>s142643>s142644>s142646>s142647>s142650>s1580445>s142653>s142654>s142655>s142656>s142657>s142658>s142659>s142660>s142661>s142662>s142663	-0.0538441	0.0341664	5	667505	-0.03249	0.943577	rs72707023	rs74553517	1949	0.953	665556	NR
5	573274	573473	5	564269	565811	>s690909>s690910>s142638<s770355>s142640>s142641>s142642<s1197426>s142643>s142644>s142646>s142647>s142650>s1580445>s142653>s142654>s142655>s142656>s142657>s142658>s142659>s142660>s142661>s142662>s142663	-0.0538441	0.0341664	5	667505	-0.03249	0.943577	rs72707023	rs72707023	0	1	667505	TPPP
19	37666858	37667057	19	37658093	37658146	>s547246	-0.0279168	0.0342457	19	37661144	-0.02097	1	rs76497538	rs62110225	190804	0.954	37852209	NA
19	37666858	37667057	19	37658093	37658146	>s547246	-0.0279168	0.0342457	19	37661144	-0.02097	1	rs76497538	rs62110225	190804	0.954	37852209	NA
19	17160923	17161122	19	17167072	17167072	*	0.0249915	0.034365	19	17180212	-0.01622	1	rs187694363	rs115436704	16792	0.966	17197004	MYO9B,USE1,OCEL1,NR2F6
[truncated: 418 more rows]

## Sheet: README
Table S4: Leading SV-mQTLs within 10kbp of SNPs in high linkage-disequlibrium (LD) (R2 > 0.95) with known GWAS SNPs. Each SV-mQTL is annotated with the distance to the SNP, the GWAS SNP, the magnitute of the LD, and the associated gene.
